# Supplementary material for: The temporal evolution of cancer hallmarks
Source: Research Square preprint supplement (doi:10.21203/rs.3.rs-5499335/v1), 2024-12-11
Supplement: Supplementary file 1 [file 1a4a76b979652df17623505c.xlsx]

## Sheet: Supp_table_1_TCGA
Study Abbreviation	Study Name
ACC	Adrenocortical carcinoma
BLCA	Bladder Urothelial Carcinoma
LGG	Brain Lower Grade Glioma
BRCA	Breast invasive carcinoma
CESC	Cervical squamous cell carcinoma and endocervical adenocarcinoma
CHOL	Cholangiocarcinoma
COAD	Colon adenocarcinoma
ESCA	Esophageal carcinoma
GBM	Glioblastoma multiforme
HNSC	Head and Neck squamous cell carcinoma
KICH	Kidney Chromophobe
KIRC	Kidney renal clear cell carcinoma
KIRP	Kidney renal papillary cell carcinoma
LIHC	Liver hepatocellular carcinoma
LUAD	Lung adenocarcinoma
LUSC	Lung squamous cell carcinoma
DLBC	Lymphoid Neoplasm Diffuse Large B-cell Lymphoma
MESO	Mesothelioma
OV	Ovarian serous cystadenocarcinoma
PAAD	Pancreatic adenocarcinoma
PCPG	Pheochromocytoma and Paraganglioma
PRAD	Prostate adenocarcinoma
READ	Rectum adenocarcinoma
SARC	Sarcoma
SKCM	Skin Cutaneous Melanoma
STAD	Stomach adenocarcinoma
TGCT	Testicular Germ Cell Tumors
THYM	Thymoma
THCA	Thyroid carcinoma
UCS	Uterine Carcinosarcoma
UCEC	Uterine Corpus Endometrial Carcinoma
UVM	Uveal Melanoma
Supp table 1. List of tumor abbreviations

## Sheet: Supp_table_2_genes
METASTASIS	IMMORTALITY	GROWTH	IMMUNE	GENOME INSTABILITY	ANGIOGENESIS	METABOLISM	DEATH	PROLIFERATION	INFLAMMATION
CD80	JUN	MOBKL1B	STAT3	NEIL2	STAT3	CALM3	PLA2G15	MOBKL1B	STAT3
CD86	STAT3	MIR520H	CD80	POLE3	ELK1	CALM2	TNFSF12-TNFSF13	SLC27A5	CD80
CD28	JARID2	MIR133A2	CD86	CYP3A5	CCL3L1	CALM1	TNFSF13	SLC27A4	CD86
TNN	IGF1	MIR135A2	MALT1	IGF1	CCL3L3	PGK2	TNFSF12	BIRC5	MALT1
IGF1	GDF7	MIR135A1	STAT1	UGT2B28	TNFSF12-TNFSF13	STAT3	BIRC5	TNN	STAT1
BIRC3	VANGL1	CALM3	STAT2	CYP3A4	TNFSF13	RAB10	TNN	IGF1	STX7
XIAP	IGF1R	CALM2	CD28	GADD45B	TNFSF12	PGK1	TNFSF10	APOA2	STAT2
CD34	FZD1	CALM1	CCL3L1	GSTP1	CCL2	PPARGC1A	IGF1	CD36	CD28
CD36	FZD4	ANGPT4	CCL3L3	GSTT2	TNFRSF8	IGF1	BIRC3	APOA1	CD274
IGF1R	FZD6	STAT3	TLR9	GSTT2B	IGF1	TNFSF10	TNFRSF8	IL21R	CCL3L1
INS-IGF2	SENP2	MIR137	CCL2	ZMAT3	TNFSF10	PGLS	XIAP	IGF1R	CCL3L3
INS	FZD7	ELK1	GNB4	GSTT1	TNFSF9	SDS	TNFSF9	INS-IGF2	CCL2
IGF2	LEF1	SCRIB	TNFSF10	EME1	TNFSF8	CD36	TNFSF8	INS	GNB4
MYH13	FZD8	MIR602	CCL3	IGFBP3	CCL3	IGF1R	TNFSF14	IGF2	BIRC3
NRG3	FZD9	BIRC5	ADRBK2	MSH6	TNFSF14	HAO2	CD36	SLC44A4	XIAP
SIPA1	PRICKLE1	TNN	ADRBK1	POLD3	IL21R	ADIPOR2	HRK	UCP1	CCL3
ROCK1	SMARCAD1	GNB4	CCL5	TP73	IGF1R	FBP1	IL21R	LASS4	ADRBK2
ROCK1P1	MEIS1	IGF1	CCL4	HSD11B1	CCL5	BCL6	IGF1R	GDF1	SCARB1
CD22	SKIL	GDF7	CCL13	PTGS2	FZD1	TKTL2	IGF2R	LASS1	COMP
MAP3K7	MYF5	IGF1R	CCL11	GSTA5	INS-IGF2	PGD	ATP6V0A1	NRG3	ADRBK1
CD14	CTBP2	FZD1	CCL8	RAD54B	INS	PGAM2	ARSG	RCAN1	CD34
RASGRP3	ROCK1	FZD4	RIPK1	PMAIP1	IGF2	PGAM1	ATP6V0B	ROCK1	CD36
DRD1	ROCK1P1	FZD6	CCL7	GSTA3	CCL4	ULK1	RIPK1	ROCK1P1	TNFSF14
DRD2	CTBP1	FZD7	FCER1G	LRDD	FZD4	MAP3K7	CARD8	CD19	CCL5
TUBA3D	WNT9B	FZD8	SIPA1	GSTM1	FZD6	AKT1	IGFBP3	PLTP	CCL4
TUBA3C	PCGF3	LEF1	ROCK1	ARNT	CCL13	AKT2	ATP6AP1	STAM	CCL13
RASAL1	WNT9A	FZD9	ROCK1P1	UGT2B11	FZD7	DAK	LASS4	MAP3K7	ATP6V0A1
CD4	DAAM2	ST14	MYL7	GSTA4	CCL11	EEF2K	CLTCL1	IL22	ATP6V1G2
CSF1R	TBL1XR1	RRAS2	CD19	LOC648152	FZD8	ENO1	GDF1	APOC3	CCL11
CSF1	MAP3K7	LOC100133211	CCL14	LOC651921	CCL8	PFKP	LASS1	CD14	ATP6V0B
MAPK14	VANGL2	PGF	CCL15	ATR	CCL7	PIK3R5	NRG3	RASGRP3	CCL8
SHOC2	JAK1	MIR141	LY96	GSTM4	FZD9	PHKB	AP4B1	CSF2	FCGR1A
CD8A	WNT2B	MIR145	MAP3K8	GSTM3	TNFRSF17	PHKA2	ROCK1	RASAL1	FCGR1C
CD8B	WNT11	ROCK1	MAP3K7	GSTM2	SPHK1	ME3	ROCK1P1	CSF1R	RIPK1
CD6	AKT1	ROCK1P1	AKT1	NAT1	RRAS2	MAPK14	ULK1	CSF1	CCL7
DUSP1	AKT2	MIR520G	AKT2	GSTM5	LOC100133211	CS	CD19	NSMAF	ATP6AP1
DUSP2	WNT10B	MIR143	CCL18	RAD54L	TNFSF11	PHKA1	MAP3K7	SHH	FCAR
GUCY1A2	JAK3	WNT9B	ARRB2	APAF1	ROCK1	PHKA1P1	IL22	MAPK14	SIPA1
NCK2	JAK2	WNT9A	C9	GORAB	ROCK1P1	ALDH1B1	ATP6V0A4	AOX1	BCL3
ECSIT	SETDB1	MIR146A	CD14	ALDH3A1	CTTN	ALDH2	PMAIP1	SHOC2	TNFSF11
DUSP7	NRAS	WNT2B	CCL17	SIAH1	WNT9B	ALDH3A1	CD27	IFNE	ROCK1
DUSP5	AXIN1	AKT1	A2M	ALDH1A3	WNT9A	SMEK2	LOC648152	CSF2RB	ROCK1P1
SIAH1	AXIN2	WNT11	ARRB1	ALDH3B1	CCL14	TALDO1	LOC651921	PLN	MYL7
DUSP6	MYC	WNT10B	CCL20	CD82	CCL15	SHMT1	ATR	CSF2RA	CCL14
DUSP3	PIK3R5	AKT2	CCL19	ALDH3B2	WNT2B	PLK1	TUBA3D	DUSP1	CCL15
TBL1Y	CSNK2A1	PLA1A	MYL12A	APEX1	IL22	SHMT2	TUBA3C	DUSP2	CD22
DUSP4	CSNK2A1P	BRAP	CCL21	NAT2	AKT1	PLK4	CSF2	IL23R	LY96
BIRC2	CSNK2A2	RASGRP3	CCL23	THBS1	WNT11	ALDH1A3	CSF1R	PLIN1	MAP3K8
CD2	NFATC4	AXIN1	CCL22	MPG	WNT10B	ALDH3B1	CSF1	NCK2	MAP3K7
APC	CSNK1A1	AXIN2	POLR3C	CASP9	AKT2	ALDH3B2	NSMAF	ECSIT	ATP6V0A4
CBLC	MAPK14	MIR152	STAT5B	CASP8	CD27	ALDH9A1	MAPK14	CSF3	AKT1
PLCG1	NFATC3	MIR150	POLR3G	TSC2	CCL18	CAMK2A	APAF1	DUSP7	AKT2
PLCG2	CSNK1E	LOC100128528	FCGR3B	CDK1	CCL17	ALDH3A2	CD164	DUSP5	CCL18
PLD1	KRAS	MIR520C	POLR3F	RCHY1	CCL20	GALM	IFNE	SIAH1	ARRB2
PLD2	SKP1	PIK3R5	RAET1E	OGG1	CCL19	CAMK2B	TNFRSF14	DUSP6	CD14
TUBBP2	TGFB2	MIR122	C8A	BAI1	CCL21	CAMK2D	CSF2RB	DUSP3	LRDD
TUBBP1	FBXW11	MIR1-2	C7	ADH1C	CCL23	ALDOA	CSF2RA	TBL1Y	CCL17
LOC442308	TGFB1	CSF1R	CCL16	ADH1B	CCL22	CAMK2G	IL23R	DUSP4	ARRB1
TUBB	SMAD5	RASAL1	FCGR3A	ADH1A	CCL16	ALDOB	PLK1	CSH1	CCL20
HBEGF	ID3	CSF1	JAM2	ADH4	CSF2	AGXT	NCK2	CSF3R	MYL12A
MAP3K2	RBX1	MIR124-2	C8G	MRE11A	PIK3R5	SETD7	CSF3	BIRC2	CCL19
PLCB2	LY6G5B	MIR124-1	C8B	ADH5	CSF1R	CALML3	SIAH1	CSH2	CCL21
PARD6A	CSNK2B	MIR10A	CSF2	ADH5P4	IL13RA1	SDHA	PLK4	APC	CCL23
PLCB3	TGFBR2	MIR107	PIK3R5	MLH3	TNFRSF13C	PGM1	CSH1	UBC	CCL22
PLCB4	ESX1	MIR1-1	CD4	BAX	CSF1	SQRDL	CSF3R	CBLC	STAT5B
CDK1	TGFBR1	MIR10B	TNFRSF13C	TP53AIP1	MIR10A	GPI	BIRC2	PLCG1	FCGR3B
PTPN5	SIAH1	SHOC2	HCST	SULT1A3	MAPK14	ACSS2	CSH2	PLCG2	EEA1
BAD	SMAD9	UBE2I	MAPK14	SULT1A4	MIR10B	PLCB2	CBLC	PLD1	FCGR2A
HOXD10	SMAD7	FOXP1	TAP2	MGST2	TNFRSF14	PLCB3	IL17B	IL20	CCL16
PLAUR	LEFTY2	MIR124-3	CD8A	SHFM1	IFNE	PLCB4	PLCG1	PLD2	FCGR3A
PDCD1	TBL1Y	AFP	TAP1	MGST1	CCL24	GLS2	PLCG2	HBEGF	JAM2
PLAU	TGFB3	PLCE1	CD8B	CASP3	CSF2RB	TSC2	PLD1	MAP3K2	FCGR2B
F11R	SMAD6	ID3	CCL24	MGST3	CSF2RA	PGM2	IL20	PLCB2	FCGR2C
CLDN19	CAMK2A	MIR125A	C6	PERP	CX3CL1	CREB3L4	PLD2	PARD6A	TUBA3D
PLA2G2A	CAMK2B	MIR125B1	C5AR1	SESN3	IL23R	CAT	HBEGF	PLCD1	TUBA3C
PLA2G4A	CAMK2D	MIR129-2	CX3CL1	UGT1A7	XCL1	LOC100130320	ATP6V0C	PLCB3	CSF2
MECOM	CAMK2G	MIR129-1	C5	UGT1A1	PLCE1	SDHD	PLCB2	PLCB4	PIK3R5
PLA2G5	APC	MIR128-2	BDKRB1	UGT1A4	CXCL5	OGDH	PLCB3	CREB3L4	CD4
PRKD3	ACVR1C	MIR128-1	XCL1	UGT1A8	CXCL11	SDHB	PSMB11	TEAD2	TNFRSF13C
FOSL1	WNT16	ABCB1	C4BPB	UGT1A9	CXCL6	SDHC	PLCB4	PTPN5	CSF1
CUL1	DAAM1	MIR126	CXCL5	UGT1A6	CSF3	GYS1	CREB3L4	BAD	COLEC11
GUCY1B3	TGIF1	BIRC2	CXCL11	UGT1A5	CCL25	GYS2	CDK1	PCYT1A	MAPK14
ETS1	INHBE	MIR125B2	CD247	UGT1A10	CXCR3	ADH1C	BAI1	HOXD10	TUBB2B
ETS2	NFATC2	APC	CXCL6	UGT1A3	CAMK2A	ADH1B	BAD	NR1H3	ALCAM
GUCY1A3	NFATC1	WNT16	C4BPA	LOC100133012	CSF3R	ADH1A	BAK1	GYS1	LOC100133690
PLA2G1B	THBS1	CALML3	NCK2	LOC646096	CAMK2B	HK3	BAK1P1	GYS2	TAP2
ITGA10	PLCB2	PLCG1	C4B	CHEK2	CAMK2D	ADH4	GYS1	PLAUR	CD8A
IKBKG	PLCB1	PLCG2	CCL25	NBN	CAMK2G	ADH5	GYS2	LASS2	UBE2I
HRAS	PLCB3	PLD1	C4A	UNG	CBLC	ADH5P4	LASS2	PLAU	TAP1
ITGA8	PLCB4	PLD2	BDKRB2	PCNA	CLCF1	FGFR2	PKN3	PKN3	CD8B
CD63	INHBB	MIR133A1	CFB	ADH7	WNT16	FGFR3	ERBB2IP	PLA2G2A	CD6
CD58	INHBC	KSR1	CXCR3	RPA4	IL17B	FGFR1	PLA2G4A	SOCS6	CANX
TUBAL3	INHBA	RECK	AICDA	ADH6	CCR10	PLK2	GUSB	PLA2G4A	CCL24
GDF5	PRICKLE2	PARD6A	CD3D	PARP4	CXCL12	RPS6KB1	DNM1L	MECOM	CX3CL1
CD47	PORCN	GLS2	CD3E	PARP3	CCL4L1	RPS6KB2	BAX	PLA2G5	XCL1
CD44	FGF2	FGF9	SERPINF2	PARP2	CCL4L2	TSC1	TP53AIP1	BAX	CXCL5
DAG1	NEUROG1	FGF8	AIRE	PTENP1	PLCG1	GRB2	CD70	FOSL1	PLA2R1
FGF23	MYST3	FGF7	CD3G	PTEN	SDC2	CREB5	TNFRSF11B	OLR1	CXCL11
RASSF5	ESRRB	LOC100132771	CBLC	MUS81	PLCG2	PKLR	PLK2	CUL1	CXCL6
MYL12B	MAPK9	FGF7P2	CLDN23	NEIL3	XCR1	LOC652797	CUL1	CREB5	CCL25
PITX2	MAPK10	FGF6	PLG	TDG	IL20	PKM2	CREB5	ETS1	CXCR3
NKD1	WNT3A	FGF5	C2	LOC732360	SDC4	HRAS	IL19	IL19	CALR
CD40LG	MAPK11	SNAI2	ORAI1	LIG3	HBEGF	PCK2	ENTPD4	ETS2	BIRC2
CNTNAP1	LOC407835	MIRLET7E	CCR10	SYCP3	SDC1	PCK1	AP1M2	PLA2G1B	CD2
CD40	MAP2K2	JUB	C1S	STEAP3	CASP9	SGK3	ITGA10	ITGA10	ATP6V1D
NKD2	MAPK13	MIRLET7D	CXCL12	FEN1	HPSE	STK11	YWHAQ	YWHAQ	CLDN23
PIK3R3	MAP2K1	FGF3	C3AR1	SULT1A2	CCL27	PFKM	IKBKG	IKBKG	CCR10
CACNA1H	FGFR2	MIRLET7F2	CCL4L1	LIG1	VTN	PFKFB4	HRAS	HRAS	CXCL12
CACNA1G	ID1	MIRLET7F1	CCL4L2	UGT2B10	FGF2	PFKL	ITGA8	ITGA8	ATP6V1A
CACNA1I	ID2	FGF4	LOC653879	UGT2B7	BAD	CCNA1	CD68	PCK2	JAG1
SHROOM4	FZD3	TEAD2	LOC100133511	SHISA5	HOXD10	GPT	PCK2	CD63	CCL4L1
LRP5	CXXC4	MIRLET7A3	C3	UGT2B4	PLAUR	STK4	CD63	PCK1	CCL4L2
LRP6	FGFR4	FGF1	PLCG1	UGT2B17	PLAU	PFKFB3	CTSF	SGK3	LOC653879
F2R	FOSL1	FGF2	KLRK1	PARP1	PLA2G4A	PFKFB2	PCK1	DGKQ	LOC100133511
TAOK2	SOST	MIRLET7A2	C1QB	CCNB3	CD70	PFKFB1	SGK3	DGKB	C3
PDCD1LG2	FGFR3	MIRLET7C	C1QA	UGT2B15	CASP3	ADH7	TUBAL3	GDF5	PLCG1
ITGA9	FGFR1	KIF23	PLCG2	HMGB1	TNFRSF11B	ADH6	GDF5	DGKG	SDC2
ITGAL	RPS6KB1	MIRLET7B	C1R	HMGB1L10	FGFR1	PRMT1	CD47	CD44	PLCG2
CACNG8	RPS6KB2	FGF21	XCR1	MBD4	RPS6KB1	PIK3R3	CD44	NCOA3	C1R
ITGAM	CUL1	BAD	C1QC	CCBL1	CXCR6	ADRA1A	DAG1	FGF23	XCR1
CACNG6	GRB2	MIRLET7A1	TLR7	PPM1D	RPS6KB2	PRPS1L1	FGF23	DGKA	SDC4
CD276	WNT4	HOXD10	SERPING1	BRCA2	GRB2	PRPS1	OPRD1	RASSF5	TUBBP2
CACNG7	WNT10A	BAK1	MASP2	MDM4	RELT	SUCLG1	AP1S2	OPRD1	TUBBP1
PAK4	SMAD3	BAK1P1	PLCB2	MLH1	IQGAP1	SUCLA2	LOC653653	STK36	LOC442308
ITGA4	KLF4	GNG8	ADCY8	GSTO1	IL19	ATF4	AP1G2	PITX2	TUBB
ITGA3	MPST	PLAU	CASP8	UGT2A2	PLA2G4F	ATF4C	AP1M1	TRADD	ATP6V1E1
ITGA2B	SMAD4	SAV1	ADCY9	MDM2	TWIST2	LOC283398	PITX2	NKD1	SDC1
APC2	SMAD1	PLA2G2A	ADCY6	TP53I3	RPS6P25	SUCLG2	TRADD	SLCO1C1	ATP6V1B2
ITGA7	SMAD2	PLA2G4A	ADCY7	TOP3B	RPS6P1	TST	TNFRSF25	NKD2	ATP6V1B1
ITGA5	NBL1	PLA2G5	PLCB3	RFWD2	RPS6	CAMKK2	PARP3	PIK3R3	ATP6V1C1
MAP4K3	HRAS	ID1	ADCY5	GADD45G	HRAS	IRS4	CD40LG	DHH	ATP6V0C
CTNNBIP1	WNT1	RASA2	PLCB4	EI24	WNT1	CCNB3	PRMT1	CACNA1H	CASP10
PARVB	WNT7A	FGFR2	VWF	LOC651610	CD63	STRADB	CD40	CACNA1G	PLCB2
WASF1	WNT7B	TP63	ICAM2	ATM	HPSE2	GCK	PARP2	CACNA1I	ADCY8
ITGB3	GDF5	ID2	CCL27	MUTYH	WNT7A	HOMER2	PIK3R3	LRP5	CASP8
MAP3K11	WNT8A	RASGRF1	WAS	SESN2	RNASEN	GLUD2	SCARB2	LRP6	HLA-DOA
CER1	WNT8B	RASGRF2	PREX1	CBR1	WNT7B	HOMER3	CLN5	F2R	HLA-DOB
ITGB4	HESX1	FGFR4	ICAM1	UGT2A3	OSM	GCGR	STEAP3	TAOK2	CASP7
NRG2	WNT2	SYNGAP1	VTN	EXO1	CBLB	HOMER1	TPP1	ITGA9	ADCY9
ITGB5	WNT3	CASP3	FGB	XRCC3	GDF5	GCG	CLN3	CACNG8	ADCY6
ITGB6	WNT5A	FGFR3	PLAT	SMUG1	CBL	ESD	SHISA5	CACNG6	ADCY7
ITGB7	CTNNB1	RASA1	HLA-C	XRCC1	WNT8A	GLUD1	IRS4	CACNG7	SEC61B
ITGAV	WNT6	FGFR1	HLA-B	XRCC2	WNT8B	GABARAPL3	CCNB3	PAK4	PLCB3
DAXX	PPP2CB	FGF14	IRAK4	GSTK1	CD44	GABARAPL1	F2R	ITGA4	ADCY5
ITGB1	PPP2CA	FGF17	GNG8	POLD4	WNT2	GLS	ITGA9	ITGA3	PLCB4
ITGB2	OTX1	RPS6KB1	PLAUR	BBC3	WNT3	ATG12	ATG12	ITGA2B	ICAM2
ID4	PPP2R1A	FGF16	HLA-A	GADD45A	WNT5A	G6PC3	PAK4	APC2	CCL27
PLA2G16	PPP2R1B	RPS6KB2	PDCD1	DDB2	WNT6	HMGCR	ITGA4	SLC44A1	ICAM3
NRXN3	FST	MIR106B	F11R	GTSE1	IL22RA1	FOXG1	ITGA3	ITGA7	CREB3L4
GNA12	PITX2	CUL1	PLAU	RAD50	TNFRSF25	ME1	ITGA2B	ITGA5	WAS
BMP8A	LTBP1	FGF10	NOX1	AKR1C2	ROCK2	ECHS1	ITGA7	SLC44A3	CLEC7A
BTRC	LEFTY1	FGF11	CLDN19	UGT2A1	CD40LG	RHEB	ITGA5	DBI	PGAM5
GNA11	NKD1	GRB2	RFXANK	POLE2	CD40	BRAF	AP4S1	CHPT1	PREX1
SHC3	ROCK2	FGF12	CASP1	CCND1	PIK3R3	MDH2	PPM1D	MAP4K3	ICAM1
L1CAM	FZD10	FGF13	CD79A	POLB	CAV2	MDH1	RHEB	CTNNBIP1	CFLAR
GNAI1	FZD5	ETS1	CASP3	POLD1	CAV1	MDM2	EDA	RHEB	HLA-C
RAPGEF5	NKD2	ETS2	CXCR6	CYP3A43	PLA2G4C	IKBKB	CDC37	LRP2	HLA-B
GNAI2	PIK3R3	PLA2G4F	GRB2	POLD2	CAV3	LDHAL6B	CXCL14	CDC37	HLA-DMB
PTPRR	TCF7L1	PLA2G1B	KIR2DL5B	POLE	IL18RAP	CAB39L	ITGB3	CSNK1G1	HLA-DMA
GADD45A	RUVBL1	YWHAQ	KIR2DL5A	CHEK1	IL17RA	IDH3B	ITGB4	WASF1	IRAK4
ITGB8	PPP3CB	IKBKG	IKBKG	MSH2	IL18R1	IMPAD1	NRG2	CER1	GNG8
DDIT3	PPP3CA	HRAS	HRAS	SULT1A1	TWIST1	FH	ITGB5	ITGB3	HLA-A
PVRL4	ZFHX3	WNT1	SERPINA5	SERPINE1	TNFSF4	GADD45A	ITGB6	MAP3K11	PDCD1
NRXN1	LIF	WNT7A	CD59	APEX2	TNFRSF4	HADHA	TP53I3	ITGB4	F11R
NRXN2	GPC4	WNT7B	CBLB	MSH3	HSPG2	IDH3A	ITGB7	NRG2	PLAU
MAGI3	TST	GDF5	CD48	CYCS	ESR1	IDH2	ITGAV	ITGB5	NOX1
LOC646079	LIFR	WNT8A	CBL	PTGDS	SH2D2A	IDH1	DAXX	ITGB6	CLDN19
BCAR1	MOCS2	WNT8B	LAT	HPGDS	CX3CR1	RAB11B	ABCB9	ITGB7	DNM1L
GNAQ	MOCS1	LAT	RASSF5	CCND2	ITGA5	CCNA2	ITGB1	ITGAV	RAB7B
GNAS	LRP5	WNT2	CD55	CCNB1	BRAF	C8ORF62	LAPTM4A	DAXX	CASP3
GNAI3	LRP6	CD44	CLDN11	CCNE1	EDA	PSAT1	GZMB	ITGB1	ATP6V0A2
GNAO1	NOG	FGF23	PYCARD	CCND3	CXCL14	ADIPOQ	GM2A	ITGB2	OLR1
ZFYVE9	RIF1	HTR7	MYL12B	RAD51L1	MDM2	GNAQ	EI24	ID4	CD226
CDC25B	SFRP2	WNT3	UNG	CYP2E1	JMJD7-PLA2G4B	H6PD	ID4	PLA2G16	CXCR6
GNB1	PPP3R2	RASSF5	ROCK2	SFN	JMJD7	GNAS	GNA12	RASSF6	GRB2
LPAR2	SFRP1	WNT5A	CD40LG	RAD52	PLA2G4B	MINPP1	BMP8A	ACSBG2	CREB5
MAP3K13	PPP3CC	WNT6	CD40	RAD51L3	ITGB3	SCD5	PYDC1	LPL	CNTNAP2
ZFYVE16	PPP3R1	FGF18	RAP1A	EPHX1	IL1A	CCND2	SHC3	FABP1	STX12
LMO7	LHX5	STK4	PIK3R3	SULT2A1	ITGB5	CCNB1	AP3D1	FABP4	IKBKG
DCN	TGIF2	STK3	RAP1B	BLM	CTSL1	IDH3G	GNAI1	FABP2	HRAS
CDC42	NOTUM	PITX2	GRK6	RFC4	ITGAV	PPP2R3C	GNAI2	GNA12	ITGA8
CDC42P2	APC2	LEFTY1	FGA	RFC5	ITGB1	RPE	KIAA0652	BMP8A	NEGR1
CDH1	CREBBP	NKD1	CLDN14	RPA1	IL24	LOC729020	GADD45A	BTRC	CD58
CACNA2D1	INVS	RAP1A	TBK1	RRM2B	MIR21	GRM1	ITGB8	SHC3	TUBAL3
GRM5	ZIC3	PIK3R3	SERPINC1	RAD51	TNFSF13B	SUOX	DDIT3	GNAI1	LAT
CACNB1	CTNNBIP1	RAP1B	CTNNA3	RPA3	PDGFC	RGN	DDB2	RAPGEF5	RASSF5
CACNB2	CTU2	TNC	BCL10	RPA2	HSPB1	FASN	URM1	GNAI2	ATP6V1E2
CACNB3	MMP7	PLA2G4C	LOC646626	CYP2C18	HSPBL2	INS-IGF2	IL22RA2	PTPRR	CLDN11
CACNB4	SERPINF1	RALGDS	GRK4	SERPINB5	HSPB2	INS	CCL4L1	DGKI	TUBA4A
CACNG1	CER1	TBK1	GRK5	RAD51C	NGFR	IGF2	CCL4L2	GADD45A	MYL12B
GRM1	DKK2	MIR103-2	F2	RPRM	IL22RA2	IL7R	GNAQ	DDIT3	TRADD
WIF1	AKT3	MIR103-1	TXK	CHRNA7	FIGF	TBC1D1	PPT2	ITGB8	ROCK2
FRAT2	DKK4	MIR101-2	F2R	CHRFAM7A	DCN	ERBB2	SORT1	PVRL4	CNTNAP1
GRIN1	ID4	RASAL2	ITGAL	BID	CDC42	GOT2	GNAI3	FABP3	CD40LG
CACNA1A	RBL1	MIR101-1	ITGAM	RFC1	CDC42P2	ALDH7A1	ZFYVE9	FABP5L8	CD40
DVL3	PCGF5	CTNNA3	PAK4	RFC3	TNFSF15	GOT1	AP4E1	FABP5L9	RAP1A
GRIN2A	NFS1	IGF2BP1	ITGA4	RFC2	EPO	MLYCD	GNB1	FABP5L7	PIK3R3
DVL2	NODAL	SLC45A3	CX3CR1	CYP2C9	IL9R	LDHAL6A	LPAR2	FABP5	RAP1B
GRIN2B	HOXB1	MIR100	ICOS	CYP2C19	CXCL1	INSR	ZFYVE16	FABP5L2	GRK6
CACNA1D	SOX17	MIRLET7I	F2RL2	CYP2C8	CXCR5	IL10	AP4M1	FABP6	CLDN14
WASL	SMURF1	MIRLET7G	F3	CYP2A13	GPC1	SIRT1	DCN	FABP7	CTNNA3
CACNA1E	MAPK12	TRIM71	C6ORF150	CCBL2	IFNA5	SIRT3	IDUA	IL22RA2	ATF4
CACNA1B	BMP8A	EZH2	F5	SSBP1	IFNA4	BPGM	ITCH	IL17D	ATF4C
LOC100131098	BTRC	NOG	F7	CYP3A7	IFNA2	DLST	CDC42	ADIPOQ	BCL10
CACNA1C	LOC729590	GLS	F10	GSTA1	IFNA1	DLSTP1	CDC42P2	GNAQ	LOC646626
DUSP8	BAMBI	PAK4	F9	GSTA2	CXCR2	FOXO6	PPP2R3C	GNAI3	DYNC1LI1
CACNA1F	CHRD	TGIF2	F8	POLE4	CXCR1	EP300	IDS	ZFYVE9	GRK4
CACNA1S	URM1	APC2	HLA-G	RRM2	IL9	SDSL	CXCL1	ACSL1	GRK5
RASSF1	WNT5B	ITGA5	AIM2	CDKN2A	IL7R	FBXO32	IFNA5	CDC25B	SEC61A1
CLDN15	CCND1	RASA4P	BRAF	CDKN1A	IL8	BNIP3	IFNA4	GNB1	PARP1
DVL1L1	GDF6	RASA4	CXCL14	CYP2A6	ERBB4	SLC16A3	GRM1	LPAR2	IL18R1
DVL1	NLK	PLA2G6	IKBKB	TNFRSF10B	IL12RB1	HNF4A	LMNA	MAP3K13	ATP6V1G1
GPC3	ACVR2B	PLA2G10	SHC4	CYP1A1	IL12B	ENO3	IFNA2	ZFYVE16	TXK
MAP4K1	HAND1	RPS6KA5	DOCK2	CYP1A2	ERBB2	ENO2	LMNB1	LMO7	CORO1A
DUSP9	ACVR2A	MDM4	CTSK	CYP1B1	IL13	SLC7A5	IFNA1	ATP1B4	PDCD1LG2
DDX5	ACVR1B	BRCA1	ITGB1	NEIL1	ERBB3	GLDC	INS-IGF2	DCN	ITGA9
GRLF1	PRKACA	MDM2	ITGAX	POLL	IL12RB2	DLD	INS	CDC42	VAMP3
INSR	ACVR1	JMJD7-PLA2G4B	IGLL1	CDK2	IL11RA	DLAT	IGF2	CDC42P2	ITGAL
RPS6KA4	PRKACB	JMJD7	ITGB2	TOP3A	IL12A	CCNB2	RXRA	ACSL3	ITGAM
CSNK2A1	PRKACG	PLA2G4B	GZMB	SESN1	KDR	G6PD	GLA	CDH1	SEC22B
CSNK2A1P	SP1	MIR103-2AS	IKBKE	CDK4	IFNA17	G6PC	IFNA17	PPP2R3C	CD276
GAB2	ZFYVE9	IKBKB	F12	TP53	GPC3	SREBF1	IFNA21	ACSL4	ICOSLG
GSK3B	CHD8	ITGB3	F13A1	CCNE2	IFNA21	IRS1	IFNA6	CACNA2D1	ITGA4
RRAS	MOCS3	SHC4	F11	PMS2	IFNA6	TKTL1	FUCA1	ACSBG1	CX3CR1
IFNG	FRAT1	BMF	F13B	FAS	IFNA7	IL6	IFNA7	CACNB1	ICOS
FARP2	CACYBP	FRMD1	GRK1	CDK6	IFNA8	NTRK1	IFNA8	CACNB2	ITGA5
NTF4	LOC644877	ITGB2	NCR1	NTHL1	IFNA10	CALML6	IFNA10	CACNB3	CTSS
NTF3	ZFYVE16	ID4	NCR2	GSTO2	IFNA13	NTRK3	ATP6V0D1	CACNB4	HGS
ITGA6	CCND2	PLA2G16	FGG	CCNB2	IFNA14	ACADS	IFNA13	CACNG1	CADM1
GLG1	DCN	RASSF6	SHC3	CCNG1	IFNA16	PPP2R2D	IFNA14	IFNA5	TUBB2A
ITGA2	CCND3	NODAL	FGR	CCNG2	IL26	PRPS2	IFNA16	IFNA4	HLA-G
ITGA1	SOX2	LLGL1	GNAI1		DDX5	ACADM	INSR	WIF1	BRAF
HCLS1	PCGF6	MIR21	GNAI2		CXCL16	ACAT2	RPS6KA4	IFNA2	RPS6KA5
VTCN1	PCGF2	LLGL2	RIPK3		IL10	ACAT1	CXCL16	IFNA1	CXCL14
E2F5	CSNK1A1L	CDCA5	CTNND1		EDA2R	GADD45B	SIRT1	FRAT2	IKBKB
AMOTL1	RAF1	BMP8A	MAP3K14		IL10RA	TPI1	BAG4	FRMD6	ITGB3
E2F4	PRKCB	PDGFC	HLA-E		IL10RB	TPI1P1	GLB1	GRIN1	ITGB5
ARHGEF1	TFDP1	BTRC	BTK		EPOR	CREB3	GAB2	CACNA1A	SHC4
FZD2	PRKCA	SHC3	BLNK		IL11	EIF4EBP1	GSK3B	DVL3	ITGB7
FYN	BMI1	MIR214	CD46		IL3RA	HK2P1	RRM2	GRIN2A	DOCK2
NTRK2	TRMU	LOC100128178	LOC646079		IL3	HK2	IFNGR2	DVL2	CTSL1
NTRK1	TNF	MIR215	BCAR1		IL2RG	HK1	XCL2	GRIN2B	ITGAV
FYB	WIF1	DNMT1	GNB5		IL2RB	RAB8A	IFNG	CACNA1D	ITGB1
JUN	HNF1A	KSR2	CLDN16		MAPKAPK2	CFTR	IFNGR1	GK3P	ITGB2
MEF2C	TCF3	MIR181A1	GNAI3		SPHK2	ITPR3	SYK	GK	GRK1
NRG1	RHOA	DNMT3A	TMEM173		IFNGR2	HIF1A	IFNB1	WASL	HLA-DRB4
PARVA	FRAT2	MIR210	GNB1		XCL2	FLT3	IFNAR1	CACNA1E	HLA-DRB1
HGF	PRKCG	DNMT3B	POLR3A		RRAS	OGDHL	IFNAR2	CACNA1B	HLA-DRB5
NRCAM	TBX3	RAPGEF5	CFI		IFNG	ADIPOR1	IL21	GK2	HLA-DRB3
MAGI2	DVL3	NGF	PTK2B		IFNGR1	NRAS	HEXB	LOC100131098	NRXN3
JUND	RAC2	MOBKL1A	CDC42		IFNB1	ACACB	ITGA6	CACNA1C	TNFSF13B
MPP5	DVL2	MIR206	CDC42P2		IFNAR1	ACACA	TNFSF18	RXRB	DYNC1LI2
GADD45B	RAC3	NGFR	TICAM1		IFNAR2	GABARAP	HEXA	RXRG	SHC3
THBS4	DKK1	MIR324	CXCL1		IL1RAP	MYC	ITGA2	DUSP8	FGR
STMN1	DVL1L1	GDF6	CXCR5		IL1B	CSNK1E	ITGA1	CACNA1F	L1CAM
PRICKLE1	DVL1	MIR133B	IFNA5		IL1R1	KRAS	CXCL2	RXRA	MRC2
EPB41L3	DUSP9	MIR363	MYL9		IL21	AKR1A1	CXCL3	CACNA1S	GNAI1
SIGLEC1	REST	MIR135B	IFNA4		IL2RA	LDHC	E2F5	IFNA17	GNAI2
SNAI1	LOC100271831	GNB5	IFNA2		IL20RB	TGFB2	E2F4	RASSF1	RIPK3
MYH1	MAPK3	HDAC4	IFNA1		TNFSF18	TGFB1	CCNE2	DVL1L1	CTNND1
MAP3K5	TCF7	MIR451	F2RL3		IL20RA	MCEE	DFFA	DVL1	ITGB8
PTK2	RAC1	FIGF	SERPIND1		IL2	LOC100133042	CCNB2	GPC3	MAP3K14
MAP3K1	MAPK1	ZFYVE9	CXCR2		BMPR2	GAPDH	DFFB	MAP4K1	SOCS3
CRB3	TCF7L2	MCL1	CXCR1		SRC	GAPDHL6	G6PC	IFNA21	HLA-F
PTGS2	SMURF2	CDC25B	POLR3E		IL6R	ELAVL1	IFNW1	DUSP9	HLA-E
ITPR3	MAPK8	GNB1	IL7R		LOC643778	GABARAPL2	IRS1	IFNA6	HLA-DPA1
MAP3K3	EP300	CDC25C	MYLPF		BMPR1A	TGFBR2	SPTLC2	IFNA7	NRXN1
CLDN20	GSK3B	CDC25A	IL8		ITGA2	TGFBR1	FYN	IFNA8	BTK
MAP3K4	PSEN1	ZFYVE16	HCK		BMPR1B	CREB3L3	LITAF	IFNA10	HLA-DPB1
HIF1A	DLX5	CCND2	IL12B		HCLS1	MET	NTRK1	IFNA13	BLNK
LAMC2	PAX6	DCN	WASL		IFNK	LDHB	AIFM1	IFNA14	LOC100133678
SMO	PCGF1	CCNE1	BID		IL6ST	TGFB3	JUN	LATS1	HLA-DQA1
NRAS	CDKN2B	MIR625	IL12A		IL7	STRADA	CCL26	IFNA16	HLA-DQA2
LAMB2	IFNG	CDC42	IFNA17		CXCL2	FOXO1	NRG1	CRB1	HLA-DQB1
LAMB3	POU5F1B	CDC42P2	CLDN15		CXCL3	SCO2	HGF	DDX5	LOC100133583
LAMC1	ONECUT1	CCND3	GRAP2		BMP2	FOXO3B	PSMD6	MED4	NRXN2
TIAM1	TBL1X	CDH1	IFNA21		IL28B	FOXO3	JUNB	INSR	LOC646079
LAMA4	POU5F1	MIR195	IFNA6		BMP7	RAG2	GADD45B	RPS6KA4	BCAR1
LAMA5	AMHR2	E2F1	IFNA7		IL29	RAG1	THBS4	CSNK2A1	GNB5
TIMP3	AMH	MIR194-2	IFNA8		IL28A	HKDC1	CARD6	CSNK2A1P	CLDN16
LAMB1	BMPR2	MIR199A2	IFNA10		NANOG	LDHA	ZMAT3	GAB2	GNAI3
PAK6	ISL1	MIR199A1	IFNA13		NANOGP8	SIK1	IL17RB	GSK3B	SFTPA1
MYC	LOC643778	BMI1	IFNA14		IFNW1	SMEK1	LAMP2	IFNGR2	DYNC1H1
LAMB4	BMPR1A	DICER1	IFNA16		ARHGEF1	PLCB1	MEFV	RRAS	GNB1
TGFB2	BMPR1B	MIR194-1	POLR3B		FZD2	SIK2	THPO	IFNG	MADCAM1
MYL2	IL6ST	MIR494	CLDN22		IL4	ADPGK	MAP3K5	IFNGR1	LOC728532
TGFB1	BMP4	MIR192	GRLF1		IL4R	MTOR	PTK2	SYK	DYNC1I2
MYLK	E2F5	INS-IGF2	CXCL16		IL5	BPNT1	SMPD2	IFNB1	DYNC1I1
MYL5	BMP2	INS	IL10		IL5RA	MAPK9	PTGS2	IFNAR1	PTK2B
MAG	E2F4	IGF2	IRF3		IL6	MAPK10	ITPR3	FARP2	ITCH
PIP5K1C	BMP7	LOC644063	TREX1		CCL26	MAPK11	JAK1	IFNAR2	RILP
TAB2	BMP8B	HNRNPK	POLR1C		HGF	LOC407835	CARD18	NTF4	CDC42
SMAD5	PPARD	FRMD6	IL2RG		FN1	MAP2K2	JAK3	NTF3	CDC42P2
TGFBR2	BMP5	MIR20A	GSK3B		IL17RB	MAPK13	JAK2	IL21	HLA-DRA
NFASC	TP53	GRIN1	POLR3D		EIF4B	MAP2K1	MYB	ITGA6	CDH1
TGFBR1	BMP6	MIR19B2	GSK3A		EIF4BP7	HAO1	LAMC2	LIMD1	TICAM1
MET	PIK3CA	MIR200B	IFNGR2		THPO	LOC652799	SLC11A2	ITGA2	CXCL1
SMAD9	PIK3CB	GRIN2A	XCL2		PTK2	LOC653882	SMPD1	GLI1	CXCR5
LEFTY2	PIK3CD	ERBB2	IFNG		IL23A	KIT	NRAS	ITGA1	MYL9
SMAD7	NANOG	DVL3	IFNGR1		ITPR3	PAPSS1	LAMB2	HCLS1	ATP6V1G3
SMAD6	NANOGP8	MIR200A	SYK		PTGS2	PAPSS2	LAMB3	E2F5	CXCR2
TGFB3	CTU1	DVL2	IFNB1		CTF1	PRKAG3	LAMC1	E2F4	CXCR1
PLA2G4E	FZD2	GRIN2B	IFNAR1		HIF1A	LEPR	LAMP1	GLI2	MYLPF
SSX2IP	SFRP5	ERBB3	IFNAR2		FLT1	LEP	LAMA4	GLI3	IL8
IGSF5	PIK3CG	MIR203	IL1B		FLT3	SMAD3	LAMA5	CCNE2	HCK
SV2B	SFRP4	MIR200C	IRAK1		FLT3LG	MPST	LAMB1	G6PC	WASL
ACVR1C	PIK3R1	MIR205	CFH		FLT4	SMAD4	PAK6	IFNW1	CLDN15
LAMC3	PIK3R2	KDR	IL2		NRAS	SMAD2	MYC	ARHGEF1	ATP6V1F
MYH3		RASSF1	SRC		SMO	CPT1C	LAMB4	FZD2	DYNC2H1
MYH2		DVL1L1	CXCL2		TIAM1	ITPR1	GORAB	HDAC1	ATP6V0D1
TGIF1		DVL1	NCR3		TIMP3	ITPR2	TGFB2	IRS1	CLDN22
LCP2		MIR19B1	CXCL3		MYC	KLF2	DIABLO	SPTLC2	GRLF1
MYH4		LATS1	DLG1		PRLR	LIPE	TGFB1	FYN	RPS6KA4
MYH7		CRB1	ELMO1		FLNC	PPP2R2A	TAB2	HDAC2	CSNK2A1
MYH6		MIR199B	CFD		FLNA	RAB14	SMAD5	NTRK2	CSNK2A1P
COL21A1		MIR19A	RAPGEF4		FLNB	PPP2R2B	CCR2	NTRK1	CXCL16
MYH9		TCF7	IL4		KRAS	PPP2CB	TGFBR2	JUN	MPZL1
PLA2G12A		INSR	FYN		PRL	PPP2CA	TGFBR1	MEF2C	BAG4
MYH8		ZFPM2	PARD3		TGFB2	PPP2R1A	MET	NRG1	ATP6V0E2
THBS3		FGF19	IL5		TGFB1	ALDH6A1	CREB3L3	HGF	GSK3B
MYH11		ZEB1	CYBA		CCR2	PPP2R1B	SMAD9	MED30	GSK3A
THBS2		SIRT1	IRF5		TGFBR2	TKT	LEFTY2	MED24	XCL2
MYH10		TCF7L2	CYBB		TGFBR1	USP7	SMAD7	JUND	SYK
PTPN1		MIR181B1	IL6		MET	ACO1	SMAD6	HHIP	SDC3
RASGRP4		MIR520A	IRF7		PLA2G4E	PTENP1	TGFB3	MPP5	ATP6V0E1
THBS1		MIR181A2	JUN		TGFB3	PTEN	PLA2G4E	GADD45B	IL1B
PPP1R12B		DLG3	JAM3		OSMR	ACLY	CD82	THBS4	IL1R1
DUSP10		MIR18A	CCL26		COL21A1	SIRT6	TCIRG1	CYP7A1	IRAK1
CLDN10		MIR17	CLU		PLEKHO2	PSPHL	SV2B	CYP8B1	ITGA6
SORBS1		DLG2	POLR1D		INHBE	PSPH	ACVR1C	STMN1	CNTN2
ZYX		MIR16-2	MYD88		NFATC2	PPP4C	LAMC3	PRICKLE1	SRC
CLDN8		MIR16-1	LBP		THBS1	PPP3CB	TGIF1	THRB	ITGA2
CLDN2		DLG4	VSIG4		CXCL10	PPP3CA	THBS3	THRA	GLG1
CLDN6		EP300	TLR6		PPP1R12B	PPP2R5A	THBS2	THPO	VTCN1
LOC284620		GSK3B	PTK2		MPL	PPP2R3A	PSAPL1	SNAI1	CXCL2
MTOR		GAB2	SH2D1B		INHBB	PPP2R2C	ASAH2C	MAP3K5	CXCL3
CLDN1		RRAS	CLDN20		INHBC	PPP2R5E	ASAH2	PTK2	ELMO1
TUBB4		IFNG	MASP1		IL28RA	PPP2R5D	THBS1	MAP3K1	RAPGEF4
RGL1		MIR15B	JAK3		MTOR	PPP2R5C	TAB3	SMPD2	PARD3
TUBB2C		MIR155	JAK2		INHBA	MTHFR	MTOR	PTGS2	CYBA
PRICKLE2		MIR155HG	NRAS		KITLG	PPP2R5B	KITLG	ITPR3	CYBB
KITLG		CYP1B1	THY1		TNFRSF19	ACO2	TNFRSF19	MAP3K3	IL6
MC1R		MIR15A	GNG13		PPP1R12A	FOXO4	M6PR	MAP3K4	TUBA3E
TUBB3		LIMD1	TIAM1		CXCR4	PDHB	NOS3	HIF1A	JUN
PPP1R12A		BMPR2	NFKB1		IL1R2	CRTC2	PSMD2	PLCD3	JAM3
CACNA2D3		LOC643778	NFKBIB		WNT3A	PDK1	PSMD3	JAK1	CCL26
WNT3A		BMPR1A	ULBP3		NOS3	PDHA1	PSMC6	JAK3	NRCAM
NOS3		MIR193B	CTNNA1		MAPK11	PDHA2	PIK3R4	JAK2	JUNB
ARHGEF12		BMPR1B	PAK6		LOC407835	FBXO25	PSMD1	CYP27A1	CADM3
FZD3		MIR181D	NFKBIA		MAP2K2	PPP3R2	PSMC4	MYB	GADD45B
MAPK8IP3		BMP4	NFKBIE		MAPK13	PPP3CC	LOC652826	LAMC2	THBS4
MAP3K6		E2F5	CTLA4		MAP2K1	PPP3R1	PSMC5	SMPD1	MYD88
MAP3K12		E2F4	NFATC3		ARHGEF12	CREB3L1	PSMC3	SMO	LBP
LOC399942		BMP2	KRAS		LOC652799	CREBBP	PSMC1	NRAS	CREB3
TUBA1B		BMP7	KIR2DS2		LOC653882	ATF2	LOC643668	LAMB2	LAMP2
CD99		GLI2	KIR2DS4		KIT	PRKAG2	GGA3	LAMB3	SIGLEC1
PPP1CC		BMP8B	TRAF6		FZD3	ACSS1	SHFM1	LAMC1	TLR6
SPDYA		BMP5	MYL2		LEPR	PDGFRB	PSMC2	TIAM1	MAP3K5
PPP1CB		ZEB2	TRAF3		LEP	S1PR1	LOC399942	LAMA4	PTK2
SMAD3		E2F3	TOLLIP		PPP1CC	PDPK1	TUBA1B	LAMA5	CLDN20
SMAD4		DLG1	MYL5		WNT10A	CREB1	LEPR	TIMP3	PTGS2
SMAD1		BMP6	TAB2		WNT4	C9ORF103	NPC2	LAMB1	CLEC4M
SMAD2		E2F2	CCR2		SPDYA	AMT	LEP	PAK6	RAB7A
NBL1		CCNE2	MYL10		PPP1CB	AKT3	ULK2	MYC	JAK3
NCAM2		HMOX1	RAG2		ACTG1	GADD45G	SMAD3	LAMB4	JAK2
NCAM1		IRS1	FOXO3B		SMAD2	CPT1B	SMAD4	TBC1D4	NRAS
ITPR1		FZD2	FOXO3		MAPKAPK3	CHKB	SESN3	WTIP	THY1
ITPR2		HDAC1	RAG1		LTA	PYGB	SMAD1	TGFB2	LAMP1
PFN3		PARD3	PROS1		ITPR1	ETHE1	SMAD2	TGFB1	GNG13
CACNG2		MIR181B2	PROC		IL17A	MUT	PSMD11	PIP5K1C	TIAM1
CACNG3		MIR181C	LCP2		ITPR2	PYGM	NBL1	TAB2	NFKB2
PPP2R2A		MIR183	NFATC2		IL18	LOC651610	PSMD12	SMAD5	NFKB1
PPP2R2B		CALML6	NFATC1		TNFRSF9	ATM	PSMD13	TGFBR2	NFKBIB
GJA1		INADL	LCK		IL15RA	PYGL	CARD9	TGFBR1	CTNNA1
PPP2CB		MIR375	THBD		IL15	AKT1S1	LTA	SMAD9	NFKBIA
PPP2CA		HGF	CXCL10		CTNNB1	RBL2	LOC100133012	MET	CTLA4
PPP2R1A		PPP2R2D	PLCB1		CXCL13	PDE3B	LOC646096	CREB3L3	CSNK2A2
PPP2R1B		MPP5	KLRC3		LTB	MAPK12	CHEK2	LEFTY2	KRAS
LTBP1		TPM1	KLRD1		ACTB	PRKAB2	SGPP2	SMAD7	TRAF6
TJP1		STMN1	KLRC1		LTBR	PGP	ITPR1	SMAD6	MYL2
FZD10		TP73	KLRC2		FZD10	PRKAB1	SGMS2	TGFB3	SFTPA2
PTENP1		MIR423	KNG1		FZD5	CALML5	ITPR2	PLA2G4E	TRAF5
PTEN		PTGS2	CLDN10		GHR	ADCY2	KLF2	BOC	TRAF3
EXOC2		FLT1	CLDN8		PPP3CB	PRKAA2	PSMD4	SSX2IP	TRAF2
DOCK4		ABL1	CARD11		PTCH1	PRKAA1	EIF4E1B	MED13L	MYL5
PTCH1		FLT4	CLDN2		PPP3CA	GPT2	PSMD7	SUFU	MAG
PPP3CB		ABL2	CLDN6		MSN	SGK2	PSMD8	ACVR1C	STX18
PPP3CA		CYP24A1	LOC284620		CXCL9	BCL2L11	PPP2R2A	LAMC3	TAB2
MSN		NRAS	CLDN1		LIF	CCND1	PPP2R2B	TGIF1	CCR2
CLDN9		GNG13	RAET1G		GH1	PLK3	CXCL13	MYH6	LY6G5B
PPP2R2C		TIAM1	MBL2		GAB1	NLK	PPP2CB	COL21A1	CSNK2B
TLR4		CTGF	CXCR4		GH2	PDGFRA	LIPA	PLA2G12A	TUBA1C
LUM		TIMP3	ACTN4		TLR4	AGAP2	LTB	THBS3	VCAN
TLN1		NFKB1	ACTN1		LUM	PRKACA	PPP2CA	THBS2	NFASC
TLR2		CTNNA1	MAPK9		LIFR	HIBCH	PPP2R1A	PTPN1	TRAF1
ZAP70		PAK6	MAPK10		TLR2	PRKACB	PPP2R1B	RASGRP4	CREB3L3
NLGN3		MYC	MAPK11		PPP1R12C	PRKACG	LTBP1	ASAH2C	MYL10
CSDAP1		CSNK1D	KIR2DS5		FRS2	G6PC2	SUMF1	ASAH2	TCIRG1
CSDA		MIR326	KIR2DS1		PPP3R2	IRS2	LTBR	THBS1	FOXO3B
LAMA1		CSNK1E	KIR2DS3		PPP3CC	CYCS	PTENP1	PTPN2	FOXO3
RPS6KA6		MIR331	RASGRP2		PPP3R1	PRKAG1	PTEN	PPP1R12B	PIAS4
SFRP2		KRAS	LOC407835		ANK3	GAPDHS	NPC1	NOTCH4	THBS3
PPP3R2		MIR335	MAP2K2		ANK1	SOS2	NAIP	NOTCH3	THBS2
SFRP1		MIR330	KIR3DS1		ANK2	CHUK	PSME1	NOTCH2	LCK
PPP5C		WTIP	KIR3DL1		PDGFRB	RAF1	GHR	DUSP10	THBS1
PPP3CC		SKP1	MAP2K3		MMP2	EEF2	PSME2	NOTCH1	DAB2IP
PPP3R1		TGFB2	MAPK13		MMP9	RPIA	ACER1	SORBS1	CXCL10
CHAD		MIR449A	LOC727787		SLC9A1	SLC2A4	PPP3CB	MTOR	PLCB1
NOTUM		FBXW11	KIR3DL2		PDPK1	SLC2A2	PPP3CA	RGL1	TAB3
MAP2K4		TGFB1	MAP2K1		EDAR	SLC2A1	PPP2R5A	PRICKLE2	TUBA1A
TJP3		MIR342	MAP2K7		AKT3	SCD	CXCL9	KITLG	MPO
CREBBP		SMAD5	MAP2K6		VAV2	PHKG1	PPP2R3A	PPP1R12A	CLDN10
INVS		RBX1	KLKB1		ZFP91	PHGDH	PPP2R2C	CACNA2D3	CLDN8
ATF2		TGFBR2	ADCY4		CNTF	PHKG2	PPP2R5E	WNT3A	CARD11
PDGFRB		TGFBR1	CD99		ZFP91-CNTF	SOD2	GH1	NOS3	CLDN2
SV2C		SMAD9	CIITA		CNTFR	ALDOC	LIF	ARHGEF12	CLDN6
SIPA1L2		MET	ACTG1		MAPK12	RPTOR	TLR4	GFAP	LOC284620
MYH15		LEFTY2	KIR2DL1		VEGFA	SKP2	PPP2R5D	FZD3	CLDN1
PLA2G2E		SMAD7	KIR3DP1		VEGFC	RET	GH2	IRF9	NEO1
AGRN		SMAD6	KIR2DL2		VEGFB	SLC1A5	PPP2R5C	MAPK8IP3	TUBB4
PECAM1		TGFB3	IL18		CCR9	CAB39	LIFR	MAP3K6	TUBB2C
SERPINF1		PLA2G4E	KIR2DL4		RDX	PPP2R3B	PPP2R5B	MAP3K12	MC1R
PDPK1		RALB	CTNNA2		PXN	LOC100271831	SPTLC1	PIAS2	TUBB3
SELL		NF1	ITK		WNT5B	MAPK3	PSMA8	LEPR	MBL2
SELP		RALA	ULBP1		CCND1	SGK1	TLR2	LEP	CXCR4
DKK2		MIR345	ULBP2		PDGFA	SOS1	NAGA	PPP1CC	ACTN4
SPN		ACVR1C	CTNNB1		PDGFB	MAPK1	NAGLU	SPDYA	ACTN1
SELPLG		MIR373	KIR2DL3		PDGFRA	MAPK8	LAMA1	PPP1CB	M6PR
GADD45G		TGIF1	CXCL13		ACVR2B	CPT1A	PPT1	SMAD3	MAPK9
SPP1		PLA2G12A	MICB		ACVR2A	CPS1	PPP3R2	SMAD4	MRC1
DKK4		WWC1	TMED7		ACVR1B	S1PR4	PPP3CC	SMAD1	MAPK10
RBL1		NF2	TICAM2		PRKACA	EGFR	PPP3R1	SMAD2	MAPK11
NCK1		INHBE	ACTB		ACVR1	CDKN1B	CHAD	NBL1	RASGRP2
SOX17		RASGRP4	PPP3CB		PRKACB	EGF	MAP2K4	SGPP2	MAP2K3
CLDN18		THBS1	PPP3CA		PRKACG	CDKN1A	ATF6B	CPT1C	MAPK13
NLGN2		NOTCH4	MSN		PAK1	FBP2	CREBBP	ITPR1	NOS1
GP6		NOTCH3	CXCL9		NUDT16L1	CDKN2D	ATF2	ITPR2	MAP2K1
RELB		NOTCH2	CLDN9		TNFRSF13B	PPARA	CCL3L1	SGMS2	MAP2K7
MAPKAPK5		NOTCH1	NCF1C		EZR	CDKN2B	CCL3L3	EIF4E1B	MAP2K6
PFN4		INHBB	NCF1		LOC100129652	ARAF	AP1S3	CACNG2	ADCY4
RELA		INHBC	TLR3		IL25	PGAM4	PRKAG2	CACNG3	LOC399942
SELE		MTOR	TLR4		TFAP4	CREB3L2	PDGFRB	PPP2R2A	TUBA1B
RASAL3		INHBA	NOX3		SOS2	RAB2A	SV2C	PPP2R2B	CD99
PARD6B		RGL1	TAB1		LOC344593	ME2	AP3B1	CRB2	ACTG1
LOC729590		PDGFD	TLR1		LOC442113	PCCB	AGRN	PPP2CB	MPZ
BAMBI		KITLG	TLR2		PTPN11	CDK2	PDPK1	PPP2CA	LTA
TUBA8		MAPK9	FOS		RAF1	EHHADH	ATG7	PPP2R1A	NCAM2
CALML5		MAPK10	VAV3		PRKCB	PCCA	NOD2	PPP2R1B	NCAM1
RDX		WNT3A	LYN		PRKCA	PPARG	CREB1	LTBP1	CTNNA2
TAOK1		RIN1	SH2D1A		TNF	TP53	PRF1	TJP1	ITK
REL		RASGRP2	CDH5		TNFRSF6B	PC	EDAR	FZD10	IL15
CCND1		LOC407835	ZAP70		RTEL1	PIK3CA	RFWD2	PTENP1	CTNNB1
BCL2		MAP2K2	MLLT4		RHOA	PIK3CB	GADD45G	PTEN	CXCL13
PDGFA		MIR615	LOC730031		PTPN6	PIK3CD	SPP1	EXOC2	LTB
PDGFB		ABCC1	POLR2H		PRKCG	C12ORF5	SUGT1	GHR	TMED7
BCL2L1		MAP2K1	POLR2E		CCL28	FASLG	ATG4C	ACER1	TICAM2
PDGFRA		FZD3	POLR2F		RAC2	CAMKK1	RBL2	PTCH1	ACTB
YES1		LOC652799	PROCR		RAC3	PIK3CG	RBL1	PPP3CB	LTBR
ARHGAP5		LOC653882	PPP3R2		TNFRSF1B	PIK3R1	NCK1	PPP3CA	MMP14
PRKACA		KIT	PPP3CC		TNFRSF1A	PIK3R2	AP3M1	PPP2R5A	MSR1
PRKACB		MARCKS	PPP3R1		TNFRSF12A	CCNG2	GP6	MSN	MSN
PRKACG		PPP1CC	MAP2K4		CCR3		RELA	PPP2R3A	CXCL9
RALBP1		WNT10A	POLR2K		TNFRSF18		SELE	PPP2R2C	CLDN9
LOC100129773		SPDYA	POLR2L		CCR4		CHRM1	PPP2R5E	NCF1C
SP1		PPP1CB	MMP2		CCR5		LASS5	GH1	NCF1
CRK		WNT4	NCF4		CCR6		CHRM2	LIF	LIF
CRKL		SMAD3	NCF2		CCNL2		ATP6V1H	GH2	TLR4
CACYBP		SMAD4	MMP9		CCR7		LOC729590	TLR4	NOX3
LOC644877		ACTG1	PECAM1		CCR8		BAMBI	PPP2R5D	TAB1
TUBB6		SMAD1	VAV1		PPP1CA		PSME4	LUM	TLR2
RASGRP1		SMAD2	PDPK1		LOC100271831		TUBA8	PPP2R5C	FOS
SOS2		NBL1	VASP		MAPK3		PRKAB2	LIFR	VAV3
TFAP4		HMGA2	CR2		RAC1		BBC3	PPP2R5B	LYN
LOC344593		CTNNA2	GRK7		SOS1		AP3M2	SPTLC1	CD209
LOC442113		PARD6G	VCAM1		MAPK1		PRKAB1	TLR2	CDH5
PTPN11		PPP2R2A	PRF1		EGFR		ATG4B	SOCS7	ZAP70
CHUK		PPP2R2B	VAV2		CCR1		PRKAA2	AMOT	MLLT4
PRKCB		CTNNB1	AKT3		EGF		PRKAA1	ZAP70	LOC730031
TFDP1		CRB2	SPP1		CDKN1A		ATP6V0D2	CDON	NLGN3
SHC1		PPP2CB	CR1		CCL1		SGK2	LAMA1	CDH3
PRKCA		PPP2CA	NCK1		PDCD4		CCND1	RPS6KA6	CDH4
CASK		PPP2R1A	CLDN18		TNFRSF10A		BCL2A1	SFRP2	NLGN1
ARF6		PPP2R1B	TLR5		TNFRSF10D		BCL2	PPP3R2	CREB3L1
CGN		FST	TIRAP		TNFRSF11A		YWHAB	SFRP1	MAP2K4
MKNK1		LTBP1	MAPK12		ARAF		PDGFA	PPP5C	ATF6B
PRKD2		MMP16	RELA		TNFRSF10B		PDGFB	PPP3CC	ATF2
RHOA		ACTB	VCL		TNFRSF10C		BCL2L1	PPP3R1	MMP3
MPDZ		FZD10	GNG7		AMHR2		PDGFRA	CHAD	MMP2
NTNG2		FZD5	ZBP1		MRAS		DEGS1	NOTUM	NCF4
PRKD1		PTENP1	GNG5		AMH		CHEK1	MAP2K4	NCF2
PRKCI		PTEN	GNB3		PLA2G4D		SP1	ATF6B	MMP9
PRKCG		EXOC2	CLDN17		CRLF2		CRK	CREBBP	PECAM1
PTPN6		SPRY2	GNB2		PF4		CYCS	ATF2	VAV1
PRKCH		TCF7L1	GNG4		PF4V1		MOCS3	INVS	NOD2
PTPN7		MIR103-1AS	GNG3		TP53		PRKAG1	DGKZ	CREB1
PRKCD		PPP2R2C	DNAJC25-GNG10		TNFRSF21		CRKL	DGKE	PIKFYVE
PRKCE		GAB1	GNG10		PIK3CA		YWHAZ	DGKD	VASP
PTPRJ		ZAP70	DNAJC25		PIK3CB		YWHAH	PDGFRB	MARCO
PRKCQ		AMOT	GNG11		FAS		YWHAG	ZIC2	EDN1
TGFA		MLLT4	GNGT1		PIK3CD		LOC440917	PLA2G2E	GRK7
PTPRF		LOC730031	GNGT2		SHC2		YWHAE	SERPINF1	SELL
PLA2G12B		FOXO4	ADCY3		FASLG		PTPN13	PDPK1	SELP
DKK1		ANGPT2	ADCY2		PPBP		SOS2	CREB1	VCAM1
PRKCZ		ANGPT1	GNG2		TSLP		CHUK	DKK2	SPN
AREGB		MIR23B	RAET1L		PIK3CG		PRKCB	CPT2	SELPLG
AREG		MIR23A	ADCY1		PIK3R1		TFDP1	CPT1B	VAV2
LOC100271831		CREBBP	CCR9		CXCR7		SHC1	CHKB	AKT3
MAPK3		MIR27B	ADAR		PIK3R2		PRKCA	GADD45G	LOC651610
MAPK7		MIR27A	PXN				RIPK2	SPP1	ATM
PTPRB		MIR26A1	DDX58				LASS6	DKK4	CDH2
PRKG1		MIR25	ADA				TNFRSF6B	RBL2	CLDN18
SOS1		MIR26B	PAK7				RTEL1	RBL1	NLGN2
PRKG2		PDGFRB	RAPGEF3				FADD	NCK1	CNTN1
PTPRC		MIR26A2	ARHGAP5				RHOA	SOX17	RELB
MAPK1		PLA2G2E	PRKACA				PKN2	PIAS1	TIRAP
SMURF2		MMP9	PRKACB				PKN1	RELB	NTNG1
MAPK8		PLA2G2F	PRKACG				PRKCG	MAPKAPK5	COLEC12
LAMA3		AKT3	PAK1				CCL28	RELA	MAPK12
LAMA2		LOC651610	TNFRSF13B				PRKCE	RASAL3	RELA
ARAF		ATM	SERPINE1				RPRM	CHRM1	SELE
CLDN7		RBL1	SERPINB2				SOD2	LASS5	VCL
GNG12		MIR224	CRK				TGFA	CHRM2	GNG7
CLDN4		MIR223	EZR				RPTOR	PARD6B	GNG5
PTPRM		MIR222	LOC100129652				TNFRSF18	LOC729590	SEC61G
CLDN3		MIR221	CRKL				PRKCZ	BAMBI	GNB3
TEK		FGF20	CLDN25				AREGB	BBC3	CLDN17
COL29A1		SMURF1	RHOH				AREG	CALML5	GNB2
LRRC4		RELA	DCLRE1C				PPP2R3B	PRKAA2	GNG4
NLGN4X		GNG7	TLR8				LOC100271831	PRKAA1	ATP6V1H
FAS		GNG5	ACTN2				MAPK3	SGK2	GNG3
SHROOM2		SOCS1	ACTN3				SGK1	RDX	DNAJC25-GNG10
FASLG		RASAL3	RASGRP1				SGSH	TAOK1	GNG10
MYLK3		GNB3	SOS2				SOS1	REL	DNAJC25
SFRP5		GNB2	PAK3				MAPK1	CHKA	GNG11
SFRP4		GNG4	CHUK				SMURF2	CCND1	GNGT1
ANGPT4		PARD6B	LOC344593				MAPK8	BCL2	TUBB8
CALM3		GNG3	LOC442113				LAMA3	YWHAB	GNGT2
CALM2		LOC729590	PTPN11				LAMA2	PDGFA	TUBA8
CALM1		BAMBI	PRKCB				TNFRSF10A	PDGFB	ADCY3
STAT3		CHRD	RAF1				TNFRSF10D	BCL2L1	ADCY2
ELK4		DNAJC25-GNG10	PRKCA				TNFRSF11A	PDGFRA	GNG2
ELK1		GNG10	SHC1				ARAF	YES1	VEGFC
CD274		DNAJC25	TNF				TNFRSF10B	PRKACA	ADCY1
GNB4		GNG11	RFXAP				MLKL	DEGS1	ATP6V0D2
GDF7		GNGT1	RFX5				TNFRSF10C	PRKACB	CCR9
COMP		MIR30C1	CLDN24				THEM4	PRKACG	ATP6V1C2
ADRB1		MIR30B	PAK2				GNG12	RALBP1	PXN
FZD1		GNGT2	CLDN5				AP3S1	LOC100129773	DDX58
DIAPH1		MIR30D	FADD				AP1S1	SP1	RAPGEF3
FZD4		VEGFA	RHOA				CREB3L2	CRK	BCL2A1
FZD6		BBC3	POLR3K				CRLF2	CRKL	TUBB1
FZD7		CALML5	ESAM				SLC17A5	CACYBP	BCL2
SENP2		MIR30C2	PRKCG				TEK	LOC644877	BCL2L1
LEF1		MIR31	PTPN6				PF4	YWHAZ	ARHGAP5
FZD8		GNG2	CCL28				PF4V1	YWHAH	PRKACA
FZD9		VEGFC	PRKCD				COL29A1	YWHAG	PRKACB
SPHK1		MIR30E	SERPINA1				FAS	LOC440917	LRRC4C
RRAS2		VEGFB	TFPI				FASLG	YWHAE	PRKACG
LOC100133211		MIR32	RAC2				TSLP	RASGRP1	PAK1
ITGA11		RDX	SH3BP2				CXCR7	SOX2	SEC61A2
PGF		BCL2L11	PRKCQ				TRIP6	SOS2	CRK
CTTN		REL	RAC3				ANGPT4	TFAP4	EZR
WNT9B		WNT5B	POLR3H				STAT3	LOC344593	LOC100129652
WNT9A		CCND1	CCR3				AP3B2	LOC442113	CRKL
MYL7		YAP1	CCR4				ELK1	PTPN11	TUBB6
DAAM2		PAK7	CCR5				CCL2	CHUK	CLDN25
TBL1XR1		BCL2	PRKCZ				GNB4	PRKCB	RHOH
MAP3K8		PDGFA	CCR6				POMP	TFDP1	PVR
VANGL2		YWHAB	CCNL2				GDF7	SHC1	ERC1
WNT2B		FGF22	TYROBP				CCL3	PRKCA	PVRL2
WNT11		BCL2L2	CCR7				COMP	ARF6	ACTN2
AKT1		PDGFB	CCR8				MFSD8	LASS6	ACTN3
AKT2		PDGFRA	LOC100271831				CCL5	SLC27A1	PVRL1
WNT10B		BCL2L1	MAPK3				NAGPA	MKNK1	SOS2
PLA1A		ACVR2B	RAC1				CCL4	RHOA	CHUK
ARRB2		ACVR2A	SOS1				CCL13	PKN2	LOC344593
ARRB1		ACVR1B	PTPRC				CCL11	CISH	LOC442113
MYL12A		PRKACA	MAPK1				CCL8	PRKCI	PTPN11
DUSP16		ACVR1	MAPK8				CCL7	PKN1	PRKCB
BRAP		PRKACB	TEC				FCER1G	PTPN6	RAF1
AXIN1		PAK1	CCR1				MS4A2	PRKCG	PRKCA
AXIN2		PRKACG	CCL1				TNFRSF17	PTPN7	SHC1
LPAR4		RALBP1	TNFRSF10A				SPHK1	PRKCE	TRIM25
STAT5B		LOC100129773	TNFRSF10D				FCER1A	PTPRJ	TNF
STAT5A		IRS2	IL33				ITGA11	TGFA	CLDN24
PFN1		DDIT4	ARAF				SGPL1	PTPRF	CLDN5
JAM2		SP1	TNFRSF10B				BCL6	LATS2	CEBPB
PFN2		SERPINE1	TNFRSF10C				PGF	PLA2G12B	FADD
PIK3R5		VIM	CLDN7				BCL3	DKK1	RHOA
CAPN2		CRK	POLR3GL				TNFSF11	RPTOR	NTNG2
GJD2		MIR28	GNG12				CCL14	PRKCZ	ESAM
MIR10A		EZR	CLDN4				CCL15	AREGB	PRKCG
TUBB2B		LOC100129652	CLDN3				MAP3K8	AREG	CCL28
ALCAM		CRKL	MAVS				LAMP3	PPP2R3B	PRKCD
LOC100133690		MIR29B1	CPB2				AKT1	LOC100271831	RAC2
MIR10B		PLA2G2D	PF4				AKT2	MAPK3	PRKCQ
PLCE1		MIR29A	CD244				TCL1A	SGK1	PTPRF
ID3		YWHAZ	CDK4				CCL18	MAPK7	TFRC
BDNF		YWHAH	PF4V1				LRDD	PTPRB	TNFRSF1B
CACNG5		MIR29C	PIK3CA				AP1B1	SOS1	TNFRSF1A
CACNG4		YWHAG	PIK3CB				CCL17	MAPK1	CCR3
CAMK2A		MIR29B2	FAS				CCL20	TEAD1	CCR4
CAMK2B		LOC440917	PIK3CD				CCL19	TEAD4	CCR5
CAMK2D		YWHAE	FASLG				AP1G1	SMURF2	PRKCZ
CAMK2G		MIR30A	SHC2				CCL21	TEAD3	CCR6
CLDN23		RASGRP1	PPBP				CCL23	MAPK8	CCNL2
WNT16		SOX2	PIK3CG				LPAR4	CPT1A	CCR7
CALML3		SOS2	PIK3R1				CCL22	LAMA3	CCR8
SDC2		PAK3	PIK3R2				ENDOG	LAMA2	TNFAIP3
SDC4		CHUK					STAT5B	AQP7	LOC100271831
SDC1		LOC344593					STAT5A	ARAF	MAPK3
KSR1		LOC442113					CCL16	THEM4	RAB5C
CASP9		PTPN11					PIK3R5	GNG12	RAC1
ADCY8		PRKCB					CAPN2	PTPRM	SOS1
HLA-DOA		RAF1					IL13RA1	CREB3L2	PTPRC
HLA-DOB		SOX4					TNFRSF13C	CRLF2	MAPK1
ADCY9		TFDP1					CAPN1	TEK	PVRL3
HPSE		SHC1					CCL24	COL29A1	MAPK8
ADCY6		PRKCA					HGSNAT	FAS	SFTPD
ADCY7		TNF					CX3CL1	FASLG	CCR1
SIPA1L1		ARF6					XCL1	TSLP	CCL1
ADCY5		PAK2					AGA	SFRP5	TNFRSF11A
FGF9		RHOA					CXCL5	SFRP4	MLKL
ICAM2		PLA2G3					CXCL11	CALM3	CLDN7
VWF		MIR99A					CXCL6	CALM2	GNG12
FGF8		PRKCI					ID3	CALM1	RAB5B
ICAM3		PRKCG					ARSA	ANGPT4	PIK3C3
FGF7		SERPINB5					NLRC4	STAT3	PTPRM
LOC100132771		MIR9-3					CCL25	STAT4	CLDN4
FGF7P2		PRKCE					BDKRB2	ELK4	CLDN3
FGF6		MIR96					ARSB	STAT1	RAB5A
WAS		EFNA4					CXCR3	SCRIB	CREB3L2
FGF5		EFNA3					CAMK2A	ELK1	PF4
SNAI2		RAC2					CAMK2B	STAT2	PF4V1
IBSP		EFNA5					CAMK2D	GNB4	LRRC4
ICAM1		RAC3					CAMK2G	GDF7	CDH15
VTN		LATS2					SETD7	SLC44A5	LRRC4B
FGF3		PLA2G12B					CLCF1	COMP	NLGN4X
FGF4		WWTR1					ASAH1	FZD1	PIK3CA
FGF1		RPTOR					CXCL12	FZD4	PIK3CB
FGF2		EFNA2					CCR10	FZD6	FAS
HLA-C		EFNA1					JAG1	FZD7	PIK3CD
HLA-B		PRKCZ					XCR1	SENP2	TIGIT
FGF21		MIR92A2					SDC4	LEF1	SHC2
HLA-DMB		AREGB					SDC1	FZD8	PPBP
HLA-DMA		AREG					CASP10	FZD9	PIK3CG
GNG8		LOC645323					CASP9	FCER1G	PIK3R1
HLA-A		MIR9-2					CASP8	MS4A2	PIK3R2
FGFR2		MIR92A1					CASP7	SPHK1
ID1		PPP1CA					FGF9	FCER1A
RASA2		MIR7-3					VWF	RRAS2
MAPK8IP2		LOC100271831					TSC2	LOC100133211
RASGRF1		MAPK3					FGF8	ITGA11
ID2		MIR9-1					CCL27	SGPL1
RASGRF2		MIR7-1					FGF7	PGF
FGFR4		MAPK7					LOC100132771	CTTN
SYNGAP1		MIR7-2					FGF7P2	WNT9B
SOST		RAB5C					FGF6	WNT9A
CASP3		MIR34B					FGF5	DAAM2
FGFR3		RAC1					CAT	TBL1XR1
FGFR1		MIR34C					IBSP	MAP3K8
RASA1		LOC728196					PGAM5	VANGL2
RPS6KA2		SOS1					ICAM1	WNT2B
LOC100127984		MIR34A					VTN	AKT1
FGF14		MAPK1					PSMF1	WNT11
RPS6KA3		TEAD1					RCHY1	AKT2
RAPGEF1		SMURF2					FGF3	WNT10B
CD226		TEAD4					FGF4	TCL1A
RPS6KB1		TEAD3					CFLAR	ACOX2
FGF17		MAPK8					FGF1	PLA1A
FGF16		RASA4B					FGF2	ACOX3
RPS6KB2		EGFR					FGF21	ARRB2
FGF10		TNR					GNG8	ARRB1
SHROOM1		CDKN2A					LMNB2	DUSP16
FGF11		CDKN1B					FGFR2	BRAP
GRB2		CDKN1A					ID1	AXIN1
IQGAP1		EGF					CASP5	AXIN2
FGF12		TNXB					ID2	LPAR4
SKAP1		TNXA					FGFR4	STAT5B
FGF13		PDCD4					CASP6	STAT5A
TWIST2		CDKN2B					CASP1	STAT6
PLA2G4F		SLC7A1					CASP3	PFKP
CNTNAP2		GNG12					ATP6V0A2	IL13RA2
RPS6P25		RAB5B					FGFR3	PIK3R5
RPS6P1		AMHR2					CASP2	IL13RA1
RPS6		MRAS					FGFR1	MIR10A
RPS6KA1		AMH					FGF14	MIR10B
ADORA2A		RAB5A					RPS6KB1	AFP
WNT1		RGL2					FGF17	PLCE1
HPSE2		PLA2G4D					CXCR6	ID3
LOC100131909		EPHA2					FGF16	BDNF
ADORA2B		FSCN1					RPS6KB2	BDKRB2
NEGR1		TEK					FGF10	CACNG5
WNT7A		TP53BP2					TSC1	CACNG4
RNASEN		TP53					RELT	CAMK2A
WNT7B		RASA3					FGF11	CAMK2B
CBLB		PIK3CA					GRB2	KAT2B
WNT8A		PIK3CB					FGF12	CAMK2D
CBL		PIM1					FGF13	CAMK2G
WNT8B		CDK6					PLA2G4F	WNT16
LAT		PIK3CD					RPS6P25	CALML3
WNT2		PLA2G2C					RPS6P1	ASAH1
WNT3		FASLG					RPS6	SDC2
HTR7		SHC2					ADORA1	SDC4
WNT5A		CCNG1					OSM	SDC1
WNT6		PIK3CG					CBLB	KSR1
HTR2A		MIR483					CBL	CASP9
MKNK2		PIK3R1					STK11	HPSE
CLDN11		PIK3R2					HTRA2	FGF9
FGF18							LOC645978	VWF
HTR2C							ACER2	TSC2
HTR2B							FGF18	FGF8
STK4							EIF4E2	FGF7
TUBA4A							STK4	LOC100132771
STK3							TUBA4A	FGF7P2
RGS14							PYCARD	FGF6
LEFTY1							LAPTM4B	HDAC3
MAPK8IP1							LEFTY1	SNAI2
ROCK2							NAPSA	FGF5
RAP1A							IL22RA1	WAS
RAP1B							ATG5	IBSP
RAP1GAP							ROCK2	VTN
TNC							PARP4	JUB
RUVBL1							TNC	SOCS2
CAV2							LPAR3	FGF3
LPAR3							PLA2G4C	FGF4
CAV1							HYAL1	FGF1
PLA2G4C							IL18RAP	FGF2
FER							IL17RA	PTCH2
RALGDS							ATF4	FGF21
CAV3							ATF4C	GNG8
TBK1							TST	SLC5A7
CLDN14							ATG4D	SAV1
RASAL2							ADORA3	FGFR2
CTNNA3							PARP1	ID1
GPC4							IL18R1	RASA2
ATF4							HOMER2	MAPK8IP2
ATF4C							HOMER3	RASGRF1
TWIST1							ATG4A	ID2
BTC							HOMER1	RASGRF2
NOG							TNFSF4	FGFR4
HSPG2							BTC	SYNGAP1
ESR1							TNFRSF4	SOST
ICOSLG							NOG	CASP3
TGIF2							HSPG2	FGFR3
SH2D2A							GABARAPL3	FGFR1
KRIT1							GABARAPL1	RASA1
ICOS							EIF2AK3	RPS6KA2
MYH14							TGIF2	LOC100127984
RASA4P							CTSZ	FGF14
RASA4							SH2D2A	RPS6KA3
WASF2							CX3CR1	RPS6KB1
PLA2G6							CTSW	FGF17
CADM1							G6PC3	FGF16
TUBB2A							CTSS	RPS6KB2
PLA2G10							FOXG1	FGF10
HLA-G							LPAR6	TSC1
MAP4K4							MDM4	GRB2
RPS6KA5							RPS6KA5	FGF11
BRAF							BRAF	ANGPTL4
MDM2							BRCA1	IQGAP1
JMJD7-PLA2G4B							MDM2	FGF12
JMJD7							JMJD7-PLA2G4B	FGF13
PLA2G4B							JMJD7	TWIST2
IKBKB							PLA2G4B	PLA2G4F
CACNA2D2							IKBKB	RPS6P25
IL1A							IL1A	RPS6P1
DOCK1							SHC4	RPS6
SHC4							CTSL1	PLCD4
CTSL1							CTSK	RPS6KA1
NODAL							GNPTAB	ADORA1
TLN2							CTSH	WNT1
HLA-DRB4							CTSG	HPSE2
HLA-DRB1							CTSE	WNT7A
LLGL1							SESN2	RNASEN
HLA-DRB5							PSTPIP1	WNT7B
MIR21							CTSO	OSM
LLGL2							NFS1	CBLB
HLA-DRB3							NODAL	WNT8A
PDGFC							IL24	CBL
HSPA8							CTSL2	STK11
SV2A							GBA	WNT8B
KSR2							PDGFC	LAT
HSPB1							TNFSF13B	WNT2
HSPBL2							GNA13	PPAP2B
HSPB2							SV2A	WNT3
MAGI1							HSPB1	HTR7
CNKSR3							HSPBL2	WNT5A
EREG							EREG	LOC645978
VAPA							RIPK3	ACER2
NGF							HSP90AA2	WNT6
CTNND1							HSP90AA1	MKNK2
MAP3K14							NGF	FGF18
NGFR							MAP3K14	EIF4E2
HLA-F							NGFR	STK4
HLA-E							SOCS3	PFKFB2
SYMPK							CTSD	STK3
HLA-DPA1							CTSB	LEFTY1
GDF6							GDF6	MAPK8IP1
HLA-DPB1							ERN1	IL22RA1
LOC100133678							SPTLC3	ROCK2
HLA-DQA1							SGPP1	RAP1A
HLA-DQA2							GNB5	RAP1B
HLA-DQB1							FIGF	TNC
LOC100133583							HSP90AB1	SLC27A6
GNB5							DNASE2	RUVBL1
FIGF							MCL1	CAV2
CLDN16							TCL1B	LPAR3
MADCAM1							CCND2	CAV1
CCND2							CCNB1	PLA2G4C
HLA-DRA							CCNE1	FER
CCND3							CCND3	RALGDS
GP1BA							GP1BA	CAV3
GP1BB							GP1BB	TBK1
SRF							TNFSF15	PPAP2A
GPC1							SFN	PPAP2C
GP9							EPO	RASAL2
MYL9							IL9R	CTNNA3
TJP2							CXCR5	GPC4
GP5							GP9	ATF4
F2RL3							GP5	ATF4C
MYLPF							NOD1	PCYT1B
RAPGEF2							DEGS2	ADORA3
LOC100133567							PSME3	IL27RA
HSPA1L							CXCR2	TWIST1
ERBB4							CXCR1	BTC
HSPA1A							IL9	NOG
HSPA1B							IL7R	HSPG2
IL12B							IL8	ESR1
ERBB2							IL12RB1	TYK2
ERBB3							ERBB4	KAT2A
HSPA2							IL12B	TGIF2
KDR							ERBB2	SH2D2A
CLDN22							IL13	G6PC3
TCF7							ERBB3	SOCS5
HSPA6							IL12RB2	ACSL6
HSPA7							BID	RASA4P
CACNA2D4							IL11RA	RASA4
MPZL1							IL12A	LPAR6
FGF19							KDR	ME1
TCF7L2							S1PR2	LOC441089
NRG4							LASS3	MED27
EP300							IL26	LOC100134189
MAPKAPK2							EDA2R	WASF2
SPHK2							IL10	PLA2G6
SPTAN1							IL10RA	PLA2G10
SDC3							FGF19	MAP4K4
TBL1X							IL10RB	RPS6KA5
IL1B							IL11	BRAF
EXOC4							EPOR	BRCA1
IL1R1							NRG4	MDM2
CNTN2							IL3RA	JMJD7-PLA2G4B
BMPR2							FOXO6	JMJD7
LOC643778							IL3	PLA2G4B
BMPR1A							EP300	IKBKB
SRC							IL2RG	CACNA2D2
BMPR1B							IL2RB	IL1A
BMP4							FBXO32	MED17
BMP2							MAPKAPK2	SHC4
BMP7							SPHK2	PIP5K1A
BMP8B							BNIP3	PIP5K1B
BMP5							SPTA1	CTSL1
BMP6							SPTAN1	FRMD1
HMMR							IL1RAP	IHH
NR4A1							IL1B	SLC27A2
MYLK4							IL1R1	NODAL
NANOG							IL20RB	IL24
NANOGP8							IL2RA	MIR21
RAPGEF4							IL2	LLGL1
EPB41L2							IL20RA	LLGL2
EPB41L1							BMPR2	PDGFC
EPB41							LOC643778	GNA13
PARD3							BMPR1A	HSPA8
CALML6							SRC	GATA4
TUBA3E							IL6R	KSR2
INADL							BMPR1B	HSPB1
JAM3							IL6ST	HSPBL2
FN1							IFNK	HSPB2
PPP2R2D							IL7	EREG
VANGL1							BMP4	FHL1
CADM3							BMP2	HSP90AA2
ZAK							IL28B	HSP90AA1
EIF4B							BMP7	CTNND1
EIF4BP7							IL29	NGF
EIF4EBP1							BMP8B	MOBKL1A
PARVG							BMP5	MAP3K14
CTBP2							BMP6	NGFR
CTBP1							HMMR	SOCS3
FLT1							IL28A	CTSD
FLT4							NR4A1	GDF6
ABL1							CTU1	SPTLC3
ABL2							IL4	SGPP1
RELN							IL4R	GNB5
GNG13							IL5	FIGF
NFKB2							IL5RA	HSP90AB1
NFKB1							IL6	MCL1
EXOC3							TUBA3E	SCD5
CTNNA1							FN1	TCL1B
CTLA4							PPP2R2D	CCND2
CSNK2A2							CREB3	DGKK
CSNK1D							LGMN	CCNE1
NFATC4							EIF4B	CCND3
CSNK1A1							EIF4BP7	SRF
FLNC							EIF4E	MED13
CSNK1E							LOC100131565	MED12
NFATC3							LOC100131693	EPO
FLNA							EIF4EBP1	IL9R
KRAS							TP73	GPC1
FLNB							MTCP1NB	MED14
SKP1							MTCP1	FADS2
TRAF6							IL23A	DEGS2
FBXW11							CTF1	IL9
SHROOM3							FLT1	RAPGEF2
TRAF2							FLT3	LOC100133567
TUBA1C							FLT3LG	IL7R
RBX1							FLT4	GAS1
LY6G5B							ABL1	HSPA1L
CSNK2B							ABL2	IL12RB1
VCAN							RELN	ERBB4
MYL10							ATG16L2	HSPA1A
RALB							GNG13	HSPA1B
NF1							NFKB1	IL12B
RALA							NFKBIB	ERBB2
ASH1L							NFKBIA	IL13
DAAM1							GABARAP	ERBB3
INHBE							PRLR	IL12RB2
NFATC2							CSNK1E	HSPA2
NFATC1							CTSC	GPCPD1
MAX							KRAS	IL11RA
PLCB1							PRL	BID
TUBA1A							SKP1	IL12A
INHBB							TRAF6	KDR
INHBC							TRAF5	S1PR2
INHBA							ABCA2	LASS3
NEO1							TRAF3	TCF7
PDGFD							TRAF2	HSPA6
PORCN							GABARAPL2	HSPA7
ACTN4							TUBA1C	CACNA2D4
IL1R2							RBX1	IL10
ACTN1							TRAF1	IL10RA
MAPK9							HSP90B1	FGF19
MAPK10							FOXO1	IL10RB
RIN1							FOXO3B	IL11
MAPK11							FOXO3	EPOR
LOC407835							ATG10	TCF7L2
MAP2K2							RAG2	NRG4
RASGRP2							RAG1	DLG3
MAP2K3							PSMD14	DLG2
MAPK13							OSMR	IL3RA
MAP2K1							GALNS	IL3
MAP2K7							INHBE	DLG4
LOC652799							PLEKHO2	EP300
LOC653882							NFATC2	IL2RG
KIT							DAB2IP	IL2RB
MAP2K5							PHLPP1	MAPKAPK2
CXXC4							CXCL10	SPHK2
ILK							PLCB1	TBL1X
MAP2K6							TUBA1A	IL1B
ADCY4							MPL	IL1R1
WNT4							GALC	IL20RB
WNT10A							GNPTG	IL2RA
ACTG1							INHBB	IL2
MPZ							INHBC	IL20RA
MAPKAPK3							NEU1	BMPR2
FPR1							IL28RA	LOC643778
CTNNA2							INHBA	BMPR1A
PARD6G							PDGFD	SRC
TJAP1							CXCR4	IL6R
CTNNB1							IL1R2	BMPR1B
FST							PHLPP2	IL6ST
ACTB							S1PR5	DIO2
MOS							MAPK9	IFNK
FZD5							MAPK10	DIO1
MAPT							MAPK11	IL7
TCF7L1							LOC407835	HMGCS2
COL9A2							MAP2K2	BMP4
COL9A3							MAP2K3	DIO3
BAIAP2							ABCC1	BMP2
GAB1							MAPK13	IL28B
TAB1							MAP2K1	BMP7
ACP1							MAP2K7	IL29
FOS							AP3S2	BMP8B
PPP1R12C							LOC652799	BMP5
VAV3							LOC653882	DLG1
COL6A2							KIT	BMP6
CDH5							PRKAG3	IL28A
COL6A3							MAP2K6	NR4A1
MLLT4							PERP	NANOG
LOC730031							MPST	NANOGP8
FRS2							ACTG1	IL4
CDH3							MAPKAPK3	IL4R
FOXO4							IL17A	IL5
CDH4							MANBA	PARD3
COL6A1							MAN2B1	IL5RA
NLGN1							IL18	IL6
APBB1IP							TNFRSF9	CALML6
COL9A1							IL15RA	INADL
ANGPT2							CTNS	FN1
ANGPT1							IL15	PPP2R2D
ANK3							FST	ACADL
ANK1							ACTB	ACADM
ANK2							USP7	VANGL1
COL4A6							MCOLN1	ZAK
COL4A5							MMP14	CREB3
COL2A1							SGMS1	EIF4B
MMP2							COL9A2	EIF4BP7
COL4A1							COL9A3	EIF4E
COL4A2							GAB1	LOC100131565
MMP9							MOCS2	LOC100131693
SLC9A1							TAB1	EIF4EBP1
COL4A3							ACP2	TP73
MMP7							ACP5	MTCP1NB
COL4A4							FOS	MTCP1
VAV1							GAA	CTBP2
LPAR1							MOCS1	CTBP1
VASP							COL6A2	IL23A
PLA2G2F							COL6A3	CTF1
P2RY1							FOXO4	APOA5
VCAM1							COL6A1	FLT1
VAV2							COL9A1	FLT4
AKT3							CRTC2	ABL1
COL1A1							GGA1	ABL2
WASF3							SLC11A1	RELN
COL1A2							BECN1	ACAA1
CDH2							FBXO25	GNG13
FGF20							ANGPT2	CTGF
CNTN1							ANGPT1	NFKB2
SMURF1							CREB3L1	NFKB1
NTNG1							COL4A6	CTNNA1
MAPK12							COL4A5	CSNK1G3
VCL							LAPTM5	CSNK2A2
GNG7							COL2A1	CSNK1D
GNG5							MMP3	NFATC4
GNB3							COL4A1	PRLR
GNB2							COL4A2	CSNK1A1
CLDN17							MMP9	FLNC
GNG4							ATG16L1	CSNK1G2
GNG3							CTU2	CSNK1E
DNAJC25-GNG10							COL4A3	NFATC3
GNG10							COL4A4	FLNA
DNAJC25							S1PR1	FLNB
CHRD							LPAR1	KRAS
GNG11							S1PR3	PRL
GNGT1							EDN1	SKP1
MAPKSP1							VCAM1	TRAF6
GNGT2							MLST8	FBXW11
TUBB8							AKT3	TRAF2
VEGFA							LOC651610	RBX1
ADCY3							ATM	LY6G5B
VEGFC							COL1A1	CSNK2B
GNG2							COL1A2	HSP90B1
ADCY2							GGA2	RALB
VEGFB							FGF20	NF1
ADCY1							SMURF1	RALA
SIPA1L3							ZFP91	FOXO1
CNR1							CNTF	FOXO3B
PXN							ZFP91-CNTF	FOXO3
ARAP3							42617	PIAS4
WNT5B							CNTFR	DAAM1
PAK7							MAPK12	NCOA2
TUBB1							ULK3	OSMR
RAPGEF3							GNG7	PLCZ1
NLK							GNG5	WWC1
FGF22							GNB3	NF2
ACVR2B							GNB2	INHBE
ACVR2A							GNG4	NFATC2
ACVR1B							GNG3	NFATC1
ACVR1							DNAJC25-GNG10	PHLPP1
LRRC4C							GNG10	MAX
PAK1							DNAJC25	PLCB1
NUDT16L1							CHRD	MPL
EZR							GNG11	INHBB
LOC100129652							GNGT1	INHBC
CHD8							GNGT2	IL28RA
FRAT1							DNASE2B	INHBA
PLA2G2D							VEGFA	PDGFD
CLDN25							VEGFC	PORCN
PVR							GNG2	ACTN4
ACTN2							VEGFB	IL1R2
PVRL2							CCR9	ACTN1
ACTN3							GTSE1	DGKH
PVRL1							BCL2L11	PHLPP2
PAK3							PXN	RCAN2
CSNK1A1L							PSMB10	S1PR5
RAF1							PSMB9	MAPK9
TNF							NLRP3	MAPK10
RAPGEF6							PAK7	NCOR1
CLDN24							PLK3	RIN1
PAK2							NLRP1	MAPK11
CLDN5							NLK	LOC407835
PLA2G3							FGF22	MAP2K2
ESAM							KIAA0831	RASGRP2
EFNA4							ACVR2B	MAP2K3
EFNA3							AGAP2	ABCC1
RAC2							ACVR2A	MAPK13
EFNA5							ACVR1B	MAP2K1
RAC3							ACVR1	MAP2K7
MYLK2							PAK1	LOC652799
LPAR5							GNS	LOC653882
EFNA2							G6PC2	KIT
EFNA1							IRS2	MAP2K5
TNFRSF1A							TNFRSF13B	CXXC4
PPM1A							DDIT4	ILK
PPM1B							SERPINE1	MAP2K6
PPP1CA							IL25	WNT4
RAB5C							ATG3	WNT10A
RAC1							PAK3	ACTG1
PVRL3							RAF1	LYPLA1
RAB13							TRMU	MAPKAPK3
LOC100131294							TNF	IL15RA
MAP4K2							PSMA1	CTNNA2
RASA4B							SLC2A4	IL15
EGFR							PAK2	PARD6G
PSEN1							PSMA5	CTNNB1
TNR							PSMA4	FST
CDKN1B							PSMA3	ACTB
CDKN1A							PSMA2	MED12L
EGF							CEBPB	SGMS1
PDCD4							RRM2B	MOS
TNXB							SERPINB5	FZD5
TNXA							EFNA4	MAPT
CDKN2B							EFNA3	TCF7L1
TAOK3							RAC2	COL9A2
RAB5B							EFNA5	COL9A3
MRAS							RAC3	STAM2
AMHR2							PSMB3	GAB1
RAB5A							PSMB2	BAIAP2
AMH							PSMB5	ACOX1
RAB3B							PSMB4	TAB1
RGL2							TNFRSF1B	ACP1
PLA2G4D							LPAR5	FOS
MYH7B							PSMB7	PPP1R12C
EPHA2							PSMB6	COL6A2
CDK4							SKP2	COL6A3
CDH15							EFNA2	MLLT4
PPARD							EFNA1	LOC730031
LRRC4B							PSMB8	FRS2
RASA3							TNFRSF1A	FOXO4
TP53							PSMA6	COL6A1
PIK3CA							CCR3	COL9A1
PIK3CB							TNFRSF12A	CRTC2
PIK3CD							PSMA7	PIAS3
PLA2G2C							CCR4	FXYD2
TIGIT							PSMB1	ANGPT2
SHC2							CCR5	ANGPT1
COL6A6							CCR6	ATP2A2
PIK3CG							CCNL2	ANK3
PIK3R1							CCR7	CREB3L1
PIK3R2							CCR8	ANK1
							TNFAIP3	ANK2
							RAC1	ATP1B2
							S1PR4	ATP1B3
							EGFR	ATP1A4
							CDKN2A	ATP1B1
							TNR	COL4A6
							CCR1	COL4A5
							CDKN1B	COL2A1
							CDKN1A	MMP2
							PSAP	COL4A1
							EGF	MMP1
							CCL1	COL4A2
							TNXB	MMP9
							TNXA	COL4A3
							CDKN2D	SLC9A1
							CDKN2B	MMP7
							PIK3C3	COL4A4
							AMHR2	S1PR1
							AMH	LPAR1
							PLA2G4D	ATP1A1
							PIK3AP1	S1PR3
							EPHA2	ATP1A3
							CDK2	ATP1A2
							SESN1	PLA2G2F
							CDK4	MLST8
							EIF2S1	VAV2
							TP53	AKT3
							TNFRSF21	COL1A1
							PIK3CA	WASF3
							PIK3CB	COL1A2
							CDK6	SLC44A2
							CTSA	FGF20
							PIK3CD	SLC16A10
							CLTA	SMURF1
							SHC2	ZFP91
							CLTB	CNTF
							PPBP	ZFP91-CNTF
							CLTC	RAB23
							COL6A6	CNTFR
							CCNG1	MAPK12
							PIK3CG	GNG7
							PIK3R1	VCL
							PIK3R2	GNG5
							CCNG2	SOCS1
								GNB3
								GNB2
								GNG4
								GNG3
								DNAJC25-GNG10
								GNG10
								DNAJC25
								CHRD
								GNG11
								NCOA1
								GNGT1
								MAPKSP1
								GNGT2
								VEGFA
								SLC22A1
								VEGFC
								GNG2
								VEGFB
								SLC22A4
								SLC22A5
								SLC22A3
								SLC22A2
								BCL2L11
								PXN
								PAK7
								YAP1
								WNT5B
								SLC16A2
								NLK
								FGF22
								ACVR2B
								ACSL5
								ACVR2A
								ACVR1B
								ACVR1
								PAK1
								G6PC2
								NUDT16L1
								DDIT4
								SERPINE1
								EZR
								LOC100129652
								MED16
								CHD8
								FRAT1
								PLA2G2D
								ACTN2
								PVRL2
								ACTN3
								PVRL1
								PAK3
								CSNK1A1L
								RAF1
								TNF
								PAK2
								SLC2A1
								SCD
								PLA2G3
								EFNA4
								EFNA3
								RAC2
								EFNA5
								RAC3
								WWTR1
								LPAR5
								EFNA2
								EFNA1
								TNFRSF1A
								PPM1A
								PPM1B
								PPP1CA
								RAB5C
								RAC1
								PVRL3
								SIN3A
								MAP4K2
								RASA4B
								S1PR4
								EGFR
								PSEN1
								SCP2
								TNR
								CDKN1B
								CDKN1A
								EGF
								PDCD4
								TNXB
								TNXA
								PPARA
								CDKN2B
								TAOK3
								RAB5B
								MRAS
								AMHR2
								RAB5A
								AMH
								RGL2
								PLA2G4D
								PIK3AP1
								EPHA2
								CDK2
								EHHADH
								CDK4
								PPARG
								TP53BP2
								PPARD
								SOCS4
								RASA3
								TP53
								MED1
								PIK3CA
								PIK3CB
								PIM1
								CDK6
								PIK3CD
								PLA2G2C
								SHC2
								COL6A6
								PIK3CG
								PIK3R1
								PIK3R2

## Sheet: Supp_table_3_VAF_cancer_type
cancer_type	angiogenesis	death	growth	immortality	immune	inflammation	metabolism	metastasis	mutations	proliferation
ACC	0.376546	0.372314	0.363469	0.352292	0.400756	0.403386	0.382159	0.41585	0.375127	0.417241
BRCA	0.265708	0.267211	0.265301	0.260792	0.296061	0.29405	0.295765	0.316979	0.268107	0.307573
BLCA	0.298611	0.30518	0.293486	0.290752	0.323684	0.318002	0.312192	0.328944	0.303101	0.335775
DLBC	0.302092	0.293358	0.292382	0.292902	0.303209	0.318918	0.308679	0.345566	0.299657	0.346721
COAD	0.291848	0.291876	0.287957	0.288797	0.307794	0.307176	0.301196	0.322029	0.293971	0.305492
ESCA	0.315802	0.31834	0.293017	0.287871	0.3431	0.333532	0.342999	0.368941	0.31613	0.375853
GBM	0.269904	0.269776	0.24822	0.249389	0.299481	0.292625	0.281058	0.291996	0.270716	0.321508
HNSC	0.266192	0.266114	0.252648	0.25116	0.282401	0.27837	0.28144	0.289052	0.266695	0.302198
KIRP	0.346218	0.342137	0.340035	0.336829	0.343896	0.359551	0.341628	0.344216	0.346622	0.368433
KIRC	0.247768	0.252681	0.242093	0.251556	0.258147	0.251963	0.256908	0.262472	0.248983	0.257165
KICH	0.343002	0.365943	0.316572	0.285898	0.391068	0.364396	0.379989	0.420467	0.345383	0.486504
LIHC	0.332415	0.332561	0.332134	0.336184	0.35126	0.340895	0.346071	0.358475	0.336334	0.374215
LGG	0.323984	0.337566	0.29015	0.284719	0.377041	0.374422	0.383204	0.423543	0.332078	0.43571
LUAD	0.261587	0.260315	0.259596	0.255286	0.27238	0.265808	0.272852	0.270218	0.260267	0.263942
LUSC	0.300439	0.299245	0.29112	0.286701	0.311009	0.308196	0.311227	0.316451	0.300915	0.330352
CHOL	0.371515	0.392858	0.37213	0.379524	0.414974	0.356174	0.365118	0.430399	0.377737	0.424872
OV	0.276124	0.283365	0.239738	0.244567	0.335673	0.336166	0.352332	0.386154	0.281308	0.435241
PAAD	0.176311	0.178572	0.175904	0.17538	0.19297	0.185521	0.18569	0.191347	0.177748	0.206172
PRAD	0.292503	0.289891	0.282191	0.276163	0.289884	0.286589	0.289873	0.299247	0.286388	0.298236
PCPG	0.323324	0.30194	0.36547	0.334487	0.331453	0.369143	0.342284	0.337271	0.313307	0.2329
READ	0.331565	0.330316	0.31455	0.321327	0.357311	0.351112	0.3442	0.375897	0.330314	0.358047
STAD	0.256351	0.254019	0.25154	0.249354	0.261536	0.258419	0.259302	0.269044	0.256777	0.272225
SARC	0.323874	0.332091	0.301767	0.29651	0.367448	0.355563	0.353191	0.407583	0.323473	0.460861
SKCM	0.33267	0.332807	0.338082	0.338002	0.334133	0.333857	0.337588	0.328882	0.333842	0.341552
TGCT	0.227037	0.218266	0.187642	0.199093	0.220929	0.244629	0.255251	0.208792	0.214914	0.26215
THCA	0.287383	0.299492	0.318329	0.321277	0.323484	0.272104	0.319978	0.302198	0.293508	0.248104
THYM	0.251807	0.252345	0.266194	0.291116	0.272863	0.267197	0.246534	0.293396	0.251896	0.21876
UCEC	0.320593	0.320654	0.316695	0.316516	0.326107	0.326389	0.324613	0.330102	0.320701	0.3321
UCS	0.379751	0.399465	0.358663	0.369116	0.466178	0.444385	0.462729	0.478634	0.388505	0.493733
UVM	0.398139	0.385107	0.333836	0.353074	0.401878	0.34859	0.3817	0.369039	0.385333	0.275603
CESC	0.318681	0.319539	0.310674	0.310686	0.330937	0.329005	0.313526	0.324139	0.313599	0.34006
MESO	0.327295	0.32923	0.316141	0.31686	0.394655	0.331817	0.34845	0.345004	0.319839	0.355862
Supp Table 3. Mean VAF per halmark for each tumor type

## Sheet: Supp_table_4_rank_cancer_type
cancer_type	angiogenesis	death	growth	immortality	immune	inflammation	metabolism	metastasis	Genome Instability	proliferation
ACC	6	8	9	10	4	3	5	2	7	1
BRCA	8	7	9	10	3	5	4	1	6	2
BLCA	8	6	9	10	3	4	5	2	7	1
DLBC	6	8	10	9	5	3	4	2	7	1
COAD	8	7	10	9	2	3	5	1	6	4
ESCA	8	6	9	10	3	5	4	2	7	1
GBM	7	8	10	9	2	3	5	4	6	1
HNSC	7	8	9	10	3	5	4	2	6	1
KIRP	4	7	9	10	6	2	8	5	3	1
KIRC	9	5	10	7	2	6	4	1	8	3
KICH	8	5	9	10	3	6	4	2	7	1
LIHC	9	8	10	7	3	5	4	2	6	1
LGG	8	6	9	10	4	5	3	2	7	1
LUAD	6	7	9	10	2	4	1	3	8	5
LUSC	7	8	9	10	4	5	3	2	6	1
CHOL	8	4	7	5	3	10	9	1	6	2
OV	8	6	10	9	5	4	3	2	7	1
PAAD	8	6	9	10	2	5	4	3	7	1
PRAD	3	4	9	10	5	7	6	1	8	2
PCPG	7	9	2	5	6	1	3	4	8	10
READ	6	7	10	9	3	4	5	1	8	2
STAD	7	8	9	10	3	5	4	2	6	1
SARC	7	6	9	10	3	4	5	2	8	1
SKCM	9	8	2	3	5	6	4	10	7	1
TGCT	4	6	10	9	5	3	2	8	7	1
THCA	8	6	4	2	1	9	3	5	7	10
THYM	8	6	5	2	3	4	9	1	7	10
UCEC	8	7	9	10	4	3	5	2	6	1
UCS	8	6	10	9	3	5	4	2	7	1
UVM	2	4	9	7	1	8	5	6	3	10
CESC	6	5	10	9	2	3	8	4	7	1
MESO	7	6	10	9	1	5	3	4	8	2
Supp Table 4. VAF-based rank per halmark for each tumor type

## Sheet: Supp_table_5_VAF_per_patient
patient_id	angiogenesis	metabolism	death	proliferation	inflammation	metastasis	immortality	growth	immune	genome instability
TCGA-02-0003	0.381082	0.381082	0.395377	0.404866	0.333015	0.404866	0.39098	0.381082	0.333015	0.405708
TCGA-02-0033	0.22367	0.223342	0.242509	0.235177	0.210505	0.239133	0.24477	0.238416	0.141844	0.25
TCGA-02-0047	0.208429	0.340909	0.211353	0.172817	0.167599	0.176566	0.191796	0.207492	0.192361	0
TCGA-02-0055	0.340234	0.468898	0.41785	0.323651	0.461538	0.376673	0.6	0.556545	0.385531	0.556545
TCGA-02-2466	0.18949	0.217822	0.320011	0.267118	0.172993	0.232444	0	0.200902	0.171411	0.349125
TCGA-02-2470	0.241228	0.525581	0.308783	0.286257	0.187451	0.271594	0	0.380084	0.144654	0.525581
TCGA-02-2483	0.468927	0.636144	0.468927	0.898305	0.051024	0.898305	0.898305	0.898305	0.0625	0.898305
TCGA-02-2485	0.589036	0.566347	0.50914	0.552507	0.569551	0.558651	0.427338	0.52957	0.569551	0.55223
TCGA-02-2486	0.239669	0.419355	0.239931	0.343584	0	0.276551	0	0	0	0.146789
TCGA-04-1331	0.519433	0.331618	0.331946	0.361073	0.158055	0.324974	0.385542	0.621809	0	0.550335
TCGA-04-1332	0.285768	0.271087	0.211322	0.20931	0.241497	0.217392	0.192693	0.51938	0	0.51938
TCGA-04-1336	0.820755	0.820755	0.483172	0.454549	0.39172	0.454549	0.815139	0.495244	0.324921	0.820755
TCGA-04-1341	0.383178	0.293772	0.244561	0.281049	0	0.297038	0.233546	0.299895	0	0.19863
TCGA-04-1342	0.167562	0.136965	0.140941	0.13515	0.174222	0.12428	0.208942	0.130779	0.106604	0.0964095
TCGA-04-1343	0.125519	0.245614	0.140621	0.145348	0.102524	0.0984667	0	0.182463	0.0988724	0
TCGA-04-1346	0.416238	0.344957	0.275385	0.25524	0.169014	0.24052	0.663462	0.458506	0.169014	0.663462
TCGA-04-1347	0.301264	0.408581	0.419616	0.274114	0.290213	0.284481	0.410418	0.310642	0.205343	0.545092
TCGA-04-1348	0.375	0.314064	0.275991	0.259585	0	0.284921	0.375	0.350291	0	0.346591
TCGA-04-1349	0.267933	0.306946	0.233767	0.243764	0.383836	0.290611	0.471839	0.320123	0	0.695364
TCGA-04-1353	0	0	0	0.0740781	0	0	0	0	0	0
TCGA-04-1356	0.28049	0.397695	0.251488	0.264757	0.157741	0.256106	0.520833	0.309498	0.21493	0.408175
TCGA-04-1357	0.169504	0.0403226	0.287212	0.221638	0.278219	0.209642	0.184337	0.283321	0.332684	0.181909
TCGA-04-1360	0.268961	0.234919	0.248141	0.233353	0.289679	0.251544	0.339981	0.261174	0.200003	0.327522
TCGA-04-1361	0.417782	0.29882	0.339913	0.24423	0.110489	0.194085	0.398882	0.343538	0.0641853	0.464273
TCGA-04-1362	0.39923	0.397399	0.374119	0.404553	0.285106	0.41232	0.792135	0.38835	0.318446	0.792135
TCGA-04-1367	0.582554	0.346967	0.259604	0.252349	0.350998	0.304352	0.497755	0.436957	0.451943	0.5453
TCGA-04-1369	0.291118	0.374713	0.274294	0.245844	0.131757	0.301878	0.364243	0.383122	0.0849421	0.549871
TCGA-04-1516	0.32	0.259521	0.376418	0.192616	0.443396	0.278182	0	0	0	0
TCGA-04-1542	0.52874	0.443535	0.411796	0.363077	0.245374	0.403753	0.927536	0.588768	0	0.540691
TCGA-04-1638	0.441665	0.544257	0.592693	0.429734	0.931818	0.257589	0.0875	0.666667	0.399279	0.659091
TCGA-04-1644	0	0.457627	0.290218	0.177107	0.287089	0.248669	0	0.11	0.298609	0.166667
TCGA-04-1646	0.449468	0.449468	0.449468	0.691767	0.123692	0.505178	0	0.449468	0	0
TCGA-04-1648	0.234539	0.0708661	0.198666	0.153717	0.168954	0.152976	0.079415	0.256421	0.109724	0.115545
TCGA-04-1649	0.343397	0.338947	0.248479	0.268382	0.186785	0.214867	0.651899	0.332562	0.327273	0.651899
TCGA-04-1651	0.495033	0.533144	0.454995	0.285106	0.545034	0.320744	0.443146	0.453704	0.352892	0.368837
TCGA-04-1652	0.527667	0.403093	0.410581	0.32538	0.109197	0.200265	0.907895	0.483608	0.24481	0.478639
TCGA-04-1655	0.582666	0.417016	0.582666	0.29119	0	0.249433	0.501159	0.378915	0.141975	0.924731
TCGA-05-4244	0.278494	0.20931	0.244955	0.289383	0.227668	0.307428	0.39067	0.266568	0.236389	0.194147
TCGA-05-4249	0.33623	0.314364	0.344584	0.320788	0.305892	0.300443	0.351492	0.285298	0.354104	0.356436
TCGA-05-4250	0.308409	0.330518	0.328529	0.336015	0.452251	0.349731	0.35215	0.300338	0.451206	0.28777
TCGA-05-4382	0.143807	0.147223	0.157118	0.151769	0.135168	0.144821	0.142016	0.145167	0.128408	0.148196
TCGA-05-4384	0.230077	0.230188	0.213166	0.210976	0.228608	0.207968	0.257895	0.209108	0.253514	0
TCGA-05-4389	0.225433	0.211766	0.170319	0.223254	0.22247	0.205463	0.261613	0.193413	0.242855	0
TCGA-05-4390	0.278557	0.269235	0.282281	0.30447	0.316035	0.299759	0.347544	0.358102	0.354974	0.279475
TCGA-05-4395	0.553641	0.52825	0.442461	0.420041	0.39212	0.459118	0.402753	0.418393	0.359935	0.471335
TCGA-05-4396	0.430244	0.368103	0.482119	0.50061	0.463959	0.481839	0.369748	0.405752	0.393939	0.514286
TCGA-05-4397	0.410534	0.401855	0.427123	0.445064	0.436353	0.432595	0.440859	0.423853	0.404316	0.616677
TCGA-05-4398	0.201562	0.177362	0.207702	0.210112	0.178113	0.194315	0.177849	0.205101	0.175914	0.264502
TCGA-05-4402	0.157615	0.0922568	0.117495	0.138053	0.233045	0.148105	0	0	0.186719	0.123753
TCGA-05-4403	0.221837	0.212278	0.207664	0.207362	0.18559	0.207516	0.302521	0.188234	0.265536	0.244898
TCGA-05-4405	0.175022	0.156309	0.210902	0.218921	0.250045	0.212219	0.203524	0.171938	0.240437	0.227994
TCGA-05-4410	0.229094	0.211542	0.221444	0.208593	0.181797	0.218769	0.207021	0.20224	0.182845	0.190186
TCGA-05-4415	0.501776	0.424677	0.49905	0.454942	0.453001	0.473426	0.459952	0.439784	0.40148	0
TCGA-05-4417	0.301612	0.31577	0.264785	0.234302	0.246098	0.223559	0.255727	0.280737	0.241449	0.434211
TCGA-05-4418	0.271825	0.304424	0.246981	0.273102	0.278694	0.279554	0.241958	0.275678	0.291779	0.287582
TCGA-05-4420	0.354201	0.40419	0.372278	0.358811	0.274542	0.333713	0.332009	0.347262	0.304871	0.354505
TCGA-05-4422	0.278424	0.309199	0.316425	0.307086	0.386803	0.344159	0.27907	0.292097	0.298955	0
TCGA-05-4424	0.144519	0.297588	0.164429	0.181049	0.18008	0.174905	0.235438	0.175596	0.200063	0.222553
TCGA-05-4425	0.196567	0.341805	0.310106	0.264366	0.196567	0.223258	0.25431	0.234049	0.169851	0.25
TCGA-05-4426	0	0.389495	0.365654	0.416436	0.481481	0.467447	0.395349	0.395349	0.481481	0
TCGA-05-4427	0.337044	0.2846	0.28821	0.305553	0.270105	0.289052	0.354671	0.311166	0.279967	0.392693
TCGA-05-4430	0.134052	0.210897	0.129438	0.141784	0.159326	0.138948	0.19462	0.161708	0.140407	0.161131
TCGA-05-4432	0.134337	0.192407	0.188317	0.191698	0.170177	0.171129	0.174858	0.188855	0.149398	0.313354
TCGA-05-4433	0.385553	0.365731	0.347945	0.273007	0.463415	0.273007	0.2731	0.33111	0.463415	0.304384
TCGA-05-4434	0.0977011	0.240876	0.0697515	0.0741583	0.203345	0.129403	0	0.0747765	0.354839	0.240876
TCGA-05-5420	0	0	0.075	0.079361	0.148764	0.13487	0	0.0666667	0.105769	0.0666667
TCGA-05-5423	0.442064	0.430477	0.427856	0.404221	0.422306	0.384345	0.516138	0.4459	0.362434	0.470869
TCGA-05-5425	0.216806	0.197076	0.208919	0.210241	0.214519	0.193086	0.212873	0.210634	0.227217	0.21726
TCGA-05-5428	0.303791	0.417573	0.313236	0.352077	0.273073	0.371786	0.259259	0.349113	0.30179	0.42959
TCGA-05-5429	0.331362	0.270874	0.344717	0.331119	0.300091	0.283105	0.371429	0.278106	0.290323	0
TCGA-05-5715	0.338169	0.458294	0.367317	0.385949	0.309754	0.343266	0.652174	0.45474	0.296339	0.340909
TCGA-06-0119	0.0996201	0.106383	0.0967164	0.115162	0.117021	0.132576	0	0.181818	0.117021	0.114187
TCGA-06-0122	0.373069	0.329217	0.328384	0.373069	0.378378	0.37539	0	0.373069	0.368088	0.381395
TCGA-06-0124	0	0.490909	0.360397	0.344104	0.272763	0.34195	0	0.344104	0.179838	0.490909
TCGA-06-0125	0.52239	0.599437	0.512017	0.436666	0.318584	0.439252	0.323376	0.442565	0.388009	0
TCGA-06-0126	0.398294	0.386893	0.371064	0.369584	0.402467	0.369584	0.413242	0.382731	0.339558	0.400631
TCGA-06-0128	0.0513326	0.237218	0.145333	0.0513326	0.075104	0.0652952	0.0540541	0.159905	0.075104	0
TCGA-06-0129	0.459542	0.625111	0.477705	0.459542	0.209184	0.513637	0.513637	0.60152	0	0.665846
TCGA-06-0130	0.269544	0.337209	0.269544	0.254812	0.201878	0.254812	0.337209	0.337209	0.243096	0.337209
TCGA-06-0132	0	0	0.15625	0.135802	0	0	0	0	0	0
TCGA-06-0137	0.427711	0.375	0.36328	0.422621	0.39592	0.408092	0.375	0.427711	0.376481	0
TCGA-06-0139	0	0	0	0.111111	0.111111	0.111111	0	0.111111	0.111111	0
TCGA-06-0140	0.24	0.24	0.24	0.234815	0	0.232222	0	0.232222	0.213333	0
TCGA-06-0141	0	0	0.125	0.125	0.125	0.125	0	0.125	0.0562249	0
TCGA-06-0142	0.0428571	0.0428571	0.0428571	0.0428571	0	0.0428571	0	0.0428571	0	0
TCGA-06-0145	0.39397	0.402534	0.342312	0.361196	0.394196	0.334044	0.361111	0.39054	0.394196	0.346933
TCGA-06-0151	0.353846	0.353846	0.316804	0.316804	0.282479	0.281573	0	0.279762	0.353846	0
TCGA-06-0152	0	0.430894	0.203894	0.422598	0.245174	0.392093	0	0.234234	0.245174	0.234234
TCGA-06-0154	0.633324	0.829755	0.499699	0.633324	0.340083	0.433849	0	0.829755	0.390551	0
TCGA-06-0155	0.331994	0.401755	0.383683	0.390071	0.6	0.416312	0.299389	0.407099	0.4875	0.662651
TCGA-06-0157	0.929175	0.62327	0.55708	0.521029	0	0.592654	0	0.929175	0.377358	0.398148
TCGA-06-0158	0.356318	0.0693937	0.219316	0.139007	0.343293	0.145119	0	0.207925	0.452311	0
TCGA-06-0166	0.208589	0.326531	0.26756	0.18675	0.228456	0.158758	0	0.241837	0.208589	0.326531
TCGA-06-0168	0	0.264706	0.264706	0.264706	0	0.264706	0.264706	0.264706	0	0
TCGA-06-0169	0.233918	0	0.233918	0.252253	0	0.270588	0.270588	0	0	0
TCGA-06-0171	0.278085	0.327929	0.274314	0.269045	0.310518	0.267588	0.254361	0.231329	0.319228	0
TCGA-06-0173	0.21433	0.207373	0.256989	0.279649	0.158719	0.236374	0.124178	0.223735	0.124178	0
TCGA-06-0174	0.53535	0.703136	0.532965	0.505467	0.291313	0.371887	0	0.539068	0.244283	0
TCGA-06-0184	0.375	0.3955	0.315408	0.315408	0.570681	0.315408	0.33934	0.315408	0.570681	0.3955
TCGA-06-0185	0.171383	0.171383	0.171383	0.216296	0.25286	0.228868	0	0.244893	0.250713	0
TCGA-06-0187	0	0.514628	0.478641	0.478641	0.409938	0.360831	0.428571	0.619318	0.401786	0.619318
TCGA-06-0188	0.356023	0.353585	0.346225	0.351821	0.448276	0.411407	0.397874	0.346225	0.448276	0.391395
TCGA-06-0189	0.0888796	0.0805369	0.0888796	0.12592	0	0.12592	0.0805369	0.0888796	0	0.064574
TCGA-06-0190	0.171833	0.21332	0.24749	0.238041	0.209254	0.174621	0.171833	0.187768	0.286492	0.227963
TCGA-06-0192	0.234552	0.37959	0.290802	0.279791	0.301993	0.301282	0.271084	0.281968	0.297394	0.488095
TCGA-06-0195	0.378199	0.46251	0.468713	0.414024	0.378906	0.444328	0.381352	0.470746	0.439453	0.550807
TCGA-06-0209	0.291262	0.291262	0.203239	0.188953	0.245487	0.228465	0	0.206077	0.245487	0.119512
TCGA-06-0210	0.166364	0.183031	0.195088	0.200713	0.201552	0.194807	0.166364	0.200713	0.207434	0.161972
TCGA-06-0211	0.223787	0.270902	0.272262	0.271866	0.322947	0.230705	0	0.0819828	0.365591	0.429911
TCGA-06-0213	0.219156	0.353535	0.251991	0.239134	0.130952	0.239134	0.307359	0.330447	0.221793	0.353535
TCGA-06-0214	0.264466	0.179473	0.283067	0.274364	0.252635	0.271277	0	0.271277	0.252635	0.0714286
TCGA-06-0216	0	0.688067	0.61222	0.638158	0	0.534928	0	0.638158	0.048	0.815789
TCGA-06-0219	0	0.23913	0	0	0	0.0477707	0.4375	0	0	0
TCGA-06-0221	0	0.364341	0.0744772	0.0731557	0	0.0744772	0	0.0678733	0.364583	0
TCGA-06-0237	0.557247	0.550147	0.550147	0.557247	0	0.557247	0.42	0.633168	0.384106	0.42
TCGA-06-0238	0	0	0.280491	0.294146	0	0.232577	0	0.305882	0.203883	0
TCGA-06-0240	0.0823529	0	0.086631	0.086631	0.0823529	0.086631	0.0823529	0.0823529	0	0.0823529
TCGA-06-0241	0.500287	0.602941	0.492085	0.534521	0.445	0.501471	0.526471	0.602941	0	0.602941
TCGA-06-0644	0.280602	0.280602	0.24602	0.273767	0.169643	0.273767	0.365341	0.336082	0.358259	0.318182
TCGA-06-0645	0	0.2	0.280817	0.25544	0.3	0.25544	0	0.179487	0.3	0
TCGA-06-0646	0	0.512987	0.272283	0.271878	0.438356	0.307747	0	0	0.438356	0.273092
TCGA-06-0648	0.292044	0	0.292044	0.40389	0.349692	0.40389	0	0.40389	0.292044	0
TCGA-06-0649	0.073887	0.0867052	0.19954	0.210201	0.236111	0.17526	0.0867052	0.255336	0.309598	0.285714
TCGA-06-0650	0	0.119658	0.112461	0.159829	0	0.147551	0.2	0.159829	0	0.112461
TCGA-06-0686	0.711305	0.376812	0.560722	0.601062	0	0.454051	0.904645	0.568996	0	0.425532
TCGA-06-0743	0.276275	0.229276	0.276598	0.305183	0.344444	0.306431	0.365915	0.229276	0	0.218391
TCGA-06-0744	0.399123	0.5	0.404997	0.41423	0.268817	0.5	0.5	0.5	0.347523	0.429688
TCGA-06-0745	0	0.197531	0.344068	0.4	0.104167	0.252083	0.288136	0	0	0
TCGA-06-0747	0.244318	0.520548	0.403234	0.40658	0.513002	0.450367	0.244318	0	0.445831	0
TCGA-06-0749	0.177244	0.208893	0.219413	0.208893	0.234043	0.224565	0.272189	0.208893	0.234043	0
TCGA-06-0750	0.232063	0.218073	0.232063	0.232063	0.229908	0.205668	0.333333	0.232063	0.333333	0
TCGA-06-0875	0.352309	0.513856	0.449928	0.417739	0.397405	0.409455	0.412328	0.450325	0.379981	0.52002
TCGA-06-0876	0.272356	0.358107	0.353942	0.332329	0.3	0.314424	0.295608	0.329123	0.326955	0.535431
TCGA-06-0877	0.321637	0.363548	0.323681	0.337851	0.370443	0.388987	0.333333	0.363548	0.353626	0.326531
TCGA-06-0878	0	0	0.323683	0.323683	0.354497	0.323683	0	0	0.329081	0
TCGA-06-0879	0.38	0.383195	0.38	0.348416	0.0743034	0.227152	0	0	0.0743034	0
TCGA-06-0881	0.169884	0.129528	0.119107	0.119107	0	0.101133	0	0.129528	0.0394089	0.089172
TCGA-06-0882	0.25	0.309289	0.275009	0.296941	0.416667	0.296941	0.333333	0.28685	0.333333	0.323699
TCGA-06-0939	0	0.279762	0.297321	0.269506	0	0.255589	0.35	0	0	0
TCGA-06-1084	0.0804444	0.132029	0.11184	0.150123	0.0896988	0.170203	0.228036	0.148951	0.130272	0.134025
TCGA-06-1087	0.185175	0.109035	0.142412	0.180728	0.0682245	0.193946	0.284736	0.268965	0.0801699	0.600187
TCGA-06-1800	0.480281	0.325452	0.32425	0.272518	0.242588	0.264394	0.52258	0.34937	0.169624	0.652022
TCGA-06-1801	0.214404	0.24505	0.205485	0.224765	0.208663	0.219238	0.338675	0.259238	0.206722	0.229398
TCGA-06-1802	0.352939	0.347022	0.318922	0.354789	0.365629	0.360739	0.369322	0.344804	0.345655	0.249189
TCGA-06-1804	0.20472	0.153439	0.199587	0.26324	0.205659	0.253366	0.0945946	0.153439	0.223744	0
TCGA-06-1805	0.153671	0.264737	0.190587	0.201768	0.19583	0.226211	0.208679	0.183666	0.247342	0.309414
TCGA-06-1806	0.276601	0.4375	0.4375	0.222639	0.4375	0.222639	0	0	0.4375	0
TCGA-06-2557	0	0	0.0738636	0	0	0.272727	0.0738636	0.264706	0	0
TCGA-06-2558	0.406023	0.575554	0.47828	0.430928	0.319692	0.405901	0.648148	0.575554	0.174304	0.575554
TCGA-06-2559	0.381253	0.397433	0.415636	0.394285	0.476744	0.378647	0.392062	0.397433	0.353963	0.512267
TCGA-06-2561	0.32684	0.32684	0.32684	0.323746	0.383347	0.318438	0.428404	0.32684	0.383347	0.313131
TCGA-06-2562	0.45186	0.294569	0.403233	0.353912	0.241079	0.274223	0.283582	0.283582	0.315623	0.138365
TCGA-06-2563	0.644368	0.531947	0.549797	0.497513	0.206897	0.464072	0.340909	0.644368	0.32163	0.340909
TCGA-06-2564	0	0.509434	0.375502	0.377406	0.056	0.248548	0	0	0.056	0
TCGA-06-2565	0.474844	0.380336	0.399538	0.423372	0.52	0.423372	0.195652	0.415252	0.52	0.309031
TCGA-06-2566	0.156386	0.269084	0.163645	0.149765	0.109495	0.121129	0.139688	0.135246	0.101521	0.101665
TCGA-06-2567	0.211845	0.211845	0.291834	0.291834	0	0.309235	0.375	0.26008	0	0.375
TCGA-06-2569	0	0.64652	0.435897	0	0.251701	0	0	0.492308	0.343799	0
TCGA-06-2570	0.605023	0.504497	0.518817	0.518817	0.333333	0.605023	0.605023	0.419552	0.333333	0.670772
TCGA-06-5408	0.306665	0.373016	0.287348	0.284091	0.334997	0.25	0.25	0.25	0.34767	0
TCGA-06-5410	0	0	0	0.0848497	0.0915332	0.0741103	0.0759494	0.09375	0.0526316	0.0680272
TCGA-06-5411	0	0.293725	0.292003	0.293725	0	0.293333	0	0.293333	0.447368	0.269116
TCGA-06-5412	0.101455	0.0689655	0.110978	0.123419	0.101191	0.137119	0.163043	0.1501	0.101455	0
TCGA-06-5413	0.38396	0.387755	0.347298	0.380844	0.369843	0.378181	0.387755	0.38107	0.364823	0.273973
TCGA-06-5414	0	0.319767	0.226415	0.319767	0.259259	0	0	0	0.259259	0
TCGA-06-5415	0	0	0	0	0.549094	0	0	0	0	0
TCGA-06-5416	0.313587	0.317711	0.312539	0.307011	0.318202	0.311799	0.314267	0.320274	0.307109	0.321611
TCGA-06-5418	0	0.523404	0.523404	0.504126	0.356245	0.411965	0.60479	0.504126	0.34498	0.523404
TCGA-06-5856	0.660328	0.206341	0.4771	0.412293	0.386667	0.457792	0.775087	0.493552	0.405446	0
TCGA-06-5858	0.462276	0.699904	0.659159	0.514517	0.293002	0.52205	0.494426	0.563416	0.401042	0.726132
TCGA-06-5859	0	0	0.390228	0.386414	0.520946	0.509221	0	0.398876	0.291892	0
TCGA-06-6388	0.271531	0.321429	0.34591	0.357599	0.0630631	0.311338	0	0.417582	0	0
TCGA-06-6389	0.580263	0.496646	0.407237	0.349319	0	0.384017	0.95	0.525	0.155263	0.505744
TCGA-06-6390	0.234375	0	0.254688	0.234375	0.2	0	0	0	0.2	0
TCGA-06-6391	0.267225	0.362816	0.211621	0.218633	0.306527	0.253757	0.375015	0.29812	0.306527	0
TCGA-06-6693	0	0	0.649147	0.643333	0	0.511628	0	0	0	0
TCGA-06-6694	0.499679	0.707692	0.507004	0.454518	0.659091	0.426458	0.648034	0.421101	0.475379	0.398215
TCGA-06-6695	0.425544	0.703704	0.370642	0.490648	0.369251	0.410566	0.335526	0.339762	0.404805	0
TCGA-06-6697	0.142539	0.0906344	0.17582	0.203813	0.135019	0.171163	0.0906344	0.142878	0.148576	0
TCGA-06-6698	0.42852	0.330836	0.434836	0.442136	0.166362	0.443394	0.43068	0.527771	0.231203	0.443623
TCGA-06-6699	0	0	0.510204	0.534468	0.398084	0.537276	0	0.394232	0.439024	0
TCGA-06-6700	0.230159	0.228663	0.237886	0.228766	0	0.230159	0	0	0.411765	0
TCGA-06-6701	0.878049	0.66679	0.878049	0.728223	0	0.728223	0.878049	0.728223	0.121212	0.878049
TCGA-06-A5U0	0.692918	0.568427	0.568427	0.692918	0.623932	0.605736	0.692918	0.692918	0.623932	0.761905
TCGA-06-A5U1	0.368056	0.380952	0.263674	0.352253	0.529412	0.336235	0.159292	0.159292	0.529412	0
TCGA-06-A6S0	0	0.408602	0.482079	0.517464	0.360551	0.438196	0.408602	0.448982	0.360551	0
TCGA-06-A6S1	0.161754	0.0704433	0.174368	0.159992	0.0704225	0.164434	0	0.0704433	0.173673	0
TCGA-06-A7TK	0.32917	0.307498	0.358305	0.45147	0.327555	0.360633	0.246575	0.338797	0.330558	0
TCGA-06-A7TL	0.789474	0.521721	0.447186	0.447186	0	0.447186	0.789474	0.789474	0	0.789474
TCGA-08-0386	0.0666667	0	0.0926508	0.0676897	0.10687	0.0962472	0	0	0.10687	0
TCGA-09-0364	0.226504	0.117647	0.20933	0.171766	0.166291	0.155414	0.266667	0.16031	0.131579	0
TCGA-09-0365	0.462596	0.591103	0.399682	0.311059	0.138528	0.315263	0.989899	0.462596	0.106498	0.989899
TCGA-09-0366	0.333242	0.709091	0.204619	0.207063	0.175619	0.214689	0.424968	0.264317	0.438356	0.709091
TCGA-09-0367	0.393469	0.312734	0.240437	0.222109	0.423767	0.399075	0.882143	0.561575	0	0.439479
TCGA-09-0369	0.440557	0.661717	0.391716	0.271761	0.318264	0.323592	0.266749	0.256605	0.128233	0.912791
TCGA-09-1664	0.228571	0.166388	0.20082	0.273894	0.164972	0.271432	0.4	0.22381	0.289754	0.0728291
TCGA-09-1670	0.62855	0.552472	0.458249	0.676846	0.222951	0.60942	0.89313	0.833284	0.222951	0.505388
TCGA-09-1672	0.611111	0.611111	0.265994	0.265994	0.650794	0.358991	0.611111	0.611111	0.611111	0
TCGA-09-1673	0.570178	0.47565	0.694587	0.55871	0.4	0.565572	0.570178	0.565304	0.4	0.627958
TCGA-09-1674	0.170455	0.232007	0.306169	0.224264	0.180498	0.205334	0.262931	0.244958	0.411732	0.267516
TCGA-09-1675	0	0.477477	0.451974	0.567983	0	0.554259	0.477477	0.477477	0	0.46087
TCGA-09-2043	0.512314	0.748063	0.495084	0.440092	0.359704	0.47998	0.760494	0.553624	0.333905	0.476381
TCGA-09-2044	0.272894	0.524104	0.408695	0.213643	0.124127	0.180847	0.54413	0.237392	0.277787	0.358685
TCGA-09-2045	0.81918	0.553571	0.606017	0.690814	0.470563	0.644871	0.81918	0.690814	0.434084	0.764286
TCGA-09-2049	0.501975	0.470642	0.532993	0.437952	0.432502	0.374556	0.948905	0.557449	0.431236	0.625694
TCGA-09-2050	0.678765	0.473288	0.529942	0.45551	0.558671	0.478585	0.91018	0.53267	0.806554	0.76305
TCGA-09-2051	0.180289	0.116579	0.158823	0.149491	0.21799	0.16258	0.142022	0.197456	0.232311	0.195215
TCGA-09-2053	0.188267	0.193644	0.182927	0.204192	0.109347	0.212894	0.309081	0.29653	0.0717719	0.525974
TCGA-09-2055	0.351771	0.53002	0.379874	0.480395	0.350081	0.408379	0.312946	0.445299	0.0431655	0.660377
TCGA-09-2056	0.395089	0.455013	0.386661	0.419315	0	0.437971	0	0.410628	0	0
TCGA-10-0926	0.84136	0.42564	0.461249	0.481972	0	0.504131	0.84136	0.531791	0	0.560986
TCGA-10-0927	0.160452	0.0666667	0.0666667	0.141457	0.168	0.160452	0	0	0	0
TCGA-10-0928	0	0.132948	0.132948	0	0	0	0	0	0	0
TCGA-10-0930	0.26769	0.395363	0.349456	0.301979	0.314899	0.339974	0.19539	0.309098	0.313831	0.316693
TCGA-10-0931	0.854839	0.854839	0.717845	0.655845	0.464865	0.640018	0.640018	0.655845	0.437037	0.854839
TCGA-10-0933	0.251902	0.294118	0.251254	0.338632	0.445833	0.284035	0.369975	0.369975	0.445833	0
TCGA-10-0934	0.424828	0.424828	0.424828	0.424828	0	0.424828	0.424828	0.424828	0	0.424828
TCGA-10-0935	0.617133	0.617133	0.548239	0.524436	0.269763	0.477112	0.961538	0.479504	0.130435	0.452328
TCGA-10-0937	0.830325	0.830325	0.830325	0.830325	0	0.830325	0.830325	0.830325	0	0.830325
TCGA-12-0615	0	0.420118	0.352602	0.459302	0.431373	0.445337	0	0.370536	0.431373	0.330444
TCGA-12-0616	0.324948	0.408945	0.366292	0.371082	0	0.371082	0	0.238741	0	0
TCGA-12-0618	0.895833	0.895833	0.599152	0.534976	0.5	0.566535	0.678309	0.895833	0.409524	0.895833
TCGA-12-0619	0.490179	0.417808	0.458383	0.364744	0	0.310708	0.7	0.290077	0	0.7
TCGA-12-0656	0.45	0.493674	0.467633	0.367366	0.686291	0.399084	0.593146	0.403038	0.686291	0.581022
TCGA-12-0657	0.222003	0.286754	0.222287	0.205771	0.261334	0.205771	0.160222	0.201897	0.0735294	0
TCGA-12-0662	0.119353	0.151392	0.198649	0.237414	0.0373134	0.259157	0.142823	0.144699	0.0460829	0.193728
TCGA-12-0670	0.600014	0.550312	0.54823	0.435359	0.5	0.504796	0.5	0.431472	0.5	0
TCGA-12-0688	0.349005	0.312763	0.36933	0.379909	0.305469	0.414439	0.371622	0.502163	0.353882	0
TCGA-12-0691	0.479724	0.543176	0.378322	0.381841	0.351752	0.445033	0.777174	0.431562	0	0.777174
TCGA-12-0692	0.213177	0.481481	0.23336	0.346771	0.0436681	0.346771	0.508929	0.34127	0	0
TCGA-12-0707	0.212188	0.29347	0.284803	0.26682	0.195342	0.27328	0.254529	0.313879	0.120532	0.537307
TCGA-12-0773	0.505915	0.478275	0.359101	0.375658	0.391419	0.345611	0.832061	0.671251	0.32397	0.832061
TCGA-12-0775	0.128235	0.151477	0.139596	0.119632	0.144035	0.115904	0.138193	0.108338	0.134193	0.130669
TCGA-12-0778	0.114977	0.111577	0.116385	0.133331	0.123807	0.152185	0.155601	0.159848	0.112017	0.0770081
TCGA-12-0818	0.203798	0.343619	0.200286	0.169909	0.161393	0.171192	0.236229	0.218991	0.143945	0.254077
TCGA-12-0819	0.295201	0.295201	0.274113	0.272226	0.280991	0.283274	0.358696	0.295201	0.230397	0.394904
TCGA-12-0820	0.299953	0.125458	0.19767	0.260075	0.224773	0.207288	0.215818	0.3084	0.224072	0.072093
TCGA-12-0821	0.460401	0.860465	0.449616	0.577776	0.860465	0.577776	0.860465	0.651386	0.473585	0.457364
TCGA-12-0822	0.171854	0.148443	0.126148	0.16774	0.156343	0.17691	0.37931	0.226573	0.102466	0.0902239
TCGA-12-0826	0.0410959	0.0376086	0.0472155	0.108815	0.0577888	0.108244	0.0597484	0	0.0504222	0.32
TCGA-12-0827	0.148777	0.215979	0.181172	0.222709	0.104867	0.216667	0.285714	0	0.0634921	0.0380795
TCGA-12-0828	0.0668524	0.440002	0.243324	0.208492	0.172046	0.227899	0.358963	0.249818	0.111368	0.415048
TCGA-12-0829	0.145867	0.190576	0.154363	0.152199	0.16496	0.147837	0.154769	0.152454	0.171173	0.120934
TCGA-12-1088	0.300235	0.174165	0.160994	0.145468	0.234231	0.140044	0.28556	0.166003	0.176238	0.684211
TCGA-12-1089	0.172407	0.146212	0.111121	0.113014	0.106049	0.160747	0.0286845	0.123784	0.0767331	0.196424
TCGA-12-1092	0.347287	0.298643	0.347287	0.326065	0.491129	0.316774	0.347287	0.326065	0	0.223643
TCGA-12-1093	0.0903619	0.0810287	0.0946674	0.0776077	0.0906884	0.0741931	0.0559434	0.0659422	0.101606	0.0478976
TCGA-12-1597	0.452381	0	0.362524	0.453561	0.289855	0.403256	0	0.467532	0	0
TCGA-12-1598	0.46141	0.362016	0.456901	0.499055	0.321837	0.476734	0.647184	0.565849	0.246159	0.520588
TCGA-12-1599	0	0.271837	0	0.376268	0	0.376268	0.294118	0.235294	0	0
TCGA-12-1600	0.442615	0.418981	0.454964	0.375111	0.46183	0.364853	0.397601	0.407126	0.46183	0.418981
TCGA-12-1602	0.554852	0.549558	0.433381	0.482291	0.47544	0.409069	0.504508	0.461177	0.511628	0.24
TCGA-12-3644	0.219087	0.418696	0.221106	0.238107	0.0701433	0.213306	0.369096	0.34109	0.15946	0.334715
TCGA-12-3646	0.475	0.424658	0.304835	0.361188	0.478479	0.505466	0	0.26131	0.464148	0
TCGA-12-3648	0.464864	0.646939	0.315967	0.339782	0	0.249958	0	0.468189	0.0825688	0
TCGA-12-3649	0.36006	0.369029	0.2928	0.294603	0.350086	0.326556	0.355826	0.278003	0.349153	0.440367
TCGA-12-3650	0.412825	0.434976	0.368974	0.389041	0.446809	0.420103	0	0.357094	0	0.379247
TCGA-12-3651	0.163003	0.0888918	0.180915	0.160327	0.150892	0.151253	0.169248	0.194733	0.152296	0.132075
TCGA-12-3652	0.338717	0.104312	0.249524	0.338717	0.318966	0.338717	0.459459	0.281886	0.37493	0
TCGA-12-3653	0	0	0.0533333	0	0	0.289683	0	0.0955224	0.321429	0.0533333
TCGA-12-5295	0.12027	0.179159	0.263933	0.254019	0.272082	0.247843	0.0777027	0.196201	0.105405	0.353522
TCGA-12-5299	0.284585	0.284585	0.308959	0.316479	0	0.36316	0	0.441734	0.505573	0
TCGA-12-5301	0.366646	0.42	0.399154	0.35002	0.443299	0.37334	0.313433	0.362469	0.875	0.410959
TCGA-13-0714	0.512821	0.512821	0.512821	0.60016	0	0.512821	0.512821	0.60016	0	0.512821
TCGA-13-0717	0	0	0	0	0	0	0	0	0	0
TCGA-13-0720	0.566667	1	0.544444	0.59375	0.133333	0.59375	1	1	0.133333	0.571429
TCGA-13-0723	0.195122	0	0.186033	0.295838	0.214286	0.351717	0.564516	0.105477	0.388164	0
TCGA-13-0724	0.470087	0.876344	0.273098	0.300889	0.0314136	0.230979	0.470087	0.337809	0	0.876344
TCGA-13-0726	0.484233	0.252893	0.326752	0.390118	0.252151	0.445644	0.428752	0.369343	0.251911	0.385537
TCGA-13-0751	0.258264	0.188536	0.258264	0.163888	0	0.173358	0	0.0905974	0.37931	0
TCGA-13-0755	0.356164	0	0.355952	0.41808	0.21959	0.378882	0.340873	0.357683	0.239448	0.333333
TCGA-13-0757	0.517857	0.550231	0.306827	0.233021	0.144121	0.244857	0.461323	0.461323	0.144121	0.857143
TCGA-13-0758	0.622449	0.391012	0.391012	0.622449	0.102941	0.347884	0.622449	0.622449	0	0.285002
TCGA-13-0760	0.380595	0.464561	0.38438	0.290992	0.329083	0.323331	0.470387	0.520709	0.362109	0.452903
TCGA-13-0764	0.296919	0.316309	0.271415	0.261309	0	0.296919	0.346511	0.424136	0.113636	0.852399
TCGA-13-0765	0	0	0.341738	0.410081	0.821053	0.567299	0	0	0.250875	0.346734
TCGA-13-0766	0.323557	0.27208	0.267664	0.293839	0.406737	0.31786	0.27208	0.326509	0.33208	0.76
TCGA-13-0768	0.144366	0.153778	0.144366	0.144366	0.101695	0.127796	0.2309	0.2309	0.101695	0.2309
TCGA-13-0791	0.584142	0.640919	0.375303	0.321452	0.305808	0.285065	0.315225	0.366254	0.166679	0.913043
TCGA-13-0794	0	0	0.346154	0.267198	0.0568182	0.149945	0	0.047619	0	0
TCGA-13-0795	0.365604	0.260235	0.311135	0.287755	0.363497	0.266951	0.332086	0.465753	0.363497	0.258773
TCGA-13-0797	0	0.4	0.598204	0.598204	0	0	0	0.598204	0	0
TCGA-13-0800	0.260263	0.231344	0.184175	0.174802	0.14011	0.168465	0.203588	0.233448	0.150497	0.549283
TCGA-13-0803	0.111111	0.0987654	0	0.111111	0	0.111111	0	0	0.184127	0
TCGA-13-0804	0.820513	0.820513	0.540691	0.820513	0	0.820513	0.820513	0.820513	0.388393	0.820513
TCGA-13-0805	0.545249	0.40679	0.419415	0.279088	0	0.354825	0.722772	0.722772	0	0.722772
TCGA-13-0807	0.198827	0.172717	0.146689	0.158426	0.171278	0.160944	0.166541	0.139499	0.153581	0.193905
TCGA-13-0883	0.0745311	0.280155	0.200081	0.175148	0.105528	0.177625	0.320019	0.214219	0.111428	0
TCGA-13-0884	0.286438	0.37963	0.221948	0.244034	0.241581	0.258768	0.278431	0.260523	0.223851	0.425926
TCGA-13-0885	0.33815	0.293736	0.200203	0.190506	0.23762	0.189471	0.490099	0.188582	0.289724	0.29822
TCGA-13-0886	0.330666	0.311594	0.330666	0.233247	0.161952	0.191775	0.368421	0.330666	0.203132	0.353129
TCGA-13-0887	0.543815	0.376853	0.239684	0.267188	0.192766	0.340234	0.315427	0.227358	0.208333	0.344698
TCGA-13-0888	0.463004	0.336349	0.348542	0.293973	0.346167	0.338443	0.427989	0.360197	0.166345	0.824742
TCGA-13-0889	0.493215	0.455037	0.455037	0.455037	0.312924	0.493215	0.45762	0.557932	0.312924	0.698795
TCGA-13-0890	0.334606	0.334606	0.331875	0.32941	0.165443	0.356404	0.334606	0.356404	0.135295	0.533898
TCGA-13-0891	0.448252	0.439036	0.321537	0.186383	0.0502205	0.191488	0.261601	0.253242	0.0372616	0.463239
TCGA-13-0893	0.595991	0.454417	0.349874	0.426608	0.275964	0.372228	0.730542	0.496052	0.275964	0.439869
TCGA-13-0894	0.178034	0.278714	0.128669	0.200103	0.165884	0.15444	0.230442	0.183111	0.133511	0.156666
TCGA-13-0897	0	0	0	0	0.296434	0.446438	0	0	0.229965	0.0338542
TCGA-13-0899	0.805394	0.562291	0.461366	0.4899	0.714286	0.4899	0.562291	0.415105	0.714286	0.896501
TCGA-13-0903	0.272824	0.210415	0.175939	0.212032	0.170442	0.215741	0.21189	0.252932	0.225488	0.338963
TCGA-13-0904	0.421893	0.712852	0.339544	0.356601	0.467126	0.370398	0.455858	0.355896	0.583754	0.332135
TCGA-13-0905	0.520331	0.890909	0.446385	0.557821	0.236424	0.345774	0.677896	0.677896	0.332699	0.485332
TCGA-13-0906	0.327125	0.450873	0.429064	0.488747	0.419355	0.463725	0.864717	0.488747	0.419355	0.614176
TCGA-13-0908	0.161953	0.049421	0.116761	0.133119	0.105019	0.130152	0.0748052	0.154476	0.28012	0.104651
TCGA-13-0910	0.35086	0.217448	0.227748	0.228988	0.0947368	0.293878	0.54333	0.54333	0	0.637681
TCGA-13-0911	0.550562	0.550562	0.28065	0.331742	0.566802	0.198779	0.550562	0.290657	0	0
TCGA-13-0912	0.444444	0.419851	0.455471	0.442751	0.29181	0.309665	0.617082	0.442751	0.48855	0.787356
TCGA-13-0913	0.458538	0.609258	0.563988	0.430226	0.425714	0.418322	0.61134	0.611959	0.426573	0.897338
TCGA-13-0916	0.454333	0.424976	0.431573	0.387632	0.375419	0.418544	0.756055	0.547168	0.328358	0.756055
TCGA-13-0919	0.467391	0.268727	0.467391	0.281064	0	0.281064	0.281064	0.281064	0	0.467391
TCGA-13-0920	0.192548	0.240915	0.146159	0.156383	0.0900869	0.143043	0.233041	0.162382	0.0944771	0.332848
TCGA-13-0921	0.118682	0.104851	0.177806	0.116535	0.166231	0.115893	0.116866	0.144629	0.187098	0.179688
TCGA-13-0923	0.279865	0.290658	0.262432	0.279446	0.166116	0.232134	0.307874	0.254323	0.189099	0.488811
TCGA-13-0924	0.280899	0	0.341783	0.331371	0	0.396233	0.511905	0.280899	0.271369	0
TCGA-13-1403	0.492945	0.560027	0.503032	0.461267	0.527266	0.593799	0.841441	0.563521	0.616071	0.492945
TCGA-13-1404	0.402009	0.695652	0.51567	0.592957	0.833333	0.455295	0.421464	0.695652	0.452381	0.695652
TCGA-13-1405	0.449153	0.449153	0.437851	0.336071	0	0.437851	0.242086	0.466512	0.253669	0.449153
TCGA-13-1409	0.445932	0.541614	0.461749	0.395174	0	0.304308	0.555446	0.931193	0	0.665596
TCGA-13-1410	0.324324	0	0.291307	0.15072	0.260504	0.161191	0.199819	0.27041	0.255352	0.278016
TCGA-13-1411	0.296729	0.43856	0.212128	0.24643	0.187583	0.24536	0.24643	0.261119	0.154605	0.350457
TCGA-13-1412	0.709402	0.464076	0.424321	0.295085	0.5	0.295085	0.295085	0.424321	0.5	0.709402
TCGA-13-1481	0.161918	0.232696	0.138083	0.125828	0.123396	0.130906	0.324324	0.135931	0.111135	0.181559
TCGA-13-1482	0.372289	0.727774	0.480586	0.452233	0.535326	0.471404	0.555358	0.3566	0.579243	0.716418
TCGA-13-1483	0.441637	0.426919	0.468384	0.39436	0.105263	0.367433	0.618421	0.401304	0	0.618421
TCGA-13-1484	0.29762	0.429213	0.204788	0.180274	0.176471	0.184431	0.233866	0.237224	0.176471	0.239469
TCGA-13-1485	0.114678	0.192308	0.0758637	0.183703	0.1279	0.183703	0.192308	0.260788	0.1279	0
TCGA-13-1488	0.177967	0.287326	0.191348	0.203113	0.151209	0.226833	0.34315	0.36008	0.146402	0.301187
TCGA-13-1489	0.859244	0.489836	0.458728	0.447931	0.885246	0.435579	0.517387	0.379958	0.885246	0.481621
TCGA-13-1491	0.75	0.594828	0.298833	0.406955	0.384058	0.407557	0.571121	0.329894	0.553434	0.417
TCGA-13-1494	0.222688	0.166663	0.205076	0.189258	0.141593	0.180228	0.17856	0.155133	0.119989	0.208295
TCGA-13-1495	0.803419	0.729048	0.421824	0.286955	0	0.45241	0.803419	0.803419	0	0.375802
TCGA-13-1496	0.565691	0.419	0.305388	0.328648	0.212851	0.330076	0.420202	0.500701	0.236842	0.438234
TCGA-13-1497	0.183658	0.645995	0.301693	0.339627	0.357401	0.399046	0	0.216838	0.407136	0
TCGA-13-1498	0.530008	0.497627	0.472381	0.410498	0.458481	0.443524	0.461298	0.423325	0.49999	0.653061
TCGA-13-1499	0.351462	0.25655	0.267971	0.239342	0.139005	0.239342	0.438776	0.276734	0	0.438776
TCGA-13-1500	0.30908	0.389884	0.256167	0.231387	0.264256	0.330281	0.289857	0.418617	0.24795	0.534826
TCGA-13-1501	0.374299	0.404265	0.394349	0.224371	0.375	0.199868	0.252468	0.318346	0	0.337804
TCGA-13-1504	0.352444	0.602699	0.602699	0.304227	0.209291	0.275898	0.602699	0.602699	0	0.602699
TCGA-13-1506	0.266667	0.266667	0.266667	0.266667	0.171795	0.266667	0.266667	0.266667	0.266667	0
TCGA-13-1507	0.416667	0.129032	0.449132	0.392369	0.399088	0.366967	0.349448	0.592949	0.412026	0.30432
TCGA-13-1509	0.538471	0.460669	0.445834	0.414774	0.309366	0.367681	0.518868	0.518868	0.402812	0.615385
TCGA-13-1511	0.910714	0.458969	0.910714	0.910714	0	0.910714	0.910714	0.910714	0	0.910714
TCGA-13-1512	0.624198	0.853333	0.477089	0.430168	0.700186	0.489692	0.572236	0.712926	0.700186	0.853333
TCGA-13-2057	0.280277	0.295156	0.217576	0.20541	0.144474	0.217435	0.369129	0.28987	0.118678	0.882979
TCGA-13-2059	0.539144	0.481147	0.605971	0.320465	0.0431267	0.365104	0.600924	0.36306	0.174235	0.820896
TCGA-13-2060	0.686957	0.321465	0.433874	0.386883	0.193443	0.274215	0.536139	0.389978	0.2705	0.403002
TCGA-13-2061	0.295163	0.467754	0.316033	0.336384	0.31752	0.368452	0.540865	0.436207	0.214524	0.586995
TCGA-13-2065	0.768	0.231293	0.361775	0.448535	0.768	0.593908	0.303922	0.288803	0.4071	0
TCGA-13-2071	0.370757	0.351351	0.420134	0.421607	0.423641	0.429382	0.393805	0.438154	0.134371	0
TCGA-13-A5FT	0.599359	0.528955	0.507681	0.404623	0.36275	0.527778	0.502193	0.527778	0.381963	0.300638
TCGA-13-A5FU	0.609091	0.603535	0.414076	0.30213	0.257875	0.29871	0.609091	0.426894	0.4	0.818182
TCGA-14-0736	0	0.301587	0.276379	0.15303	0	0.24689	0.0833333	0	0	0
TCGA-14-0740	0.573288	0.733067	0.573288	0.578016	0.180526	0.578016	0.946903	0.659087	0.180526	0.946903
TCGA-14-0781	0.142857	0.14881	0.18254	0.18254	0	0.18254	0.142857	0.14881	0	0.154762
TCGA-14-0786	0.836393	0.547229	0.836393	0.449446	0.34507	0.422641	0	0.836393	0	0
TCGA-14-0787	0	0.36252	0	0.804348	0.482882	0	0	0	0.401145	0
TCGA-14-0789	0.231852	0.221896	0.234162	0.245055	0.271733	0.245055	0.284742	0.238881	0.263367	0
TCGA-14-0790	0.462862	0.643151	0.466678	0.506165	0.519205	0.531104	0.458653	0.617569	0.486879	0
TCGA-14-0812	0.217895	0.124795	0.165984	0.177907	0.156956	0.156122	0.181543	0.119275	0.193326	0.116138
TCGA-14-0813	0.393789	0.360298	0.3343	0.338065	0.418871	0.30216	0.438194	0.394801	0.491519	0.397635
TCGA-14-0817	0	0.434351	0	0.5	0.449928	0.437481	0	0.322581	0.348837	0
TCGA-14-0862	0.348346	0.206897	0.324689	0.348173	0.256286	0.279171	0.277361	0.277361	0.256286	0
TCGA-14-0865	0.317222	0.360459	0.154878	0.211414	0.0548523	0.214103	0.0548523	0.193919	0.10836	0.0603935
TCGA-14-0866	0.144456	0.161743	0.15543	0.158911	0.124388	0.179302	0.190623	0.198729	0.125801	0.14159
TCGA-14-0867	0.105939	0.408329	0.159434	0.186168	0.245663	0.21376	0.170918	0.276174	0.437141	0.391401
TCGA-14-0871	0.0487805	0	0.422535	0.35045	0.75	0.493908	0.217949	0.960452	0	0
TCGA-14-1034	0.284173	0.340122	0.3097	0.3504	0.236842	0.3504	0.371685	0.319466	0.236842	0.440721
TCGA-14-1037	0	0.468643	0.434808	0.398365	0.449279	0.351035	0.542056	0	0.288195	0.415789
TCGA-14-1043	0.0540541	0.694444	0.332833	0.340409	0	0.272727	0	0.272727	0	0
TCGA-14-1395	0.785012	0.785012	0.785012	0.785012	0	0.785012	0	0.785012	0	0.461538
TCGA-14-1396	0.134036	0.183493	0.130041	0.135173	0.124458	0.127049	0.147467	0.13639	0.136028	0.183022
TCGA-14-1450	0	0.28036	0.327586	0.283178	0.197825	0.301465	0	0.27193	0.1625	0.16875
TCGA-14-1451	0	0.172849	0.5	0.276462	0.395833	0.5	0	0.0529248	0	0.0557276
TCGA-14-1453	0.374432	0.274491	0.294605	0.364317	0.374432	0.378131	0.407996	0.407996	0.374432	0
TCGA-14-1455	0.285219	0.275609	0.275609	0.325794	0.462687	0.285219	0.31405	0.285219	0.462687	0
TCGA-14-1456	0.406156	0.317313	0.406156	0.400451	0.322523	0.406156	0.488667	0.406156	0.322523	0.741379
TCGA-14-1458	0.122431	0.118799	0.144074	0.134765	0.115433	0.126522	0.163465	0.105221	0.141114	0.0866981
TCGA-14-1794	0.166566	0.219788	0.199085	0.163972	0.114351	0.172005	0.155807	0.168943	0.121707	0.214597
TCGA-14-1795	0.190999	0.183581	0.187656	0.187549	0.20915	0.241181	0.195948	0.188873	0.191697	0.182341
TCGA-14-1821	0.874421	0.768829	0.874421	0.874421	0	0.874421	0.917949	0.811631	0.988764	0.917949
TCGA-14-1823	0.168651	0.333333	0.197842	0.170401	0.0826087	0.136713	0.227183	0.163765	0.197842	0.346939
TCGA-14-1825	0.426678	0.37969	0.426678	0.397273	0	0.426678	0.426678	0.426678	0	0.426678
TCGA-14-1827	0.512972	0.358563	0.161185	0.25666	0.0603264	0.226748	0.0442177	0.502976	0.0508037	0
TCGA-14-1829	0.417219	0	0.318681	0.417219	0.340741	0.417219	0	0	0.340741	0
TCGA-14-2554	0.305454	0.238795	0.320827	0.338113	0	0.315141	0	0.367727	0.131007	0.317586
TCGA-14-3476	0.162286	0.321637	0.311232	0.217566	0.192802	0.217566	0	0.0302326	0.0302326	0
TCGA-14-3477	0.68694	0.601226	0.43571	0.435756	0	0.487552	0.564122	0.598615	0.214968	0.973881
TCGA-14-4157	0.432432	0.344828	0.432432	0.432432	0	0.432432	0	0	0	0
TCGA-15-0742	0.580658	0.690672	0.494493	0.494182	0.491692	0.423921	0	0.630575	0.68851	0
TCGA-15-1446	0.114469	0.0857159	0.0977541	0.10305	0.108493	0.100746	0.129195	0.0918808	0.111447	0.110869
TCGA-16-0846	0.457771	0.594095	0.506438	0.506438	0.042517	0.594095	0.584416	0.594095	0.265468	0.594095
TCGA-16-0848	0.41385	0.367609	0.393358	0.333601	0.37111	0.333052	0.480357	0.399926	0.343923	0.379199
TCGA-16-0849	0.228447	0.424868	0.250864	0.16619	0.134201	0.20682	0.912281	0.377077	0	0.254948
TCGA-16-0850	0.380566	0.506203	0.356645	0.412786	0.230216	0.581522	0.609545	0.601449	0.227462	0.469318
TCGA-16-0861	0	0.341823	0.365338	0.39035	0.315426	0.413897	0.857143	0.638799	0.535527	0
TCGA-16-1045	0.512465	0.608619	0.404588	0.346692	0.175683	0.346002	0	0.472002	0.170885	0.449367
TCGA-16-1460	0.126058	0.196964	0.114238	0.101071	0.0948013	0.112988	0.180531	0.144461	0.100599	0.2641
TCGA-18-3406	0.250393	0.233441	0.22836	0.228791	0.303314	0.263249	0.375	0.28329	0.258658	0.375
TCGA-18-3407	0.27038	0.248641	0.180215	0.170259	0.23596	0.171957	0.210959	0.191978	0.23596	0.140625
TCGA-18-3408	0.502107	0.52884	0.323601	0.448169	0.270237	0.321508	0.478389	0.448169	0.371133	0.449741
TCGA-18-3409	0.353603	0.31855	0.324865	0.334141	0.324748	0.352515	0.369126	0.334816	0.31516	0.327737
TCGA-18-3410	0.385185	0.456888	0.303911	0.334595	0.279189	0.3381	0.327778	0.348342	0.228171	0.369565
TCGA-18-3411	0.0963043	0.333736	0.235921	0.297651	0.137124	0.277983	0.0940171	0.216791	0.168894	0.214741
TCGA-18-3412	0.415887	0.254136	0.202448	0.358159	0.318863	0.361708	0.257037	0.30003	0.477639	0
TCGA-18-3414	0.394187	0.382344	0.366208	0.323449	0.391733	0.355423	0.545212	0.440247	0.427481	0.372436
TCGA-18-3415	0.273377	0.238207	0.250627	0.200012	0.296296	0.235178	0.318182	0.336976	0.627907	0.318182
TCGA-18-3416	0.299899	0.472295	0.384627	0.339348	0.426496	0.350297	0.359231	0.342111	0.36556	0.399134
TCGA-18-3417	0.198169	0.237807	0.249434	0.237647	0.237296	0.241079	0.253319	0.274738	0.25236	0.274075
TCGA-18-3419	0.298357	0.351504	0.381278	0.326413	0.389869	0.361741	0.428054	0.366263	0.402822	0.342117
TCGA-18-3421	0.364811	0.34731	0.331398	0.336304	0.303775	0.328367	0.43531	0.388584	0.352417	0.406634
TCGA-18-4083	0.396916	0.462187	0.341749	0.356159	0.374468	0.340238	0.344965	0.424084	0.27549	0.588456
TCGA-18-4086	0.269231	0.30303	0.266402	0.305657	0.13505	0.283867	0	0.27021	0.208454	0
TCGA-18-4721	0.240086	0.204888	0.217767	0.205868	0.222895	0.185921	0.213105	0.233861	0.22807	0
TCGA-18-5592	0.472802	0.448792	0.416466	0.436097	0.361131	0.413375	0.576416	0.509991	0.396791	0.554134
TCGA-18-5595	0.290499	0.24264	0.270249	0.313034	0.298399	0.340873	0.249222	0.295188	0.234407	0
TCGA-19-0957	0.108204	0.171101	0.124464	0.143801	0.119148	0.137933	0.153371	0.157782	0.116859	0.488889
TCGA-19-1385	0.18328	0.16312	0.164575	0.162226	0.152885	0.174806	0.151746	0.188172	0.131345	0.0862665
TCGA-19-1386	0.142152	0.148376	0.13303	0.127076	0.131139	0.13317	0.119163	0.107166	0.113439	0.0823997
TCGA-19-1387	0.140208	0.310839	0.231345	0.185632	0.140243	0.15446	0.126437	0.201952	0.115477	0.455659
TCGA-19-1388	0.0915495	0.121897	0.108691	0.116808	0.131434	0.124278	0.119612	0.135363	0.146162	0.378791
TCGA-19-1389	0.136169	0.197198	0.161392	0.168061	0.17831	0.165717	0.149587	0.152878	0.177071	0.124553
TCGA-19-1390	0.372978	0.4154	0.406248	0.342905	0	0.464429	0.372978	0.372978	0.442396	0.372978
TCGA-19-1786	0.577778	0.202628	0.326322	0.465926	0.304698	0.443154	0.458761	0.327995	0.313043	0
TCGA-19-1787	0.607068	0.439343	0.578857	0.585505	0.510986	0.571428	0.591772	0.592799	0.495992	0.689171
TCGA-19-1788	0.203874	0.221328	0.202039	0.204465	0.187518	0.191401	0.163113	0.143382	0.104098	0.134501
TCGA-19-1789	0.502365	0.433145	0.498887	0.411826	0.239295	0.373486	0.406061	0.464094	0.275889	0
TCGA-19-1790	0.226368	0.269192	0.295455	0.267283	0.239819	0.249645	0.230769	0.272727	0.216376	0
TCGA-19-1791	0.168426	0	0.135392	0.148621	0.109248	0.145607	0.0985915	0.143111	0.0930251	0.0745342
TCGA-19-2619	0.262904	0.403488	0.281267	0.301944	0.31337	0.315722	0.42236	0.31337	0.365479	0.384615
TCGA-19-2620	0.249002	0.119238	0.204063	0.257508	0.297872	0.256444	0.329897	0.259922	0.297872	0
TCGA-19-2621	0.264484	0.265904	0.191266	0.199508	0.155893	0.191916	0.103557	0.266109	0.0903798	0.362731
TCGA-19-2623	0.370419	0.37777	0.402748	0.388211	0.271493	0.411364	0.560606	0.379948	0.235294	0.560606
TCGA-19-2624	0.149514	0.0415794	0.194386	0.149514	0.5	0.291463	0.365385	0.155169	0.5	0
TCGA-19-2625	0.268045	0.292607	0.290109	0.282109	0.268562	0.285623	0.281015	0.279981	0.264756	0.292659
TCGA-19-2629	0.121212	0.207071	0.217285	0.217285	0	0.194446	0.0997365	0.217285	0.452381	0.200534
TCGA-19-2631	0.222019	0.211903	0.31097	0.276456	0.20991	0.274865	0.217618	0.305023	0.3128	0
TCGA-19-4065	0.29716	0.32714	0.344082	0.320328	0.242291	0.31769	0.382015	0.29716	0.242291	0.521739
TCGA-19-4068	0.330435	0.438202	0.361698	0.438727	0.376147	0.492874	0.492874	0.316456	0.438202	0
TCGA-19-5947	0.257812	0.223418	0.223418	0.257812	0.257812	0.257812	0.257812	0.257812	0.177314	0
TCGA-19-5950	0.39823	0.512397	0.376642	0.308764	0.373718	0.308764	0.219298	0.365847	0.392535	0.512397
TCGA-19-5951	0.545455	0.480392	0.486462	0.442796	0.444883	0.44315	0.416667	0.489158	0.436194	0.464
TCGA-19-5952	0.40678	0.373967	0.384905	0.416121	0	0.5	0	0.5	0.32	0.5
TCGA-19-5953	0	0.234458	0.20807	0.232976	0	0.233523	0	0.300585	0	0.182822
TCGA-19-5954	0.365248	0.388531	0.33951	0.338152	0.305597	0.309947	0.380385	0.331264	0.335307	0
TCGA-19-5955	0.179775	0.179775	0.179775	0.20002	0.152715	0.175231	0.179775	0.20002	0.152715	0
TCGA-19-5956	0.268331	0.255346	0.268726	0.277772	0.261656	0.281891	0.286387	0.27025	0.248846	0.302708
TCGA-19-5958	0.0930233	0.236512	0.279698	0.287561	0.229547	0.294364	0.298244	0.273536	0.0930233	0
TCGA-19-5959	0.369231	0	0.398193	0.419103	0.437668	0.426582	0	0	0.48511	0.405229
TCGA-19-5960	0.531223	0.397027	0.452833	0.389225	0.601279	0.378609	0.416667	0.465583	0.488095	0
TCGA-19-A60I	0	0	0	0.370968	0.444444	0.370968	0	0	0.444444	0
TCGA-19-A6J4	0.438202	0.41791	0.298397	0.359726	0.172414	0.297289	0.438202	0.289463	0.139241	0
TCGA-19-A6J5	0.740451	0.69365	0.79919	0.696811	0	0.691317	0.776563	0.784375	0	0.934896
TCGA-20-0987	0.457223	0.508197	0.223511	0.229109	0.0967548	0.254391	0.275464	0.317456	0.078125	0.508197
TCGA-20-0990	0.452727	0.876	0.510434	0.372395	0.430288	0.414285	0.559622	0.456734	0.320513	0.524802
TCGA-20-0996	0.438224	0.438224	0.262972	0.262972	0.438224	0.343665	0.438224	0.438224	0.37189	0
TCGA-20-1682	0.376953	0.412354	0.38028	0.361469	0.36451	0.41509	0.484446	0.557122	0.217138	0.617391
TCGA-20-1683	0.524106	0.655415	0.474244	0.33826	0	0.394031	0.518539	0.571561	0	0.937272
TCGA-20-1684	0	0.314391	0.0536782	0	0.0267112	0	0	0	0.0919118	0.323529
TCGA-20-1685	0.450758	0.450758	0.394139	0.30287	0.220087	0.372577	0.450758	0.331755	0.344551	0.733333
TCGA-20-1686	0.397104	0.322787	0.26006	0.303594	0.312315	0.302741	0.731707	0.526259	0.312315	0.731707
TCGA-20-1687	0.553321	0.393946	0.365078	0.406395	0.23501	0.351252	0.596736	0.459394	0.23501	0.332975
TCGA-21-1070	0.250648	0.229282	0.246823	0.238393	0.21557	0.246096	0.178245	0.24768	0.229813	0.210874
TCGA-21-1071	0.172171	0.255382	0.179553	0.259794	0.232616	0.196255	0.245336	0.264647	0.215415	0
TCGA-21-1075	0.200575	0.444979	0.287547	0.235773	0.291961	0.238338	0.367761	0.141558	0.263886	0.152427
TCGA-21-1076	0.233931	0.186383	0.187831	0.163646	0.131001	0.15896	0.186261	0.146655	0.130214	0.154657
TCGA-21-1077	0.154675	0.131088	0.150622	0.147818	0.162471	0.169746	0.174317	0.142936	0.17239	0
TCGA-21-1078	0.462813	0.602638	0.511066	0.492316	0.395918	0.493772	0.396166	0.498981	0.475394	0.4
TCGA-21-1079	0.346696	0.343043	0.330949	0.353754	0.371208	0.357117	0.398366	0.327416	0.347975	0.369879
TCGA-21-1080	0.29766	0.392607	0.326182	0.350535	0.314619	0.339218	0.429886	0.376769	0.264594	0.425384
TCGA-21-1081	0.199717	0.253026	0.213098	0.201772	0.22093	0.277423	0.218706	0.27982	0.152752	0.237722
TCGA-21-1082	0.406891	0.369331	0.305904	0.321071	0.284143	0.328641	0.366547	0.312656	0.281875	0.408672
TCGA-21-1083	0.341226	0.379782	0.341905	0.344037	0.360402	0.350966	0.322112	0.326627	0.373297	0.362161
TCGA-21-5782	0.22466	0.248181	0.24524	0.250136	0.246995	0.248453	0.315434	0.279216	0.258292	0.24324
TCGA-21-5783	0.358624	0.267166	0.308085	0.311581	0.343478	0.329718	0.315992	0.320091	0.306803	0.2323
TCGA-21-5784	0.139859	0.142513	0.136521	0.132132	0.112831	0.136633	0.238924	0.146472	0.142894	0.16415
TCGA-21-5786	0.404098	0.335331	0.36101	0.398436	0.368894	0.401454	0.412576	0.342907	0.403499	0.516912
TCGA-21-5787	0.379593	0.271685	0.321174	0.321642	0.29601	0.327919	0.32032	0.300272	0.292333	0.415633
TCGA-21-A5DI	0.197515	0.154362	0.183361	0.190353	0.115011	0.205741	0	0.223598	0	0.137931
TCGA-22-0940	0.221549	0.15964	0.206159	0.199627	0.222347	0.217353	0.297493	0.264245	0.162265	0
TCGA-22-0944	0.257638	0.29709	0.28701	0.282076	0.22177	0.27993	0.373551	0.314558	0.217266	0.481481
TCGA-22-1000	0.0974265	0.117647	0.117647	0.096697	0.0697844	0.0913909	0.117647	0.106443	0.0468085	0.117647
TCGA-22-1002	0.16567	0.138362	0.192873	0.181016	0.202205	0.190452	0.18699	0.158661	0.181121	0
TCGA-22-1005	0.0548112	0.101217	0.0616325	0.0663556	0.0799464	0.0763813	0.0550429	0.0727059	0.0794218	0.0762073
TCGA-22-1011	0.180668	0.169811	0.183274	0.187232	0.192306	0.186778	0.217259	0.173226	0.177811	0.169811
TCGA-22-1012	0.205623	0.321358	0.188757	0.200607	0.156893	0.203984	0.202907	0.142186	0.174469	0.307692
TCGA-22-1016	0.226219	0.246375	0.21902	0.251342	0.228377	0.248318	0.307703	0.260123	0.257137	0.215333
TCGA-22-4591	0.230769	0.379555	0.313409	0.38448	0.249509	0.461434	0.188093	0.20354	0.41008	0.0311891
TCGA-22-4593	0.260522	0.254091	0.386072	0.519549	0.315078	0.455554	0	0.553803	0.368471	0
TCGA-22-4594	0.17429	0.164607	0.177733	0.172711	0.162661	0.165902	0.141848	0.195096	0.216995	0.287129
TCGA-22-4595	0.3	0.28923	0.329328	0.312307	0.334271	0.327297	0.287755	0.336106	0.358661	0.241463
TCGA-22-4596	0.1373	0.0477032	0.0822717	0.0890168	0.10097	0.0845973	0.0858896	0.0858896	0.141324	0
TCGA-22-4599	0.278025	0.311661	0.312953	0.315168	0.319053	0.32432	0.241925	0.296639	0.310205	0.305436
TCGA-22-4601	0.421139	0.44997	0.405863	0.353428	0.44401	0.340149	0.424993	0.397688	0.350357	0.369628
TCGA-22-4604	0.287472	0.246836	0.231004	0.25543	0.243281	0.28678	0.250461	0.280983	0.167243	0.423077
TCGA-22-4605	0.194872	0.179487	0.243506	0.229395	0.184961	0.239802	0.25641	0.26883	0.114204	0.25641
TCGA-22-4607	0.259079	0.259079	0.229193	0.227746	0.159915	0.224355	0.259079	0.259079	0.304165	0.402778
TCGA-22-4609	0.286524	0.388298	0.260632	0.215235	0.227622	0.226334	0.220339	0.221577	0.197238	0.128205
TCGA-22-4613	0.371116	0.258827	0.294806	0.318884	0.287409	0.321956	0.382178	0.326042	0.267662	0.275115
TCGA-22-5471	0.421263	0.373661	0.34657	0.316652	0.158633	0.278703	0.519024	0.370411	0.22233	0.402922
TCGA-22-5472	0.274078	0.347063	0.301306	0.300515	0.274063	0.294683	0.308497	0.353965	0.299521	0.39687
TCGA-22-5473	0.372725	0.326364	0.353127	0.297894	0.295608	0.312173	0.230675	0.280185	0.287813	0.41182
TCGA-22-5474	0.330782	0.398348	0.365066	0.286974	0.261995	0.319801	0.613636	0.448793	0.245453	0.640152
TCGA-22-5477	0.472354	0.407024	0.398179	0.407824	0.428416	0.388509	0.40367	0.417636	0.205882	0.8
TCGA-22-5478	0.267376	0.298542	0.257191	0.249666	0.380529	0.253166	0.421053	0.306381	0.380167	0.339098
TCGA-22-5479	0.245931	0.277035	0.247207	0.230485	0.212532	0.212277	0.241492	0.257527	0.237629	0.223711
TCGA-22-5480	0.431379	0.40077	0.389537	0.401344	0.3975	0.360159	0.482759	0.476725	0.290598	0.474713
TCGA-22-5481	0.384036	0.549467	0.375753	0.357795	0.392577	0.347367	0.527778	0.368869	0.316413	0.451681
TCGA-22-5482	0.562554	0.47432	0.449153	0.452935	0.356805	0.448105	0.639286	0.534377	0.432558	0.287264
TCGA-22-5483	0.539386	0.548114	0.407369	0.385975	0.419334	0.396914	0.526024	0.483058	0.41541	0.446299
TCGA-22-5485	0.308025	0.455669	0.437981	0.356437	0.387542	0.374757	0.464286	0.402751	0.40326	0.366667
TCGA-22-5489	0.23078	0.204047	0.280255	0.272201	0.171867	0.252933	0.27223	0.298996	0.22269	0.261515
TCGA-22-5491	0.425385	0.385994	0.340266	0.327062	0.279979	0.292382	0.370432	0.326912	0.325961	0.449398
TCGA-22-5492	0.238423	0.22536	0.260183	0.278059	0.24871	0.283918	0.306953	0.283586	0.270987	0.276676
TCGA-22-A5C4	0.403301	0.323482	0.339982	0.338685	0.272586	0.337479	0.291667	0.333898	0.313495	0
TCGA-23-1021	0.565033	0.497651	0.434257	0.379656	0.0672126	0.371402	0.340135	0.273873	0.45559	0.609266
TCGA-23-1022	0.437591	0.541577	0.296435	0.301308	0.281414	0.320811	0.469671	0.36639	0.270827	0.598198
TCGA-23-1027	0.346506	0.352387	0.478905	0.458292	0.363131	0.441728	0.664234	0.52415	0.380057	0.664234
TCGA-23-1029	0.555556	0.465488	0.267928	0.241603	0.226555	0.255266	0.555556	0.555556	0.188372	0.349206
TCGA-23-1030	0.567475	0.451823	0.41629	0.407548	0	0.407548	0.88777	0.572791	0.0847458	0.492174
TCGA-23-1031	0.31044	0.149172	0.25536	0.22939	0.24772	0.202856	0.0778443	0.151917	0.225742	0.130435
TCGA-23-1032	0.635723	0.487748	0.270989	0.20442	0.14036	0.201682	0.337357	0.372248	0.106114	0.458776
TCGA-23-1111	0.852459	0.852459	0.335797	0.417076	0.122905	0.478555	0.852459	0.573288	0.113778	0.852459
TCGA-23-1113	0.509255	0.510472	0.47695	0.403364	0.465649	0.328732	0.459413	0.376878	0.465649	0.836013
TCGA-23-1114	0.790356	0.431294	0.286824	0.361336	0.2012	0.251874	0.790356	0.790356	0.193054	0.416455
TCGA-23-1116	0.286658	0.103787	0.130234	0.179013	0.0802325	0.15785	0.0956115	0.107764	0.064858	0
TCGA-23-1117	0.347658	0.106791	0.218374	0.317212	0.231415	0.333586	0.308511	0.419175	0.117416	0.102564
TCGA-23-1118	0.41463	0.243554	0.280309	0.306514	0.374923	0.38441	0.392339	0.40316	0.276833	0.321993
TCGA-23-1121	0.196905	0.190828	0.200859	0.202089	0.179144	0.186228	0.248728	0.258598	0.16503	0.299735
TCGA-23-1122	0.260767	0.280805	0.180096	0.214351	0.196176	0.209694	0.344273	0.28433	0.210169	0.564644
TCGA-23-1123	0.431051	0.277141	0.287325	0.303876	0.306032	0.317656	0.308185	0.441002	0.224227	0.734177
TCGA-23-1124	0.418644	0.350473	0.346124	0.30498	0.319634	0.29002	0.32624	0.306183	0.277815	0.490995
TCGA-23-1809	0	0.77193	0.77193	0.395771	0.248677	0.510304	0.511525	0.395771	0	0.25974
TCGA-23-2072	0.794872	0.466667	0.403316	0.459414	0.183197	0.475949	0.71464	0.566962	0.324856	0.794872
TCGA-23-2077	0.178202	0.293078	0.162866	0.140296	0.0663124	0.155138	0.332553	0.18859	0.0769939	0.606426
TCGA-23-2078	0.114212	0.102046	0.158573	0.178166	0.178835	0.206616	0.158377	0.200479	0.175196	0.223782
TCGA-23-2079	0	0.364516	0.269215	0.355434	0.1875	0.318896	0.0606061	0	0	0
TCGA-23-2081	0.256055	0.334629	0.23161	0.191962	0.0559552	0.214215	0.475694	0.266773	0.206897	0.888889
TCGA-23-2084	0.34538	0.430378	0.219408	0.23394	0.180243	0.163495	0.206221	0.200351	0.229001	0.378497
TCGA-23-2641	0.872549	0.872549	0.611121	0.627156	0.495146	0.700097	0.872549	0.463793	0.477419	0.872549
TCGA-23-2643	0.314962	0.445231	0.31207	0.357054	0.0544218	0.314962	0.82197	0.82197	0.172125	0.523606
TCGA-23-2645	0.201653	0.256175	0.190935	0.22498	0.230582	0.223485	0.236005	0.192442	0.221548	0
TCGA-23-2647	0.34328	0.403561	0.215534	0.421755	0.381662	0.447647	0	0.276201	0	0.409667
TCGA-23-2649	0.37281	0.500104	0.406338	0.351419	0.210899	0.395313	0.668539	0.35659	0.235087	0.642116
TCGA-24-0966	0.810345	0.505172	0.331712	0.329006	0	0.396305	0.505172	0.442842	0	0.810345
TCGA-24-0970	0.455172	0.455172	0.222417	0.207893	0.040293	0.207893	0.375816	0.263975	0	0.455172
TCGA-24-0975	0.0683463	0.0993165	0.122584	0.0896828	0.115389	0.0969639	0.102733	0.113913	0.0685322	0.0656118
TCGA-24-0979	0.369718	0.405896	0.247888	0.329309	0.171938	0.299276	0.549744	0.409276	0.180998	0.518478
TCGA-24-0980	0.461538	0.392931	0.278861	0.232387	0.295946	0.186261	0.461538	0.375397	0.389773	0.324324
TCGA-24-0982	0.244606	0.264878	0.202842	0.169877	0.232015	0.259418	0.645733	0.295554	0.244582	0.645733
TCGA-24-1103	0.603701	0.900585	0.582869	0.612219	0.428899	0.616224	0.900585	0.743229	0.428899	0.91052
TCGA-24-1104	0.345362	0.333832	0.213667	0.265668	0.239821	0.254801	0.429628	0.224855	0.193232	0.344823
TCGA-24-1413	0.453416	0.694022	0.374673	0.369605	0.6	0.439038	0.947826	0.947826	0.388435	0.466471
TCGA-24-1416	0.616472	0.616472	0.616472	0.616472	0.402174	0.616472	0.616472	0.616472	0.402174	0.509378
TCGA-24-1417	0.532481	0.416819	0.380354	0.343609	0.666667	0.306724	0.54321	0.44407	0.523416	0.416819
TCGA-24-1418	0.486239	0	0.0625	0.274369	0	0.212325	0	0	0	0.170455
TCGA-24-1419	0.946472	0.946472	0.593274	0.566055	0.819048	0.649717	0.946472	0.596522	0	0.946472
TCGA-24-1422	0.287482	0.190225	0.15781	0.141501	0.0582206	0.168767	0.286016	0.232502	0.0996129	0.305742
TCGA-24-1423	0.241133	0.421828	0.208299	0.237593	0.200612	0.221069	0.133333	0.16959	0.256385	0.275362
TCGA-24-1424	0.456888	0.745665	0.302546	0.355641	0.164	0.228448	0.433746	0.390133	0	0.296453
TCGA-24-1425	0.410714	0.199671	0.203336	0.152413	0.163526	0.178981	0.410714	0.202074	0.348977	0.306935
TCGA-24-1426	0.293996	0.233204	0.203434	0.231844	0.170446	0.238482	0.369418	0.236178	0.197896	0.28101
TCGA-24-1427	0.23	0.360465	0.14625	0.14625	0.300872	0.213464	0	0.201957	0.360465	0.281915
TCGA-24-1428	0.718794	0.947791	0.696092	0.557197	0.466423	0.620307	0.947791	0.948472	0.587207	0.947791
TCGA-24-1430	0	0	0	0.0584416	0	0	0	0	0.205052	0
TCGA-24-1434	0.133333	0	0.133333	0.329825	0.0996736	0.0942669	0	0.0637066	0.157212	0
TCGA-24-1435	0.430249	0.328019	0.388192	0.443958	0.346658	0.385138	0.505397	0.362725	0.297197	0.364125
TCGA-24-1436	0.755396	0.755396	0.385113	0.426383	0.04536	0.345054	0.755396	0.501349	0.160655	0.332326
TCGA-24-1463	0.444048	0.487552	0.398658	0.422321	0.410153	0.427406	0.566071	0.544643	0.532563	0.732143
TCGA-24-1464	0.591667	0.591667	0.464129	0.591667	0.222542	0.292154	0.591667	0.591667	0	0.456605
TCGA-24-1466	0.817814	0.586538	0.40573	0.380312	0.169528	0.425613	0.483596	0.483596	0	0.564645
TCGA-24-1467	0.848039	0.483426	0.848039	0.67402	0	0.67402	0.848039	0.848039	0	0.848039
TCGA-24-1469	0.404243	0.355357	0.214318	0.198291	0.201496	0.214457	0.958824	0.293247	0.23527	0.609443
TCGA-24-1470	0	0.465323	0.39376	0.612476	0.0697674	0.413509	0	0.444444	0.0697674	0
TCGA-24-1471	0.917293	0.457845	0.328574	0.301264	0.246011	0.40926	0.685008	0.482313	0.346372	0.917293
TCGA-24-1474	0.518059	0.422131	0.419447	0.359497	0.222222	0.490072	0.905316	0.518059	0.283151	0.567796
TCGA-24-1550	0.27925	0.359984	0.38154	0.27952	0.268571	0.290609	0.387625	0.41087	0.268571	0.571429
TCGA-24-1551	0.414698	0.421816	0.365294	0.325493	0.217741	0.308664	0.431833	0.314121	0.0849673	0.776772
TCGA-24-1552	0.65858	0.495702	0.724709	0.418643	0.273092	0.418643	0.481787	0.377036	0	0.91716
TCGA-24-1562	0.728507	0.533267	0.585883	0.533267	0.338028	0.533267	0.533267	0.728507	0.400468	0.744688
TCGA-24-1564	0.672199	0.420197	0.420197	0.299282	0.229075	0.278579	0.672199	0.420197	0.229075	0.38256
TCGA-24-1565	0.413534	0.363313	0.363313	0.363313	0.415661	0.40223	0.405613	0.309623	0.390158	0
TCGA-24-1603	0.123488	0.333702	0.549036	0.19121	0.465882	0.381002	0	0.243353	0.307548	0.272814
TCGA-24-1616	0.897959	0.681089	0.569139	0.554243	0.409521	0.519902	0.554243	0.554243	0.316855	0.897959
TCGA-24-1842	0.685714	0.383941	0.34761	0.344755	0	0.435691	0.685714	0.435691	0	0.685714
TCGA-24-1843	0.424908	0.339436	0.333047	0.338486	0.371681	0.374099	0.483974	0.717949	0.234749	0.717949
TCGA-24-1844	0.373251	0.536659	0.218405	0.211079	0.197115	0.266759	0.435114	0.26044	0.212688	0.4027
TCGA-24-1845	0.300539	0.242796	0.267731	0.249247	0.222823	0.24517	0.418276	0.264925	0.189046	0.41867
TCGA-24-1846	0.37177	0.199568	0.454103	0.478327	0.292713	0.426867	0.630435	0.492544	0.416564	0.102564
TCGA-24-1847	0.486486	0.2861	0.386272	0.33231	0.169416	0.218373	0.486486	0.50873	0.216044	0.294845
TCGA-24-1849	0.311111	0.148115	0.152594	0.180509	0.182606	0.143535	0.311111	0.162397	0.143711	0.311111
TCGA-24-1850	0.3241	0.277602	0.250571	0.365154	0.0661134	0.296038	0.443328	0.342316	0.242569	0.453352
TCGA-24-1927	0.209447	0.166723	0.19289	0.236936	0.212006	0.274018	0.203403	0.271845	0.222152	0.632749
TCGA-24-2019	0.430311	0.24414	0.190382	0.20177	0.146511	0.2371	0.212248	0.2036	0.137531	0.475624
TCGA-24-2024	0.42379	0.298071	0.439497	0.443352	0.435274	0.489037	0.587374	0.522856	0.280284	0.621711
TCGA-24-2030	0.260129	0.363247	0.236346	0.207423	0.194696	0.229715	0.234387	0.252391	0.243071	0.684211
TCGA-24-2033	0.331455	0.282134	0.280018	0.285804	0.29415	0.320854	0.666667	0.360658	0.271117	0.666667
TCGA-24-2035	0.174366	0.191742	0.164439	0.168096	0.129414	0.172507	0.105199	0.21889	0.133388	0
TCGA-24-2036	0.426276	0.475144	0.386264	0.526762	0.665	0.426276	0.894737	0.894737	0.665	0.649681
TCGA-24-2038	0.543689	0.303663	0.543689	0.50775	0.543689	0.50775	0.543689	0.543689	0.543689	0
TCGA-24-2254	0.459383	0.369882	0.425836	0.38163	0.0571429	0.388724	0.396766	0.552437	0.257143	0.793427
TCGA-24-2260	0.880435	0.504738	0.488343	0.336028	0.213153	0.32587	0.880435	0.439075	0.222465	0.880435
TCGA-24-2261	0.338614	0.544583	0.544583	0.340121	0.214286	0.27551	0.616438	0.616438	0.0956522	0.336078
TCGA-24-2262	0.221507	0.301261	0.192423	0.245835	0.132068	0.23913	0.308554	0.762917	0.144892	0.54724
TCGA-24-2267	0.328016	0.230072	0.267186	0.245184	0.151848	0.244236	0.385027	0.329937	0.0866131	0.215388
TCGA-24-2271	0.15641	0.182437	0.189709	0.1515	0.11865	0.146877	0.252697	0.189448	0.138612	0.309581
TCGA-24-2280	0.17782	0.208533	0.171431	0.170995	0.119154	0.185922	0.220002	0.172832	0.162943	0.196959
TCGA-24-2281	0.283504	0.387523	0.160247	0.15904	0.312444	0.184738	0.636637	0.333432	0.456353	0.401652
TCGA-24-2288	0.25201	0.137035	0.147301	0.147567	0.0728036	0.181276	0.230168	0.176987	0.0563425	0.202901
TCGA-24-2289	0.374667	0.296985	0.286603	0.320993	0.271512	0.299415	0.371387	0.267441	0.295387	0.497326
TCGA-24-2290	0.585516	0.428263	0.487975	0.405019	0.736842	0.298806	0.428263	0.8125	0.35	0.451411
TCGA-24-2293	0.176993	0.110068	0.122983	0.123598	0.161964	0.121233	0.0574909	0.124021	0.130376	0.10069
TCGA-24-2295	0.54361	0.381151	0.225052	0.217666	0.193868	0.206275	0.426461	0.274814	0.203846	0.779528
TCGA-24-2298	0.191788	0.11921	0.199255	0.199274	0.191996	0.211637	0.188846	0.156631	0.210273	0.0552147
TCGA-25-1312	0	0.0472441	0	0	0	0	0	0	0	0
TCGA-25-1313	0.362019	0.194546	0.28824	0.219645	0.280531	0.250148	0.24992	0.295465	0.25543	0.285569
TCGA-25-1314	0.191459	0.353982	0.333052	0.278188	0.296565	0.271605	0.174721	0	0.27818	0
TCGA-25-1315	0.544393	0.455669	0.408479	0.438062	0.276076	0.593875	0.567753	0.639186	0.276076	0.579545
TCGA-25-1316	0.595745	0.595745	0.595745	0.595745	0.595745	0.595745	0.595745	0.595745	0.542058	0
TCGA-25-1319	0.65349	0.617374	0.563865	0.454713	0.218905	0.65349	0.65349	0.65349	0.218905	0.965517
TCGA-25-1320	0.244599	0.200581	0.187507	0.210428	0.158093	0.186001	0.0484258	0.108622	0.155823	0.329018
TCGA-25-1321	0.896552	0.896552	0.896552	0.903152	0.5	0.948276	0.896552	0.896552	0.5	0.896552
TCGA-25-1323	0.229794	0.331511	0.188185	0.197108	0.137203	0.187685	0.259244	0.369866	0.185778	0.457792
TCGA-25-1329	0.281141	0.32859	0.239122	0.235296	0.0820622	0.191515	0.22449	0.414948	0.099062	0.0564103
TCGA-25-2042	0.125282	0.131515	0.114571	0.106798	0.120882	0.102151	0.106371	0.109363	0.154669	0.0631121
TCGA-25-2391	0.346357	0.556894	0.335631	0.31871	0.147078	0.280761	0.160822	0.2078	0.147078	0.09375
TCGA-25-2392	0.238349	0.184374	0.195238	0.282878	0.135664	0.262722	0.267294	0.407244	0.115311	0.637931
TCGA-25-2393	0.353659	0.333333	0.375391	0.270794	0.372711	0.336186	0.333333	0	0.372711	0.0412371
TCGA-25-2396	0.825	0.825	0.633396	0.807237	0.789474	0.825	0.807237	0.825	0.47807	0.825
TCGA-25-2397	0.89899	0.497751	0.579162	0.549162	0.398496	0.600647	0.624495	0.649495	0.531806	0.89899
TCGA-25-2398	0.325547	0.169264	0.28846	0.188112	0	0.141509	0	0	0	0
TCGA-25-2399	0.25777	0.289565	0.3734	0.396639	0.526828	0.382904	0.679739	0.332663	0.345368	0.523249
TCGA-25-2400	0.34844	0.271402	0.230735	0.21923	0.196635	0.234708	0.400805	0.345226	0.162302	0.973913
TCGA-25-2401	0.44086	0.44086	0.323739	0.354991	0.24457	0.323121	0.402462	0.351382	0.257867	0.412349
TCGA-25-2404	0.503492	0.502328	0.461587	0.444987	0.4	0.458429	0.793651	0.46869	0	0.793651
TCGA-25-2408	0	0.52	0.52	0.52	0.318182	0.411515	0	0.52	0	0
TCGA-25-2409	0.586233	0.318995	0.542843	0.521231	0.552844	0.489911	0.652985	0.652985	0	0.652985
TCGA-26-1439	0.467998	0.507425	0.377387	0.442576	0	0.507425	0	0.507425	0	0
TCGA-26-1442	0.62069	0.493894	0.293735	0.254392	0	0.293735	0.374565	0.374565	0	0.62069
TCGA-26-1799	0.362263	0.10752	0.302027	0.263719	0.362263	0.280303	0.125	0.309812	0.368793	0.149286
TCGA-26-5132	0.270158	0.298295	0.220051	0.255503	0.343511	0.270158	0.343511	0.343511	0	0.421756
TCGA-26-5133	0.567204	0.432624	0.567204	0.463542	0.327155	0.593284	0.833333	0.833333	0.301075	0.635417
TCGA-26-5134	0.392523	0.37963	0.386226	0.407377	0.392523	0.425798	0.392523	0	0.403251	0.37963
TCGA-26-5135	0	0.352556	0.413508	0	0.338509	0.32984	0	0	0.391304	0
TCGA-26-5136	0.430907	0.430907	0.400778	0.400778	0.309907	0.409169	0.430907	0.430907	0.225731	0.789474
TCGA-26-5139	0.547394	0.824947	0.547394	0.824947	0	0.50149	0	0.824947	0.415584	0
TCGA-26-6173	0	0.280488	0.263622	0.276166	0.267687	0.269037	0.280488	0.280488	0.292683	0
TCGA-26-6174	0.251307	0.315898	0.303268	0.283429	0.240069	0.287959	0.229153	0.377645	0.332655	0.351097
TCGA-26-A7UX	0.388889	0	0.388889	0.431867	0.548387	0.450126	0	0.388889	0.463768	0.510309
TCGA-27-1830	0.415715	0.415715	0.274634	0.332699	0.261538	0.342266	0.569892	0.415715	0.239171	0.335165
TCGA-27-1831	0.31695	0.234689	0.277589	0.273214	0.266284	0.241232	0	0.194995	0.203518	0.115607
TCGA-27-1832	0	0.182337	0.0599251	0.388889	0.169497	0.333979	0.388889	0.0521739	0.0599251	0
TCGA-27-1833	0.403362	0.511524	0.403362	0.436509	0.0988593	0.354701	0	0.172043	0.383773	0
TCGA-27-1834	0.313725	0.480769	0.449624	0.396993	0	0.334576	0.344363	0.389832	0	0.272232
TCGA-27-1835	0.475214	0.593939	0.389507	0.433648	0.395309	0.439401	0.514141	0.450839	0.327427	0.75
TCGA-27-1836	0.250311	0.221053	0.323395	0.334981	0.27957	0.328311	0.221053	0.331127	0.29101	0.29742
TCGA-27-1837	0	0.6875	0.484926	0.44249	0	0.484926	0.337838	0.6875	0	0.530071
TCGA-27-1838	0.346772	0.453817	0.392636	0.348271	0.268295	0.377489	0.33688	0.503312	0.194661	0.453191
TCGA-27-2518	0	0.0909091	0.172993	0.102058	0.112179	0.106928	0.0909091	0.102058	0	0.0909091
TCGA-27-2519	0	0.501246	0.272912	0.486364	0	0.272912	0.318584	0.486364	0.315789	0.486364
TCGA-27-2521	0.0618557	0.547671	0.273492	0.295404	0.130757	0.205258	0.229167	0.170139	0.0721483	0.620668
TCGA-27-2523	0	0	0.342272	0.398998	0.406716	0.271845	0	0.51145	0.459083	0
TCGA-27-2524	0.346775	0.557252	0.380557	0.416934	0	0.416934	0.246742	0.481105	0	0.557252
TCGA-27-2526	0	0.728	0.728	0.728	0	0.728	0	0.728	0	0.728
TCGA-27-2527	0.12362	0.114796	0.12362	0.138799	0.110589	0.130544	0.107143	0.107143	0.106763	0.208556
TCGA-27-2528	0.807904	0.807904	0.461998	0.396471	0.228495	0.396471	0.209953	0.5644	0.228495	0
TCGA-28-1745	0.123604	0.140042	0.139101	0.147237	0.0957593	0.133317	0.0637062	0.130992	0.155251	0.217213
TCGA-28-1746	0.250705	0.455859	0.388788	0.405501	0.373262	0.357926	0.421053	0.45458	0.289887	0.551435
TCGA-28-1747	0.222888	0.127912	0.272864	0.263708	0	0.263708	0.349094	0.263708	0	0
TCGA-28-1749	0.147337	0.233136	0.11758	0.11758	0.450771	0.210079	0	0.147337	0	0
TCGA-28-1750	0.0627673	0.311845	0.156073	0.155237	0.088737	0.139472	0.382979	0.246462	0.0641757	0.247909
TCGA-28-1751	0.238966	0.32644	0.222482	0.18379	0.131695	0.216089	0.113937	0.143001	0.184873	0.0947063
TCGA-28-1752	0.146729	0.127083	0.125518	0.153183	0.0983179	0.153156	0.0992558	0.15433	0.0765206	0.0728655
TCGA-28-1753	0.237312	0.209268	0.238091	0.285336	0.287281	0.296756	0.213115	0.284963	0.324561	0.289763
TCGA-28-1755	0.086775	0.111111	0.187725	0.127505	0.0951017	0.125437	0.120915	0.106907	0.190122	0.170011
TCGA-28-1757	0.212366	0.223283	0.162387	0.154473	0.126119	0.141918	0.17094	0.198597	0.16774	0.205479
TCGA-28-1760	0.176498	0.194547	0.173751	0.166684	0.154257	0.167929	0.148357	0.153709	0.159254	0.189583
TCGA-28-2502	0.226629	0.305882	0.316393	0.273213	0.416667	0.296506	0	0.305882	0.225927	0.250502
TCGA-28-2506	0.213414	0.22757	0.154139	0.204876	0.167973	0.160016	0.243189	0.246352	0.143634	0.195048
TCGA-28-2509	0.455071	0.455071	0.455071	0.407365	0	0.407365	0.804878	0.363986	0	0.804878
TCGA-28-2513	0.0997908	0.125506	0.134835	0.126643	0.103564	0.124782	0.110137	0.107203	0.103564	0
TCGA-28-2514	0.371237	0.777778	0.574508	0.560764	0	0.777778	0.777778	0.777778	0	0
TCGA-28-5204	0.0520833	0.475823	0.475823	0.0520833	0.0520833	0.0520833	0.0520833	0.0520833	0.0520833	0
TCGA-28-5207	0.392688	0.402365	0.357455	0.358485	0.360497	0.364168	0.373006	0.389456	0.366492	0.568231
TCGA-28-5208	0.459016	0	0.469388	0.354437	0.413047	0.373962	0.459016	0.398052	0.869416	0
TCGA-28-5209	0.318188	0.374704	0.382477	0.382776	0.390841	0.375361	0	0.312796	0.309012	0
TCGA-28-5211	0.271026	0.310345	0.241038	0.239172	0.290308	0.225981	0.33486	0.33486	0.290308	0
TCGA-28-5213	0.182745	0.176678	0.192223	0.208551	0.215188	0.212573	0	0.223951	0.160105	0
TCGA-28-5214	0.213415	0	0.234224	0.234224	0	0.234224	0.234224	0.234224	0	0.388316
TCGA-28-5215	0	0	0.29661	0	0.29661	0.482945	0	0	0	0
TCGA-28-5216	0.595508	0.734921	0.621234	0.689947	0.507547	0.689947	0.771429	0.689947	0.507547	0.734921
TCGA-28-5218	0	0	0	0	0.288525	0	0	0	0	0
TCGA-28-5219	0.688679	0.688679	0.366283	0.342745	0	0.688679	0.688679	0.688679	0	0.39913
TCGA-28-5220	0.404959	0.404959	0.382167	0.382167	0.473098	0.382167	0	0.404959	0.473098	0
TCGA-28-6450	0.344828	0.309256	0.350381	0.379406	0.474116	0.437119	0.413155	0.383952	0.35394	0.290155
TCGA-29-1688	0.292569	0.238412	0.312049	0.254755	0	0.188669	0.742424	0.742424	0.0519481	0.742424
TCGA-29-1691	0.316583	0.185597	0.274854	0.236895	0.610074	0.366198	0.289286	0.253324	0.481325	0.215686
TCGA-29-1693	0.0605246	0.183435	0.185971	0.172721	0.304586	0.165058	0.0376344	0.249399	0.386109	0.305307
TCGA-29-1694	0	0	0.722222	0.396724	0.416667	0.40724	0	0.317308	0.583333	0.888889
TCGA-29-1695	0.390002	0.378173	0.41245	0.416832	0.121343	0.633663	0.633663	0.416832	0.117288	0.633663
TCGA-29-1696	0.394737	0.584465	0.345497	0.379072	0.533119	0.42781	0.394737	0.41671	0.412886	0
TCGA-29-1697	0.530238	0.362817	0.276476	0.306931	0.499406	0.306931	0.394511	0.307351	0.499406	0.989247
TCGA-29-1698	0.360339	0.703349	0.236656	0.318917	0.0835509	0.287132	0.703349	0.573897	0.0835509	0.385008
TCGA-29-1699	0.41909	0.3006	0.307511	0.305913	0.187847	0.30023	0.403875	0.400061	0.337079	0.637677
TCGA-29-1701	0.324046	0.295263	0.421069	0.193102	0.12048	0.217727	0.299985	0.260915	0	0.307029
TCGA-29-1702	0.488909	0.814228	0.446818	0.504603	0.270356	0.453889	0.648941	0.644268	0.241641	0.993534
TCGA-29-1703	0.463759	0.387986	0.336352	0.362934	0	0.393652	0.608379	0.608379	0.279635	0.878049
TCGA-29-1705	0.686567	0.619325	0.460843	0.393065	0	0.474389	0.619325	0.515448	0.306115	0.483284
TCGA-29-1707	0.648148	0.433192	0.40427	0.421541	0.317255	0.386668	0.609788	0.609788	0.282051	0.354686
TCGA-29-1710	0.248126	0.463576	0.319846	0.206142	0.114545	0.191426	0.293564	0.331788	0.140528	0.463576
TCGA-29-1711	0.60396	0.431258	0.458627	0.449525	0.255824	0.481416	0.519929	0.437706	0.255824	0.60396
TCGA-29-1761	0.0977421	0.269133	0.172104	0.131624	0.140467	0.159033	0.10226	0.117542	0.113538	0.0229492
TCGA-29-1762	0.610145	0.430018	0.394676	0.429977	0.391125	0.414691	0.537922	0.517603	0.456604	0.724736
TCGA-29-1763	0.167274	0.186217	0.159189	0.170556	0.180212	0.148571	0.217748	0.188728	0.169286	0.407143
TCGA-29-1764	0.301532	0.511111	0.365176	0.26823	0.196364	0.301532	0.293434	0.475902	0.272727	0.404444
TCGA-29-1766	0.261041	0.350704	0.231049	0.169851	0.361908	0.23063	0.666667	0.372807	0.295624	0.0822785
TCGA-29-1768	0.395349	0.303735	0.295457	0.198872	0	0.287623	0.395349	0.248307	0	0.395349
TCGA-29-1769	0.462636	0.555216	0.332459	0.415958	0.509202	0.413232	0.328767	0.255847	0.346065	0
TCGA-29-1770	0.27121	0.241057	0.189073	0.233702	0.219098	0.222432	0.241625	0.26717	0.23105	0.256827
TCGA-29-1771	0.108434	0.244321	0.108434	0.100728	0.217278	0.180997	0.108434	0.108434	0.380208	0.108434
TCGA-29-1774	0.757143	0.757143	0.296877	0.224056	0.287472	0.224056	0.437395	0.341597	0.464286	0.757143
TCGA-29-1775	0.9	0.46089	0.361144	0.386981	0.203704	0.419827	0.753797	0.778947	0.233408	0.547561
TCGA-29-1776	0.842105	0.463477	0.494495	0.582268	0.0534351	0.535282	0.843847	0.643024	0	0.842105
TCGA-29-1777	0.353679	0	0.268605	0.352225	0.205338	0.365596	0.580451	0.495649	0.237762	0.274615
TCGA-29-1778	0.361414	0.438337	0.25661	0.220859	0.10722	0.190748	0.66129	0.380645	0	0.66129
TCGA-29-1781	0.311388	0.239062	0.30691	0.339835	0.349582	0.313097	0.508197	0.323988	0.352941	0.421053
TCGA-29-1783	0.262075	0.166667	0.202988	0.326775	0.227931	0.210406	0.116869	0	0.139535	0
TCGA-29-1784	0.228856	0.222759	0.210079	0.215859	0.0656588	0.231321	0.360314	0.236254	0	0.343524
TCGA-29-1785	0.776224	0.422447	0.776472	0.642742	0	0.617933	0.776224	0.776224	0.386143	0.776224
TCGA-29-2427	0.381175	0.340735	0.330985	0.338565	0.281517	0.372326	0.476636	0.514741	0.281517	0.28888
TCGA-29-2429	0	0.247706	0.243409	0.247255	0.233039	0.24179	0	0.276027	0.136742	0.247706
TCGA-29-2431	0.366776	0	0.170188	0.392257	0.222825	0.256526	0	0	0.169559	0
TCGA-29-2432	0.468465	0.530387	0.453763	0.371734	0.324261	0.375792	0.524947	0.524947	0.291852	0.258408
TCGA-29-2434	0.634025	0.756227	0.40877	0.431884	0.428116	0.419712	0.497879	0.454643	0.393458	0.418924
TCGA-29-2436	0	0	0	0	0	0	0	0	0	0
TCGA-29-A5NZ	0.475758	0.406958	0.329556	0.307741	0.185243	0.381786	0.521148	0.475758	0	0.480952
TCGA-2A-A8VL	0.363636	0.295082	0.312035	0.286234	0	0.294118	0	0	0	0
TCGA-2A-A8VO	0.205192	0	0.255696	0.214697	0.135135	0.225378	0	0.238162	0.135135	0
TCGA-2A-A8VT	0.435294	0.517647	0.422675	0.457541	0.375189	0.399453	0.391477	0.517647	0.423203	0.262202
TCGA-2A-A8VV	0	0	0.0793651	0	0	0	0	0	0	0
TCGA-2A-A8VX	0.416667	0	0.416667	0	0.416667	0.361582	0	0	0.416667	0
TCGA-2A-A8W1	0	0	0	0	0	0	0	0	0	0
TCGA-2A-A8W3	0.148148	0	0.201078	0.201078	0	0.202015	0	0	0.253333	0
TCGA-2A-AAYF	0	0	0.309524	0.307201	0	0.304878	0	0	0	0
TCGA-2A-AAYO	0	0	0.369863	0	0.369863	0.0454545	0	0	0	0
TCGA-2A-AAYU	0	0	0.147541	0.5	0	0	0	0	0.509091	0.298246
TCGA-2E-A9G8	0.478723	0.553861	0.511413	0.488069	0.155556	0.522309	0	0.443762	0.326299	0
TCGA-2F-A9KO	0.152061	0.196571	0.169196	0.186523	0.26317	0.188297	0.150382	0.167561	0.228952	0.189849
TCGA-2F-A9KP	0.862249	0.731883	0.551624	0.579646	0.519826	0.636458	0.554891	0.661562	0.526867	0.492157
TCGA-2F-A9KQ	0.568794	0.414439	0.646683	0.53215	0.43299	0.565487	0.464968	0.460932	0.43299	0
TCGA-2F-A9KR	0.320357	0.438937	0.4373	0.435044	0.345907	0.440776	0.572904	0.572904	0.355305	0.606061
TCGA-2F-A9KT	0.318629	0.252737	0.297659	0.340157	0.301183	0.311961	0.339251	0.416793	0.326671	0.291975
TCGA-2F-A9KW	0.247917	0.326576	0.271285	0.294075	0.255254	0.234366	0.324378	0.318043	0.3125	0.276718
TCGA-2G-AAEW	0.221924	0.221924	0.221924	0.221924	0.221924	0.221924	0.221924	0.221924	0.221924	0
TCGA-2G-AAEX	0.108647	0.142559	0.144256	0.123325	0.108647	0.144303	0.108647	0.108647	0.106631	0
TCGA-2G-AAF1	0.123457	0.123457	0.123457	0.102545	0.0816327	0.102545	0	0.102545	0.0816327	0
TCGA-2G-AAF4	0.138462	0.138462	0.138462	0.138462	0.138462	0.138462	0.138462	0.138462	0.112088	0
TCGA-2G-AAF6	0.176955	0.176955	0.176955	0.176955	0.176955	0.176955	0.176955	0.176955	0.176955	0
TCGA-2G-AAF8	0	0	0	0	0	0	0	0	0	0
TCGA-2G-AAFE	0.234868	0.212637	0.220579	0.234868	0.126866	0.199682	0.0784314	0.273473	0	0.192
TCGA-2G-AAFG	0.142029	0.217391	0.142029	0.146634	0	0.142029	0	0	0.0666667	0
TCGA-2G-AAFH	0	0	0.117284	0	0	0	0	0	0	0
TCGA-2G-AAFI	0	0	0	0.453333	0.178571	0.299394	0.453333	0	0	0
TCGA-2G-AAFJ	0.0913043	0.168201	0.0913043	0.0913043	0.0913043	0.168201	0	0.0913043	0.0913043	0
TCGA-2G-AAFL	0	0	0	0	0	0	0	0	0	0.172662
TCGA-2G-AAFM	0	0	0.0482577	0	0.153986	0.057971	0	0	0.286677	0
TCGA-2G-AAFN	0	0	0	0	0	0	0	0	0	0.244186
TCGA-2G-AAFO	0	0	0	0	0	0	0	0	0	0
TCGA-2G-AAFV	0	0	0	0	0.144737	0.144737	0	0	0.128205	0
TCGA-2G-AAFY	0	0	0	0	0	0	0	0	0	0
TCGA-2G-AAFZ	0	0	0	0.05	0.05	0.05	0.05	0	0	0
TCGA-2G-AAG0	0	0.0985915	0	0.153419	0	0	0	0	0	0
TCGA-2G-AAG3	0	0	0	0	0	0	0.27551	0	0	0
TCGA-2G-AAG5	0	0	0	0	0	0	0	0	0	0
TCGA-2G-AAG6	0.328947	0	0.328947	0.328947	0.328947	0.328947	0	0.328947	0	0
TCGA-2G-AAG7	0.255319	0	0.255319	0.350746	0	0	0	0.350746	0	0
TCGA-2G-AAG8	0	0	0.194444	0	0	0	0	0	0	0
TCGA-2G-AAG9	0.18491	0.174661	0.188891	0.18491	0.189815	0.18491	0.198	0.18491	0.189815	0
TCGA-2G-AAGA	0	0	0.157895	0.194444	0.157895	0.17617	0.27907	0.194444	0	0
TCGA-2G-AAGC	0.273585	0	0.187251	0.187251	0	0	0	0.100917	0.273585	0
TCGA-2G-AAGE	0.266667	0	0.266667	0.259726	0.266667	0.267949	0	0.267949	0	0
TCGA-2G-AAGF	0.264706	0.371483	0.346016	0.264706	0.264706	0.264706	0.264706	0.371483	0.264706	0
TCGA-2G-AAGG	0	0	0	0	0.0769231	0.357143	0	0	0.305263	0
TCGA-2G-AAGI	0.333579	0.245283	0.254378	0.333579	0	0.237653	0.421875	0.421875	0	0.350467
TCGA-2G-AAGJ	0	0.0449438	0.0449438	0.0449438	0	0	0	0	0	0
TCGA-2G-AAGK	0.131579	0	0.131579	0.131579	0	0.131579	0.131579	0	0.131579	0
TCGA-2G-AAGM	0	0	0.517241	0.359811	0	0	0	0	0	0
TCGA-2G-AAGN	0	0	0	0	0	0	0	0	0	0
TCGA-2G-AAGO	0.276596	0.203515	0.276596	0.276596	0	0.276596	0	0	0.276596	0
TCGA-2G-AAGP	0	0.122261	0.114187	0.114187	0.157143	0.0980392	0	0	0	0
TCGA-2G-AAGS	0	0	0	0.345275	0	0	0	0	0	0
TCGA-2G-AAGT	0	0	0.155172	0	0.155172	0	0	0	0	0
TCGA-2G-AAGV	0	0	0	0	0	0	0	0	0	0
TCGA-2G-AAGW	0.0923077	0	0	0.143715	0	0.0923077	0	0.195122	0	0
TCGA-2G-AAGX	0	0	0	0.454545	0.454545	0.454545	0.454545	0	0	0
TCGA-2G-AAGY	0	0	0	0	0.176101	0.176101	0	0	0	0
TCGA-2G-AAGZ	0	0.103448	0.103448	0.104356	0.105263	0.104356	0.103448	0.104356	0.105263	0
TCGA-2G-AAH0	0	0	0	0	0	0	0	0	0	0
TCGA-2G-AAH2	0	0	0.162565	0.35	0	0.0408163	0.284314	0	0	0
TCGA-2G-AAH3	0.293333	0.293333	0.272955	0.293333	0.252577	0.210901	0	0.293333	0.252577	0
TCGA-2G-AAH4	0	0	0	0	0	0	0	0	0	0
TCGA-2G-AAH8	0.185942	0.16446	0.197431	0.16446	0.185942	0.185942	0.185942	0.185942	0.185942	0.113861
TCGA-2G-AAHA	0.204578	0.204578	0.204578	0.204578	0.116634	0.156794	0.172043	0.204578	0.116634	0
TCGA-2G-AAHC	0	0	0	0	0	0	0	0	0	0
TCGA-2G-AAHG	0	0.279461	0.246479	0.246479	0	0.246479	0	0.246479	0	0
TCGA-2G-AAHL	0.775194	0.452014	0.452014	0.497597	0	0.374676	0	0.775194	0	0
TCGA-2G-AAHN	0.22619	0.22619	0.179762	0.179762	0	0.22619	0	0.22619	0.0736842	0
TCGA-2G-AAHP	0	0	0	0.303571	0	0.303571	0	0.236246	0	0
TCGA-2G-AAHT	0.106464	0.106464	0.106464	0.106464	0	0.106464	0	0.106464	0	0
TCGA-2G-AAKD	0.353846	0	0.304474	0.304474	0	0.255102	0	0	0	0.606061
TCGA-2G-AAKG	0	0	0	0	0	0.257422	0	0	0	0
TCGA-2G-AAKH	0	0.262821	0.102947	0.19572	0.175	0.221795	0.115385	0.245192	0	0
TCGA-2G-AAKL	0	0	0	0	0	0	0	0	0	0
TCGA-2G-AAKM	0	0	0	0	0	0.241176	0	0	0	0
TCGA-2G-AAL5	0.449153	0	0.446809	0.449153	0.446809	0.449153	0	0	0	0
TCGA-2G-AAL7	0	0	0	0.156627	0	0	0	0.156627	0	0
TCGA-2G-AALP	0.230769	0	0.365385	0.324301	0	0.324301	0.371429	0.365023	0.218605	0
TCGA-2H-A9GF	0.310476	0.295805	0.317336	0.316046	0.293564	0.345523	0.333333	0.367586	0.381026	0
TCGA-2H-A9GH	0.626372	0.659875	0.475004	0.512919	0.413267	0.507341	0.74359	0.594115	0.49246	0.495601
TCGA-2H-A9GI	0.380326	0.219178	0.393992	0.364808	0.387628	0.35311	0.227273	0.329885	0.361844	0.622642
TCGA-2H-A9GJ	0.461987	0.379884	0.351838	0.383333	0.31143	0.367418	0.515188	0.397572	0.408652	0.75
TCGA-2H-A9GK	0.195375	0.242656	0.223755	0.229971	0.199759	0.238059	0.225444	0.257764	0.247759	0.282609
TCGA-2H-A9GL	0.0930233	0.26013	0.357023	0.358297	0.28984	0.319278	0.428139	0.408467	0.411765	0
TCGA-2H-A9GM	0.30303	0	0.487638	0.330282	0.545635	0.316402	0.30303	0.234651	0.146667	0.15
TCGA-2H-A9GN	0.483333	0.585946	0.480903	0.534998	0.373579	0.549673	0.567542	0.489054	0.425	0
TCGA-2H-A9GO	0.332632	0.290965	0.335751	0.365766	0.250129	0.362908	0.390965	0.337734	0.170455	0.59
TCGA-2H-A9GQ	0.608127	0.56826	0.549012	0.490397	0.450364	0.453843	0.510327	0.525424	0.61646	0.5
TCGA-2H-A9GR	0.245121	0.219513	0.226705	0.239599	0.275157	0.255327	0.227865	0.280363	0.239147	0.190242
TCGA-2J-AAB1	0.150167	0.150167	0.166575	0.169974	0.0809632	0.1747	0.159123	0.15463	0.0809632	0.0538721
TCGA-2J-AAB4	0.148812	0.148812	0.156281	0.148812	0.104993	0.13472	0.148812	0.148812	0.103448	0.194175
TCGA-2J-AAB6	0.506329	0.506329	0.359741	0.445198	0.416783	0.426223	0.506329	0.363315	0.455253	0.477876
TCGA-2J-AAB8	0.149504	0.115986	0.123043	0.125173	0.0732957	0.113926	0.115986	0.142393	0.0932203	0.205788
TCGA-2J-AAB9	0.0612845	0.0612845	0.0612845	0.054521	0.0445344	0.0763894	0.0612845	0.0584846	0.0445344	0.0780347
TCGA-2J-AABA	0	0.179878	0.179878	0.179878	0	0.179878	0.179878	0.167145	0	0
TCGA-2J-AABE	0.0974176	0.0974176	0.0974176	0.122916	0.0974176	0.0974176	0.0974176	0.0974176	0.0974176	0
TCGA-2J-AABF	0.121676	0.137274	0.113062	0.118052	0.103326	0.118052	0.104876	0.122842	0.103326	0.177273
TCGA-2J-AABH	0.210535	0.205315	0.201801	0.208663	0.23338	0.215851	0.210535	0.196254	0.210158	0
TCGA-2J-AABI	0.591356	0.591356	0.31901	0.452048	0.455293	0.452048	0.591356	0.452048	0.455293	0
TCGA-2J-AABK	0.108903	0.110698	0.108469	0.107946	0.104739	0.100718	0.102622	0.102622	0.0860328	0.119658
TCGA-2J-AABO	0.19914	0.199193	0.165	0.147716	0.200332	0.15875	0.235463	0.226995	0.152729	0.350649
TCGA-2J-AABP	0.341945	0.58457	0.171071	0.242578	0.273752	0.217085	0.242838	0.314597	0.280488	0.58457
TCGA-2J-AABR	0.0380546	0.0388733	0.0358409	0.0358409	0.0346154	0.0380546	0.0380546	0.0358409	0.0346154	0.0414938
TCGA-2J-AABT	0.118628	0.111137	0.111137	0.111137	0.114894	0.111137	0.105524	0.105524	0.114894	0
TCGA-2J-AABV	0.0511156	0.0482615	0.0482615	0.0511156	0.046824	0.0511156	0.0511156	0.0482615	0.0510949	0.0468448
TCGA-2K-A9WE	0.0892857	0	0.0953675	0.101078	0	0.100893	0	0.0892857	0	0
TCGA-2L-AAQA	0.332338	0.329809	0.327734	0.32149	0.330702	0.337089	0.331225	0.321785	0.285906	0.265582
TCGA-2L-AAQE	0.318283	0.318283	0.278268	0.278268	0.175086	0.233022	0.318283	0.278268	0.324687	0.348894
TCGA-2L-AAQI	0.153906	0.153906	0.141643	0.147342	0.131168	0.147163	0.153906	0.149952	0.123288	0.184524
TCGA-2L-AAQJ	0.209719	0.198999	0.210285	0.230709	0.227361	0.228156	0.209719	0.210595	0.206805	0.241379
TCGA-2L-AAQL	0.209661	0.209522	0.239942	0.198965	0.19515	0.195421	0.212248	0.250462	0.151159	0.310924
TCGA-2L-AAQM	0	0	0.0655738	0.0655738	0	0.0655738	0.480952	0	0	0
TCGA-2V-A95S	0.144144	0.141038	0.190407	0.222727	0.192071	0.17586	0.319444	0.144144	0.227658	0
TCGA-2W-A8YY	0.342759	0.338735	0.346318	0.347343	0.339996	0.339378	0.35353	0.34622	0.341354	0.369731
TCGA-2X-A9D5	0.404494	0.404494	0.404494	0.209326	0	0.404494	0	0.404494	0.233333	0
TCGA-2X-A9D6	0.244444	0.224786	0.244444	0.224786	0	0.244444	0	0.244444	0	0
TCGA-2Y-A9GS	0.420424	0.461538	0.33542	0.28201	0	0.34695	0.420424	0.420424	0	0.461538
TCGA-2Y-A9GT	0	0	0.306381	0.343305	0.232558	0.329832	0	0.271493	0.34179	0.125654
TCGA-2Y-A9GU	0.143117	0.282632	0.229124	0.183197	0.19935	0.176313	0.166667	0.178949	0.152286	0.176471
TCGA-2Y-A9GV	0.330283	0.042328	0.248141	0.319098	0.332036	0.319098	0	0.319098	0.327365	0.285714
TCGA-2Y-A9GW	0.144	0.0879985	0.16592	0.276244	0.216542	0.253086	0.144	0.121875	0.214286	0.0997506
TCGA-2Y-A9GX	0	0	0	0.227273	0	0.227273	0	0	0	0
TCGA-2Y-A9GY	0.329043	0.418876	0.362219	0.398827	0.301279	0.383627	0.468085	0.34223	0.426087	0.335394
TCGA-2Y-A9GZ	0	0	0.269841	0.306104	0.19837	0.303842	0.227642	0.227642	0.203169	0
TCGA-2Y-A9H0	0.650273	0.222222	0.31376	0.462502	0.460603	0.552346	0.550137	0.650273	0.634146	0
TCGA-2Y-A9H1	0.355705	0.287896	0.307659	0.289942	0.320807	0.263316	0.285807	0.297456	0.335138	0
TCGA-2Y-A9H2	0.337035	0.4	0.262612	0.241942	0.362887	0.249837	0	0	0	0
TCGA-2Y-A9H3	0.151419	0.203063	0.197194	0.176875	0.137262	0.169929	0.276472	0.206318	0.151052	0.227713
TCGA-2Y-A9H4	0	0.477545	0.427514	0.415136	0.42648	0.41657	0.417683	0.377551	0.422098	0
TCGA-2Y-A9H5	0.349057	0	0.348743	0.38121	0.272959	0.348408	0.321815	0.294574	0.375827	0
TCGA-2Y-A9H6	0.543478	0.195486	0.543478	0.349206	0.543478	0.349206	0	0	0.389176	0
TCGA-2Y-A9H7	0.37478	0.353333	0.361845	0.491737	0.436804	0.581968	0.648889	0.578426	0.353333	0.426667
TCGA-2Y-A9H8	0.676115	0.594059	0.529033	0.405542	0.564076	0.428513	0.594059	0.499946	0.564076	0.594059
TCGA-2Y-A9H9	0	0.323282	0.332482	0.314053	0	0.314053	0.354167	0.223096	0.639098	0.440252
TCGA-2Y-A9HA	0.31745	0.32381	0.371235	0.35421	0.496587	0.424327	0.385539	0.320426	0.366284	0
TCGA-2Y-A9HB	0.332903	0.441783	0.359649	0.337942	0.410956	0.410717	0.357606	0.356825	0.32905	0.387771
TCGA-2Z-A9J1	0	0.32529	0.340876	0.311968	0.334808	0.274012	0.276596	0.276596	0.330276	0
TCGA-2Z-A9J2	0	0.507463	0.374784	0.11462	0.137136	0.172126	0	0	0.23628	0
TCGA-2Z-A9J3	0	0.608279	0.445505	0.461346	0.358167	0.375587	0.415094	0.415094	0.35977	0.634857
TCGA-2Z-A9J5	0.524762	0.333333	0.419355	0.364815	0.514286	0.448015	0.294521	0.268677	0.397988	0.395349
TCGA-2Z-A9J6	0.0964091	0.243796	0.174147	0.238641	0.0443038	0.210879	0.134924	0.180565	0.0443038	0.461538
TCGA-2Z-A9J7	0	0	0.315896	0.358108	0	0.358108	0.358108	0.358108	0	0.474747
TCGA-2Z-A9J8	0.409091	0	0.407394	0.409091	0.128205	0.268648	0	0	0.128205	0
TCGA-2Z-A9JD	0.350149	0.329429	0.332352	0.397178	0.372093	0.373339	0	0.285281	0.372093	0
TCGA-2Z-A9JE	0.47191	0.507418	0.622609	0.671481	0.47191	0.938776	0	0	0.617756	0.352113
TCGA-2Z-A9JG	0.318073	0.404265	0.404265	0.375046	0.378238	0.36774	0.362788	0.386616	0.378238	0.505431
TCGA-2Z-A9JI	0	0	0.151515	0.151515	0	0	0.151515	0	0	0
TCGA-2Z-A9JJ	0.291262	0.291262	0.291262	0.291262	0.325581	0.308422	0	0	0	0
TCGA-2Z-A9JK	0	0.258065	0.20315	0.236559	0.232704	0.235274	0.258065	0.258065	0	0
TCGA-2Z-A9JL	0	0.469697	0.469697	0.61586	0	0.44063	0.469697	0.469697	0	0.435223
TCGA-2Z-A9JM	0.294492	0	0.350529	0.308922	0.299886	0.282849	0	0.326707	0.356992	0
TCGA-2Z-A9JN	0.207811	0.349206	0.246675	0.249142	0.246675	0.249142	0.349206	0.246675	0.246675	0
TCGA-2Z-A9JO	0.375	0.295455	0.284091	0.335227	0	0.375	0	0	0	0
TCGA-2Z-A9JP	0.33617	0.33617	0.407125	0.420984	0.33617	0.415935	0.33617	0.40618	0.33617	0.375
TCGA-2Z-A9JQ	0	0.275862	0.202447	0.317967	0.337005	0.386909	0.275862	0.269949	0.275862	0
TCGA-2Z-A9JR	0	0.289116	0.253153	0.15614	0	0.15614	0.238636	0.207452	0	0
TCGA-2Z-A9JS	0.20404	0.395636	0.385627	0.322983	0.381037	0.324983	0.210684	0.21746	0.398438	0.337866
TCGA-2Z-A9JT	0.226667	0.427746	0.343163	0.568182	0.226667	0.568182	0.306306	0.568182	0	0.244898
TCGA-30-1714	0.545513	0.851562	0.438068	0.470455	0.350296	0.391609	0.851562	0.683134	0.345746	0.851562
TCGA-30-1718	0.245763	0.192405	0.211696	0.170475	0.173011	0.17241	0.616883	0.616883	0.161595	0.232175
TCGA-30-1853	0.202193	0.435882	0.375021	0.193557	0.352941	0.255375	0.367329	0.36568	0	0.976471
TCGA-30-1855	0.607353	0.497738	0.514258	0.424972	0.232967	0.356555	0.764706	0.507826	0.381484	0.764706
TCGA-30-1856	0.299002	0.343178	0.27652	0.298613	0.202176	0.26376	0.302083	0.436514	0.056338	0.541667
TCGA-30-1857	0.35274	0.5	0.331809	0.331289	0.205479	0.282207	0.5	0.43302	0.2289	0.472222
TCGA-30-1862	0.28652	0.422666	0.245058	0.290641	0.140682	0.268978	0.290618	0.436692	0	0.714286
TCGA-30-1891	0.448362	0.461538	0.38018	0.423199	0.209666	0.368481	0.461538	0.537731	0.209666	0.368384
TCGA-31-1950	0.205349	0.169172	0.144955	0.140001	0.0602245	0.145216	0.277213	0.185627	0.119066	0.432203
TCGA-31-1953	0.100402	0.0729128	0.118764	0.137094	0.251838	0.339855	0	0	0.346974	0.3
TCGA-31-1959	0.162729	0.302938	0.3069	0.278852	0.190371	0.28179	0.267088	0.277195	0.190371	0.365909
TCGA-32-1970	0.630226	0.700658	0.536772	0.554424	0.25641	0.444003	0.561015	0.554424	0.180385	0.531925
TCGA-32-1976	0.207755	0.490408	0.334222	0.445209	0.207755	0.327744	0.401786	0.451139	0.278999	0.203765
TCGA-32-1977	0.114709	0.255359	0.183905	0.141897	0.213333	0.161757	0.2	0.172307	0	0.240876
TCGA-32-1979	0.210246	0.307709	0.228987	0.145813	0.35	0.151433	0.343067	0.210246	0.35	0.375
TCGA-32-1980	0	0.0526316	0.0526316	0.0882353	0	0.0882353	0	0.0882353	0.113043	0
TCGA-32-1982	0.443441	0.452276	0.336615	0.339044	0.232989	0.38617	0	0.452276	0.141509	0.168326
TCGA-32-1986	0	0.211679	0.241279	0.275882	0.241279	0.300919	0	0.285034	0.286143	0
TCGA-32-1991	0.186384	0.100943	0.119295	0.207646	0.156	0.231371	0.266596	0.165259	0.212718	0.175926
TCGA-32-2491	0.276596	0.250389	0.241698	0.246452	0.29347	0.271114	0.253852	0.222026	0.29347	0.192903
TCGA-32-2494	0	0.245199	0.211416	0.170732	0.315789	0.170732	0	0	0.315789	0.252101
TCGA-32-2495	0.323321	0.418417	0.349226	0.354595	0.269516	0.359686	0.342466	0.404207	0.373156	0.561154
TCGA-32-2615	0	0.5	0.5	0	0	0	0	0	0	0
TCGA-32-2616	0.357973	0.329527	0.31823	0.320536	0.307735	0.326687	0.328185	0.301846	0.285511	0.290045
TCGA-32-2632	0.217274	0.0992823	0.222638	0.271019	0.197479	0.198864	0.0992823	0.202953	0.141582	0
TCGA-32-2634	0.412976	0.413484	0.519272	0.508033	0.42135	0.519766	0.393333	0.491447	0.42135	0.684783
TCGA-32-2638	0	0.517128	0.314858	0.254922	0.291042	0.254922	0	0	0.271739	0
TCGA-32-4208	0.64914	0.43638	0.64914	0.878788	0	0.878788	0.878788	0.878788	0.419492	0.878788
TCGA-32-4209	0	0.153522	0.146216	0.0713648	0	0.09375	0.09375	0.09375	0.350877	0
TCGA-32-4210	0.427476	0.628864	0.628864	0.580884	0	0.481118	0.885601	0.852387	0	0.852387
TCGA-32-4211	0.277778	0.222222	0.212121	0.277778	0.212121	0.277778	0.217391	0	0.148837	0
TCGA-32-4213	0.365385	0.347586	0.27212	0.287485	0.239838	0.277932	0	0.278846	0.26738	0
TCGA-32-4719	0.146626	0.219998	0.25539	0.146626	0	0.146626	0	0.0295152	0	0
TCGA-32-5222	0	0.520155	0.582572	0.624161	0	0.624161	0	0.45172	0	0.483538
TCGA-33-4532	0.43669	0.488364	0.378671	0.312745	0.246029	0.290948	0.366002	0.247779	0.327862	0.400696
TCGA-33-4533	0.544869	0.36282	0.526548	0.515974	0.54183	0.565308	0.494552	0.577395	0.651786	0.610898
TCGA-33-4538	0.320707	0.234901	0.308646	0.27764	0.364754	0.250432	0.40678	0.343636	0.439579	0.423761
TCGA-33-4547	0.273632	0.227888	0.251417	0.238549	0.200671	0.237681	0.220313	0.245236	0.145339	0.393939
TCGA-33-4566	0.33861	0.341705	0.333826	0.338245	0.341214	0.358282	0.32453	0.347484	0.36044	0.309443
TCGA-33-4582	0.255182	0.413388	0.270806	0.30117	0.2166	0.277953	0.398683	0.316875	0	0.294561
TCGA-33-4583	0.268475	0.300189	0.326997	0.358539	0.37382	0.362093	0.238713	0.412984	0.359437	0.374938
TCGA-33-4586	0.378466	0.418546	0.384226	0.373247	0.363545	0.339803	0.345871	0.384131	0.349293	0.341291
TCGA-33-4587	0.617683	0.53258	0.56813	0.527572	0.458864	0.453549	0.511019	0.468141	0.506627	0.616924
TCGA-33-4589	0.121622	0.218269	0.181892	0.183416	0.18987	0.190807	0.247469	0.231383	0.18905	0
TCGA-33-6737	0.282814	0.278625	0.263683	0.280891	0.294391	0.293804	0.260851	0.234177	0.266847	0.371736
TCGA-33-6738	0.304259	0.260123	0.267889	0.285032	0.252036	0.288464	0.316667	0.358924	0.290953	0.314513
TCGA-33-A4WN	0.266497	0.263271	0.223109	0.226108	0.268767	0.232608	0.354992	0.285808	0.213306	0.276589
TCGA-33-A5GW	0	0.344643	0.430023	0.363014	0.454545	0.40058	0.0368932	0.371681	0.037037	0.653061
TCGA-33-AAS8	0.276433	0.417074	0.314114	0.326491	0.297179	0.326612	0.33782	0.267618	0.321946	0.310823
TCGA-33-AASB	0.225917	0.503523	0.306399	0.278271	0.213232	0.274987	0.252764	0.246192	0.231934	0.262293
TCGA-33-AASD	0.437571	0.433638	0.475381	0.451007	0.555667	0.509155	0.350877	0.375275	0.497181	0.298007
TCGA-33-AASI	0.315698	0.258066	0.269881	0.292173	0.269708	0.289208	0.255599	0.288881	0.250175	0.324369
TCGA-33-AASJ	0.344397	0.334902	0.352653	0.394096	0.411213	0.332325	0.486111	0.352382	0.352306	0.35866
TCGA-33-AASL	0.254532	0.229777	0.238308	0.197635	0.211211	0.204683	0.165927	0.21444	0.210226	0.186657
TCGA-34-2596	0.463455	0.426984	0.385541	0.357685	0.418897	0.395888	0.360259	0.36381	0.347614	0.329562
TCGA-34-2600	0.286592	0.306195	0.314045	0.329275	0.404812	0.328861	0.277456	0.30359	0.313634	0.428434
TCGA-34-2604	0.227373	0.153485	0.178651	0.19953	0.160823	0.199744	0.147955	0.162448	0.164974	0.167775
TCGA-34-2605	0.513112	0.413679	0.397594	0.418218	0.421265	0.415839	0.0393939	0.406883	0.46138	0.274818
TCGA-34-2608	0.0836741	0.12872	0.0917059	0.0863989	0.0958435	0.101521	0.10596	0.112116	0.0998846	0.130802
TCGA-34-2609	0.240857	0.234543	0.21642	0.203698	0.136655	0.211099	0.296043	0.226652	0.168734	0.253962
TCGA-34-5231	0.394627	0.393464	0.376441	0.405446	0.332228	0.379069	0.405566	0.41611	0.35499	0.393496
TCGA-34-5232	0.196976	0.219299	0.18508	0.180084	0.182493	0.183539	0.225071	0.204539	0.184158	0.167857
TCGA-34-5234	0.135593	0.095357	0.112224	0.117409	0.122772	0.130113	0.16	0.119808	0.115823	0.141502
TCGA-34-5236	0.231818	0.232839	0.195033	0.183004	0.126883	0.160134	0.225014	0.193003	0	0.313686
TCGA-34-5239	0.353865	0.302599	0.284209	0.323165	0.217219	0.30195	0.341085	0.267849	0.224702	0.326883
TCGA-34-5240	0.361831	0.476936	0.336591	0.363478	0.308117	0.345926	0.494652	0.345095	0.262279	0.468137
TCGA-34-5241	0.256914	0.322817	0.181965	0.205817	0.156875	0.229185	0.404255	0.199425	0.180073	0.191539
TCGA-34-5927	0.457392	0.361459	0.426828	0.46691	0.38689	0.455761	0.441575	0.498387	0.267688	0.451154
TCGA-34-5928	0.259105	0.20279	0.209573	0.192365	0.276422	0.241171	0.201363	0.213249	0.249729	0.214286
TCGA-34-5929	0.48119	0.474655	0.405415	0.457278	0.350099	0.440117	0.677956	0.468999	0.372232	0.715608
TCGA-34-7107	0.457088	0.526368	0.45677	0.400548	0.413098	0.461499	0.431818	0.487591	0.394705	0
TCGA-34-8454	0.211463	0.194241	0.202618	0.206515	0.194027	0.21682	0.198475	0.200606	0.193553	0.279289
TCGA-34-8455	0.286164	0.332714	0.320898	0.331931	0.335824	0.312331	0.32226	0.369033	0.30696	0.28017
TCGA-34-8456	0	0	0.15534	0.447368	0	0.447368	0	0	0	0
TCGA-34-A5IX	0.253257	0.255089	0.226816	0.251601	0.231873	0.225781	0.291649	0.277238	0.242763	0.33789
TCGA-35-3615	0.224039	0.356121	0.343264	0.30429	0.236842	0.26869	0.226279	0.27821	0.236842	0
TCGA-35-4122	0.0767918	0.119541	0.126274	0.123209	0.121321	0.118096	0.134993	0.109035	0.0939281	0.101947
TCGA-35-4123	0.240123	0.262995	0.208747	0.199621	0.188467	0.190815	0.270105	0.221236	0.183828	0.213338
TCGA-35-5375	0.432584	0.350454	0.343031	0.425053	0.319238	0.405256	0.566194	0.397495	0.363452	0.411033
TCGA-36-2530	0.693315	0.917101	0.618003	0.643994	0.609234	0.612713	0.719101	0.649565	0.520562	0
TCGA-36-2532	0.603257	0.639898	0.538033	0.498543	0.614259	0.498543	0.41505	0.603257	0.614259	0.784946
TCGA-36-2533	0.376403	0.71567	0.32816	0.309063	0.261616	0.331964	0.453985	0.453985	0.312226	0.453985
TCGA-36-2534	0.822368	0.341715	0.436592	0.398519	0.30059	0.415076	0.506422	0.494938	0.430243	0.250887
TCGA-36-2537	0.468292	0.37751	0.398756	0.459491	0.365282	0.459491	0.459491	0.5625	0.356481	0.5625
TCGA-36-2538	0.671141	0.664311	0.596513	0.479648	0.451245	0.491634	0.596513	0.472863	0.299495	0.671141
TCGA-36-2540	0	0	0	0	0	0	0	0	0.226667	0
TCGA-36-2542	0.367641	0.484311	0.397368	0.517545	0.0761589	0.43537	0.42434	0.527814	0	0.707143
TCGA-36-2543	0.333667	0.384098	0.423861	0.474825	0.303225	0.474825	0.409949	0.646425	0.516919	0.607843
TCGA-36-2544	0.413043	0.852459	0.413043	0.516037	0.248055	0.232838	0.413043	0.337835	0.443478	0.453659
TCGA-36-2545	0.5	0	0.335014	0.296159	0.323671	0.228212	0.179592	0.304038	0	0.135531
TCGA-36-2547	0.343348	0	0.152034	0.326717	0.339721	0.234226	0.0769231	0.160107	0.507368	0.221912
TCGA-36-2548	0.484164	0.640071	0.484164	0.424978	0.524212	0.491908	0.443663	0.395317	0.400793	0.833333
TCGA-36-2551	0.828804	0.828804	0.828804	0.482394	0.133333	0.481069	0.828804	0.482394	0	0.828804
TCGA-36-2552	0.621104	0.812413	0.621104	0.530011	0	0.485871	0.970149	0.621104	0	0.970149
TCGA-37-3783	0.193955	0.176169	0.180177	0.17206	0.202314	0.183512	0.197361	0.177471	0.209261	0.232143
TCGA-37-3789	0.37978	0.403804	0.349656	0.352505	0.275426	0.316673	0.343705	0.375181	0.406983	0.295827
TCGA-37-3792	0.255541	0.276015	0.284791	0.285256	0.261173	0.274894	0.311421	0.289912	0.240928	0.288506
TCGA-37-4129	0	0	0.0897833	0.0897833	0	0.0897833	0	0	0	0
TCGA-37-4130	0.368971	0.348361	0.409835	0.402041	0.361878	0.35626	0.350597	0.400627	0.333803	0.367646
TCGA-37-4132	0.296771	0.351254	0.311856	0.301796	0.239612	0.335823	0.344832	0.344658	0.280436	0.388889
TCGA-37-4133	0	0.357284	0.443415	0.305578	0.365088	0.334922	0.108527	0.327092	0.215821	0.365546
TCGA-37-4135	0.617489	0.533357	0.573932	0.497871	0.608596	0.504128	0.478899	0.47147	0.553353	0.863118
TCGA-37-4141	0.363585	0.368179	0.4026	0.408684	0.38176	0.417721	0.493428	0.365112	0.323873	0.411742
TCGA-37-5819	0.564305	0.408369	0.493906	0.525704	0.451963	0.52773	0.47546	0.473773	0.48153	0.470785
TCGA-37-A5EL	0.390495	0.580479	0.378649	0.383572	0.387691	0.440364	0.444794	0.451043	0.336319	0.499499
TCGA-37-A5EM	0.377082	0.367824	0.33604	0.348676	0.362887	0.340089	0.274042	0.326068	0.395031	0.471429
TCGA-37-A5EN	0.291275	0.276887	0.203738	0.223826	0.23972	0.301676	0.209789	0.240932	0.207902	0.431034
TCGA-38-4625	0.378008	0.299087	0.240685	0.272924	0.228134	0.256981	0.220902	0.330673	0.243118	0.191371
TCGA-38-4626	0.0783273	0.094614	0.068	0.088709	0.0678848	0.084198	0.0787019	0.0980318	0.0792362	0
TCGA-38-4627	0.143529	0.143529	0.143529	0.13317	0	0.13317	0	0.13317	0	0
TCGA-38-4628	0.2223	0.132353	0.245365	0.22177	0.10582	0.215584	0	0	0.113748	0
TCGA-38-4629	0.229726	0.276504	0.271772	0.264666	0.24	0.26913	0.267602	0.263021	0.210238	0
TCGA-38-4630	0.6	0.414754	0.467286	0.375104	0.555556	0.3594	0.389406	0.428089	0	0.405932
TCGA-38-4631	0.240715	0.255346	0.247542	0.258103	0.235283	0.248453	0.311965	0.268178	0.234003	0.225787
TCGA-38-4632	0.337084	0.242652	0.252598	0.249271	0.252064	0.250896	0.339284	0.302003	0.275882	0.280351
TCGA-38-6178	0.24307	0.177033	0.182705	0.246991	0	0.292973	0.423077	0.423077	0	0.271925
TCGA-38-7271	0	0.0915164	0.0790675	0.0746763	0.0904969	0.0858498	0	0	0.0780504	0
TCGA-38-A44F	0	0.0983607	0.0983607	0.0983607	0.0983607	0.0983607	0	0	0	0
TCGA-39-5011	0.29438	0.248992	0.255188	0.237958	0.217193	0.242924	0.396702	0.284645	0.256661	0.281992
TCGA-39-5016	0.281926	0.287615	0.301412	0.291798	0.270429	0.275057	0.2491	0.272807	0.320646	0.296866
TCGA-39-5019	0.324619	0.239777	0.277365	0.348734	0.21561	0.293602	0.342408	0.411769	0.286539	0.296296
TCGA-39-5021	0.264153	0.272227	0.254365	0.276818	0.186173	0.278782	0.300091	0.212103	0.185084	0.325808
TCGA-39-5022	0.0760159	0.110675	0.0997411	0.0972102	0.0804947	0.113334	0.193331	0.129621	0.112157	0.120467
TCGA-39-5024	0.178031	0.233421	0.170841	0.166633	0.111833	0.155959	0.167876	0.195487	0.0923979	0.208571
TCGA-39-5027	0.297455	0.274882	0.273868	0.300033	0.261269	0.330033	0.220561	0.276204	0.226923	0
TCGA-39-5028	0.122617	0.111149	0.112186	0.0977418	0.139361	0.131861	0.161074	0.0934815	0.164698	0.108348
TCGA-39-5029	0.284815	0.30972	0.242102	0.235659	0.274491	0.252169	0.351648	0.249577	0.227548	0.32
TCGA-39-5030	0.0645574	0.114963	0.113996	0.1045	0.101901	0.104815	0.0747177	0.102769	0.0979722	0.0705882
TCGA-39-5031	0.189837	0.180918	0.167096	0.204691	0.188483	0.196379	0.180181	0.234753	0.155804	0.259139
TCGA-39-5034	0.351658	0.425071	0.368151	0.328797	0.278748	0.322594	0.331307	0.31707	0.400602	0.319892
TCGA-39-5035	0.282975	0.340356	0.277264	0.272883	0.174394	0.270286	0.363065	0.310874	0.19388	0.322302
TCGA-39-5036	0.452209	0.172607	0.276344	0.337359	0.268417	0.324035	0.313651	0.329299	0.30312	0.467836
TCGA-39-5037	0.342351	0.287624	0.395077	0.351441	0.379602	0.338722	0.38609	0.447121	0.379602	0.429787
TCGA-39-5039	0.132091	0.197266	0.162935	0.157659	0.169949	0.159263	0	0.206452	0.18309	0.0879749
TCGA-39-5040	0.258842	0.183414	0.322317	0.362795	0.356115	0.359445	0.397071	0.37502	0.323187	0.317414
TCGA-3A-A9I5	0.190225	0.190225	0.190225	0.165615	0	0.190225	0	0.172402	0	0
TCGA-3A-A9I7	0.0655738	0.0625972	0.0623804	0.0539639	0.0655738	0.0655738	0.0655738	0.0625972	0.0655738	0
TCGA-3A-A9I9	0.135818	0.093776	0.122567	0.13074	0.116781	0.115108	0.111999	0.1237	0.113811	0.146086
TCGA-3A-A9IB	0.251569	0.251569	0.211961	0.183988	0.212598	0.183988	0.178553	0.178553	0.212598	0.237458
TCGA-3A-A9IC	0.147139	0.204474	0.204474	0.14396	0.151153	0.14075	0.204474	0.204474	0.159517	0
TCGA-3A-A9IH	0.220401	0.226241	0.220369	0.242144	0.193777	0.247644	0.215301	0.242144	0.170345	0.320513
TCGA-3A-A9IJ	0.316901	0	0.345329	0.246093	0	0.047619	0.316901	0.210688	0	0
TCGA-3A-A9IL	0	0	0	0	0	0	0	0	0	0
TCGA-3A-A9IN	0.391473	0	0.447581	0.391473	0.480712	0.42122	0.447581	0.447581	0	0
TCGA-3A-A9IO	0	0.4	0.4	0.235503	0.0774877	0.0774877	0	0	0.0774877	0.4
TCGA-3A-A9IR	0	0	0.456294	0.456294	0.456294	0.456294	0	0	0.465887	0
TCGA-3A-A9IS	0.456522	0	0.456522	0.388024	0	0.388024	0	0.319527	0.290938	0
TCGA-3A-A9IU	0.370589	0.370589	0.370589	0.370589	0.25552	0.346318	0.370589	0.370589	0.25552	0.437115
TCGA-3A-A9IV	0	0.313145	0.289557	0.27027	0.506615	0.27027	0	0.411255	0.601974	0.384873
TCGA-3A-A9IX	0.0350195	0.03497	0.0456659	0.0406858	0.0350195	0.0406858	0.03497	0.03497	0.0350195	0
TCGA-3A-A9IZ	0.322022	0.300991	0.300991	0.287079	0.258338	0.308303	0.322022	0.284376	0.258043	0.306152
TCGA-3A-A9J0	0.292395	0.416866	0.329712	0.26085	0.190938	0.235638	0.294111	0.266356	0.238786	0.421622
TCGA-3B-A9HI	0.110092	0.0948276	0.110092	0.110092	0.110092	0.110092	0.110092	0.110092	0.110092	0.285714
TCGA-3B-A9HJ	0.1	0	0.1	0.1	0	0.1	0	0.1	0	0
TCGA-3B-A9HL	0.34026	0.160278	0.269206	0.256252	0.259386	0.314114	0.407792	0.342857	0.342857	0
TCGA-3B-A9HO	0	0	0.139535	0.282982	0.275391	0.139535	0	0.139535	0.139535	0
TCGA-3B-A9HP	0.430634	0.65	0.4942	0.423467	0	0.361762	0.430634	0.562288	0	0.65
TCGA-3B-A9HQ	0.4375	0.423729	0.420343	0.312621	0.215686	0.346405	0	0.357026	0.296334	0
TCGA-3B-A9HR	0	0	0.306977	0.281347	0.392157	0.281347	0	0.263787	0.353055	0
TCGA-3B-A9HS	0.478261	0.107794	0.290912	0.291365	0.327366	0.291365	0	0	0.286557	0
TCGA-3B-A9HT	0.31187	0.27608	0.306213	0.301567	0.248056	0.269232	0.292183	0.303111	0.222824	0.185185
TCGA-3B-A9HU	0.677419	0.677419	0.677419	0.502832	0	0.502832	0.677419	0.677419	0	0.677419
TCGA-3B-A9HV	0.312362	0.434208	0.344406	0.35492	0.220766	0.35492	0.43378	0.312362	0.220766	0.430973
TCGA-3B-A9HX	0.473684	0.473684	0.473684	0.473684	0	0.473684	0.473684	0.473684	0	0.473684
TCGA-3B-A9HY	0.650183	0.761905	0.774892	0.588217	0	0.650183	0.761905	0.650183	0	0.761905
TCGA-3B-A9HZ	0.454545	0.435217	0.425991	0.401515	0.285385	0.423939	0.454545	0.465909	0.298871	0.425991
TCGA-3B-A9I0	0	0	0	0.321429	0	0	0	0.321429	0	0
TCGA-3B-A9I1	0.684444	0.654213	0.494875	0.573413	0.305305	0.66627	0.573413	0.684444	0.351351	0.888889
TCGA-3B-A9I3	0.207237	0.291667	0.210513	0.1848	0.188786	0.188332	0.201926	0.188096	0.192524	0.291667
TCGA-3C-AAAU	0.307692	0.307692	0.307692	0.173846	0.04	0.173846	0.307692	0.363524	0.727273	0
TCGA-3C-AALI	0.301612	0.257399	0.258681	0.250581	0.356566	0.256471	0.32666	0.259121	0.288414	0.325911
TCGA-3C-AALJ	0.12963	0.267713	0.267713	0.245142	0	0.245142	0.267713	0.267713	0	0
TCGA-3C-AALK	0.213272	0.209125	0.269808	0.25771	0.296951	0.252666	0.218997	0.204248	0.287856	0
TCGA-3E-AAAY	0.0700311	0.0700311	0.0727936	0.0727936	0.0334347	0.0727936	0.0700311	0.0700311	0.0334347	0.0989011
TCGA-3E-AAAZ	0.18832	0.192928	0.206758	0.206984	0.168079	0.217837	0.207047	0.192928	0.15311	0.170799
TCGA-3G-AB0O	0	0	0	0	0	0	0	0	0	0
TCGA-3G-AB0Q	0	0	0.257708	0	0.0967742	0	0	0	0	0
TCGA-3G-AB0T	0	0	0	0	0	0	0	0	0	0
TCGA-3G-AB14	0.25641	0.25641	0.25641	0.25641	0	0.25641	0.25641	0.25641	0	0.25641
TCGA-3G-AB19	0.272727	0.272727	0.272727	0.309441	0.308777	0.308777	0.272727	0.309441	0.272727	0
TCGA-3H-AB3K	0	0	0.534884	0.543304	0	0.534884	0	0.543304	0	0
TCGA-3H-AB3L	0.513514	0.513514	0.512709	0.512709	0.511905	0.512709	0.513514	0.513514	0	0.513514
TCGA-3H-AB3M	0.37931	0.348624	0.395062	0.264956	0	0.264956	0	0.398831	0.386905	0
TCGA-3H-AB3O	0	0	0.110784	0.110784	0.0882353	0.110784	0.133333	0.110784	0.0882353	0
TCGA-3H-AB3S	0	0	0	0.0769231	0.373418	0	0.269608	0.0769231	0.373418	0
TCGA-3H-AB3T	0	0	0	0.303225	0.205128	0.25	0.190041	0.352273	0.205128	0.189655
TCGA-3H-AB3U	0.577465	0.363636	0.602041	0.513222	0.577465	0.577465	0.08	0.44898	0.577465	0.107143
TCGA-3H-AB3X	0.231638	0.333333	0.295358	0.290963	0.333333	0.309437	0.333333	0.282486	0.333333	0
TCGA-3K-AAZ8	0.340062	0.379984	0.308985	0.342843	0.305347	0.374674	0.379383	0.3157	0.386239	0.235249
TCGA-3L-AA1B	0.271999	0.250644	0.241006	0.223246	0.235002	0.206234	0.280016	0.231978	0.251853	0
TCGA-3M-AB46	0.452464	0.310643	0.363806	0.356712	0.359726	0.378454	0.276693	0.32171	0.338003	0.518519
TCGA-3M-AB47	0.1452	0.169029	0.193308	0.186503	0.157177	0.184465	0.122893	0.182695	0.125043	0
TCGA-3P-A9WA	0.632353	0.390937	0.377658	0.40262	0.179742	0.400752	0.452433	0.419238	0.601015	0.348628
TCGA-3Q-A9WF	0	0.045977	0.0512143	0.0564516	0	0.0564516	0	0.0564516	0	0
TCGA-3R-A8YX	0.101307	0.12	0.141081	0.131735	0	0.124399	0	0	0.12	0.0821918
TCGA-3S-A8YW	0	0	0.446809	0.257557	0	0.257557	0	0.261335	0	0
TCGA-3S-AAYX	0	0	0	0	0	0	0	0	0	0
TCGA-3T-AA9L	0.0625	0	0.0625	0.0625	0	0.0625	0.0625	0.0625	0	0
TCGA-3U-A98D	0	0	0	0	0.265306	0.265306	0	0	0	0.630435
TCGA-3U-A98E	0.313878	0.3	0.320363	0.286667	0.313878	0.335725	0	0.24	0.313878	0.428571
TCGA-3U-A98F	0	0	0.866667	0.842105	0	0	0	0.842105	0	0
TCGA-3U-A98G	0	0	0	0	0	0	0	0	0	0
TCGA-3U-A98H	0.158273	0.158273	0.158273	0.181701	0.158273	0.158273	0.158273	0.205128	0.158273	0
TCGA-3U-A98I	0.375	0.310185	0.310185	0.287478	0.193103	0.375	0.375	0.287478	0.193103	0.375
TCGA-3U-A98J	0.197844	0	0.12426	0.354119	0	0.197844	0	0.12426	0	0
TCGA-3X-AAV9	0.115385	0	0.115385	0.134214	0	0.134214	0	0.131142	0	0.119048
TCGA-3X-AAVA	0.35	0.347222	0.4	0.4	0.366667	0.4	0.366667	0.4	0.366667	0
TCGA-3X-AAVB	0.31914	0.352273	0.352273	0.281021	0.281518	0.31914	0.352273	0.352273	0.281518	0.5
TCGA-3X-AAVC	0.527162	0.590909	0.419314	0.460384	0.36074	0.426664	0.590909	0.315147	0.36074	0.590909
TCGA-3X-AAVE	0	0	0.252802	0.273742	0.232877	0.232877	0	0.232877	0	0
TCGA-3Z-A93Z	0.24954	0.276408	0.264147	0.194598	0.192594	0.200869	0.231065	0.179225	0.218088	0.153846
TCGA-41-2571	0.389706	0.700935	0.417476	0.461316	0.317857	0.461316	0	0.502319	0.38005	0.700935
TCGA-41-2572	0.433155	0.433155	0.407467	0.416015	0.383244	0.39049	0.433155	0.433155	0.433155	0
TCGA-41-2573	0.432325	0.641509	0.386538	0.438352	0.304965	0.484621	0.146552	0.413729	0.2	0.542586
TCGA-41-2575	0.476436	0.561576	0.440575	0.432148	0	0.571429	0.571429	0.470141	0.381443	0.571429
TCGA-41-3392	0.252881	0.323944	0.321004	0.392677	0.238989	0.336116	0	0.5	0.323944	0
TCGA-41-3393	0.172429	0	0.248593	0.228392	0.187555	0.235955	0.24157	0.344828	0.156386	0
TCGA-41-3915	0.430769	0.423848	0.426088	0.487459	0.255846	0.348846	0.4	0.555263	0.280508	0.710526
TCGA-41-4097	0	0.382979	0.33697	0.366974	0	0.407279	0	0.407279	0	0.382979
TCGA-41-5651	0.374772	0.425333	0.445456	0.490958	0.4822	0.483223	0.365217	0.517183	0.405586	0
TCGA-41-6646	0.428571	0.335714	0.335714	0.392791	0.335714	0.390544	0.428571	0.50533	0.315552	0
TCGA-42-2582	0.292011	0.257823	0.22739	0.27432	0.190442	0.336315	0.414052	0.44186	0.10084	0.44186
TCGA-42-2587	0.415102	0.338476	0.277049	0.336852	0.314933	0.331833	0.413174	0.397493	0.263032	0.320527
TCGA-42-2588	0	0	0	0	0	0.443997	0.179487	0	0	0
TCGA-42-2589	0.391293	0.499555	0.476739	0.507565	0.570346	0.438018	0.546262	0.767808	0.530864	0.753425
TCGA-42-2590	0.365017	0.371639	0.275492	0.256108	0.304578	0.287289	0.384083	0.260073	0.365017	0.34638
TCGA-42-2591	0.527437	0.78673	0.583612	0.601024	0.447604	0.606827	0.78673	0.718898	0.434271	0.577519
TCGA-42-2593	0.57303	0.451054	0.442626	0.383745	0.191518	0.44586	0.57303	0.57303	0.191518	0.772727
TCGA-43-2576	0.224796	0.199766	0.225525	0.217866	0.222254	0.223619	0.259568	0.249469	0.233948	0.21235
TCGA-43-2578	0.406603	0.320441	0.345633	0.355118	0.334228	0.331377	0.444852	0.398976	0.372025	0.310282
TCGA-43-2581	0.198408	0.205508	0.205466	0.204953	0.202069	0.205794	0.229736	0.181799	0.169144	0.18393
TCGA-43-3394	0.354832	0	0.339032	0.364372	0.398691	0.347629	0.545651	0.408089	0.362278	0
TCGA-43-3920	0.411613	0.367411	0.380708	0.337705	0.3933	0.328677	0.389047	0.414558	0.301058	0.390368
TCGA-43-5668	0.271476	0.366632	0.2723	0.274065	0.261042	0.279029	0.268559	0.291818	0.26057	0.285647
TCGA-43-5670	0.454942	0.534884	0.337363	0.312945	0.215428	0.318793	0.375134	0.320884	0.215428	0.295515
TCGA-43-6143	0.408904	0.523782	0.376208	0.452165	0.445825	0.439666	0.71875	0.342948	0.323275	0.579963
TCGA-43-6647	0.0987697	0.161828	0.139671	0.133107	0.111285	0.128788	0.096057	0.135181	0.112639	0.152447
TCGA-43-6770	0.288285	0.290137	0.250806	0.269524	0.361616	0.250719	0.323545	0.287361	0.148515	0.247683
TCGA-43-6771	0.333567	0.277038	0.253951	0.312601	0.264052	0.30872	0.332681	0.335496	0.246102	0.214421
TCGA-43-6773	0.176471	0.138519	0.142662	0.0953577	0.164179	0.176471	0.143545	0.176471	0	0.176471
TCGA-43-7656	0.31473	0.288138	0.356282	0.371758	0.316853	0.348112	0.313312	0.430173	0.386905	0.313937
TCGA-43-7657	0.524705	0.535219	0.337457	0.223869	0.462687	0.292814	0.102041	0.54	0.462687	0
TCGA-43-7658	0.763158	0.415705	0.469549	0.421476	0.455027	0.439407	0.411187	0.374544	0.468663	0.763158
TCGA-43-8115	0.183969	0.185798	0.174178	0.183336	0.203219	0.202434	0.254905	0.218397	0.299541	0.172508
TCGA-43-8116	0.229278	0.247854	0.258239	0.213136	0.213647	0.242729	0.265413	0.234572	0.198634	0.387097
TCGA-43-8118	0.19187	0.17178	0.181314	0.191564	0.201731	0.175461	0.150342	0.166382	0.192943	0.201237
TCGA-43-A474	0.462336	0.350614	0.396467	0.400032	0.422239	0.390344	0.361914	0.45314	0.41115	0.345455
TCGA-43-A475	0.267117	0.144116	0.20305	0.20926	0.229267	0.219179	0.136713	0.166021	0.237223	0.258456
TCGA-43-A56U	0.112808	0.108335	0.110858	0.103125	0.0884616	0.101522	0.100353	0.10886	0.11576	0.0929159
TCGA-43-A56V	0.405229	0.305966	0.277913	0.28697	0.238199	0.261014	0.391971	0.317956	0.212641	0.392157
TCGA-44-2655	0.129309	0.105067	0.143011	0.142355	0.121403	0.158763	0.133431	0.14889	0.115873	0
TCGA-44-2656	0.21693	0.236124	0.201672	0.247015	0.230807	0.217827	0.226714	0.267659	0.203003	0.267781
TCGA-44-2657	0.156346	0.175845	0.14813	0.154364	0.1335	0.151244	0.142546	0.158823	0.136625	0.19758
TCGA-44-2659	0.313111	0.278414	0.293767	0.268711	0.407343	0.29114	0.426306	0.310485	0.307218	0.269859
TCGA-44-2661	0.129472	0.233463	0.129071	0.114723	0.162791	0.114723	0.0961538	0.100855	0.162791	0
TCGA-44-2662	0.181818	0.195556	0.193802	0.158585	0.160709	0.134597	0.142636	0.128953	0.168482	0.32
TCGA-44-2665	0.297101	0.215108	0.221716	0.2657	0.244241	0.226548	0	0.297101	0.259872	0.212051
TCGA-44-2666	0.212182	0.226562	0.231825	0.194193	0.226562	0.348575	0	0.178008	0.226562	0
TCGA-44-2668	0.155719	0.166281	0.175925	0.191713	0.197387	0.183764	0.159597	0.190892	0.177745	0.224673
TCGA-44-3396	0.193875	0.16396	0.161852	0.138269	0.175562	0.14496	0.171748	0.16881	0.131603	0.141085
TCGA-44-3398	0.101147	0.116975	0.0878715	0.0979588	0.0835979	0.101402	0.091336	0.0926389	0.100529	0.053121
TCGA-44-3917	0.385923	0.296977	0.359726	0.286171	0.293399	0.273353	0.322909	0.342757	0.302568	0.353846
TCGA-44-3918	0.194533	0.202804	0.191935	0.204874	0.175623	0.21156	0.235013	0.192579	0.158117	0.19696
TCGA-44-3919	0	0	0.215909	0.158282	0.232	0.228586	0.0847458	0.231818	0	0.148291
TCGA-44-4112	0.372538	0.33508	0.402891	0.344053	0.388466	0.359919	0.272381	0.371471	0.285505	0.297802
TCGA-44-5643	0.337152	0.365791	0.368683	0.281398	0.346209	0.324797	0.461971	0.301742	0.330368	0
TCGA-44-5644	0.464077	0.371483	0.411719	0.423713	0.417928	0.437365	0.618294	0.461767	0.402997	0.455631
TCGA-44-5645	0.267915	0.287161	0.249717	0.255482	0.288312	0.26606	0.267915	0.26272	0.288312	0.27907
TCGA-44-6144	0.295391	0.354596	0.289882	0.271998	0.23636	0.260267	0.318864	0.223022	0.210675	0.318236
TCGA-44-6145	0.164893	0.162641	0.178936	0.182735	0.162863	0.180931	0.17981	0.178487	0.174279	0.15126
TCGA-44-6146	0.333333	0.310062	0.34375	0.354167	0.34375	0.354167	0.354167	0	0.34375	0.265957
TCGA-44-6147	0.0765487	0.0927768	0.0884425	0.104795	0	0.0839282	0.0496183	0	0	0.118519
TCGA-44-6148	0	0.112195	0.20339	0	0	0	0	0.167785	0	0.20339
TCGA-44-6774	0.215113	0.180809	0.191456	0.19204	0.180501	0.201304	0.247158	0.208411	0.167569	0.245115
TCGA-44-6775	0.110593	0.0909091	0.124577	0.129691	0.128442	0.127111	0.0909091	0.168647	0.175194	0.0909091
TCGA-44-6776	0.282043	0.447581	0.299576	0.313049	0.285526	0.305985	0.35134	0.333995	0.306013	0.317266
TCGA-44-6777	0.125683	0.131951	0.139968	0.124448	0.154605	0.135011	0.150089	0.135694	0.1438	0.139633
TCGA-44-6778	0.218581	0.173378	0.216175	0.21014	0.209102	0.202442	0.183232	0.166254	0.240731	0.196874
TCGA-44-6779	0.391304	0.358351	0.358351	0.317941	0	0.391304	0.391304	0.391304	0	0.391304
TCGA-44-7659	0.279602	0.257683	0.239467	0.281881	0.316708	0.313292	0.247423	0.188889	0.326118	0.24537
TCGA-44-7660	0.272408	0.432169	0.263922	0.225807	0.243618	0.232	0.165028	0.326986	0.252022	0.237433
TCGA-44-7661	0.194485	0.197884	0.160354	0.1869	0.150415	0.169879	0.190093	0.190473	0.144249	0.159467
TCGA-44-7662	0.23397	0.228293	0.19389	0.227865	0.239901	0.221621	0.24436	0.23081	0.236729	0.217404
TCGA-44-7667	0.325551	0.303499	0.278804	0.306506	0.284259	0.282778	0.323839	0.291392	0.303324	0.278125
TCGA-44-7669	0.329471	0.404839	0.326401	0.313272	0.253162	0.321034	0.394492	0.289641	0.25199	0.199474
TCGA-44-7670	0.450437	0.323327	0.359836	0.342302	0.308345	0.343634	0.407845	0.342627	0.335084	0.273657
TCGA-44-7671	0.46175	0.486455	0.429706	0.426663	0.439383	0.416996	0.493947	0.45488	0.437567	0.362416
TCGA-44-7672	0.212015	0.222091	0.163169	0.150521	0.213217	0.147925	0.260264	0.173064	0.16283	0.0552147
TCGA-44-8117	0.375088	0.405134	0.388962	0.358223	0.356139	0.349599	0.379447	0.392383	0.388374	0.313681
TCGA-44-8119	0.411379	0.445761	0.371914	0.365882	0.39793	0.373428	0.377314	0.328544	0.363909	0.307122
TCGA-44-8120	0.303562	0.301869	0.282901	0.306869	0.300278	0.315131	0.304089	0.275668	0.257378	0.317788
TCGA-44-A479	0.167235	0.143798	0.143931	0.14581	0.131856	0.134374	0.182906	0.18262	0.13345	0.151409
TCGA-44-A47A	0.261153	0.214119	0.228863	0.202647	0.168429	0.176873	0.171684	0.140026	0.281541	0.0970149
TCGA-44-A47B	0.318681	0	0.301144	0.328906	0.263158	0.318681	0	0	0	0.33913
TCGA-44-A47F	0.202622	0.41875	0.177251	0.152905	0.247685	0.170342	0.4375	0.188929	0.23656	0
TCGA-44-A47G	0.153402	0.16873	0.172349	0.161168	0.043956	0.1253	0.113095	0.152863	0.155556	0.142857
TCGA-44-A4SS	0.172762	0.142862	0.175242	0.162908	0.125657	0.166508	0.185624	0.159181	0.13153	0.18662
TCGA-44-A4SU	0.398064	0.415133	0.291746	0.274834	0.145282	0.272278	0.331308	0.311171	0.164708	0.505837
TCGA-46-3765	0.287143	0.358384	0.246048	0.284792	0.237193	0.305334	0.330769	0.350492	0.185966	0.461538
TCGA-46-3767	0.201087	0.26087	0.162128	0.167866	0.102362	0.18477	0.201087	0.179103	0.12261	0.26087
TCGA-46-3768	0.546416	0.489589	0.426265	0.404	0.518148	0.431065	0.438628	0.430445	0.226721	0.460849
TCGA-46-3769	0.365158	0.301249	0.255437	0.298024	0.29729	0.307255	0.324112	0.28218	0.281791	0.298117
TCGA-46-6025	0.323223	0.40004	0.366683	0.322129	0.311198	0.347709	0.576577	0.469674	0.330531	0.440617
TCGA-46-6026	0.575446	0.505064	0.502766	0.340213	0.752045	0.343211	0.46281	0.315882	0.643665	0
TCGA-49-4486	0.254835	0.204927	0.22045	0.222379	0.140763	0.250838	0.307044	0.220735	0.24089	0.237053
TCGA-49-4487	0.107695	0.105591	0.110629	0.13077	0.159021	0.132837	0.0816059	0.113794	0.144094	0.0850841
TCGA-49-4488	0.366059	0.212932	0.30156	0.412909	0.343786	0.354014	0.505489	0.41776	0.306066	0.277423
TCGA-49-4490	0.316757	0.338389	0.277135	0.271053	0.0986842	0.245905	0.525	0.466848	0.108911	0.321822
TCGA-49-4494	0.343933	0.348731	0.309117	0.267017	0.262226	0.279334	0.230528	0.335659	0.223835	0.465116
TCGA-49-4501	0.0526316	0.102041	0.0773362	0.158039	0.0534759	0.210743	0.102041	0.102041	0.0534759	0
TCGA-49-4505	0.204507	0.358482	0.267179	0.214972	0.209181	0.22364	0.280439	0.168649	0.209181	0.321309
TCGA-49-4506	0.195635	0.166588	0.179481	0.187563	0.203467	0.156337	0.230769	0.172989	0.207125	0.131783
TCGA-49-4507	0.234936	0.186355	0.258102	0.216261	0.204314	0.199893	0.222222	0.176437	0.22912	0.17373
TCGA-49-4510	0.5	0.474565	0.468392	0.407407	0.545181	0.426714	0.5	0.410101	0.5	0.590361
TCGA-49-4512	0.21978	0	0.133333	0.218554	0.139837	0.182223	0	0	0.0857506	0
TCGA-49-4514	0.181226	0.174055	0.169517	0.169197	0.167444	0.173305	0.195876	0.173375	0.157188	0.214336
TCGA-49-6742	0.201704	0.300145	0.223662	0.260094	0.222807	0.26067	0.337033	0.290263	0.241417	0.405253
TCGA-49-6743	0.210729	0.175914	0.168782	0.173326	0.195622	0.182585	0.202197	0.203392	0.189536	0.166388
TCGA-49-6744	0.0971601	0.110778	0.11975	0.0881497	0.126548	0.120464	0.103402	0.0839786	0.107485	0.0595238
TCGA-49-6745	0.227568	0.252758	0.207053	0.187406	0.182645	0.204583	0.116346	0.192409	0.161911	0.193069
TCGA-49-6761	0.100887	0.120833	0.190264	0.190896	0.168824	0.174966	0.143296	0.152003	0.199662	0.16
TCGA-49-6767	0.228647	0.230711	0.267664	0.236864	0.359568	0.278328	0.31174	0.223222	0.24894	0.239043
TCGA-49-AAQV	0.296296	0.149444	0.116914	0.116914	0	0.136387	0.182499	0.137017	0.0460526	0.296296
TCGA-49-AAR0	0.22006	0.265188	0.270497	0.243473	0.13185	0.196036	0.280707	0.280279	0.13743	0.315789
TCGA-49-AAR2	0.315617	0.297454	0.322243	0.307016	0.367361	0.334687	0.342056	0.369306	0.330872	0.303611
TCGA-49-AAR3	0.0921053	0.0921053	0.0912876	0.10317	0.139439	0.10867	0.13916	0.106043	0.148148	0.0777126
TCGA-49-AAR4	0.115679	0.112635	0.125241	0.119562	0.110886	0.120663	0.136463	0.110943	0.105647	0.108283
TCGA-49-AAR9	0.360112	0.364023	0.347457	0.342644	0.32961	0.330925	0.298395	0.365014	0.300926	0.372301
TCGA-49-AARE	0.298493	0.248646	0.247887	0.256936	0.235778	0.250116	0.295928	0.265219	0.238886	0.284964
TCGA-49-AARN	0.130574	0.141338	0.143568	0.152719	0.142937	0.15907	0.178751	0.157774	0.11743	0.129979
TCGA-49-AARO	0.173722	0.162596	0.207278	0.208458	0.198456	0.206369	0.18475	0.211532	0.229942	0.226772
TCGA-49-AARQ	0.314995	0.301525	0.315327	0.306999	0.378081	0.287048	0.330834	0.281379	0.310062	0.459788
TCGA-49-AARR	0	0	0.148936	0.148936	0	0	0	0.148936	0	0
TCGA-4A-A93W	0.337753	0.618421	0.419575	0.35264	0.269303	0.349848	0.337349	0.375376	0.299004	0
TCGA-4A-A93X	0.497484	0.0424528	0.53987	0.565734	0.362205	0.497319	0.637346	0.312893	0.583333	0.873563
TCGA-4A-A93Y	0	0	0	0	0	0	0	0	0	0
TCGA-4B-A93V	0.495271	0.518509	0.569998	0.443705	0.397826	0.386351	0.517707	0.358277	0.416532	0.612903
TCGA-4C-A93U	0.329412	0.367831	0.342788	0.33971	0.329412	0.32033	0	0.210526	0.329412	0
TCGA-4E-A92E	0.389458	0.421435	0.365489	0.367755	0.388132	0.368578	0.391826	0.394233	0.393114	0.40044
TCGA-4G-AAZO	0.23218	0.356481	0.249135	0.249308	0.137004	0.255278	0.241379	0.299883	0	0
TCGA-4G-AAZT	0.4	0.404762	0.404762	0.404762	0.432962	0.404762	0.404762	0.4	0.432962	0
TCGA-4H-AAAK	0.351351	0.351351	0.351351	0.442005	0.416667	0.442005	0.666667	0.478228	0	0
TCGA-4J-AA1J	0.282845	0.19949	0.231861	0.24738	0.242569	0.257197	0.236932	0.250687	0.31856	0.239583
TCGA-4K-AA1G	0.714286	0.714286	0.714286	0.714286	0.221311	0.714286	0	0.714286	0	0
TCGA-4K-AA1H	0.120879	0.120879	0.120879	0.120879	0.120879	0.120879	0.120879	0.120879	0.120879	0.05
TCGA-4K-AA1I	0	0.174863	0.122581	0	0.0726257	0	0	0	0	0
TCGA-4K-AAAL	0.0769231	0.0769231	0.0769231	0.115781	0.0769231	0.0769231	0.0769231	0.0769231	0.0769231	0
TCGA-4L-AA1F	0	0.211538	0.146038	0.130692	0	0.146038	0.211538	0.211538	0.133292	0
TCGA-4N-A93T	0.510084	0.381849	0.381819	0.414556	0.491451	0.35598	0.636187	0.434031	0.491451	0.388889
TCGA-4P-AA8J	0.165604	0.160973	0.159798	0.16883	0.171429	0.189357	0.189655	0.169228	0.145252	0.156677
TCGA-4R-AA8I	0.372024	0.347075	0.357695	0.380809	0.343722	0.382431	0.457367	0.432792	0.36328	0.381645
TCGA-4T-AA8H	0.264387	0.313382	0.261875	0.250026	0.305795	0.268799	0.29863	0.356195	0.414138	0.241935
TCGA-4V-A9QI	0	0	0	0	0	0	0	0	0	0
TCGA-4V-A9QJ	0.0789548	0.0857143	0.0789548	0.0789548	0	0.0729776	0.0857143	0.0857143	0.060241	0.0857143
TCGA-4V-A9QL	0	0	0.105263	0.105263	0.105263	0.105263	0	0	0	0
TCGA-4V-A9QM	0.266667	0	0	0.266667	0	0.266667	0	0.266667	0	0
TCGA-4V-A9QN	0	0	0	0.5625	0	0	0	0.5625	0	0
TCGA-4V-A9QQ	0.12	0.12	0.09125	0.12	0.12	0.12	0.0928947	0.12	0.12	0.0864905
TCGA-4V-A9QR	0	0	0.0935345	0	0	0	0	0.0774648	0	0
TCGA-4V-A9QS	0	0	0	0	0	0	0	0	0.0752688	0
TCGA-4V-A9QT	0	0	0	0	0	0	0	0	0	0
TCGA-4V-A9QU	0.0421053	0	0	0.0421053	0	0.0421053	0	0	0	0
TCGA-4V-A9QW	0	0	0.0833333	0.0833333	0	0.102137	0	0.122807	0	0
TCGA-4V-A9QX	0	0.12766	0	0	0	0	0	0	0	0.12766
TCGA-4W-AA9R	0.581395	0.400394	0.359804	0.381198	0	0.337867	0.581395	0.337867	0.446667	0.440698
TCGA-4W-AA9S	0	0	0.226018	0.252414	0	0.222039	0	0.344828	0	0.336957
TCGA-4W-AA9T	0.555385	0.471267	0.38276	0.366839	0.209677	0.336412	0.25	0.471267	0	0.30303
TCGA-4X-A9F9	0	0	0	0	0	0	0	0	0	0
TCGA-4X-A9FA	0	0	0.247054	0.42268	0.348837	0.385759	0	0	0.348837	0
TCGA-4X-A9FB	0	0	0	0	0	0	0	0.0952381	0	0
TCGA-4X-A9FC	0	0	0	0	0	0	0	0	0	0
TCGA-4X-A9FD	0.116279	0.142157	0.116279	0.122765	0.148841	0.118746	0	0	0.148841	0
TCGA-4Z-AA7M	0.480983	0.386375	0.357384	0.348078	0.329535	0.336299	0.328006	0.342469	0.379947	0.345294
TCGA-4Z-AA7N	0	0	0	0	0	0	0	0	0	0.0632911
TCGA-4Z-AA7O	0.334996	0.345455	0.328	0.419376	0.24139	0.342075	0.502286	0.371795	0.402135	0
TCGA-4Z-AA7Q	0.202127	0.263995	0.143371	0.159506	0.103351	0.201369	0.232623	0.194408	0.0943396	0.286714
TCGA-4Z-AA7R	0.450286	0.44804	0.452713	0.395291	0.656146	0.442661	0.506642	0.541321	0.617664	0.53417
TCGA-4Z-AA7S	0.412167	0	0.328349	0.440927	0.210084	0.503497	0.545455	0.430622	0.207792	0.449438
TCGA-4Z-AA7W	0.203065	0.168312	0.227157	0.199853	0.223851	0.226377	0.21269	0.1859	0.192491	0.214531
TCGA-4Z-AA7Y	0.473467	0.568758	0.489571	0.455673	0.444109	0.485235	0.476873	0.545029	0.451996	0.345631
TCGA-4Z-AA80	0.253989	0.1725	0.23015	0.200653	0.222103	0.219577	0.26143	0.283057	0.227528	0.181818
TCGA-4Z-AA81	0.305504	0.322783	0.298861	0.291797	0.391189	0.314788	0.336304	0.322108	0.320279	0.217262
TCGA-4Z-AA82	0.107143	0.390238	0.183201	0.196259	0.154632	0.215974	0.107143	0.187566	0.161526	0.305785
TCGA-4Z-AA83	0	0.703426	0.575118	0.53444	0.45098	0.534237	0.618902	0.556282	0	0.436047
TCGA-4Z-AA84	0.3648	0.366998	0.332276	0.334824	0.261137	0.352227	0.414629	0.357038	0.236866	0.437621
TCGA-4Z-AA86	0.23351	0.211788	0.193268	0.185981	0.139935	0.178723	0.155985	0.146977	0.100965	0.136345
TCGA-4Z-AA87	0.323715	0.32614	0.362831	0.396108	0.187486	0.41918	0.454051	0.372911	0.218247	0.563681
TCGA-4Z-AA89	0.173275	0.288891	0.248623	0.212857	0.23851	0.238148	0.248741	0.239808	0.252512	0.129412
TCGA-50-5044	0.101946	0.111742	0.11386	0.127728	0.109738	0.104454	0.121212	0.171717	0.0962056	0.108911
TCGA-50-5045	0.151556	0.144749	0.142713	0.159844	0.166332	0.164961	0.180512	0.196111	0.153033	0.143089
TCGA-50-5049	0.139709	0.153296	0.145002	0.151634	0.124252	0.140989	0.149884	0.155819	0.131447	0.106373
TCGA-50-5051	0.408599	0.350389	0.375623	0.345692	0.432669	0.363086	0.386575	0.371329	0.412297	0
TCGA-50-5055	0	0	0	0	0.0789474	0	0	0	0.0789474	0
TCGA-50-5066	0.175141	0.200289	0.140528	0.176322	0.14736	0.163588	0.137931	0.150512	0.0846824	0
TCGA-50-5068	0.168775	0.122646	0.178852	0.210217	0.177764	0.183072	0	0	0.300568	0
TCGA-50-5072	0.218715	0.349888	0.274374	0.257674	0.246536	0.262373	0.203052	0.32592	0.227079	0
TCGA-50-5930	0.203786	0.226138	0.211147	0.210038	0.201873	0.231239	0.197692	0.207887	0.204532	0.172814
TCGA-50-5931	0.457101	0.490593	0.505139	0.512006	0.353946	0.480541	0.625806	0.574119	0.439225	0.495425
TCGA-50-5932	0.47885	0.612832	0.526471	0.496805	0.437269	0.417222	0.398033	0.446252	0.481107	0.347826
TCGA-50-5933	0.187693	0.16955	0.171456	0.188305	0.167514	0.178345	0.22329	0.187794	0.168389	0.142379
TCGA-50-5935	0.15064	0.106337	0.108964	0.120022	0.116279	0.135269	0.145697	0.145697	0.270218	0.0803213
TCGA-50-5936	0.253782	0.346894	0.321367	0.36292	0.243755	0.348893	0.25	0.343296	0.139535	0
TCGA-50-5939	0.217849	0.233115	0.225891	0.211164	0.176651	0.203928	0.246774	0.21857	0.154171	0.3
TCGA-50-5941	0.201618	0.1906	0.191559	0.138402	0.146165	0.151516	0.168017	0.139901	0.167564	0.154834
TCGA-50-5942	0.362745	0.362745	0.362745	0.22976	0.355447	0.269222	0.571429	0	0.362745	0.0659341
TCGA-50-5944	0.45063	0.337979	0.370195	0.344417	0.205563	0.380996	0.607143	0.318151	0.273196	0.607143
TCGA-50-5946	0.297069	0.310049	0.290557	0.26615	0.316377	0.273014	0.289524	0.238209	0.254526	0.404494
TCGA-50-6590	0.262793	0.212143	0.224158	0.229973	0.227284	0.239035	0.216001	0.241493	0.240913	0.189359
TCGA-50-6591	0.92246	0.56123	0.56123	0.56123	0.0708661	0.397775	0	0.56123	0	0
TCGA-50-6592	0.182129	0.222187	0.176922	0.169142	0.195456	0.186158	0.209998	0.168814	0.176827	0.167498
TCGA-50-6593	0.215647	0.211024	0.217733	0.187616	0.130772	0.210168	0.229301	0.186132	0.112602	0.23608
TCGA-50-6594	0.318264	0.379273	0.306634	0.312327	0.333024	0.311759	0.431081	0.282566	0.394395	0.416358
TCGA-50-6595	0.242246	0.182308	0.166006	0.17661	0.178727	0.197838	0.0857143	0.233984	0.178727	0.0541667
TCGA-50-6597	0.130435	0	0.250253	0.130435	0.212433	0.191151	0.130435	0.130435	0.212433	0
TCGA-50-6673	0.507937	0.411921	0.359731	0.360542	0.5	0.414519	0.507937	0.364781	0	0.368911
TCGA-50-7109	0.298387	0.361062	0.197053	0.200873	0.202833	0.223843	0.208791	0.236043	0.202833	0
TCGA-50-8457	0	0	0.274504	0.337923	0.240179	0.275546	0.34	0.276383	0.240179	0.321839
TCGA-50-8459	0.369697	0.350569	0.319486	0.286042	0.306703	0.261127	0.569828	0.288328	0.416993	0
TCGA-50-8460	0.125	0.159139	0.147467	0.151584	0.159817	0.142409	0.125	0.125	0.159817	0.202744
TCGA-51-4079	0.343557	0.250149	0.288062	0.290916	0.246811	0.26996	0.297628	0.283491	0.254158	0
TCGA-51-4080	0	0.396419	0.38594	0.435023	0.428168	0.429575	0.293138	0.478276	0.431528	0.530321
TCGA-51-4081	0.438074	0.357986	0.392518	0.426844	0.309247	0.386835	0.403088	0.423015	0.305404	0.39254
TCGA-51-6867	0.453647	0.430558	0.411636	0.402749	0.470606	0.396579	0.458207	0.500637	0.453924	0.43031
TCGA-52-7622	0.185257	0.232064	0.15837	0.18442	0.18516	0.155594	0.177027	0.188951	0.174611	0.196093
TCGA-52-7809	0.325589	0.335255	0.3368	0.365888	0.368651	0.37386	0.298317	0.37108	0.396427	0.223293
TCGA-52-7810	0.432328	0.474377	0.383549	0.351786	0.3911	0.372493	0.476296	0.332947	0.444453	0.290811
TCGA-52-7811	0.196314	0.17869	0.208253	0.174619	0.263357	0.283586	0.257084	0.201137	0.168537	0.0962963
TCGA-52-7812	0.283446	0.318159	0.270595	0.253302	0.287987	0.252334	0.28305	0.259806	0.298801	0
TCGA-53-7624	0.414077	0.451196	0.420321	0.429254	0.387988	0.449165	0.513657	0.485814	0.381705	0.368745
TCGA-53-7626	0.183065	0.211597	0.203114	0.197026	0.238455	0.21931	0.139657	0.190308	0.187968	0.186355
TCGA-53-7813	0.186819	0.226189	0.280716	0.253077	0.219926	0.221228	0.288361	0.239998	0.198543	0.296703
TCGA-53-A4EZ	0.328973	0.276038	0.296629	0.287807	0.322773	0.29597	0.354128	0.310522	0.289407	0.525
TCGA-55-1592	0.29016	0.299514	0.268946	0.260478	0.280963	0.270863	0.288956	0.282335	0.23742	0.336403
TCGA-55-1594	0.361948	0.31141	0.372089	0.389253	0.198315	0.372089	0.389981	0.365593	0.196629	0.583333
TCGA-55-1595	0.307035	0.317308	0.260815	0.22667	0.324325	0.271258	0.232146	0.291979	0.294483	0.26821
TCGA-55-1596	0.403386	0.539806	0.414976	0.39993	0.357535	0.404205	0.423033	0.354467	0.234535	0.319374
TCGA-55-5899	0.372328	0.423704	0.386228	0.362667	0.310537	0.35606	0.62407	0.395801	0.360818	0.538141
TCGA-55-6543	0	0.116667	0.0776632	0.116667	0	0.185884	0	0.116667	0.220779	0.349206
TCGA-55-6642	0	0.21444	0.213172	0.198507	0.193079	0.174048	0.18511	0.245669	0.343422	0.21444
TCGA-55-6712	0.161415	0.105002	0.170958	0.164206	0.101587	0.17222	0	0.163147	0	0.244565
TCGA-55-6968	0.260713	0.197774	0.227304	0.269977	0.257189	0.251932	0.269526	0.288436	0.240708	0.322286
TCGA-55-6969	0.205671	0.1905	0.17566	0.184003	0.159288	0.188743	0.210221	0.178942	0.209644	0.201117
TCGA-55-6970	0.282958	0.267255	0.360912	0.281799	0.257471	0.282299	0.23537	0.21954	0.263091	0
TCGA-55-6971	0	0.170732	0.182019	0.184156	0.171573	0.175532	0	0.175109	0.0955414	0.208007
TCGA-55-6972	0.485221	0.145896	0.317507	0.306708	0.286344	0.244275	0.368421	0.278853	0.273053	0
TCGA-55-6975	0.21417	0.321429	0.245067	0.204702	0.270347	0.232898	0.316897	0.215292	0.321429	0.272494
TCGA-55-6978	0	0	0	0	0	0	0	0	0	0
TCGA-55-6979	0.0871999	0.0780142	0.103779	0.106857	0.0830223	0.10968	0.107016	0.106882	0.124238	0
TCGA-55-6980	0	0	0	0	0.2	0.2	0	0	0.2	0
TCGA-55-6981	0.289039	0.116279	0.251242	0.204583	0	0.158507	0.162791	0	0.214015	0.233745
TCGA-55-6982	0.0987931	0.100886	0.106351	0.0959004	0.136155	0.123422	0.124207	0.102476	0.12461	0.153846
TCGA-55-6983	0.3125	0.3125	0.240666	0.183694	0.198106	0.183503	0.3125	0.207974	0.21108	0
TCGA-55-6984	0.357143	0.241071	0.241071	0.241071	0.241071	0.227381	0.241071	0.241071	0.241071	0
TCGA-55-6985	0.21248	0.209626	0.241647	0.241182	0.235042	0.232489	0.279221	0.224995	0.223675	0.205331
TCGA-55-6986	0	0	0.140625	0.140625	0.184615	0	0	0	0	0.136364
TCGA-55-6987	0.0935538	0.1	0.139931	0.138204	0.0991312	0.171051	0	0.179027	0.0991312	0.0810811
TCGA-55-7227	0.297071	0.29704	0.298262	0.290534	0.25488	0.286075	0.44	0.270096	0.271464	0.44
TCGA-55-7281	0.287567	0.244726	0.26788	0.262963	0.344321	0.279032	0.314739	0.260527	0.30781	0.249765
TCGA-55-7283	0.22235	0.200795	0.18908	0.183123	0.198136	0.183998	0.199659	0.241179	0.189607	0.18
TCGA-55-7284	0.357143	0.348571	0.315066	0.243951	0.277337	0.252223	0.357143	0.262331	0.357143	0
TCGA-55-7570	0.31431	0.338904	0.33429	0.303572	0.271429	0.266206	0.323609	0.292685	0.289354	0.540147
TCGA-55-7573	0	0	0.249544	0.236603	0	0.249544	0.191489	0.179078	0	0
TCGA-55-7574	0.0988792	0.164718	0.118036	0.113401	0.144412	0.132974	0.127129	0.102532	0.129444	0.0964826
TCGA-55-7576	0.316235	0.306787	0.221995	0.24383	0.206378	0.209782	0.230578	0.275366	0.201251	0.193051
TCGA-55-7724	0.121725	0.117503	0.097933	0.112739	0.0966617	0.103149	0.138672	0.144015	0.0886653	0.12457
TCGA-55-7725	0.236379	0.252797	0.210447	0.226784	0.212092	0.280979	0.226016	0.227652	0.154448	0
TCGA-55-7726	0.335519	0.291822	0.229111	0.259831	0.212839	0.242798	0.25949	0.298152	0.240283	0.209677
TCGA-55-7727	0.325845	0.283591	0.306947	0.260547	0.30229	0.265674	0.262102	0.241048	0.413611	0.394089
TCGA-55-7728	0.218014	0.316079	0.183156	0.193509	0.263159	0.189306	0.324037	0.247098	0.263159	0
TCGA-55-7815	0.182253	0.173629	0.162917	0.161156	0.217794	0.159295	0.186924	0.182477	0.161914	0.196513
TCGA-55-7903	0.307379	0.377473	0.268406	0.331432	0.258797	0.2755	0	0.395924	0.260124	0
TCGA-55-7907	0.273644	0.276368	0.302821	0.284548	0.301082	0.272772	0.285142	0.316577	0.288247	0.323131
TCGA-55-7910	0.326079	0.433128	0.350769	0.312496	0.319867	0.343164	0.323237	0.325188	0.289412	0.397868
TCGA-55-7911	0.20884	0.195045	0.196595	0.195991	0.237626	0.201669	0.253703	0.277008	0.210317	0.150304
TCGA-55-7913	0.225714	0.31005	0.206866	0.2361	0.231029	0.23302	0.15679	0.209281	0.209688	0.179487
TCGA-55-7914	0.27229	0.276232	0.307382	0.305851	0.304176	0.345762	0.306889	0.305722	0.302769	0.355828
TCGA-55-7994	0.419107	0.391919	0.390087	0.375356	0.390925	0.38385	0.381545	0.385967	0.371858	0.256151
TCGA-55-7995	0.349117	0.321707	0.285253	0.273939	0.261644	0.27603	0.308815	0.29774	0.310093	0.233908
TCGA-55-8085	0.236659	0.242835	0.239779	0.243657	0.255599	0.25628	0.236177	0.228057	0.266545	0.265851
TCGA-55-8087	0.164557	0	0.164557	0	0	0	0	0	0	0
TCGA-55-8089	0.160276	0.167622	0.164039	0.160872	0.173044	0.168305	0.15301	0.157506	0.168523	0.110907
TCGA-55-8090	0.244616	0.307327	0.272606	0.236819	0.166667	0.245541	0.171569	0.231959	0.17	0
TCGA-55-8091	0	0.166667	0.166667	0.166667	0	0.166667	0.166667	0.166667	0	0
TCGA-55-8092	0.248793	0.26177	0.209486	0.217844	0.231199	0.233195	0.22189	0.24782	0.223676	0.166458
TCGA-55-8094	0.43434	0.594811	0.43297	0.415807	0.362146	0.374514	0.751781	0.435374	0.375947	0.880342
TCGA-55-8096	0.25532	0.332226	0.22293	0.228959	0.173607	0.210798	0.271577	0.318165	0.213389	0
TCGA-55-8097	0.25737	0.23154	0.220985	0.221144	0.288564	0.203843	0.242767	0.218912	0.173109	0.181818
TCGA-55-8203	0.250698	0.245707	0.26251	0.245354	0.284664	0.243327	0.239262	0.243241	0.237213	0
TCGA-55-8204	0.192436	0.213826	0.184663	0.188245	0.143952	0.188118	0.164063	0.200637	0.165244	0.207059
TCGA-55-8205	0.202162	0.135613	0.13619	0.149384	0.180865	0.161271	0.142315	0.140521	0.164872	0.215632
TCGA-55-8206	0.218881	0	0.181818	0.187719	0.172996	0.170983	0	0.174603	0.172996	0
TCGA-55-8207	0.313866	0.218483	0.316324	0.305543	0.297056	0.295419	0.32112	0.277863	0.365043	0
TCGA-55-8208	0.121859	0.132452	0.103078	0.100346	0.0703846	0.0943506	0.127526	0.113024	0.0755876	0.205882
TCGA-55-8299	0.0607074	0.0740755	0.0721429	0.0672393	0.0579504	0.067232	0.070342	0.0746953	0.0715422	0.0762712
TCGA-55-8301	0.178097	0.208688	0.163005	0.171398	0.117952	0.154136	0.185513	0.187511	0.217381	0.233886
TCGA-55-8302	0.192364	0.176135	0.161111	0.171452	0.154233	0.150912	0.213453	0.182476	0.165401	0.317364
TCGA-55-8505	0.216807	0.289992	0.243356	0.289992	0.166947	0.166947	0.216807	0.216807	0.216807	0
TCGA-55-8506	0.276958	0.231231	0.238073	0.253536	0.250183	0.250279	0.279247	0.271264	0.23385	0.321646
TCGA-55-8507	0.33784	0.309423	0.340475	0.318671	0.333638	0.345731	0.381802	0.343643	0.323944	0.356719
TCGA-55-8508	0.297856	0.296154	0.243192	0.299711	0.305153	0.277316	0.348113	0.325265	0.406763	0.190931
TCGA-55-8510	0.184553	0.282147	0.200576	0.199335	0.192584	0.208357	0.246674	0.231709	0.159646	0.17561
TCGA-55-8511	0.166468	0.153738	0.1788	0.177357	0.190887	0.186562	0.192547	0.179742	0.221012	0.178234
TCGA-55-8512	0.131579	0	0.131579	0.131579	0	0.15	0	0	0	0
TCGA-55-8513	0	0	0	0	0	0	0	0	0	0
TCGA-55-8514	0.364873	0.362159	0.364169	0.319034	0.274306	0.345537	0.299123	0.359068	0.272936	0.458333
TCGA-55-8614	0.276845	0.301442	0.265313	0.230864	0.224509	0.201267	0.210622	0.260894	0.290476	0.428571
TCGA-55-8615	0.55132	0.576887	0.409128	0.430384	0.30649	0.327064	0.557945	0.578541	0.293831	0
TCGA-55-8616	0.215445	0.318368	0.237027	0.272135	0.292077	0.289648	0.311299	0.263081	0.337061	0.427792
TCGA-55-8619	0	0	0.0779221	0.0750058	0	0.0720103	0.0663507	0	0	0.0779221
TCGA-55-8620	0.345347	0.354273	0.306285	0.332421	0.313692	0.324322	0.355536	0.302427	0.367926	0.397176
TCGA-55-8621	0.0495868	0.0562225	0.0785054	0.0668206	0.0628931	0.069998	0.0768017	0.089254	0.0628931	0.0382514
TCGA-55-A48X	0.112395	0.118453	0.121085	0.129548	0.12524	0.129563	0.126608	0.140257	0.141183	0.124942
TCGA-55-A48Y	0.211238	0.152916	0.176267	0.167282	0.18031	0.167789	0.237452	0.212721	0.194742	0.136776
TCGA-55-A48Z	0.225995	0.257302	0.244909	0.23399	0.267738	0.25443	0.356065	0.393665	0.197294	0.405405
TCGA-55-A490	0.274471	0.336018	0.298152	0.303137	0.314622	0.322557	0.307783	0.304391	0.293253	0.23545
TCGA-55-A491	0.319089	0.239662	0.278241	0.295831	0.265459	0.282588	0.336393	0.347444	0.24978	0.275268
TCGA-55-A492	0.207529	0.1	0.21793	0.204168	0.189966	0.191558	0.14342	0.175145	0.17419	0.206689
TCGA-55-A493	0.169163	0.211538	0.174433	0.145786	0.179384	0.149179	0.170144	0.180694	0.147341	0.333333
TCGA-55-A494	0.419872	0.373086	0.390959	0.426502	0.424247	0.383453	0.402885	0.3669	0.664949	0.181909
TCGA-55-A4DF	0.285454	0.204157	0.213316	0.19973	0.184505	0.200111	0.166783	0.208171	0.18684	0.230813
TCGA-55-A4DG	0.264329	0.313517	0.282015	0.280498	0.297305	0.276059	0.29642	0.279767	0.323838	0.370582
TCGA-55-A57B	0.294118	0.189542	0.294118	0.294118	0	0.294118	0.294118	0.294118	0	0.294118
TCGA-56-1622	0.622194	0.698012	0.547237	0.447968	0.60992	0.566804	0.641382	0.475439	0.497116	0.615086
TCGA-56-5897	0.157895	0.13882	0.14077	0.169994	0.107527	0.160818	0.219178	0.157632	0.10006	0.208333
TCGA-56-5898	0.281317	0.265324	0.290984	0.265963	0.285283	0.320955	0.340909	0.303845	0.255721	0.340909
TCGA-56-6545	0.255969	0.20083	0.243281	0.226535	0.270532	0.25642	0.224394	0.250096	0.232943	0.373134
TCGA-56-6546	0.237942	0.263621	0.221963	0.223594	0.146425	0.239375	0.241541	0.232098	0.190855	0.228868
TCGA-56-7221	0.263417	0.336994	0.349407	0.310005	0.242908	0.322136	0.362945	0.340552	0.336243	0.348608
TCGA-56-7222	0.433919	0.404362	0.330375	0.403601	0.369226	0.388249	0.419014	0.40308	0.402732	0.483052
TCGA-56-7223	0.676496	0.770515	0.63239	0.605719	0.693157	0.609076	0.726377	0.6287	0.555816	0.674621
TCGA-56-7579	0.334478	0.397222	0.330096	0.385986	0.43387	0.399039	0.413075	0.422943	0.43387	0.311111
TCGA-56-7580	0.246136	0.25976	0.218402	0.244895	0.27855	0.255538	0.305448	0.281591	0.258445	0.282795
TCGA-56-7582	0.426898	0.440865	0.49693	0.470344	0.350017	0.427031	0.44351	0.489174	0.223082	0.730769
TCGA-56-7730	0.528425	0.486571	0.409885	0.404139	0.552513	0.419208	0.476121	0.358637	0.508144	0.512679
TCGA-56-7731	0.0804902	0.101175	0.0916208	0.0880988	0.0975941	0.0947936	0.0809249	0.115044	0.0858245	0.115385
TCGA-56-7822	0.246747	0.25253	0.220733	0.234636	0.255504	0.234863	0.251755	0.217711	0.254852	0.242159
TCGA-56-7823	0.5389	0.387683	0.533215	0.468057	0.477703	0.467622	0.558184	0.476432	0.457148	0.860934
TCGA-56-8082	0.353867	0.515481	0.31404	0.348949	0.355769	0.406261	0.349814	0.340817	0.331797	0.234636
TCGA-56-8083	0	0.588294	0.370838	0.497764	0.453137	0.420458	0.551724	0.438297	0.434555	0.325
TCGA-56-8201	0.20374	0.244734	0.196866	0.215935	0.141422	0.207579	0.316766	0.275569	0.222334	0.39207
TCGA-56-8304	0.341197	0.31439	0.281782	0.308969	0.293346	0.301364	0.325467	0.295364	0.256552	0.314181
TCGA-56-8305	0.214671	0.260417	0.347446	0.315133	0.319971	0.276655	0.279694	0.32407	0.334129	0.407242
TCGA-56-8307	0.317074	0.39275	0.333464	0.33801	0.322984	0.358072	0.377577	0.317573	0.286253	0.368598
TCGA-56-8308	0.312291	0.217433	0.271186	0.271073	0.173244	0.267184	0.235348	0.273304	0.248677	0.18642
TCGA-56-8309	0.12632	0.149138	0.127757	0.156264	0.114649	0.141179	0.153497	0.131463	0.10782	0.132494
TCGA-56-8503	0.132075	0.114098	0.101927	0.100409	0.111888	0.102756	0.114951	0.0922084	0.0826591	0.132075
TCGA-56-8504	0.377814	0.443207	0.315279	0.33169	0.308405	0.341383	0.477357	0.319133	0.305283	0.368781
TCGA-56-8622	0.29174	0.347758	0.238443	0.212665	0.202078	0.220444	0.333101	0.217159	0.174622	0.318989
TCGA-56-8624	0.226962	0	0.200695	0.273062	0.176888	0.208206	0	0.333333	0.163766	0.265625
TCGA-56-8625	0.158935	0.224758	0.186774	0.178805	0.184892	0.176319	0.146898	0.162542	0.206181	0.175105
TCGA-56-8626	0.176539	0.159557	0.16129	0.194109	0.20878	0.19644	0.176626	0.197032	0.239969	0.290909
TCGA-56-8628	0.168737	0.172729	0.186604	0.191459	0.175188	0.184078	0.174236	0.207175	0.181732	0.147513
TCGA-56-8629	0.489053	0.360944	0.333969	0.390338	0.267257	0.396119	0.367027	0.311272	0.348961	0.419697
TCGA-56-A49D	0.319669	0.338663	0.291527	0.293102	0.296183	0.317676	0.320498	0.322377	0.32022	0.285603
TCGA-56-A4BW	0.189304	0.326896	0.242575	0.310835	0.171358	0.267028	0.210906	0.23829	0.153574	0.199974
TCGA-56-A4BX	0.680998	0.50139	0.483485	0.487622	0.714007	0.477497	0.629781	0.696204	0.547614	0.571702
TCGA-56-A4BY	0.413575	0.42288	0.346565	0.330487	0.399711	0.341709	0.507731	0.334915	0.352479	0.481481
TCGA-56-A4ZJ	0	0.0628571	0.11251	0.0644138	0.0909341	0.0600407	0	0.0575155	0.120761	0
TCGA-56-A4ZK	0.306057	0.287111	0.256666	0.231396	0.155287	0.350122	0.296617	0.29217	0.214579	0.328186
TCGA-56-A5DR	0.27437	0.31912	0.27812	0.297385	0.296326	0.300883	0.297961	0.264483	0.325892	0.228321
TCGA-56-A5DS	0.192396	0.174363	0.197641	0.206938	0.180978	0.191222	0.19184	0.178493	0.168851	0.142857
TCGA-56-A62T	0.327247	0.436775	0.317043	0.343488	0.433399	0.363805	0.310394	0.290894	0.492247	0
TCGA-57-1586	0	0	0.0666667	0.0666667	0.0666667	0.0666667	0	0	0.0666667	0
TCGA-57-1992	0.124281	0.115106	0.0934508	0.121453	0.112805	0.122239	0.269474	0.112976	0.156938	0.0662417
TCGA-57-1993	0.222109	0.24849	0.13744	0.164761	0.0631068	0.14863	0.295049	0.158988	0.159213	0.414222
TCGA-57-1994	0	0.0641026	0.175258	0.196071	0.145655	0.171694	0.175258	0.14026	0.105263	0
TCGA-58-8386	0.305281	0.218855	0.292001	0.321451	0.197191	0.287876	0.386364	0.344697	0.227806	0.270105
TCGA-58-8387	0.261819	0.203133	0.238697	0.230463	0.360125	0.252609	0.22042	0.300395	0.174173	0
TCGA-58-8388	0.376755	0.473571	0.359941	0.396972	0.328144	0.379802	0.546234	0.436302	0.285278	0.342297
TCGA-58-8390	0.474556	0.430025	0.514671	0.457968	0.523116	0.507943	0.434257	0.509783	0.512862	0.519231
TCGA-58-8391	0.425073	0.349063	0.377191	0.433925	0.250613	0.40674	0.508136	0.452094	0.329348	0.49097
TCGA-58-8392	0.483218	0.395171	0.370771	0.384937	0.247786	0.394856	0.466985	0.396443	0.209569	0.40817
TCGA-58-8393	0.25205	0.225648	0.223149	0.208964	0.230113	0.218827	0.215522	0.23438	0.23801	0.428571
TCGA-58-A46J	0.17437	0.230626	0.182068	0.180707	0.230757	0.174859	0.197203	0.186019	0.173491	0.272727
TCGA-58-A46K	0.363902	0.577807	0.217446	0.289784	0.207548	0.277506	0.556326	0.266099	0.217421	0.417946
TCGA-58-A46L	0.319111	0.437908	0.313789	0.334524	0.341824	0.315655	0.318255	0.337426	0.32018	0.298701
TCGA-58-A46M	0.544513	0.457756	0.435933	0.445831	0.440671	0.402151	0.445589	0.414969	0.466662	0.410467
TCGA-58-A46N	0.764327	0.844444	0.607829	0.505447	0.512099	0.505513	0.637864	0.484918	0.452771	0.844444
TCGA-59-2348	0.571429	0.571429	0.418527	0.349046	0.327452	0.338953	0.390756	0.33501	0.303451	0.423645
TCGA-59-2349	0.426488	0.434012	0.376967	0.413231	0.382027	0.397741	0.346994	0.400566	0.325433	0.523034
TCGA-59-2350	0.587963	0.322147	0.239085	0.323797	0	0.403524	0.709417	0.759259	0	0.560602
TCGA-59-2351	0.270642	0.209748	0.167016	0.217021	0.116126	0.198274	0	0.148344	0.115785	0.427235
TCGA-59-2352	0.794118	0.545995	0.794118	0.324498	0.188057	0.314267	0.436594	0.313337	0	0.794118
TCGA-59-2354	0.33842	0.387563	0.3552	0.346645	0.373145	0.291017	0.329417	0.329417	0.473563	0.434722
TCGA-59-2355	0.57732	0.287764	0.57732	0.371993	0	0.57732	0.57732	0.57732	0	0.57732
TCGA-59-2363	0.807362	0.546994	0.653372	0.713805	0.71875	0.822784	0.785511	0.813357	0.617617	0.741003
TCGA-59-2372	0.584601	0.42267	0.429355	0.484297	0.250074	0.450147	0.487205	0.703901	0.199287	0.611629
TCGA-59-A5PD	0.828571	0.344935	0.530441	0.36531	0.384327	0.392039	0.356138	0.465166	0.311341	0.670833
TCGA-5B-A90C	0.502342	0.615344	0.486508	0.430583	0	0.430583	0.534895	0.728571	0	0.857143
TCGA-5C-A9VG	0.201996	0.21758	0.196027	0.204818	0.180411	0.212615	0.245472	0.22222	0.213581	0.130682
TCGA-5C-A9VH	0.378519	0.412244	0.396251	0.396898	0.309599	0.384515	0.412244	0.400116	0.398053	0.339623
TCGA-5C-AAPD	0.28125	0.28125	0.296774	0.291049	0.488372	0.272597	0.278836	0.293725	0.399924	0.346405
TCGA-5G-A9ZZ	0	0	0.0689655	0	0	0	0	0	0.0909091	0
TCGA-5K-AAAP	0	0	0.117647	0	0.117647	0	0	0	0	0
TCGA-5L-AAT0	0.201574	0.212151	0.181823	0.213317	0.207285	0.204225	0.219719	0.215174	0.199822	0.135563
TCGA-5L-AAT1	0.174615	0.156178	0.158059	0.168158	0.171853	0.175426	0.16256	0.170072	0.165047	0.168569
TCGA-5M-AAT4	0.39739	0.410748	0.366562	0.384914	0.292169	0.376337	0.583748	0.455545	0.353868	0.452185
TCGA-5M-AAT6	0.145223	0.150836	0.148357	0.145201	0.140135	0.145716	0.141937	0.145328	0.136534	0.16409
TCGA-5M-AATE	0.518496	0.545348	0.434919	0.473568	0.369626	0.472895	0.591007	0.536091	0.454058	0.265404
TCGA-5N-A9KI	0.322756	0.440042	0.355363	0.383513	0.259033	0.38375	0.416826	0.369362	0.221685	0.714286
TCGA-5N-A9KM	0.337002	0.398696	0.411898	0.436812	0.355165	0.376818	0	0.370491	0.421453	0.331928
TCGA-5P-A9JU	0.390805	0	0.371639	0.599413	0.38771	0.408995	0	0.599413	0.240919	0.193053
TCGA-5P-A9JV	0.0851064	0.169248	0.19163	0.185857	0.285224	0.236588	0.0851064	0.0851064	0.270429	0.185714
TCGA-5P-A9JW	0	0.326961	0.279329	0.253935	0.295302	0.274503	0.297521	0.232143	0	0.303991
TCGA-5P-A9JY	0	0.238806	0.478628	0.391827	0.561533	0.452094	0	0.420621	0.578947	0.369608
TCGA-5P-A9JZ	0.422535	0	0.422535	0.431698	0.375	0.375	0	0	0.395522	0
TCGA-5P-A9K0	0	0.313253	0.455814	0.495025	0.314815	0.412861	0.283422	0.298854	0.333333	0
TCGA-5P-A9K2	0.385965	0.328125	0.385965	0.315789	0.334365	0.342355	0	0	0.352941	0
TCGA-5P-A9K3	0.529153	0.451213	0.501015	0.485725	0.285662	0.42858	0.529153	0.503422	0.496209	0.595041
TCGA-5P-A9K6	0.318584	0.318584	0.318584	0.318584	0.196057	0.196057	0.318584	0.318584	0.167742	0
TCGA-5P-A9K8	0	0	0	0	0	0	0	0	0	0
TCGA-5P-A9KA	0.217778	0.242101	0.237862	0.243413	0.29483	0.28189	0.42	0.27305	0.368421	0
TCGA-5P-A9KC	0.295455	0.271143	0.286153	0.281118	0.286616	0.304848	0.295455	0.289237	0.292464	0.313559
TCGA-5P-A9KE	0.293328	0.236581	0.272308	0.276268	0.309974	0.278792	0.277449	0.277449	0.284594	0
TCGA-5P-A9KH	0.15942	0	0.15942	0	0.102564	0.102564	0	0	0	0
TCGA-5R-AA1C	0.343622	0.416667	0.415332	0.425235	0.39737	0.439655	0.451439	0.536968	0.407728	0.307692
TCGA-5R-AA1D	0.171429	0	0.0416667	0.171429	0	0.171429	0.171429	0.142676	0	0
TCGA-5R-AAAM	0	0.219646	0.186822	0.220155	0	0.208186	0	0.170433	0.193078	0.15942
TCGA-5S-A9Q8	0.448526	0.526826	0.469484	0.450906	0.43543	0.46198	0.469364	0.460964	0.424545	0.508197
TCGA-5T-A9QA	0.226415	0.226415	0.296332	0.26279	0.3875	0.232959	0.226415	0.194289	0.3875	0
TCGA-5U-AB0D	0.221374	0.235294	0.253544	0.387861	0.478261	0.417994	0	0.387861	0.361579	0
TCGA-5U-AB0E	0.235294	0.28125	0.235294	0.217647	0.235294	0.217647	0.2	0.235294	0.235294	0
TCGA-5U-AB0F	0	0	0	0.183333	0.183333	0.183333	0.0857143	0	0	0
TCGA-5V-A9RR	0	0	0	0	0	0	0	0	0	0
TCGA-5X-AA5U	0.147059	0	0.201735	0.223379	0	0.201735	0.147059	0	0.147059	0
TCGA-60-2695	0.330313	0.364251	0.324462	0.348334	0.264524	0.319683	0.465208	0.369789	0.281342	0.558209
TCGA-60-2697	0	0	0	0.0487805	0	0.0487805	0	0	0	0
TCGA-60-2698	0.271614	0.215954	0.2276	0.232325	0.248425	0.22388	0.166764	0.216483	0.217394	0.146429
TCGA-60-2703	0.159715	0.14915	0.154857	0.167594	0.161059	0.179145	0.183285	0.207273	0.122368	0.166667
TCGA-60-2704	0.12248	0.200505	0.186085	0.15109	0.192387	0.180744	0	0.187257	0.224655	0.194261
TCGA-60-2706	0.810095	0.783951	0.737703	0.777415	0.599279	0.565544	0	0.238095	0.230769	0
TCGA-60-2707	0	0.27907	0.174108	0.200296	0	0.167455	0	0.241146	0.0876289	0.27907
TCGA-60-2708	0.133908	0.24797	0.294277	0.222089	0.293742	0.266248	0.095941	0.136846	0.231719	0
TCGA-60-2709	0.197802	0.15867	0.132545	0.154864	0.151012	0.162509	0.197802	0.181906	0.147436	0.145568
TCGA-60-2710	0.315527	0.261088	0.313456	0.30087	0.258916	0.329053	0.285549	0.262026	0.371871	0
TCGA-60-2711	0.303821	0.110558	0.287228	0.283185	0.285199	0.265321	0.207357	0.207357	0.25316	0.404255
TCGA-60-2712	0.210391	0.20915	0.210391	0.224058	0.187908	0.243247	0.20915	0.271597	0.20915	0
TCGA-60-2713	0.33125	0.38221	0.409593	0.376513	0.250957	0.366361	0.286064	0.334635	0.27173	0
TCGA-60-2714	0.290939	0.318031	0.312321	0.282344	0.258812	0.29418	0.313584	0.313608	0.24259	0.370554
TCGA-60-2715	0	0.0678733	0.1177	0.0882592	0.157895	0.0882592	0.161765	0	0.107326	0.0967659
TCGA-60-2716	0	0	0	0	0.360656	0	0	0	0.360656	0
TCGA-60-2719	0.487098	0.354796	0.321813	0.32796	0.367516	0.372835	0.358333	0.367055	0.328589	0.6
TCGA-60-2720	0.196364	0.144607	0.17067	0.159989	0.157561	0.148447	0.204659	0.182261	0.137765	0.20491
TCGA-60-2721	0.119333	0.173863	0.224471	0.194583	0.193051	0.227366	0.120732	0.188664	0.0643769	0.268657
TCGA-60-2722	0.536667	0.561479	0.566608	0.516294	0.469414	0.485793	0.343562	0.328473	0.377281	0.701065
TCGA-60-2723	0.306827	0.369233	0.35026	0.318436	0.310632	0.310571	0.400473	0.317597	0.307371	0.344023
TCGA-60-2724	0.230617	0.179041	0.216315	0.229425	0.216905	0.237109	0.179041	0.237971	0.207659	0.167813
TCGA-60-2725	0.122845	0.114025	0.125716	0.118912	0.169665	0.153751	0	0.126742	0.174331	0.0843373
TCGA-60-2726	0.287008	0.310095	0.244578	0.25525	0.24229	0.257315	0.213856	0.184785	0.298496	0.200858
TCGA-61-1722	0.298655	0.210781	0.21577	0.232892	0.156009	0.265375	0.423077	0.500765	0.15158	0.470649
TCGA-61-1725	0.642857	0.441577	0.338309	0.265168	0.258554	0.240557	0.323472	0.380252	0.282618	0.642857
TCGA-61-1727	0.453333	0.288448	0.241669	0.251622	0.182445	0.21612	0.244195	0.237195	0.137664	0.328817
TCGA-61-1728	0.358803	0.407569	0.321889	0.22414	0.0970165	0.21941	0.558937	0.254251	0.114754	0.594151
TCGA-61-1730	0.402215	0.445512	0.238772	0.252267	0.306059	0.263411	0.445512	0.260532	0.233644	0.453949
TCGA-61-1733	0.36219	0.324209	0.26673	0.242949	0	0.295006	0.825758	0.320673	0	0.565318
TCGA-61-1734	0.117647	0.170213	0.216605	0.153493	0.0549828	0.145133	0	0.170213	0.0863149	0
TCGA-61-1736	0.254028	0.361135	0.266016	0.300098	0.103773	0.294761	0.392927	0.358609	0.0919165	0.533981
TCGA-61-1737	0.270189	0.244535	0.181271	0.227251	0.142771	0.229273	0.198692	0.23372	0.129551	0.244799
TCGA-61-1738	0.647767	0.762107	0.762107	0.525111	0.633803	0.525111	0.762107	0.530188	0.633803	0.890411
TCGA-61-1740	0.25074	0.15433	0.236249	0.315247	0.335356	0.304311	0.205781	0.295932	0.28017	0.232584
TCGA-61-1741	0.538278	0.427635	0.420759	0.420759	0.181818	0.420759	0.431579	0.375272	0.181818	0.894737
TCGA-61-1895	0.182418	0.26087	0.173214	0.251829	0.0561305	0.260797	0.261009	0.226214	0.0663073	0
TCGA-61-1899	0.434691	0.63464	0.325916	0.455314	0.286321	0.38774	0.562421	0.776702	0.250666	0.900709
TCGA-61-1900	0.545163	0.124505	0.470675	0.398616	0.489362	0.283086	0.383333	0.207839	0.640907	0.120805
TCGA-61-1901	0.427275	0.0660958	0.364653	0.275979	0.492722	0.348578	0.371429	0.371429	0.595053	0
TCGA-61-1903	0.46395	0.51031	0.655172	0.403493	0	0.407923	0.655172	0.532025	0	0.72369
TCGA-61-1904	0.343182	0.465767	0.199785	0.251492	0.116043	0.245445	0.427765	0.34889	0.136687	0.510357
TCGA-61-1906	0.299563	0.357941	0.278444	0.223566	0.132787	0.219977	0.291484	0.223877	0.2	0.603774
TCGA-61-1907	0.435958	0.466532	0.265531	0.280043	0.168576	0.299826	0.376471	0.361023	0.174261	0.301075
TCGA-61-1910	0.697357	0	0.649048	0.503054	0.420561	0.64443	0.521739	0.439441	0.43477	0
TCGA-61-1911	0.540447	0.704082	0.40651	0.357888	0.285714	0.32098	0.704082	0.356934	0.361702	0.704082
TCGA-61-1913	0.673603	0.652762	0.74073	0.480151	0.612989	0.68174	0.652762	0.532498	0.612989	0.903226
TCGA-61-1914	0.233243	0.224766	0.257185	0.256392	0.248295	0.199021	0.343732	0.338445	0.225772	0.320608
TCGA-61-1915	0.434675	0.292395	0.265842	0.262367	0.31612	0.32268	0.54951	0.262248	0.203799	0.365482
TCGA-61-1919	0.216206	0.183006	0.202186	0.194606	0.0885049	0.196905	0.21382	0.187915	0.10113	0.199987
TCGA-61-1995	0.274035	0.335167	0.201952	0.187773	0.0863179	0.195235	0.329192	0.394996	0.0539003	0.616279
TCGA-61-1998	0.307361	0.175505	0.156374	0.207276	0.258176	0.260746	0.219553	0.187806	0.181597	0.264977
TCGA-61-2000	0.411559	0.269531	0.244481	0.262767	0.648148	0.260151	0.395184	0.236101	0.395869	0.353238
TCGA-61-2002	0.370927	0.423077	0.313943	0.259432	0.333333	0.259432	0.322494	0.359923	0	0.423077
TCGA-61-2003	0.219135	0.142262	0.165462	0.141971	0.157177	0.149657	0.0979118	0.134071	0.145071	0.129938
TCGA-61-2008	0.186243	0.10582	0.19364	0.196588	0.192341	0.189598	0.315789	0.219178	0.156044	0.259165
TCGA-61-2009	0.261558	0.220495	0.196685	0.247376	0.219079	0.262739	0.300616	0.247938	0.227325	0.300695
TCGA-61-2012	0.176465	0.1314	0.160508	0.175077	0.197148	0.182124	0.143285	0.282423	0.166924	0.0963231
TCGA-61-2016	0.480697	0.56684	0.480697	0.410365	0.375457	0.409808	0.409808	0.56684	0.375457	0.691176
TCGA-61-2018	0.338726	0.22426	0.218425	0.202643	0.132349	0.249634	0.478205	0.262644	0.156863	0.472253
TCGA-61-2087	0.947917	0.676656	0.502457	0.58899	0.415385	0.502457	0.947917	0.681651	0.234478	0.657181
TCGA-61-2088	0.5	0	0.5	0.427702	0	0.457133	0	0	0	0
TCGA-61-2092	0.429061	0.655927	0.435296	0.435585	0.268474	0.257482	0.655927	0.494493	0.248824	0.435831
TCGA-61-2094	0.219976	0.276316	0.15792	0.162518	0.162988	0.162335	0.121308	0.173998	0.0816327	0.276316
TCGA-61-2095	0.17051	0.171852	0.170091	0.153033	0.160976	0.127632	0.17886	0.147746	0.166196	0.197875
TCGA-61-2096	0.34321	0.455231	0.467154	0.393622	0.320462	0.404488	0.574322	0.62277	0.353714	0.804878
TCGA-61-2101	0.245614	0.056338	0.056338	0.19332	0.075	0.141232	0	0	0	0.056338
TCGA-61-2102	1	1	0.713118	0.553306	0.545455	0.697234	0.810937	0.75	0.153846	1
TCGA-61-2104	0.661765	0.661765	0.376734	0.46902	0	0.46902	0.661765	0.661765	0	0.661765
TCGA-61-2109	0.205882	0.474359	0.328114	0.19868	0.4265	0.213428	0.41365	0.352941	0.4265	0
TCGA-61-2110	0.183403	0.197061	0.154714	0.149113	0.132289	0.181844	0.174262	0.19046	0.163539	0.160261
TCGA-61-2111	0.178165	0.174171	0.154678	0.156305	0.114082	0.199858	0.216468	0.153492	0.128781	0.242781
TCGA-61-2113	0.151248	0.147349	0.149039	0.15603	0.144355	0.16146	0.180092	0.187536	0.149883	0.169149
TCGA-61-2612	0.527705	0.392469	0.406349	0.325595	0.163636	0.289424	0.621302	0.352318	0	0.621302
TCGA-61-2613	0.531557	0.461508	0.533233	0.384626	0	0.435672	0.819095	0.409051	0.246835	0.819095
TCGA-61-2614	0.431482	0.368544	0.448686	0.30968	0.266667	0.30968	0.431482	0.431482	0.266667	0.630705
TCGA-62-8394	0.23858	0.249454	0.14707	0.181515	0.163829	0.229514	0.0774091	0.331157	0.179617	0.0864198
TCGA-62-8395	0.263013	0.0909091	0.0720339	0.176304	0.237361	0.215308	0	0.208333	0.221814	0
TCGA-62-8397	0.291794	0	0.291794	0.291794	0	0.153285	0	0.153285	0.324527	0
TCGA-62-8398	0.526316	0.381579	0.335658	0.378936	0.381579	0.399825	0.526316	0.30865	0.526316	0.236842
TCGA-62-8399	0.331091	0.347514	0.301338	0.28006	0.310309	0.29151	0.312613	0.290816	0.286204	0.35645
TCGA-62-8402	0.383007	0.380825	0.35895	0.313117	0.148325	0.324336	0.766667	0.444118	0	0.766667
TCGA-62-A46O	0.562862	0.523464	0.467085	0.492888	0.530136	0.488367	0.600957	0.502686	0.501732	0.41927
TCGA-62-A46P	0.419498	0.392308	0.402817	0.393754	0.396994	0.380942	0.516129	0.446551	0.342282	0.366906
TCGA-62-A46R	0.343923	0.322209	0.300332	0.2666	0.371241	0.233664	0.371817	0.264891	0.316909	0.235364
TCGA-62-A46S	0.210526	0.329028	0.364479	0.400697	0.206897	0.290949	0.224311	0.208438	0.253033	0.152397
TCGA-62-A46U	0.213333	0.213333	0.213333	0.161014	0	0.145042	0.213333	0.213333	0	0.123399
TCGA-62-A46V	0.170213	0.170213	0.231844	0.216059	0.170213	0.170213	0.381443	0.282051	0.170213	0
TCGA-62-A46Y	0.413333	0.270241	0.295195	0.309864	0.250195	0.251651	0.413333	0.295195	0.323077	0.346202
TCGA-62-A470	0.304643	0.306865	0.373793	0.355161	0.381138	0.342299	0.278236	0.290012	0.336089	0
TCGA-62-A471	0.38819	0.342433	0.325392	0.286251	0.287821	0.318657	0.452055	0.398691	0.246154	0.298755
TCGA-62-A472	0.449275	0.449275	0.390951	0.30627	0.355713	0.305096	0	0	0.349638	0
TCGA-63-5128	0.575382	0.374057	0.527238	0.480257	0.515902	0.492424	0.467156	0.520017	0.473191	0.483481
TCGA-63-5131	0.545947	0.449927	0.391309	0.362059	0.284352	0.34617	0.384847	0.36365	0.364279	0.339907
TCGA-63-6202	0.285256	0.284101	0.261098	0.306691	0.229353	0.311642	0.346725	0.32363	0.245203	0.304899
TCGA-63-7020	0.472222	0.277778	0.317651	0.337934	0.407534	0.332095	0.217014	0.362686	0.361242	0.277778
TCGA-63-7021	0.154176	0.15568	0.147042	0.160465	0.149551	0.14995	0.154224	0.136788	0.176569	0.154951
TCGA-63-7022	0.104771	0.111418	0.124653	0.1102	0.117035	0.100658	0.0928942	0.11888	0.126593	0.15426
TCGA-63-7023	0.236101	0.437258	0.337544	0.285592	0.59486	0.542371	0	0.29263	0.354371	0.173333
TCGA-63-A5M9	0.628571	0.554123	0.458093	0.452973	0.400792	0.435778	0.554123	0.628571	0.400792	0.455311
TCGA-63-A5MB	0.317238	0.308787	0.381685	0.452545	0.405313	0.438472	0.40509	0.442983	0.383351	0.493315
TCGA-63-A5MG	0	0.121951	0.179199	0.159753	0.0934579	0.202635	0	0.172905	0	0.121951
TCGA-63-A5MH	0.374488	0.648355	0.547114	0.557992	0.605299	0.585922	0.550229	0.607663	0.502154	0.655849
TCGA-63-A5MI	0.170972	0.298359	0.236662	0.275118	0.131833	0.314632	0.275813	0.384707	0.212847	0.233961
TCGA-63-A5MJ	0.0989356	0.25	0.260818	0.216601	0.160407	0.223442	0	0.372658	0.254408	0.145831
TCGA-63-A5ML	0.446382	0.574123	0.413307	0.386537	0.51114	0.450352	0.488307	0.388301	0.256643	0.328999
TCGA-63-A5MM	0.169128	0.189274	0.17259	0.169941	0.195943	0.179504	0.179485	0.169376	0.192214	0.178268
TCGA-63-A5MN	0	0	0.104292	0.142857	0	0.107143	0	0	0	0
TCGA-63-A5MP	0.275166	0.247827	0.225355	0.197989	0.222093	0.263764	0.406323	0.406323	0.238788	0.387597
TCGA-63-A5MR	0.263347	0.250947	0.281149	0.268506	0.253593	0.265387	0.110288	0.304071	0.256781	0.492537
TCGA-63-A5MS	0.115819	0.0993535	0.143785	0.120429	0.143423	0.131194	0.110979	0.134704	0.160863	0.06782
TCGA-63-A5MT	0.145643	0.158073	0.186876	0.198312	0.131344	0.18732	0.187182	0.135941	0.127379	0.216256
TCGA-63-A5MU	0.577244	0.459675	0.576974	0.516146	0.54416	0.578482	0.701724	0.70205	0.587523	0.52069
TCGA-63-A5MV	0.291026	0.182292	0.149181	0.278056	0.206897	0.257739	0.233766	0.209405	0	0.180952
TCGA-63-A5MW	0.254165	0.373988	0.281387	0.328229	0.298703	0.287301	0.302802	0.34809	0.25943	0.27224
TCGA-63-A5MY	0.39142	0.396201	0.32582	0.392349	0.277554	0.350953	0.395305	0.343134	0.373333	0
TCGA-64-1676	0.244567	0.22049	0.239395	0.241657	0.245142	0.249157	0.235413	0.21902	0.261046	0.235193
TCGA-64-1677	0.29225	0.284712	0.240576	0.222334	0.253207	0.229832	0.239033	0.267067	0.263316	0.226131
TCGA-64-1679	0.169605	0.172699	0.187585	0.191525	0.185346	0.198816	0.129229	0.184028	0.143762	0.195926
TCGA-64-1680	0.0437158	0	0.0642822	0.071671	0.109296	0.0760305	0	0.0864486	0.0664124	0
TCGA-64-1681	0.281368	0.242672	0.242672	0.202969	0.131385	0.198509	0.263137	0.242652	0.122175	0.307972
TCGA-64-5774	0.347223	0.444741	0.450103	0.38452	0.526504	0.369402	0.329582	0.404937	0.479905	0.459338
TCGA-64-5775	0.48176	0.43964	0.436201	0.460545	0.428921	0.465835	0.431648	0.477574	0.524275	0.44646
TCGA-64-5778	0.290461	0.308341	0.279767	0.322137	0.302234	0.31152	0.271232	0.309711	0.29676	0.322802
TCGA-64-5779	0.291901	0.299445	0.328982	0.266992	0.24244	0.27386	0.162085	0.256917	0.2629	0.396774
TCGA-64-5781	0.216069	0.239505	0.218817	0.216598	0.213905	0.207884	0.179697	0.2203	0.215589	0.137817
TCGA-64-5815	0.186469	0.150806	0.187361	0.203259	0.151339	0.20045	0.192361	0.214708	0.181942	0.117647
TCGA-66-2727	0.385992	0.480152	0.333348	0.32984	0.342193	0.31434	0.459847	0.420362	0.185599	0.525995
TCGA-66-2734	0.189606	0.223522	0.19113	0.184841	0.1772	0.178268	0.178649	0.182553	0.1748	0.311111
TCGA-66-2742	0.342174	0.371608	0.339571	0.361607	0.193127	0.319504	0.451852	0.391351	0.287702	0.5
TCGA-66-2744	0.255235	0.362475	0.244055	0.260207	0.396434	0.274538	0.173787	0.214795	0.307207	0.268851
TCGA-66-2754	0.514979	0.428966	0.386885	0.461184	0.41051	0.427913	0.483529	0.633443	0.353701	0.563862
TCGA-66-2755	0.309256	0.207757	0.27115	0.237862	0.265008	0.238598	0.109997	0.193206	0.315291	0
TCGA-66-2756	0.499064	0.486076	0.404217	0.429808	0.437141	0.446379	0.443085	0.446917	0.469194	0.331969
TCGA-66-2757	0.499348	0.406091	0.433362	0.473314	0.429572	0.457707	0.645813	0.564274	0.383979	0.515303
TCGA-66-2758	0.389924	0.257433	0.27092	0.316753	0.377039	0.285662	0.310656	0.320521	0.398529	0.534984
TCGA-66-2759	0.308487	0.276558	0.300736	0.333304	0.303134	0.332994	0.356623	0.304233	0.248575	0.36632
TCGA-66-2763	0.295718	0.384515	0.33662	0.31609	0.338023	0.300031	0.386591	0.362277	0.306604	0.373967
TCGA-66-2765	0.300752	0.286279	0.344673	0.387017	0.188967	0.358183	0.466216	0.485254	0.216745	0.466216
TCGA-66-2766	0.600611	0.478845	0.537259	0.451287	0.460279	0.488164	0.410316	0.536291	0.474487	0.7657
TCGA-66-2767	0.166547	0.246566	0.173156	0.223047	0.161861	0.188732	0.234844	0.213871	0.169143	0.173474
TCGA-66-2768	0.330418	0.289752	0.312412	0.316476	0.224912	0.329152	0.262529	0.292453	0.220578	0.348378
TCGA-66-2769	0.119057	0.155028	0.145686	0.155036	0.175734	0.146554	0.0839506	0.190603	0.168834	0.137933
TCGA-66-2770	0	0.319179	0.321443	0.280613	0.256508	0.283192	0	0.2125	0.26067	0.210526
TCGA-66-2771	0.286136	0.214453	0.253501	0.241686	0.243808	0.249982	0.266915	0.281106	0.250951	0.0846154
TCGA-66-2773	0.148659	0.106111	0.130817	0.150528	0.135476	0.150561	0.120406	0.139928	0.174689	0.142839
TCGA-66-2777	0.262608	0.24731	0.207666	0.242456	0.17765	0.239395	0.15364	0.2025	0.22396	0.28
TCGA-66-2778	0.203125	0.229222	0.180707	0.183683	0.195147	0.188087	0.229222	0.202128	0.224195	0.132075
TCGA-66-2780	0.218101	0.194415	0.194765	0.162814	0.26087	0.176514	0.209201	0.179194	0.177273	0.146667
TCGA-66-2781	0	0.269697	0.319379	0.265942	0.291085	0.250511	0	0	0.314815	0
TCGA-66-2782	0.233036	0.281112	0.235868	0.229513	0.246341	0.227736	0.274129	0.244381	0.196259	0.278743
TCGA-66-2783	0.242997	0.282783	0.311867	0.271366	0.296534	0.268292	0.224719	0.273763	0.285348	0.378947
TCGA-66-2785	0.162191	0.18866	0.168326	0.179186	0.168637	0.177121	0.186076	0.189149	0.189895	0.199306
TCGA-66-2786	0.265699	0.288292	0.227496	0.212718	0.294918	0.22464	0.238631	0.1848	0.258298	0.352921
TCGA-66-2787	0.309651	0.271024	0.333608	0.330176	0.318221	0.324678	0.337595	0.314122	0.298575	0.357143
TCGA-66-2788	0.230075	0.239294	0.22203	0.203992	0.26307	0.229623	0.227273	0.203269	0.209716	0.208609
TCGA-66-2789	0.33856	0.31085	0.347311	0.319728	0.245499	0.289475	0.35521	0.384442	0.238282	0.307903
TCGA-66-2791	0.278127	0.214155	0.244584	0.24677	0.256618	0.265476	0.311293	0.273205	0.268673	0.25
TCGA-66-2792	0.326586	0	0.508775	0.403647	0.400717	0.396613	0.184466	0.421514	0.474826	0.6
TCGA-66-2793	0.507917	0.459102	0.423781	0.482767	0.372874	0.458153	0.440119	0.487539	0.397346	0.491667
TCGA-66-2794	0.294057	0.443214	0.340556	0.302756	0.255854	0.294134	0.433901	0.349366	0.312268	0.635417
TCGA-66-2795	0.316877	0.278362	0.342919	0.297193	0.303652	0.315052	0.304505	0.274826	0.359411	0.322581
TCGA-66-2800	0.353956	0.332573	0.423142	0.387837	0.334799	0.399538	0.326209	0.364984	0.262816	0.367722
TCGA-67-3770	0.313716	0.333514	0.318108	0.380203	0.344056	0.342343	0.361421	0.383626	0.348178	0.430894
TCGA-67-3771	0.281396	0.268417	0.264048	0.258517	0.258818	0.279692	0.304944	0.27756	0.254119	0.428003
TCGA-67-3772	0.269702	0.269702	0.269702	0.270008	0.0591716	0.221737	0	0.269702	0.0591716	0
TCGA-67-3773	0.191695	0.428657	0.226812	0.281822	0.250526	0.276016	0.302122	0.289974	0.266842	0.25
TCGA-67-3774	0.269991	0.262664	0.220696	0.226678	0.254192	0.215989	0.262664	0.238584	0.243637	0.249107
TCGA-67-4679	0.285456	0.233282	0.272738	0.287368	0.239943	0.289802	0.265331	0.250817	0.257516	0.218393
TCGA-67-6215	0.21388	0.227273	0.239246	0.206902	0.252163	0.198057	0	0.258028	0.263681	0.272727
TCGA-67-6216	0	0.0833333	0.0833333	0.0833333	0	0.0833333	0.0833333	0.0833333	0	0
TCGA-67-6217	0.249325	0.149295	0.284854	0.299825	0.273954	0.319133	0	0.392101	0.282749	0.158386
TCGA-68-7755	0.47405	0.455279	0.419271	0.471631	0.524798	0.442402	0.507757	0.472291	0.523373	0.385714
TCGA-68-7756	0.199318	0	0.198465	0.163161	0.226802	0.1992	0.149775	0.220552	0.163384	0.255319
TCGA-68-7757	0.185668	0.16815	0.169206	0.170622	0.143064	0.17324	0.185649	0.187554	0.170656	0.249102
TCGA-68-8250	0.34489	0.373897	0.293686	0.318885	0.260007	0.299017	0.272646	0.315321	0.289185	0.453743
TCGA-68-8251	0.180519	0.301761	0.22338	0.22993	0.214001	0.201592	0.31364	0.212105	0.25699	0.272639
TCGA-68-A59J	0.346148	0.377351	0.320584	0.312454	0.280868	0.316048	0.448247	0.334291	0.358012	0.467497
TCGA-69-7760	0.5	0.344609	0.308036	0.5	0.203738	0.381868	0.5	0.5	0.263736	0.5
TCGA-69-7761	0.211268	0	0.163967	0.116667	0	0.116667	0.116667	0.142749	0	0
TCGA-69-7763	0.263402	0.608974	0.263402	0.321946	0.142836	0.278944	1	0.136576	0.142836	0
TCGA-69-7764	0	0	0.180927	0.388276	0.556436	0.47493	0	0.321233	0	0
TCGA-69-7765	0.172782	0.167435	0.194648	0.196771	0.189549	0.189356	0.196606	0.191944	0.205613	0.265534
TCGA-69-7973	0.288033	0.266797	0.320425	0.30126	0.282406	0.297469	0.262076	0.325511	0.297747	0.47619
TCGA-69-7974	0.226806	0.304455	0.237547	0.2258	0.205867	0.196063	0.219057	0.211129	0.240076	0.330317
TCGA-69-7978	0.128579	0.141045	0.125962	0.140903	0.133033	0.142203	0.129108	0.130344	0.123586	0.119726
TCGA-69-7979	0.3106	0.293423	0.309454	0.30598	0.316188	0.317884	0.315616	0.326818	0.303737	0.243773
TCGA-69-7980	0.274317	0.263802	0.275002	0.290568	0.259896	0.264938	0.313644	0.31821	0.242727	0.213538
TCGA-69-8253	0.313144	0.251977	0.250756	0.257923	0.281006	0.283866	0.34431	0.264608	0.299621	0.159905
TCGA-69-8254	0.171178	0.166188	0.166188	0.211489	0.168982	0.194251	0.137931	0.207161	0.179484	0
TCGA-69-8255	0.295652	0.266008	0.268606	0.390236	0.329219	0.352144	0	0.279942	0.274614	0.305989
TCGA-69-A59K	0.22507	0.260882	0.259134	0.232042	0.220666	0.247639	0.23557	0.265017	0.222092	0.138211
TCGA-6A-AB49	0.35516	0.410875	0.417441	0.445727	0.521028	0.497292	0.423916	0.414722	0.55002	0.408471
TCGA-6D-AA2E	0	0	0.0507246	0.148795	0.157895	0.186902	0	0	0	0
TCGA-70-6722	0.219757	0.270867	0.194342	0.190984	0.207313	0.212418	0.27023	0.214776	0.27249	0.21921
TCGA-70-6723	0.90099	0.718011	0.64162	0.615763	0.809355	0.575421	0.654962	0.650927	0.888236	0.45054
TCGA-71-6725	0.336449	0.333333	0.312368	0.209961	0.288288	0.154467	0.0867209	0.288288	0.288288	0
TCGA-71-8520	0.456105	0.490494	0.336622	0.296878	0.274306	0.284725	0.236832	0.338318	0.4375	0.097561
TCGA-73-4658	0.108997	0.128949	0.106982	0.134167	0.110788	0.126677	0.114059	0.127705	0.118045	0.114636
TCGA-73-4659	0.211633	0.194251	0.187239	0.23538	0.12079	0.221621	0.219594	0.202742	0.100399	0.136364
TCGA-73-4662	0.423657	0.373117	0.343207	0.392414	0.286136	0.402094	0.376187	0.417086	0.305587	0.468085
TCGA-73-4666	0.244096	0.213679	0.244989	0.269057	0.251993	0.276008	0.278298	0.252315	0.217831	0.144898
TCGA-73-4668	0.288095	0.318363	0.268985	0.252515	0.317325	0.269267	0.270057	0.248554	0.325357	0.316231
TCGA-73-4670	0.466373	0.423141	0.376307	0.349157	0.357914	0.365187	0.518696	0.573923	0.377788	0.432654
TCGA-73-4675	0.348322	0.473373	0.417504	0.358581	0.366059	0.360199	0.16568	0.318281	0.385965	0
TCGA-73-4676	0.521605	0.525264	0.472242	0.482753	0.330491	0.428566	0.525264	0.496824	0.416015	0.627451
TCGA-73-4677	0.245751	0.212949	0.249242	0.232806	0.279264	0.268506	0.273837	0.25991	0.251995	0.313218
TCGA-73-7498	0.143968	0.224675	0.29601	0.280224	0.303762	0.217973	0.204719	0.191489	0.303762	0
TCGA-73-7499	0.306751	0.292236	0.297558	0.293282	0.301494	0.337084	0.350106	0.275349	0.379298	0.382353
TCGA-73-A9RS	0.273937	0.343731	0.324862	0.331006	0.304979	0.33963	0.237817	0.296072	0.284874	0.245625
TCGA-74-6573	0.803571	0.803571	0.486691	0.584139	0.169811	0.803571	0.803571	0.803571	0.417339	0.582341
TCGA-74-6575	0.23955	0.356654	0.28885	0.200775	0.282672	0.240184	0.205882	0.15649	0.252401	0.371429
TCGA-74-6577	0.25641	0.25641	0.25641	0.262134	0.25641	0.29777	0.25641	0.262134	0.25641	0.253968
TCGA-74-6578	0.23913	0.330858	0.236178	0.205009	0.284118	0.204074	0.23913	0.208851	0.23913	0.383178
TCGA-74-6581	0	0	0.442623	0.403499	0	0.434077	0	0.442623	0	0
TCGA-74-6584	0	0	0.264018	0.289966	0.212121	0.289966	0	0	0	0
TCGA-75-5122	0.312022	0.155998	0.28366	0.263316	0.112373	0.228353	0.484369	0.310328	0.282912	0.0983694
TCGA-75-5125	0.218043	0.186318	0.172124	0.168258	0.237863	0.171633	0.283476	0.222413	0.230786	0.321364
TCGA-75-5126	0.146118	0.150047	0.14628	0.145406	0.14738	0.1539	0.129439	0.143045	0.146153	0.133294
TCGA-75-5146	0.319914	0.407277	0.323593	0.322794	0.370291	0.345779	0.370895	0.322166	0.373014	0.280255
TCGA-75-5147	0.203767	0.326923	0.225651	0.267409	0.124378	0.231992	0.326923	0.225651	0.15975	0.326923
TCGA-75-6203	0	0	0	0	0	0	0	0	0	0
TCGA-75-6205	0.124786	0.136364	0.108348	0.101514	0	0.124786	0	0.105048	0	0
TCGA-75-6206	0.454545	0.454545	0.395628	0.340909	0.359926	0.50821	0.454545	0.454545	0.454545	0.555556
TCGA-75-6207	0.307998	0.629653	0.474563	0.307998	0	0.307998	0.307998	0.307998	0.0431034	0.451613
TCGA-75-6211	0.205736	0.303987	0.191151	0.221085	0.246787	0.230212	0.218574	0.240521	0.273932	0.167184
TCGA-75-6212	0	0	0	0.174242	0.111111	0.142677	0.174242	0.174242	0.217391	0
TCGA-75-6214	0.373849	0.382839	0.380493	0.33589	0.374955	0.344516	0.341438	0.357714	0.450417	0.539057
TCGA-75-7025	0.138614	0	0.234013	0.191816	0.213846	0.185522	0.155556	0.249121	0.249414	0
TCGA-75-7027	0.494235	0.331363	0.43237	0.506624	0.444058	0.425375	0.569229	0.427607	0.424232	0.285861
TCGA-75-7030	0.131579	0.131579	0.131579	0.131579	0.131579	0.131579	0.131579	0.131579	0.102952	0
TCGA-75-7031	0.299764	0.324763	0.291486	0.324531	0.350209	0.346727	0.202019	0.27617	0.27172	0.166667
TCGA-76-4925	0.689655	0.476215	0.513502	0.48769	0.337349	0.689655	0.689655	0.689655	0	0.589393
TCGA-76-4926	0.0357724	0.0357724	0.250981	0.229096	0.383838	0.230706	0	0.0357724	0	0
TCGA-76-4928	0.170528	0.169314	0.164298	0.170928	0.183444	0.177963	0.174595	0.174595	0.177003	0.154111
TCGA-76-4929	0.48472	0.415878	0.48472	0.48472	0.346617	0.415669	0.48472	0.48472	0.287671	0.48472
TCGA-76-4931	0.949517	0.863999	0.863999	0.863999	0.349509	0.599195	0	0.863999	0.252595	0.567812
TCGA-76-4932	0.368794	0	0.289048	0.345241	0	0.268336	0	0	0.368794	0
TCGA-76-4934	0.584091	0.617551	0.445749	0.477656	0.386364	0.456919	0.781818	0.783217	0	0.783217
TCGA-76-4935	0	0	0.106271	0.278508	0	0.254859	0.42	0	0	0
TCGA-76-6191	0.351707	0.504404	0.472588	0.456512	0.389903	0.429796	0	0.481532	0.473684	0.604762
TCGA-76-6192	0	0.4	0.393069	0.336953	0.386139	0.336953	0.224719	0.4	0.299065	0.303865
TCGA-76-6193	0.229388	0.221529	0.196422	0.208959	0.197739	0.215599	0.236313	0.244096	0.211268	0.244661
TCGA-76-6280	0.378494	0	0.328716	0.248538	0.260082	0.257036	0.267857	0.384615	0.216843	0.477273
TCGA-76-6282	0.41776	0.537824	0.340305	0.337239	0.272762	0.309875	0	0.352227	0.358025	0
TCGA-76-6283	0.500629	0.467866	0.461025	0.406794	0	0.867925	0.867925	0.867925	0.857143	0.867925
TCGA-76-6285	0.451334	0.733333	0.381971	0.32961	0.500639	0.396412	0	0	0.709091	0
TCGA-76-6286	0.504682	0.416545	0.418731	0.503727	0.340354	0.473807	0.416545	0.405964	0.695882	0.389818
TCGA-76-6656	0.311975	0.31735	0.32958	0.341362	0.388965	0.356969	0.34472	0.311975	0.34472	0.421196
TCGA-76-6657	0.378151	0.373626	0.366468	0.406742	0.282609	0.388818	0	0.356654	0.337031	0.42069
TCGA-76-6660	0.484961	0.665591	0.452965	0.466338	0.144444	0.398107	0.564516	0.665591	0	0.665591
TCGA-76-6661	0.348485	0	0.302222	0.336998	0.313077	0.355997	0.314242	0.355997	0.302222	0.253165
TCGA-76-6662	0.313076	0.331794	0.311346	0.331794	0.257353	0.311346	0.313076	0.331794	0.258333	0.280153
TCGA-76-6663	0.111111	0.111111	0.170399	0.201506	0.461538	0.232966	0.10101	0.148148	0.382703	0.148148
TCGA-76-6664	0.346667	0.394487	0.394487	0.360337	0.382716	0.368752	0.346667	0.394487	0.0803571	0.394487
TCGA-77-6842	0.363234	0.30199	0.305338	0.310367	0.246812	0.298121	0.393651	0.310157	0.225306	0.292741
TCGA-77-6843	0.395518	0.457831	0.295938	0.263975	0.238908	0.313263	0.314893	0.371547	0.348242	0.45223
TCGA-77-6844	0.321699	0.363006	0.301326	0.326203	0.317832	0.341037	0.312626	0.347186	0.317832	0.596217
TCGA-77-6845	0.519553	0.45747	0.5356	0.510132	0.383066	0.498648	0.457402	0.47487	0.374045	0.521797
TCGA-77-7138	0	0	0	0.14	0.108108	0.124054	0	0.190476	0	0
TCGA-77-7139	0.369112	0.275593	0.430602	0.472913	0.311302	0.410377	0.48491	0.48022	0.267004	0.501507
TCGA-77-7140	0.498558	0.37664	0.417378	0.534552	0.441632	0.444262	0.49292	0.492572	0.543644	0.530639
TCGA-77-7141	0.183627	0.277988	0.23365	0.243737	0.31022	0.269273	0.168804	0.289664	0.192998	0.231638
TCGA-77-7142	0.282952	0.315476	0.241069	0.290574	0.213207	0.31889	0.39463	0.331921	0.236454	0.362443
TCGA-77-7335	0.219764	0.201582	0.185076	0.201628	0.154492	0.199797	0.251836	0.239397	0.183194	0.2317
TCGA-77-7337	0.265137	0.233121	0.269396	0.285032	0.342749	0.273748	0.323124	0.301497	0.30496	0.389639
TCGA-77-7338	0.200932	0.202517	0.303614	0.272296	0.254109	0.232821	0.219019	0.336777	0.252991	0.279192
TCGA-77-7463	0.395498	0.325821	0.335501	0.304483	0.417694	0.27834	0.399567	0.324081	0.353534	0.464539
TCGA-77-7465	0.511676	0.483862	0.475443	0.451613	0.433593	0.449283	0.53241	0.469804	0.456533	0.443313
TCGA-77-8007	0.208149	0.279306	0.248162	0.181556	0.11031	0.181556	0.191258	0.175123	0.0798071	0.295455
TCGA-77-8008	0.138107	0.185368	0.145096	0.123474	0.0970355	0.152661	0.160176	0.130366	0.18402	0.287671
TCGA-77-8009	0.539577	0.495056	0.46109	0.363304	0.272313	0.269836	0.321912	0.470683	0.432985	0.261538
TCGA-77-8128	0.54031	0.64279	0.379219	0.401856	0.470539	0.436097	0	0.530209	0.37165	0.333906
TCGA-77-8130	0.228129	0.197741	0.222076	0.221828	0.327989	0.267846	0.398723	0.222064	0.0733762	0.382812
TCGA-77-8131	0.196361	0.137121	0.167905	0.181203	0.16091	0.153789	0.153789	0.181604	0.187254	0.169492
TCGA-77-8133	0.315652	0.232434	0.216209	0.274514	0.283571	0.292123	0.290734	0.237015	0.246736	0.333333
TCGA-77-8136	0.16544	0.170866	0.155256	0.150918	0.198524	0.175262	0.143871	0.150003	0.149043	0.16588
TCGA-77-8138	0.146889	0.125144	0.161363	0.186097	0.151881	0.195894	0.162499	0.201232	0.0846069	0.193182
TCGA-77-8139	0.211421	0.16775	0.221871	0.243376	0.208774	0.226474	0.182519	0.2739	0.20006	0.232558
TCGA-77-8140	0.204416	0.296174	0.236786	0.219736	0.217027	0.236067	0.225005	0.188492	0.186147	0.277252
TCGA-77-8143	0.543881	0.366876	0.470071	0.407475	0.538637	0.441611	0.305556	0.547915	0.448197	0.479211
TCGA-77-8144	0.326747	0.351581	0.351873	0.389056	0.384214	0.383651	0.369787	0.389095	0.385546	0.385599
TCGA-77-8145	0.411607	0.417431	0.288525	0.315231	0.331634	0.294724	0.375392	0.407424	0.321485	0
TCGA-77-8148	0.421181	0.287357	0.409818	0.405316	0.419135	0.423337	0.323899	0.4744	0.293571	0.250306
TCGA-77-8150	0.518735	0.400205	0.395693	0.42477	0.264751	0.394871	0.518735	0.389084	0.341528	0.765625
TCGA-77-8153	0.180331	0.312432	0.293479	0.259111	0.356856	0.320617	0.13844	0.214014	0.335716	0.149643
TCGA-77-8154	0.344275	0.383717	0.410534	0.417502	0.400376	0.405575	0.384557	0.302642	0.337325	0.545455
TCGA-77-8156	0.191255	0.224552	0.202042	0.143635	0.149903	0.154137	0.153847	0.175038	0.151685	0.169342
TCGA-77-A5G1	0.147189	0.129032	0.163137	0.140186	0.142856	0.146298	0.129032	0.146065	0.15546	0.115364
TCGA-77-A5G3	0.226856	0.170059	0.220399	0.224517	0.192383	0.229688	0.148078	0.221789	0.238403	0.207922
TCGA-77-A5G6	0.477985	0.512654	0.499197	0.486727	0.448172	0.438765	0.477786	0.410264	0.441618	0.414115
TCGA-77-A5G7	0.231707	0.260506	0.340051	0.303937	0.175713	0.210649	0	0.284577	0.169465	0.223881
TCGA-77-A5G8	0.424963	0.222989	0.367184	0.298806	0.52816	0.284313	0.228984	0.284388	0.383081	0
TCGA-77-A5GA	0.419355	0.327787	0.282008	0.275719	0.187879	0.297029	0.298558	0.330197	0.282619	0.369252
TCGA-77-A5GB	0.18021	0.174281	0.187589	0.159951	0.168561	0.159965	0.204857	0.171276	0.168561	0.164375
TCGA-77-A5GF	0.662393	0.426784	0.525965	0.562488	0.344926	0.565028	0.582532	0.619555	0.429605	0.713047
TCGA-77-A5GH	0.226116	0.195237	0.202823	0.218593	0.245534	0.222123	0.192247	0.208964	0.224069	0.223121
TCGA-78-7145	0.518081	0.414373	0.44249	0.442512	0.515473	0.488886	0.481137	0.418134	0.497245	0.376453
TCGA-78-7146	0.310129	0.398067	0.417451	0.354286	0.442282	0.349085	0.359851	0.383426	0.387612	0.713559
TCGA-78-7147	0.415518	0.539465	0.399044	0.340874	0.466209	0.324157	0.331319	0.386705	0.388829	0.366013
TCGA-78-7148	0.321733	0.392363	0.340537	0.314842	0.352511	0.31181	0.361245	0.300942	0.363856	0.270253
TCGA-78-7149	0.178058	0.166003	0.192232	0.215705	0.176973	0.179176	0.194686	0.216822	0.233212	0.0879121
TCGA-78-7150	0.375615	0.262193	0.256576	0.291296	0.414521	0.322189	0.41817	0.261503	0.38245	0.353429
TCGA-78-7152	0.267147	0.324339	0.206359	0.243009	0.287349	0.237662	0.195087	0.243737	0.24868	0
TCGA-78-7153	0.143586	0.206874	0.177926	0.1522	0.160994	0.161089	0.144935	0.143692	0.161435	0
TCGA-78-7154	0.405222	0.262889	0.271335	0.322189	0.333645	0.413158	0.541667	0.255464	0.126984	0.387346
TCGA-78-7155	0.455127	0.536337	0.481477	0.499854	0.528662	0.473238	0.474377	0.461183	0.429085	0.549208
TCGA-78-7156	0.306091	0.321263	0.366744	0.364339	0.312456	0.362905	0.251892	0.32903	0.32157	0.357692
TCGA-78-7158	0.421384	0.373143	0.310791	0.353809	0.379389	0.357721	0.414076	0.332591	0.299765	0.277778
TCGA-78-7159	0.317328	0.28566	0.295105	0.297765	0.31694	0.30233	0.335591	0.297133	0.318059	0.287356
TCGA-78-7160	0.222222	0.222222	0.11636	0.147637	0.222222	0.181481	0.222222	0.147637	0.222222	0.130769
TCGA-78-7161	0.424812	0.422295	0.413685	0.389937	0.317056	0.292716	0.219544	0.368144	0.281725	0.394208
TCGA-78-7162	0.171875	0.124826	0.133883	0.200223	0.147202	0.143773	0.200223	0.171875	0.147202	0
TCGA-78-7163	0.294118	0	0.294118	0.277952	0	0.296093	0	0.219348	0	0
TCGA-78-7166	0.351917	0.309146	0.367266	0.367228	0.358066	0.358937	0.391194	0.358828	0.430542	0.348839
TCGA-78-7167	0.301728	0.357168	0.300089	0.261569	0.337789	0.286347	0.341951	0.299891	0.337789	0
TCGA-78-7220	0.442658	0.38103	0.42219	0.413084	0.398986	0.410166	0.403475	0.431391	0.390757	0.541807
TCGA-78-7535	0.526628	0.366071	0.382526	0.403954	0.202469	0.394884	0.166667	0.321971	0.202469	0.28
TCGA-78-7536	0.43744	0.469406	0.455253	0.47067	0.414718	0.482255	0.577855	0.536611	0.491046	0.404446
TCGA-78-7537	0.286422	0.356842	0.306713	0.279568	0.347797	0.327747	0.352941	0.236193	0.36996	0.244211
TCGA-78-7539	0.211009	0.204316	0.220134	0.213995	0.237248	0.246021	0.236285	0.199127	0.233688	0.168974
TCGA-78-7540	0.432323	0.374941	0.343222	0.394817	0.415311	0.354151	0.466667	0.40521	0.415311	0.266667
TCGA-78-7542	0.346687	0.397824	0.348972	0.335799	0.278352	0.331143	0.406726	0.34073	0.225409	0
TCGA-78-7633	0.330804	0.315219	0.319461	0.314392	0.30499	0.314252	0.264117	0.276596	0.316465	0
TCGA-78-8640	0.165007	0.190582	0.192263	0.197985	0.190761	0.211071	0.247969	0.227095	0.194272	0.147773
TCGA-78-8648	0	0	0.108108	0.102041	0	0.102041	0	0	0	0
TCGA-78-8655	0.458748	0.494203	0.380057	0.348888	0.31861	0.347674	0.462185	0.405507	0.396603	0.380435
TCGA-78-8660	0.118923	0.129675	0.132509	0.131821	0.144492	0.142223	0.161307	0.144563	0.156069	0.147465
TCGA-78-8662	0.478371	0.508681	0.480691	0.468959	0.429812	0.455421	0.478189	0.449364	0.406552	0.650034
TCGA-79-5596	0.425285	0.464616	0.43309	0.419996	0.334163	0.422384	0.549717	0.549717	0.395035	0.714286
TCGA-80-5607	0.262291	0.229304	0.220782	0.242294	0.232462	0.233234	0.250631	0.24341	0.256387	0.2
TCGA-80-5608	0.245835	0.353707	0.278583	0.255981	0.340976	0.274364	0.5	0.364673	0.243442	0.270526
TCGA-80-5611	0.176825	0.258719	0.217006	0.203985	0.299268	0.240386	0.240663	0.177736	0.287127	0.173228
TCGA-81-5910	0.176319	0.460164	0.315989	0.3194	0.103448	0.314937	0.103448	0.359749	0.103448	0.814815
TCGA-81-5911	0.485974	0.540357	0.540357	0.486201	0.293158	0.454972	0	0.524948	0.263736	0.649123
TCGA-83-5908	0.283062	0.3	0.254253	0.26959	0.266076	0.272727	0.3	0.241742	0.271099	0.130769
TCGA-85-6175	0.0859375	0	0.160927	0.0863019	0.186456	0.148915	0	0.109006	0.114397	0
TCGA-85-6560	0.323074	0.339794	0.317274	0.299611	0.363226	0.307175	0.332226	0.35087	0.261434	0.308917
TCGA-85-6561	0.252591	0.262891	0.243974	0.228062	0.183994	0.231383	0.301275	0.22685	0.25283	0.296606
TCGA-85-6798	0.473674	0.455179	0.335551	0.275789	0.284269	0.266067	0.378072	0.379654	0.30168	0.62069
TCGA-85-7696	0.66	0.530344	0.322363	0.30417	0.305457	0.326526	0.66	0.47945	0.273926	0.419134
TCGA-85-7697	0.153128	0.145142	0.153753	0.23659	0.199301	0.163831	0.225809	0.184529	0.199007	0.09375
TCGA-85-7698	0.644068	0.401664	0.267108	0.303251	0.240964	0.312451	0.343056	0.391061	0.293559	0.570519
TCGA-85-7699	0.311148	0.263458	0.283572	0.282253	0.296584	0.276362	0.236775	0.2612	0.308079	0.259936
TCGA-85-7710	0.405354	0.388855	0.424073	0.389545	0.314521	0.366568	0.36766	0.380764	0.303936	0.454815
TCGA-85-7843	0.279549	0.429606	0.361438	0.296637	0.249437	0.30002	0.267311	0.311842	0.241482	0.634146
TCGA-85-7844	0.214624	0.207843	0.258026	0.243366	0.240515	0.2322	0.290206	0.222274	0.215464	0.367063
TCGA-85-7950	0.384789	0.409498	0.339342	0.360366	0.389707	0.393209	0.503876	0.347166	0.390403	0.388504
TCGA-85-8048	0.282037	0.183385	0.203292	0.136522	0.0882353	0.131403	0.194033	0.12926	0.209519	0.195652
TCGA-85-8049	0.0946641	0	0.0851718	0.0888148	0.106789	0.0933263	0.106265	0.0871495	0.101601	0.100069
TCGA-85-8052	0.388889	0.234444	0.295362	0.27181	0.0987126	0.221542	0.388889	0.264948	0.10241	0.388889
TCGA-85-8070	0.7823	0.509449	0.502462	0.49527	0.355762	0.591408	0.926044	0.560953	0.180835	0.48216
TCGA-85-8071	0.438756	0.428416	0.430759	0.418612	0.554941	0.475463	0.392814	0.344496	0.508549	0.337349
TCGA-85-8072	0.282365	0.248383	0.249041	0.225404	0.343473	0.25371	0.305338	0.277996	0.330743	0.201664
TCGA-85-8276	0.207876	0.173074	0.211118	0.224612	0.23448	0.225566	0.177277	0.167649	0.231495	0.113765
TCGA-85-8277	0.407505	0.526589	0.378125	0.407133	0.285165	0.414445	0.516873	0.409439	0.165872	0.457718
TCGA-85-8287	0.245497	0.242181	0.332118	0.302604	0.27489	0.302172	0.347194	0.269204	0.157516	0.225
TCGA-85-8288	0.293488	0.249612	0.311561	0.326108	0.378501	0.357304	0.220426	0.269881	0.322219	0.454545
TCGA-85-8350	0.302212	0.240856	0.266494	0.267244	0.253939	0.266692	0.31	0.289855	0.182079	0.220779
TCGA-85-8351	0.388971	0.328953	0.339149	0.315398	0.263608	0.322483	0.359028	0.446165	0.365193	0.608108
TCGA-85-8352	0.60263	0.70002	0.685177	0.597849	0.62272	0.62558	0.60263	0.757043	0.608264	0.695803
TCGA-85-8353	0.190544	0.221927	0.192748	0.212866	0.184752	0.217539	0.249909	0.228492	0.157579	0.244343
TCGA-85-8354	0.574447	0.467655	0.459669	0.416053	0.376876	0.410493	0.475776	0.511193	0.352354	0.804348
TCGA-85-8355	0.150844	0.180976	0.163725	0.179937	0.135012	0.149906	0.181818	0.158336	0.124903	0.157187
TCGA-85-8479	0.278474	0.328275	0.32088	0.345131	0.3258	0.345721	0.44052	0.347826	0.300626	0
TCGA-85-8481	0.185836	0.252968	0.214196	0.162694	0.212728	0.188796	0.248499	0.164447	0.176697	0.139064
TCGA-85-8580	0.251967	0.209268	0.252293	0.2155	0.195158	0.198801	0.18317	0.19595	0.163717	0.190742
TCGA-85-8582	0.168843	0.154605	0.175958	0.155769	0.152322	0.15302	0.176726	0.213479	0.160083	0.168262
TCGA-85-8584	0.208667	0.235664	0.234639	0.197432	0.171304	0.181652	0.191585	0.223566	0.206582	0.233577
TCGA-85-8664	0.403431	0.463429	0.358986	0.380416	0.340663	0.354517	0.601264	0.407383	0.336907	0.419042
TCGA-85-8666	0.207176	0.18409	0.19309	0.167059	0.244651	0.185194	0.1116	0.164337	0.242653	0.295652
TCGA-85-A4CL	0.28909	0.303451	0.288114	0.316387	0.286147	0.323945	0.338517	0.325621	0.32248	0.268395
TCGA-85-A4CN	0.268987	0.249654	0.270628	0.287737	0.248226	0.267244	0.185185	0.290646	0.345192	0.255433
TCGA-85-A4JB	0.23477	0.25812	0.241643	0.224479	0.214771	0.235057	0.230828	0.227374	0.182486	0.19708
TCGA-85-A4JC	0.188662	0.199009	0.176501	0.180129	0.142981	0.172241	0.20913	0.181526	0.166648	0.197154
TCGA-85-A4PA	0	0	0	0	0	0	0	0	0	0
TCGA-85-A4QQ	0.241033	0.2901	0.283229	0.273056	0.247008	0.266164	0.312618	0.307257	0.258612	0.309509
TCGA-85-A4QR	0.481881	0.432198	0.401119	0.43475	0.332693	0.456552	0.609015	0.524792	0.298171	0.773585
TCGA-85-A50M	0.24237	0.222186	0.155501	0.191438	0.121212	0.214723	0.339286	0.220148	0.121212	0.339286
TCGA-85-A50Z	0.155065	0.17588	0.175738	0.180191	0.167705	0.183693	0.221226	0.198186	0.197042	0.178734
TCGA-85-A510	0.338711	0.367786	0.313053	0.273241	0.362345	0.339139	0.55	0.254109	0.350251	0.55
TCGA-85-A511	0.202238	0.236524	0.171883	0.176387	0.149312	0.176693	0.22598	0.175262	0.22239	0.163645
TCGA-85-A512	0.261665	0.395804	0.360756	0.400519	0.39879	0.409809	0.250314	0.333125	0.265953	0.349727
TCGA-85-A513	0.144599	0.0689655	0.112032	0.113647	0	0.113647	0	0.146341	0	0
TCGA-85-A53L	0.203975	0.261604	0.211704	0.241411	0.239141	0.234416	0.291506	0.239983	0.240587	0.258242
TCGA-85-A5B5	0.501053	0.509669	0.396202	0.397701	0.34217	0.404566	0.47078	0.472723	0.465478	0.877551
TCGA-86-6562	0.0769231	0	0.247322	0.255666	0.0769231	0.325527	0.252417	0.417722	0.0769231	0
TCGA-86-6851	0.248642	0.246773	0.218119	0.226087	0.221297	0.234466	0.265133	0.237855	0.219917	0.251734
TCGA-86-7701	0.355286	0.316656	0.268366	0.206909	0.302667	0.257621	0.291751	0.24528	0.231289	0.310339
TCGA-86-7711	0.150442	0.118536	0.147591	0.161605	0.223612	0.177905	0.158534	0.153739	0.201532	0.258302
TCGA-86-7713	0.348431	0.544503	0.434719	0.415103	0.338639	0.354279	0.379886	0.41655	0.299685	0.584615
TCGA-86-7714	0.335785	0.318987	0.303411	0.33595	0.354923	0.344826	0.383462	0.33316	0.354951	0
TCGA-86-7953	0.167964	0.228448	0.135124	0.216955	0.206897	0.246262	0.206897	0.13817	0.199752	0.0694444
TCGA-86-7954	0.216157	0.208339	0.196501	0.164549	0.143729	0.149894	0.230569	0.169502	0.162634	0.213416
TCGA-86-7955	0.389989	0.405707	0.479856	0.395814	0.443185	0.402418	0.408366	0.4129	0.529424	0.482455
TCGA-86-8054	0.437318	0.37775	0.359707	0.442921	0.29928	0.381394	0.215757	0.311247	0.247041	0.362065
TCGA-86-8055	0.438366	0.478304	0.402474	0.438366	0.253781	0.438366	0.299616	0.438366	0.253781	0.240741
TCGA-86-8056	0.19087	0.225105	0.210379	0.20384	0.210219	0.198318	0.238958	0.203036	0.154966	0.29704
TCGA-86-8073	0.163045	0.189497	0.177369	0.159682	0.177633	0.175613	0.171985	0.162737	0.169805	0.184069
TCGA-86-8074	0.64	0.564186	0.353491	0.336608	0.172304	0.240534	0.377143	0.64	0.162791	0.64
TCGA-86-8075	0.423963	0.423963	0.333092	0.333092	0	0.333092	0.345456	0.410227	0	0.428571
TCGA-86-8076	0.113208	0.113208	0.100007	0.0957424	0.122283	0.100314	0.0831995	0.112159	0.103793	0
TCGA-86-8278	0.11732	0.127972	0.157967	0.131289	0.103716	0.131417	0.129423	0.114972	0.103716	0.15
TCGA-86-8279	0.464277	0.384526	0.435855	0.44374	0.433345	0.468854	0.531602	0.485234	0.413919	0.459049
TCGA-86-8280	0.30879	0.220086	0.147133	0.18374	0.224138	0.217993	0.30879	0.264803	0.224138	0.393443
TCGA-86-8281	0.319274	0.243054	0.247048	0.267135	0.286695	0.297025	0.286921	0.235745	0.315221	0
TCGA-86-8358	0.534843	0.453914	0.436044	0.441915	0.451712	0.425096	0.390474	0.466183	0.462609	0.321881
TCGA-86-8359	0.148011	0.235165	0.235165	0.192378	0.172819	0.187067	0.181319	0.181319	0.191484	0.268195
TCGA-86-8585	0.221701	0.23306	0.23645	0.22475	0.22593	0.230628	0.157017	0.209988	0.235989	0.195232
TCGA-86-8668	0.151351	0.151351	0.109767	0.109767	0	0.109767	0.0681818	0.109767	0	0.0543478
TCGA-86-8669	0.384184	0.233863	0.274704	0.254884	0.327926	0.242882	0.190827	0.263907	0.179856	0
TCGA-86-8671	0.104413	0.0711462	0.0837349	0.145833	0.0609078	0.0892163	0.145833	0.145833	0.0787934	0
TCGA-86-8672	0.282097	0.24797	0.274104	0.241054	0.219178	0.2259	0.229155	0.218781	0.222966	0.251756
TCGA-86-8673	0.2554	0.2366	0.23271	0.224266	0.246628	0.211365	0.262546	0.207244	0.222605	0.184013
TCGA-86-8674	0.254278	0.25212	0.244373	0.260929	0.275395	0.252454	0.225816	0.239099	0.270108	0.235983
TCGA-86-A456	0.17077	0.207949	0.167627	0.178172	0.166832	0.166636	0.193915	0.154075	0.185929	0.042328
TCGA-86-A4JF	0.176697	0.181984	0.181038	0.167931	0.177699	0.164849	0.138333	0.174637	0.190855	0.137723
TCGA-86-A4P7	0.11907	0	0.120018	0.123577	0.134483	0.126096	0.105973	0.114426	0.124406	0.0857143
TCGA-87-5896	0.4	0	0.390476	0.357143	0.4	0.357143	0	0	0.445902	0.377289
TCGA-90-7766	0.309197	0.274228	0.309306	0.290263	0.291711	0.294518	0.291071	0.357143	0.264429	0
TCGA-90-7767	0.473485	0.387931	0.322623	0.355226	0.273017	0.342123	0.5	0.473485	0.337037	0.427419
TCGA-90-7769	0.314372	0.298902	0.306962	0.34506	0.319787	0.346423	0.40546	0.429343	0.358089	0.33296
TCGA-90-7964	0.341854	0.359726	0.320481	0.342322	0.311215	0.31828	0.318114	0.319387	0.331698	0.37086
TCGA-90-A4ED	0.310284	0.279446	0.304388	0.299592	0.313552	0.302394	0.297342	0.29896	0.30689	0.32759
TCGA-90-A4EE	0.253278	0.188384	0.214764	0.211078	0.251942	0.226077	0.246118	0.261736	0.238346	0.229885
TCGA-90-A59Q	0.223447	0.222463	0.218586	0.201906	0.162706	0.182942	0.181908	0.185442	0.21254	0.104478
TCGA-91-6828	0.271535	0.297735	0.241829	0.223223	0.281081	0.24857	0.377621	0.387029	0.282881	0.0842105
TCGA-91-6829	0.369837	0.309313	0.312347	0.322714	0.284724	0.336584	0.245054	0.29199	0.260273	0.31302
TCGA-91-6830	0.131792	0.115187	0.140514	0.141206	0.141251	0.146722	0.16902	0.143467	0.145493	0.137931
TCGA-91-6831	0.224171	0.256871	0.271037	0.315236	0.26844	0.362385	0.339881	0.392752	0.234754	0.568627
TCGA-91-6835	0.116337	0.150093	0.116337	0.132107	0.116797	0.120412	0.183522	0.121717	0.123792	0.090903
TCGA-91-6836	0.481465	0.528528	0.455903	0.461573	0.4775	0.467351	0.483567	0.490828	0.403378	0.504313
TCGA-91-6840	0.480942	0.530145	0.35705	0.332048	0.235247	0.287616	0.432105	0.319529	0.229905	0.44
TCGA-91-6847	0.75	0.430901	0.415034	0.310335	0	0.393881	0.75	0.459507	0	0.415034
TCGA-91-6848	0.249453	0.234885	0.252161	0.280574	0.27765	0.279121	0.260501	0.244952	0.305992	0.231733
TCGA-91-6849	0.349112	1	0.336887	0.326394	0.266166	0.264104	0	0.223434	0.265116	0
TCGA-91-7771	0.167778	0.236976	0.198672	0.189701	0.20338	0.192336	0.141697	0.220159	0.235645	0.166667
TCGA-91-8496	0	0.0423729	0.0423729	0.204082	0.102804	0.204082	0	0.204082	0.102804	0
TCGA-91-8497	0.0769231	0.0769231	0.16438	0.0729969	0	0.0729969	0.0784314	0.0776772	0	0
TCGA-91-8499	0.306306	0.390105	0.452717	0.40607	0.283875	0.375906	0.454009	0.426369	0.352588	0.56279
TCGA-91-A4BC	0.245407	0.255101	0.186771	0.204033	0.186469	0.21551	0.215487	0.220519	0.183517	0.195793
TCGA-91-A4BD	0.287398	0.3125	0.287398	0.287398	0.298491	0.298491	0	0	0.298491	0
TCGA-92-7340	0.151583	0.111705	0.152782	0.187162	0.12827	0.163598	0.127065	0.176411	0.142818	0.102821
TCGA-92-7341	0.37037	0.480991	0.305976	0.33544	0.302552	0.32747	0.37037	0.360224	0.258164	0.37037
TCGA-92-8063	0.242659	0.227726	0.265717	0.274764	0.243349	0.289667	0.24897	0.281862	0.20472	0
TCGA-92-8064	0.177471	0.0781819	0.170759	0.163978	0.226826	0.202317	0.120407	0.153996	0.203826	0.165013
TCGA-92-8065	0.239463	0.231297	0.242252	0.265415	0.211398	0.25022	0.211732	0.248385	0.229645	0.121212
TCGA-93-7347	0.0781533	0.126342	0.123005	0.158992	0.205821	0.169347	0.279091	0.0769231	0.160179	0.197368
TCGA-93-7348	0.268672	0.255629	0.257227	0.247703	0.233162	0.235472	0.291284	0.224764	0.180308	0.0517241
TCGA-93-8067	0.219332	0.227343	0.220961	0.201066	0.221989	0.213485	0.228703	0.248517	0.212863	0.201845
TCGA-93-A4JN	0.384615	0.310729	0.235456	0.260634	0.244437	0.262784	0.384615	0.235456	0	0.310729
TCGA-93-A4JO	0.159705	0.159953	0.14419	0.136647	0.198462	0.136647	0.152203	0.13074	0.173862	0.0821918
TCGA-93-A4JP	0.139034	0.136549	0.118251	0.113285	0.131579	0.10896	0.190476	0.139034	0	0.161028
TCGA-93-A4JQ	0.0681818	0.0439024	0.0706194	0.0737763	0.0518672	0.0874151	0.05	0.0380155	0.140665	0.05
TCGA-94-7033	0.27874	0.2559	0.260423	0.266522	0.300711	0.284138	0.24	0.29864	0.273201	0.226126
TCGA-94-7557	0	0.220714	0.375789	0.315818	0.157938	0.157938	0.12	0.195876	0.133594	0
TCGA-94-7943	0.383474	0.423396	0.429144	0.267746	0.359823	0.285003	0.457965	0.355462	0.166667	0.329557
TCGA-94-8035	0.226919	0.194845	0.230561	0.255092	0.213229	0.242853	0.224804	0.188656	0.181374	0.200133
TCGA-94-8490	0.335632	0.339955	0.309901	0.312376	0.355887	0.297527	0.248129	0.303976	0.283427	0.36558
TCGA-94-8491	0.185212	0.24534	0.216381	0.236743	0.221023	0.21645	0.294798	0.252289	0.247835	0.275362
TCGA-94-A4VJ	0.355683	0.302481	0.336402	0.326501	0.253398	0.31162	0.22736	0.280486	0.234658	0.269168
TCGA-94-A5I4	0.491288	0.402407	0.373188	0.40471	0.37755	0.417482	0.452877	0.3674	0.392226	0.367562
TCGA-94-A5I6	0.185455	0.223529	0.174066	0.18531	0.21533	0.209535	0.179076	0.240195	0.208345	0.227696
TCGA-95-7039	0.288647	0.317065	0.278843	0.264587	0.275503	0.284977	0.277327	0.275392	0.264318	0.304831
TCGA-95-7043	0.552588	0.578844	0.499186	0.546046	0.523682	0.526177	0.502131	0.530892	0.523156	0.711298
TCGA-95-7562	0.532229	0.536228	0.492775	0.385517	0.500454	0.384837	0.46034	0.457445	0.46296	0.477098
TCGA-95-7567	0.216627	0.246425	0.195508	0.200972	0.192799	0.197355	0.263223	0.220615	0.239393	0.242101
TCGA-95-7944	0.19344	0.194887	0.189647	0.190276	0.166984	0.194753	0.193951	0.175753	0.173918	0.193731
TCGA-95-7947	0.310803	0.333005	0.330721	0.321203	0.376094	0.35363	0.272202	0.350019	0.372064	0.337418
TCGA-95-7948	0.336309	0.279151	0.257512	0.301209	0.219507	0.239233	0.241452	0.251353	0.20355	0
TCGA-95-8039	0.217574	0.230769	0.213354	0.212688	0.282141	0.262942	0.230769	0.201592	0.282141	0.230769
TCGA-95-8494	0.564103	0.317384	0.262157	0.225745	0	0.275701	0.369261	0.267644	0	0.485755
TCGA-95-A4VK	0.243504	0.179682	0.240258	0.245127	0.21632	0.251251	0.210951	0.22471	0.131579	0.237034
TCGA-95-A4VN	0.155523	0.161601	0.149274	0.15269	0.109465	0.133425	0.157234	0.140453	0.133061	0.218916
TCGA-95-A4VP	0.177931	0.207786	0.178442	0.20952	0.172128	0.181388	0.275862	0.226166	0.185563	0.183333
TCGA-96-7544	0.305691	0.256918	0.255332	0.280895	0.25746	0.26076	0.292471	0.261714	0.305375	0.408791
TCGA-96-7545	0.27	0.250608	0.239469	0.18715	0.224704	0.211643	0.250175	0.18872	0.173316	0.177049
[truncated: 7,486 more rows]

## Sheet: Supp_table_6_rank_per_patient
patient_id	angiogenesis	metabolism	death	proliferation	inflammation	metastasis	immortality	growth	immune	genome instability
TCGA-02-0003	6	6	4	2	9	2	5	6	9	1
TCGA-02-0033	7	8	3	6	9	4	2	5	10	1
TCGA-02-0047	3	1	2	8	9	7	6	4	5	10
TCGA-02-0055	9	4	6	10	5	8	1	2	7	2
TCGA-02-2466	7	5	2	3	8	4	10	6	9	1
TCGA-02-2470	7	1	4	5	8	6	10	3	9	1
TCGA-02-2483	7	6	7	1	10	1	1	1	9	1
TCGA-02-2485	1	4	9	6	2	5	10	8	2	7
TCGA-02-2486	5	1	4	2	7	3	7	7	7	6
TCGA-04-1331	3	7	6	5	9	8	4	1	10	2
TCGA-04-1332	3	4	7	8	5	6	9	1	10	1
TCGA-04-1336	1	1	6	7	9	7	4	5	10	1
TCGA-04-1341	1	4	6	5	9	3	7	2	9	8
TCGA-04-1342	3	5	4	6	2	8	1	7	9	10
TCGA-04-1343	5	1	4	3	6	8	9	2	7	9
TCGA-04-1346	4	5	6	7	9	8	1	3	9	1
TCGA-04-1347	6	4	2	9	7	8	3	5	10	1
TCGA-04-1348	1	5	7	8	9	6	1	3	9	4
TCGA-04-1349	7	5	9	8	3	6	2	4	10	1
TCGA-04-1353	2	2	2	1	2	2	2	2	2	2
TCGA-04-1356	5	3	8	6	10	7	1	4	9	2
TCGA-04-1357	9	10	2	5	4	6	7	3	1	8
TCGA-04-1360	4	8	7	9	3	6	1	5	10	2
TCGA-04-1361	2	6	5	7	9	8	3	4	10	1
TCGA-04-1362	5	6	8	4	10	3	1	7	9	1
TCGA-04-1367	1	7	9	10	6	8	3	5	4	2
TCGA-04-1369	6	3	7	8	9	5	4	2	10	1
TCGA-04-1516	3	5	2	6	1	4	7	7	7	7
TCGA-04-1542	4	5	6	8	9	7	1	2	10	3
TCGA-04-1638	6	5	4	7	1	9	10	2	8	3
TCGA-04-1644	9	1	3	6	4	5	9	8	2	7
TCGA-04-1646	3	3	3	1	7	2	8	3	8	8
TCGA-04-1648	2	10	3	5	4	6	9	1	8	7
TCGA-04-1649	3	4	8	7	10	9	1	5	6	1
TCGA-04-1651	3	2	4	10	1	9	6	5	8	7
TCGA-04-1652	2	6	5	7	10	9	1	3	8	4
TCGA-04-1655	2	5	2	7	10	8	4	6	9	1
TCGA-05-4244	4	9	6	3	8	2	1	5	7	10
TCGA-05-4249	5	7	4	6	8	9	3	10	2	1
TCGA-05-4250	8	6	7	5	1	4	3	9	2	10
TCGA-05-4382	7	4	1	2	9	6	8	5	10	3
TCGA-05-4384	4	3	6	7	5	9	1	8	2	10
TCGA-05-4389	3	6	9	4	5	7	1	8	2	10
TCGA-05-4390	9	10	7	5	4	6	3	1	2	8
TCGA-05-4395	1	2	5	6	9	4	8	7	10	3
TCGA-05-4396	6	10	3	2	5	4	9	7	8	1
TCGA-05-4397	8	10	6	2	4	5	3	7	9	1
TCGA-05-4398	5	9	3	2	7	6	8	4	10	1
TCGA-05-4402	3	8	7	5	1	4	9	9	2	6
TCGA-05-4403	4	5	6	8	10	7	1	9	2	3
TCGA-05-4405	8	10	6	4	1	5	7	9	2	3
TCGA-05-4410	1	4	2	5	10	3	6	7	9	8
TCGA-05-4415	1	8	2	5	6	3	4	7	9	10
TCGA-05-4417	3	2	5	9	7	10	6	4	8	1
TCGA-05-4418	8	1	9	7	5	4	10	6	2	3
TCGA-05-4420	5	1	2	3	10	7	8	6	9	4
TCGA-05-4422	9	4	3	5	1	2	8	7	6	10
TCGA-05-4424	10	1	9	5	6	8	2	7	4	3
TCGA-05-4425	8	1	2	3	8	7	4	6	10	5
TCGA-05-4426	9	7	8	4	1	3	5	5	1	9
TCGA-05-4427	3	8	7	5	10	6	2	4	9	1
TCGA-05-4430	9	1	10	6	5	8	2	3	7	4
TCGA-05-4432	10	2	5	3	8	7	6	4	9	1
TCGA-05-4433	3	4	5	9	1	9	8	6	1	7
TCGA-05-4434	6	2	9	8	4	5	10	7	1	2
TCGA-05-5420	8	8	5	4	1	2	8	6	3	6
TCGA-05-5423	4	5	6	8	7	9	1	3	10	2
TCGA-05-5425	3	9	8	7	4	10	5	6	1	2
TCGA-05-5428	7	2	6	4	9	3	10	5	8	1
TCGA-05-5429	3	9	2	4	5	7	1	8	6	10
TCGA-05-5715	8	2	5	4	9	6	1	3	10	7
TCGA-06-0119	8	7	9	5	3	2	10	1	3	6
TCGA-06-0122	4	8	9	4	2	3	10	4	7	1
TCGA-06-0124	9	1	3	4	7	6	9	4	8	1
TCGA-06-0125	2	1	3	6	9	5	8	4	7	10
TCGA-06-0126	4	5	7	8	2	8	1	6	10	3
TCGA-06-0128	8	1	3	8	4	6	7	2	4	10
TCGA-06-0129	7	2	6	7	9	4	4	3	10	1
TCGA-06-0130	5	1	5	7	10	7	1	1	9	1
TCGA-06-0132	3	3	1	2	3	3	3	3	3	3
TCGA-06-0137	1	7	9	3	5	4	7	1	6	10
TCGA-06-0139	6	6	6	1	1	1	6	1	1	6
TCGA-06-0140	1	1	1	4	8	5	8	5	7	8
TCGA-06-0141	7	7	1	1	1	1	7	1	6	7
TCGA-06-0142	1	1	1	1	7	1	7	1	7	7
TCGA-06-0145	4	1	9	6	2	10	7	5	2	8
TCGA-06-0151	1	1	4	4	6	7	9	8	1	9
TCGA-06-0152	9	1	8	2	4	3	9	6	4	6
TCGA-06-0154	3	1	5	3	8	6	9	1	7	9
TCGA-06-0155	9	6	8	7	2	4	10	5	3	1
TCGA-06-0157	1	3	5	6	9	4	9	1	8	7
TCGA-06-0158	2	8	4	7	3	6	9	5	1	9
TCGA-06-0166	6	1	3	8	5	9	10	4	6	1
TCGA-06-0168	7	1	1	1	7	1	1	1	7	7
TCGA-06-0169	4	6	4	3	6	1	1	6	6	6
TCGA-06-0171	4	1	5	6	3	7	8	9	2	10
TCGA-06-0173	5	6	2	1	7	3	8	4	8	10
TCGA-06-0174	3	1	4	5	7	6	9	2	8	9
TCGA-06-0184	5	3	7	7	1	7	6	7	1	3
TCGA-06-0185	6	6	6	5	1	4	9	3	2	9
TCGA-06-0187	10	3	4	4	7	9	6	1	8	1
TCGA-06-0188	6	7	9	8	1	3	4	9	1	5
TCGA-06-0189	3	6	3	1	9	1	6	3	9	8
TCGA-06-0190	9	5	2	3	6	8	9	7	1	4
TCGA-06-0192	10	2	6	8	3	4	9	7	5	1
TCGA-06-0195	10	4	3	7	9	5	8	2	6	1
TCGA-06-0209	1	1	7	8	3	5	10	6	3	9
TCGA-06-0210	8	7	5	3	2	6	8	3	1	10
TCGA-06-0211	8	6	4	5	3	7	10	9	2	1
TCGA-06-0213	9	1	5	6	10	6	4	3	8	1
TCGA-06-0214	5	8	1	2	6	3	10	3	6	9
TCGA-06-0216	8	2	5	3	8	6	8	3	7	1
TCGA-06-0219	4	2	4	4	4	3	1	4	4	4
TCGA-06-0221	7	2	3	5	7	3	7	6	1	7
TCGA-06-0237	2	5	5	2	10	2	7	1	9	7
TCGA-06-0238	6	6	3	2	6	4	6	1	5	6
TCGA-06-0240	4	9	1	1	4	1	4	4	9	4
TCGA-06-0241	7	1	8	4	9	6	5	1	10	1
TCGA-06-0644	5	5	9	7	10	7	1	3	2	4
TCGA-06-0645	8	6	3	4	1	4	8	7	1	8
TCGA-06-0646	8	1	6	7	2	4	8	8	2	5
TCGA-06-0648	5	8	5	1	4	1	8	1	5	8
TCGA-06-0649	10	8	6	5	4	7	8	3	1	2
TCGA-06-0650	8	5	6	2	8	4	1	2	8	6
TCGA-06-0686	2	8	5	3	9	6	1	4	9	7
TCGA-06-0743	6	7	5	4	2	3	1	7	10	9
TCGA-06-0744	8	1	7	6	10	1	1	1	9	5
TCGA-06-0745	7	5	2	1	6	4	3	7	7	7
TCGA-06-0747	7	1	6	5	2	3	7	9	4	9
TCGA-06-0749	9	6	5	6	2	4	1	6	2	10
TCGA-06-0750	3	8	3	3	7	9	1	3	1	10
TCGA-06-0875	10	2	4	5	8	7	6	3	9	1
TCGA-06-0876	10	2	3	4	8	7	9	5	6	1
TCGA-06-0877	10	3	9	6	2	1	7	3	5	8
TCGA-06-0878	6	6	3	3	1	3	6	6	2	6
TCGA-06-0879	2	1	2	4	6	5	8	8	6	8
TCGA-06-0881	1	2	4	4	9	6	9	2	8	7
TCGA-06-0882	10	5	9	6	1	6	2	8	2	4
TCGA-06-0939	6	3	2	4	6	5	1	6	6	6
TCGA-06-1084	10	6	8	3	9	2	1	4	7	5
TCGA-06-1087	5	8	7	6	10	4	2	3	9	1
TCGA-06-1800	3	5	6	7	9	8	2	4	10	1
TCGA-06-1801	7	3	10	5	8	6	1	2	9	4
TCGA-06-1802	5	6	9	4	2	3	1	8	7	10
TCGA-06-1804	5	7	6	1	4	2	9	7	3	10
TCGA-06-1805	10	2	8	6	7	4	5	9	3	1
TCGA-06-1806	5	1	1	6	1	6	8	8	1	8
TCGA-06-2557	5	5	3	5	5	1	3	2	5	5
TCGA-06-2558	7	2	5	6	9	8	1	2	10	2
TCGA-06-2559	8	4	3	6	2	9	7	4	10	1
TCGA-06-2561	4	4	4	8	2	9	1	4	2	10
TCGA-06-2562	1	5	2	3	9	8	6	6	4	10
TCGA-06-2563	1	4	3	5	10	6	7	1	9	7
TCGA-06-2564	7	1	3	2	5	4	7	7	5	7
TCGA-06-2565	3	8	7	4	1	4	10	6	1	9
TCGA-06-2566	3	1	2	4	8	7	5	6	10	9
TCGA-06-2567	7	7	4	4	9	3	1	6	9	1
TCGA-06-2569	6	1	3	6	5	6	6	2	4	6
TCGA-06-2570	2	7	5	5	9	2	2	8	9	1
TCGA-06-5408	4	1	5	6	3	7	7	7	2	10
TCGA-06-5410	8	8	8	3	2	5	4	1	7	6
TCGA-06-5411	8	2	6	2	8	4	8	4	1	7
TCGA-06-5412	6	9	5	4	8	3	1	2	6	10
TCGA-06-5413	3	1	9	5	7	6	1	4	8	10
TCGA-06-5414	6	1	5	1	3	6	6	6	3	6
TCGA-06-5415	2	2	2	2	1	2	2	2	2	2
TCGA-06-5416	6	4	7	10	3	8	5	2	9	1
TCGA-06-5418	10	2	2	5	8	7	1	5	9	2
TCGA-06-5856	2	9	4	6	8	5	1	3	7	10
TCGA-06-5858	8	2	3	6	10	5	7	4	9	1
TCGA-06-5859	7	7	4	5	1	2	7	3	6	7
TCGA-06-6388	6	4	3	2	7	5	8	1	8	8
TCGA-06-6389	2	5	6	8	10	7	1	3	9	4
TCGA-06-6390	2	6	1	2	4	6	6	6	4	6
TCGA-06-6391	6	2	9	8	3	7	1	5	3	10
TCGA-06-6693	4	4	1	2	4	3	4	4	4	4
TCGA-06-6694	5	1	4	7	2	8	3	9	6	10
TCGA-06-6695	3	1	6	2	7	4	9	8	5	10
TCGA-06-6697	6	8	2	1	7	3	8	5	4	10
TCGA-06-6698	7	8	5	4	10	3	6	1	9	2
TCGA-06-6699	7	7	3	2	5	1	7	6	4	7
TCGA-06-6700	3	6	2	5	7	3	7	7	1	7
TCGA-06-6701	1	8	1	5	10	5	1	5	9	1
TCGA-06-A5U0	2	9	9	2	6	8	2	2	6	1
TCGA-06-A5U1	4	3	7	5	1	6	8	8	1	10
TCGA-06-A6S0	9	5	2	1	7	4	5	3	7	9
TCGA-06-A6S1	4	6	1	5	8	3	9	6	2	9
TCGA-06-A7TK	6	8	3	1	7	2	9	4	5	10
TCGA-06-A7TL	1	5	6	6	9	6	1	1	9	1
TCGA-08-0386	6	7	4	5	1	3	7	7	1	7
TCGA-09-0364	2	9	3	4	5	7	1	6	8	10
TCGA-09-0365	4	3	6	8	9	7	1	4	10	1
TCGA-09-0366	5	1	9	8	10	7	4	6	3	1
TCGA-09-0367	6	7	8	9	4	5	1	2	10	3
TCGA-09-0369	3	2	4	7	6	5	8	9	10	1
TCGA-09-1664	5	8	7	3	9	4	1	6	2	10
TCGA-09-1670	4	6	8	3	9	5	1	2	9	7
TCGA-09-1672	2	2	8	8	1	7	2	2	2	10
TCGA-09-1673	3	8	1	7	9	5	3	6	9	2
TCGA-09-1674	10	6	2	7	9	8	4	5	1	3
TCGA-09-1675	8	3	7	1	8	2	3	3	8	6
TCGA-09-2043	4	2	5	8	9	6	1	3	10	7
TCGA-09-2044	6	2	3	8	10	9	1	7	5	4
TCGA-09-2045	1	8	7	4	9	6	1	4	10	3
TCGA-09-2049	5	6	4	7	8	10	1	3	9	2
TCGA-09-2050	4	9	7	10	5	8	1	6	2	3
TCGA-09-2051	5	10	7	8	2	6	9	3	1	4
TCGA-09-2053	7	6	8	5	9	4	2	3	10	1
TCGA-09-2055	7	2	6	3	8	5	9	4	10	1
TCGA-09-2056	5	1	6	3	7	2	7	4	7	7
TCGA-10-0926	1	8	7	6	9	5	1	4	9	3
TCGA-10-0927	2	5	5	4	1	2	7	7	7	7
TCGA-10-0928	3	1	1	3	3	3	3	3	3	3
TCGA-10-0930	9	1	2	8	5	3	10	7	6	4
TCGA-10-0931	1	1	4	5	9	7	7	5	10	1
TCGA-10-0933	8	6	9	5	1	7	3	3	1	10
TCGA-10-0934	1	1	1	1	9	1	1	1	9	1
TCGA-10-0935	2	2	4	5	9	7	1	6	10	8
TCGA-10-0937	1	1	1	1	9	1	1	1	9	1
TCGA-12-0615	9	5	7	1	3	2	9	6	3	8
TCGA-12-0616	5	1	4	2	7	2	7	6	7	7
TCGA-12-0618	1	1	6	8	9	7	5	1	10	1
TCGA-12-0619	3	5	4	6	9	7	1	8	9	1
TCGA-12-0656	7	5	6	10	1	9	3	8	1	4
TCGA-12-0657	4	1	3	5	2	5	8	7	9	10
TCGA-12-0662	8	5	3	2	10	1	7	6	9	4
TCGA-12-0670	1	2	3	8	5	4	5	9	5	10
TCGA-12-0688	7	8	5	3	9	2	4	1	6	10
TCGA-12-0691	4	3	8	7	9	5	1	6	10	1
TCGA-12-0692	7	2	6	3	8	3	1	5	9	9
TCGA-12-0707	8	3	4	6	9	5	7	2	10	1
TCGA-12-0773	4	5	8	7	6	9	1	3	10	1
TCGA-12-0775	7	1	3	8	2	9	4	10	5	6
TCGA-12-0778	7	9	6	4	5	3	2	1	8	10
TCGA-12-0818	5	1	6	8	9	7	3	4	10	2
TCGA-12-0819	3	3	8	9	7	6	2	3	10	1
TCGA-12-0820	2	9	8	3	4	7	6	1	5	10
TCGA-12-0821	8	1	10	5	1	5	1	4	7	9
TCGA-12-0822	4	7	8	5	6	3	1	2	9	10
TCGA-12-0826	8	9	7	2	5	3	4	10	6	1
TCGA-12-0827	6	4	5	2	7	3	1	10	8	9
TCGA-12-0828	10	1	5	7	8	6	3	4	9	2
TCGA-12-0829	9	1	5	7	3	8	4	6	2	10
TCGA-12-1088	2	6	8	9	4	10	3	7	5	1
TCGA-12-1089	2	4	7	6	8	3	10	5	9	1
TCGA-12-1092	2	8	2	5	1	7	2	5	10	9
TCGA-12-1093	4	5	2	6	3	7	9	8	1	10
TCGA-12-1597	3	7	5	2	6	4	7	1	7	7
TCGA-12-1598	6	8	7	4	9	5	1	2	10	3
TCGA-12-1599	6	4	6	1	6	1	3	5	6	6
TCGA-12-1600	4	5	3	9	1	10	8	7	1	5
TCGA-12-1602	1	2	8	5	6	9	4	7	3	10
TCGA-12-3644	7	1	6	5	10	8	2	3	9	4
TCGA-12-3646	3	5	7	6	2	1	9	8	4	9
TCGA-12-3648	3	1	5	4	8	6	8	2	7	8
TCGA-12-3649	3	2	9	8	5	7	4	10	6	1
TCGA-12-3650	4	2	7	5	1	3	9	8	9	6
TCGA-12-3651	4	10	2	5	8	7	3	1	6	9
TCGA-12-3652	3	9	8	3	6	3	1	7	2	10
TCGA-12-3653	6	6	4	6	6	2	6	3	1	4
TCGA-12-5295	8	7	3	4	2	5	10	6	9	1
TCGA-12-5299	6	6	5	4	8	3	8	2	1	8
TCGA-12-5301	7	3	5	9	2	6	10	8	1	4
TCGA-13-0714	3	3	3	1	9	3	3	1	9	3
TCGA-13-0717	1	1	1	1	1	1	1	1	1	1
TCGA-13-0720	7	1	8	4	9	4	1	1	9	6
TCGA-13-0723	6	9	7	4	5	3	1	8	2	9
TCGA-13-0724	3	1	7	6	9	8	3	5	10	1
TCGA-13-0726	1	8	7	4	9	2	3	6	10	5
TCGA-13-0751	2	4	2	6	8	5	8	7	1	8
TCGA-13-0755	4	10	5	1	9	2	6	3	8	7
TCGA-13-0757	3	2	6	8	9	7	4	4	9	1
TCGA-13-0758	1	5	5	1	9	7	1	1	10	8
TCGA-13-0760	6	3	5	10	8	9	2	1	7	4
TCGA-13-0764	5	4	7	8	10	5	3	2	9	1
TCGA-13-0765	7	7	5	3	1	2	7	7	6	4
TCGA-13-0766	5	8	10	7	2	6	8	4	3	1
TCGA-13-0768	5	4	5	5	9	8	1	1	9	1
TCGA-13-0791	3	2	4	6	8	9	7	5	10	1
TCGA-13-0794	6	6	1	2	4	3	6	5	6	6
TCGA-13-0795	2	9	6	7	3	8	5	1	3	10
TCGA-13-0797	5	4	1	1	5	5	5	1	5	5
TCGA-13-0800	2	4	6	7	10	8	5	3	9	1
TCGA-13-0803	2	5	6	2	6	2	6	6	1	6
TCGA-13-0804	1	1	8	1	10	1	1	1	9	1
TCGA-13-0805	4	6	5	8	9	7	1	1	9	1
TCGA-13-0807	1	3	9	7	4	6	5	10	8	2
TCGA-13-0883	9	2	4	6	8	5	1	3	7	10
TCGA-13-0884	3	2	10	7	8	6	4	5	9	1
TCGA-13-0885	2	4	7	8	6	9	1	10	5	3
TCGA-13-0886	3	6	3	7	10	9	1	3	8	2
TCGA-13-0887	1	2	7	6	10	4	5	8	9	3
TCGA-13-0888	2	8	5	9	6	7	3	4	10	1
TCGA-13-0889	3	6	6	6	9	3	5	2	9	1
TCGA-13-0890	4	4	7	8	9	2	4	2	10	1
TCGA-13-0891	2	3	4	8	9	7	5	6	10	1
TCGA-13-0893	2	4	8	6	9	7	1	3	9	5
TCGA-13-0894	5	1	10	3	6	8	2	4	9	7
TCGA-13-0897	5	5	5	5	2	1	5	5	3	4
TCGA-13-0899	2	5	9	7	3	7	5	10	3	1
TCGA-13-0903	2	8	9	6	10	5	7	3	4	1
TCGA-13-0904	5	1	9	7	3	6	4	8	2	10
TCGA-13-0905	5	1	7	4	10	8	2	2	9	6
TCGA-13-0906	10	6	7	3	8	5	1	3	8	2
TCGA-13-0908	2	10	6	4	7	5	9	3	1	8
TCGA-13-0910	4	8	7	6	9	5	2	2	10	1
TCGA-13-0911	2	2	7	5	1	8	2	6	9	9
TCGA-13-0912	5	8	4	6	10	9	2	6	3	1
TCGA-13-0913	6	4	5	7	9	10	3	2	8	1
TCGA-13-0916	4	6	5	8	9	7	1	3	10	1
TCGA-13-0919	1	8	1	4	9	4	4	4	9	1
TCGA-13-0920	4	2	7	6	10	8	3	5	9	1
TCGA-13-0921	6	10	3	8	4	9	7	5	1	2
TCGA-13-0923	4	3	6	5	10	8	2	7	9	1
TCGA-13-0924	5	8	3	4	8	2	1	5	7	8
TCGA-13-1403	8	5	7	10	6	3	1	4	2	8
TCGA-13-1404	10	2	6	5	1	7	9	2	8	2
TCGA-13-1405	2	2	5	7	10	5	9	1	8	2
TCGA-13-1409	6	4	5	7	9	8	3	1	9	2
TCGA-13-1410	1	10	2	9	5	8	7	4	6	3
TCGA-13-1411	3	1	8	5	9	7	5	4	10	2
TCGA-13-1412	1	5	6	8	3	8	8	6	3	1
TCGA-13-1481	4	2	5	8	9	7	1	6	10	3
TCGA-13-1482	9	1	6	8	5	7	4	10	3	2
TCGA-13-1483	4	5	3	7	9	8	1	6	10	1
TCGA-13-1484	2	1	6	8	9	7	5	4	9	3
TCGA-13-1485	8	2	9	4	6	4	2	1	6	10
TCGA-13-1488	8	4	7	6	9	5	2	1	10	3
TCGA-13-1489	3	5	7	8	1	9	4	10	1	6
TCGA-13-1491	1	2	10	7	8	6	3	9	4	5
TCGA-13-1494	1	7	3	4	9	5	6	8	10	2
TCGA-13-1495	1	4	6	8	9	5	1	1	9	7
TCGA-13-1496	1	5	8	7	10	6	4	2	9	3
TCGA-13-1497	8	1	6	5	4	3	9	7	2	9
TCGA-13-1498	2	4	5	10	7	8	6	9	3	1
TCGA-13-1499	3	6	5	7	9	7	1	4	10	1
TCGA-13-1500	5	3	8	10	7	4	6	2	9	1
TCGA-13-1501	4	1	2	8	3	9	7	6	10	5
TCGA-13-1504	6	1	1	7	9	8	1	1	10	1
TCGA-13-1506	1	1	1	1	9	1	1	1	1	10
TCGA-13-1507	3	10	2	6	5	7	8	1	4	9
TCGA-13-1509	2	5	6	7	10	9	3	3	8	1
TCGA-13-1511	1	8	1	1	9	1	1	1	9	1
TCGA-13-1512	6	1	9	10	4	8	7	3	4	1
TCGA-13-2057	5	3	6	8	9	7	2	4	10	1
TCGA-13-2059	4	5	2	8	10	6	3	7	9	1
TCGA-13-2060	1	7	3	6	10	8	2	5	9	4
TCGA-13-2061	9	3	8	6	7	5	2	4	10	1
TCGA-13-2065	1	9	6	4	1	3	7	8	5	10
TCGA-13-2071	7	8	5	4	3	2	6	1	9	10
TCGA-13-A5FT	1	2	5	7	9	3	6	3	8	10
TCGA-13-A5FU	2	4	6	8	10	9	2	5	7	1
TCGA-14-0736	6	1	2	4	6	3	5	6	6	6
TCGA-14-0740	7	3	7	5	9	5	1	4	9	1
TCGA-14-0781	7	5	1	1	9	1	7	5	9	4
TCGA-14-0786	1	4	1	5	7	6	8	1	8	8
TCGA-14-0787	5	4	5	1	2	5	5	5	3	5
TCGA-14-0789	8	9	7	4	2	4	1	6	3	10
TCGA-14-0790	8	1	7	5	4	3	9	2	6	10
TCGA-14-0812	1	8	5	4	6	7	3	9	2	10
TCGA-14-0813	6	7	9	8	3	10	2	5	1	4
TCGA-14-0817	7	4	7	1	2	3	7	6	5	7
TCGA-14-0862	1	9	3	2	7	4	5	5	7	10
TCGA-14-0865	2	1	6	4	9	3	9	5	7	8
TCGA-14-0866	7	4	6	5	10	3	2	1	9	8
TCGA-14-0867	10	2	9	7	5	6	8	4	1	3
TCGA-14-0871	7	8	4	5	2	3	6	1	8	8
TCGA-14-1034	8	5	7	3	9	3	2	6	9	1
TCGA-14-1037	9	2	4	6	3	7	1	9	8	5
TCGA-14-1043	6	1	3	2	7	4	7	4	7	7
TCGA-14-1395	1	1	1	1	8	1	8	1	8	7
TCGA-14-1396	7	1	8	6	10	9	3	4	5	2
TCGA-14-1450	9	4	1	3	6	2	9	5	8	7
TCGA-14-1451	8	5	1	4	3	1	8	7	8	6
TCGA-14-1453	4	9	8	7	4	3	1	1	4	10
TCGA-14-1455	5	8	8	3	1	5	4	5	1	10
TCGA-14-1456	3	10	3	7	8	3	2	3	8	1
TCGA-14-1458	6	7	2	4	8	5	1	9	3	10
TCGA-14-1794	6	1	3	7	10	4	8	5	9	2
TCGA-14-1795	5	9	7	8	2	1	3	6	4	10
TCGA-14-1821	4	9	4	4	10	4	2	8	1	2
TCGA-14-1823	7	2	4	6	10	9	3	8	4	1
TCGA-14-1825	1	8	1	7	9	1	1	1	9	1
TCGA-14-1827	1	3	6	4	7	5	9	2	8	10
TCGA-14-1829	1	7	6	1	4	1	7	7	4	7
TCGA-14-2554	6	7	3	2	9	5	9	1	8	4
TCGA-14-3476	6	1	2	3	5	3	9	7	7	9
TCGA-14-3477	2	3	8	7	10	6	5	4	9	1
TCGA-14-4157	1	5	1	1	6	1	6	6	6	6
TCGA-15-0742	4	1	5	6	7	8	9	3	2	9
TCGA-15-1446	2	10	8	6	5	7	1	9	3	4
TCGA-16-0846	8	1	6	6	10	1	5	1	9	1
TCGA-16-0848	2	7	4	9	6	10	1	3	8	5
TCGA-16-0849	6	2	5	8	9	7	1	3	10	4
TCGA-16-0850	7	4	8	6	9	3	1	2	10	5
TCGA-16-0861	9	7	6	5	8	4	1	2	3	9
TCGA-16-1045	2	1	5	6	8	7	10	3	9	4
TCGA-16-1460	5	2	6	8	10	7	3	4	9	1
TCGA-18-3406	7	8	10	9	3	5	1	4	6	1
TCGA-18-3407	1	2	7	9	3	8	5	6	3	10
TCGA-18-3408	2	1	8	5	10	9	3	5	7	4
TCGA-18-3409	2	9	7	5	8	3	1	4	10	6
TCGA-18-3410	2	1	8	6	9	5	7	4	10	3
TCGA-18-3411	9	1	4	2	8	3	10	5	7	6
TCGA-18-3412	2	8	9	4	5	3	7	6	1	10
TCGA-18-3414	4	6	8	10	5	9	1	2	3	7
TCGA-18-3415	6	8	7	10	5	9	3	2	1	3
TCGA-18-3416	10	1	4	9	2	7	6	8	5	3
TCGA-18-3417	10	7	5	8	9	6	3	1	4	2
TCGA-18-3419	10	7	4	9	3	6	1	5	2	8
TCGA-18-3421	4	6	8	7	10	9	1	3	5	2
TCGA-18-4083	4	2	8	6	5	9	7	3	10	1
TCGA-18-4086	5	2	6	1	8	3	9	4	7	9
TCGA-18-4721	1	8	5	7	4	9	6	2	3	10
TCGA-18-5592	4	5	7	6	10	8	1	3	9	2
TCGA-18-5595	5	8	6	2	3	1	7	4	9	10
TCGA-19-0957	10	2	7	5	8	6	4	3	9	1
TCGA-19-1385	2	5	4	6	7	3	8	1	9	10
TCGA-19-1386	2	1	4	6	5	3	7	9	8	10
TCGA-19-1387	8	2	3	5	7	6	9	4	10	1
TCGA-19-1388	10	6	9	8	4	5	7	3	2	1
TCGA-19-1389	9	1	6	4	2	5	8	7	3	10
TCGA-19-1390	5	3	4	9	10	1	5	5	2	5
TCGA-19-1786	1	9	6	2	8	4	3	5	7	10
TCGA-19-1787	2	10	6	5	8	7	4	3	9	1
TCGA-19-1788	3	1	4	2	6	5	7	8	10	9
TCGA-19-1789	1	4	2	5	9	7	6	3	8	10
TCGA-19-1790	8	3	1	4	6	5	7	2	9	10
TCGA-19-1791	1	10	5	2	6	3	7	4	8	9
TCGA-19-2619	10	2	9	8	6	5	1	6	4	3
TCGA-19-2620	7	9	8	5	2	6	1	4	2	10
TCGA-19-2621	4	3	7	5	8	6	9	2	10	1
TCGA-19-2623	8	7	4	5	9	3	1	6	10	1
TCGA-19-2624	7	9	5	7	1	4	3	6	1	10
TCGA-19-2625	9	2	3	5	8	4	6	7	10	1
TCGA-19-2629	8	5	2	2	10	7	9	2	1	6
TCGA-19-2631	6	8	2	4	9	5	7	3	1	10
TCGA-19-4065	7	4	3	5	9	6	2	7	9	1
TCGA-19-4068	8	4	7	3	6	1	1	9	4	10
TCGA-19-5947	1	7	7	1	1	1	1	1	9	10
TCGA-19-5950	3	1	5	8	6	8	10	7	4	1
TCGA-19-5951	1	4	3	8	6	7	10	2	9	5
TCGA-19-5952	5	7	6	4	9	1	9	1	8	1
TCGA-19-5953	7	2	5	4	7	3	7	1	7	6
TCGA-19-5954	3	1	4	5	9	8	2	7	6	10
TCGA-19-5955	3	3	3	1	8	7	3	1	8	10
TCGA-19-5956	7	9	6	4	8	3	2	5	10	1
TCGA-19-5958	8	6	4	3	7	2	1	5	8	10
TCGA-19-5959	7	8	6	4	2	3	8	8	1	5
TCGA-19-5960	2	7	5	8	1	9	6	4	3	10
TCGA-19-A60I	5	5	5	3	1	3	5	5	1	5
TCGA-19-A6J4	1	3	5	4	8	6	1	7	9	10
TCGA-19-A6J5	5	7	2	6	9	8	4	3	9	1
TCGA-20-0987	3	1	8	7	9	6	5	4	10	1
TCGA-20-0990	6	1	4	9	7	8	2	5	10	3
TCGA-20-0996	1	1	8	8	1	7	1	1	6	10
TCGA-20-1682	7	5	6	9	8	4	3	2	10	1
TCGA-20-1683	4	2	6	8	9	7	5	3	9	1
TCGA-20-1684	6	2	4	6	5	6	6	6	3	1
TCGA-20-1685	2	2	5	9	10	6	2	8	7	1
TCGA-20-1686	4	5	10	8	6	9	1	3	6	1
TCGA-20-1687	2	5	6	4	9	7	1	3	9	8
TCGA-21-1070	1	7	3	5	8	4	10	2	6	9
TCGA-21-1071	9	3	8	2	5	7	4	1	6	10
TCGA-21-1075	8	1	4	7	3	6	2	10	5	9
TCGA-21-1076	1	3	2	5	9	6	4	8	10	7
TCGA-21-1077	5	9	6	7	4	3	1	8	2	10
TCGA-21-1078	7	1	2	5	10	4	9	3	6	8
TCGA-21-1079	7	8	9	5	2	4	1	10	6	3
TCGA-21-1080	9	3	7	5	8	6	1	4	10	2
TCGA-21-1081	9	3	7	8	5	2	6	1	10	4
TCGA-21-1082	2	3	8	6	9	5	4	7	10	1
TCGA-21-1083	8	1	7	6	4	5	10	9	2	3
TCGA-21-5782	10	6	8	4	7	5	1	2	3	9
TCGA-21-5783	1	9	7	6	2	3	5	4	8	10
TCGA-21-5784	6	5	8	9	10	7	1	3	4	2
TCGA-21-5786	3	10	8	6	7	5	2	9	4	1
TCGA-21-5787	2	10	5	4	8	3	6	7	9	1
TCGA-21-A5DI	3	6	5	4	8	2	9	1	9	7
TCGA-22-0940	4	9	6	7	3	5	1	2	8	10
TCGA-22-0944	8	4	5	6	9	7	2	3	10	1
TCGA-22-1000	6	1	1	7	9	8	1	5	10	1
TCGA-22-1002	7	9	2	6	1	3	4	8	5	10
TCGA-22-1005	10	1	8	7	2	4	9	6	3	5
TCGA-22-1011	6	9	5	3	2	4	1	8	7	9
TCGA-22-1012	3	1	7	6	9	4	5	10	8	2
TCGA-22-1016	8	6	9	4	7	5	1	2	3	10
TCGA-22-4591	7	4	5	3	6	1	9	8	2	10
TCGA-22-4593	7	8	4	2	6	3	9	1	5	9
TCGA-22-4594	5	8	4	6	9	7	10	3	2	1
TCGA-22-4595	7	8	4	6	3	5	9	2	1	10
TCGA-22-4596	2	9	8	4	3	7	5	5	1	10
TCGA-22-4599	9	5	4	3	2	1	10	8	6	7
TCGA-22-4601	4	1	5	8	2	10	3	6	9	7
TCGA-22-4604	2	7	9	5	8	3	6	4	10	1
TCGA-22-4605	7	9	4	6	8	5	2	1	10	2
TCGA-22-4607	3	3	7	8	10	9	3	3	2	1
TCGA-22-4609	2	1	3	8	4	5	7	6	9	10
TCGA-22-4613	2	10	6	5	7	4	1	3	9	8
TCGA-22-5471	2	4	6	7	10	8	1	5	9	3
TCGA-22-5472	9	3	5	6	10	8	4	2	7	1
TCGA-22-5473	2	4	3	6	7	5	10	9	8	1
TCGA-22-5474	6	4	5	8	9	7	2	3	10	1
TCGA-22-5477	2	6	8	5	3	9	7	4	10	1
TCGA-22-5478	7	6	8	10	2	9	1	5	3	4
TCGA-22-5479	4	1	3	7	9	10	5	2	6	8
TCGA-22-5480	4	6	8	5	7	9	1	2	10	3
TCGA-22-5481	5	1	6	8	4	9	2	7	10	3
TCGA-22-5482	2	4	6	5	9	7	1	3	8	10
TCGA-22-5483	2	1	8	10	6	9	3	4	7	5
TCGA-22-5485	10	2	3	9	6	7	1	5	4	8
TCGA-22-5489	7	9	2	4	10	6	3	1	8	5
TCGA-22-5491	2	3	5	6	10	9	4	7	8	1
TCGA-22-5492	9	10	7	4	8	2	1	3	6	5
TCGA-22-A5C4	1	6	2	3	9	4	8	5	7	10
TCGA-23-1021	2	3	5	6	10	7	8	9	4	1
TCGA-23-1022	4	2	8	7	9	6	3	5	10	1
TCGA-23-1027	10	9	4	5	8	6	1	3	7	1
TCGA-23-1029	1	4	6	8	9	7	1	1	10	5
TCGA-23-1030	3	5	6	7	10	7	1	2	9	4
TCGA-23-1031	1	8	2	4	3	6	10	7	5	9
TCGA-23-1032	1	2	6	7	9	8	5	4	10	3
TCGA-23-1111	1	1	8	7	9	6	1	5	10	1
TCGA-23-1113	3	2	4	8	5	10	7	9	5	1
TCGA-23-1114	1	4	7	6	9	8	1	1	10	5
TCGA-23-1116	1	6	4	2	8	3	7	5	9	10
TCGA-23-1117	2	9	7	4	6	3	5	1	8	10
TCGA-23-1118	1	10	8	7	5	4	3	2	9	6
TCGA-23-1121	6	7	5	4	9	8	3	2	10	1
TCGA-23-1122	5	4	10	6	9	8	2	3	7	1
TCGA-23-1123	3	9	8	7	6	4	5	2	10	1
TCGA-23-1124	2	3	4	8	6	9	5	7	10	1
TCGA-23-1809	9	1	1	5	8	4	3	5	9	7
TCGA-23-2072	1	6	8	7	10	5	3	4	9	1
TCGA-23-2077	5	3	6	8	10	7	2	4	9	1
TCGA-23-2078	9	10	7	5	4	2	8	3	6	1
TCGA-23-2079	7	1	4	2	5	3	6	7	7	7
TCGA-23-2081	5	3	6	9	10	7	2	4	8	1
TCGA-23-2084	3	1	6	4	9	10	7	8	5	2
TCGA-23-2641	1	1	7	6	8	5	1	10	9	1
TCGA-23-2643	6	4	8	5	10	6	1	1	9	3
TCGA-23-2645	7	1	9	4	3	5	2	8	6	10
TCGA-23-2647	6	4	8	2	5	1	9	7	9	3
TCGA-23-2649	6	3	4	8	10	5	1	7	9	2
TCGA-24-0966	1	3	7	8	9	6	3	5	9	1
TCGA-24-0970	1	1	6	7	9	7	4	5	10	1
TCGA-24-0975	9	5	1	7	2	6	4	3	8	10
TCGA-24-0979	5	4	8	6	10	7	1	3	9	2
TCGA-24-0980	1	3	8	9	7	10	1	5	4	6
TCGA-24-0982	6	4	9	10	8	5	1	3	7	1
TCGA-24-1103	7	2	8	6	9	5	2	4	9	1
TCGA-24-1104	2	4	9	5	7	6	1	8	10	3
TCGA-24-1413	6	3	9	10	4	7	1	1	8	5
TCGA-24-1416	1	1	1	1	9	1	1	1	9	8
TCGA-24-1417	3	6	8	9	1	10	2	5	4	6
TCGA-24-1418	1	6	5	2	6	3	6	6	6	4
TCGA-24-1419	1	1	8	9	5	6	1	7	10	1
TCGA-24-1422	2	5	7	8	10	6	3	4	9	1
TCGA-24-1423	4	1	7	5	8	6	10	9	3	2
TCGA-24-1424	2	1	6	5	9	8	3	4	10	7
TCGA-24-1425	1	7	5	10	9	8	1	6	3	4
TCGA-24-1426	2	6	8	7	10	4	1	5	9	3
TCGA-24-1427	5	1	8	8	3	6	10	7	1	4
TCGA-24-1428	5	2	6	9	10	7	2	1	8	2
TCGA-24-1430	3	3	3	2	3	3	3	3	1	3
TCGA-24-1434	3	8	3	1	5	6	8	7	2	8
TCGA-24-1435	3	9	4	2	8	5	1	7	10	6
TCGA-24-1436	1	1	6	5	10	7	1	4	9	8
TCGA-24-1463	6	5	10	8	9	7	2	3	4	1
TCGA-24-1464	1	1	6	1	9	8	1	1	10	7
TCGA-24-1466	1	2	7	8	9	6	4	4	10	3
TCGA-24-1467	1	8	1	6	9	6	1	1	9	1
TCGA-24-1469	3	4	8	10	9	7	1	5	6	2
TCGA-24-1470	8	2	5	1	6	4	8	3	6	8
TCGA-24-1471	1	5	8	9	10	6	3	4	7	1
TCGA-24-1474	3	6	7	8	10	5	1	3	9	2
TCGA-24-1550	8	5	4	7	9	6	3	2	9	1
TCGA-24-1551	4	3	5	6	9	8	2	7	10	1
TCGA-24-1552	3	4	2	6	9	6	5	8	10	1
TCGA-24-1562	2	5	4	5	10	5	5	2	9	1
TCGA-24-1564	1	3	3	7	9	8	1	3	9	6
TCGA-24-1565	2	6	6	6	1	4	3	9	5	10
TCGA-24-1603	9	4	1	8	2	3	10	7	5	6
TCGA-24-1616	1	3	4	5	9	8	5	5	10	1
TCGA-24-1842	1	6	7	8	9	4	1	4	9	1
TCGA-24-1843	4	7	9	8	6	5	3	1	10	1
TCGA-24-1844	4	1	7	9	10	5	2	6	8	3
TCGA-24-1845	3	8	4	6	9	7	2	5	10	1
TCGA-24-1846	7	9	4	3	8	5	1	2	6	10
TCGA-24-1847	2	7	4	5	10	8	2	1	9	6
TCGA-24-1849	1	8	7	5	4	10	1	6	9	1
TCGA-24-1850	5	7	8	3	10	6	2	4	9	1
TCGA-24-1927	7	10	9	4	6	2	8	3	5	1
TCGA-24-2019	2	3	8	7	9	4	5	6	10	1
TCGA-24-2024	8	9	6	5	7	4	2	3	10	1
TCGA-24-2030	3	2	6	9	10	8	7	4	5	1
TCGA-24-2033	4	8	9	7	6	5	1	3	10	1
TCGA-24-2035	3	2	6	5	8	4	9	1	7	10
TCGA-24-2036	8	7	10	6	3	8	1	1	3	5
TCGA-24-2038	1	9	1	7	1	7	1	1	1	10
TCGA-24-2254	3	8	4	7	10	6	5	2	9	1
TCGA-24-2260	1	4	5	7	10	8	1	6	9	1
TCGA-24-2261	6	3	3	5	9	8	1	1	10	7
TCGA-24-2262	7	4	8	5	10	6	3	1	9	2
TCGA-24-2267	3	7	4	5	9	6	1	2	10	8
TCGA-24-2271	6	5	3	7	10	8	2	4	9	1
TCGA-24-2280	5	2	7	8	10	4	1	6	9	3
TCGA-24-2281	7	4	9	10	6	8	1	5	2	3
TCGA-24-2288	1	8	7	6	9	4	2	5	10	3
TCGA-24-2289	2	6	8	4	9	5	3	10	7	1
TCGA-24-2290	3	6	4	8	2	10	6	1	9	5
TCGA-24-2293	1	8	6	5	2	7	10	4	3	9
TCGA-24-2295	2	4	6	7	10	8	3	5	9	1
TCGA-24-2298	6	9	4	3	5	1	7	8	2	10
TCGA-25-1312	2	1	2	2	2	2	2	2	2	2
TCGA-25-1313	1	10	3	9	5	7	8	2	6	4
TCGA-25-1314	7	1	2	4	3	6	8	9	5	9
TCGA-25-1315	5	6	8	7	9	2	4	1	9	3
TCGA-25-1316	1	1	1	1	1	1	1	1	9	10
TCGA-25-1319	2	6	7	8	9	2	2	2	9	1
TCGA-25-1320	2	4	5	3	7	6	10	9	8	1
TCGA-25-1321	3	3	3	2	9	1	3	3	9	3
TCGA-25-1323	5	3	7	6	10	8	4	2	9	1
TCGA-25-1329	3	2	4	5	9	7	6	1	8	10
TCGA-25-2042	3	2	5	7	4	9	8	6	1	10
TCGA-25-2391	2	1	3	4	8	5	7	6	8	10
TCGA-25-2392	6	8	7	3	9	5	4	2	10	1
TCGA-25-2393	4	6	1	8	2	5	6	10	2	9
TCGA-25-2396	1	1	9	6	8	1	6	1	10	1
TCGA-25-2397	1	9	6	7	10	5	4	3	8	1
TCGA-25-2398	1	4	2	3	6	5	6	6	6	6
TCGA-25-2399	10	9	6	4	2	5	1	8	7	3
TCGA-25-2400	3	5	7	8	9	6	2	4	10	1
TCGA-25-2401	1	1	7	5	10	8	4	6	9	3
TCGA-25-2404	3	4	6	8	9	7	1	5	10	1
TCGA-25-2408	7	1	1	1	6	5	7	1	7	7
TCGA-25-2409	4	9	6	7	5	8	1	1	10	1
TCGA-26-1439	4	1	6	5	7	1	7	1	7	7
TCGA-26-1442	1	3	6	8	9	6	4	4	9	1
TCGA-26-1799	2	10	5	7	2	6	9	4	1	8
TCGA-26-5132	6	5	9	8	2	6	2	2	10	1
TCGA-26-5133	5	8	5	7	9	4	1	1	10	3
TCGA-26-5134	4	8	7	2	4	1	4	10	3	8
TCGA-26-5135	6	3	1	6	4	5	6	6	2	6
TCGA-26-5136	2	2	7	7	9	6	2	2	10	1
TCGA-26-5139	4	1	4	1	8	6	8	1	7	8
TCGA-26-6173	9	2	8	5	7	6	2	2	1	9
TCGA-26-6174	8	4	5	7	9	6	10	1	3	2
TCGA-26-A7UX	6	9	6	5	1	4	9	6	3	2
TCGA-27-1830	2	2	8	7	9	5	1	2	10	6
TCGA-27-1831	1	6	2	3	4	5	10	8	7	9
TCGA-27-1832	9	4	6	1	5	3	1	8	6	9
TCGA-27-1833	3	1	3	2	8	6	9	7	5	9
TCGA-27-1834	7	1	2	3	9	6	5	4	9	8
TCGA-27-1835	4	2	9	7	8	6	3	5	10	1
TCGA-27-1836	8	9	4	1	7	3	9	2	6	5
TCGA-27-1837	8	1	4	6	8	4	7	1	8	3
TCGA-27-1838	7	2	4	6	9	5	8	1	10	3
TCGA-27-2518	9	6	1	4	2	3	6	4	9	6
TCGA-27-2519	9	1	7	2	9	7	5	2	6	2
TCGA-27-2521	10	2	4	3	8	6	5	7	9	1
TCGA-27-2523	7	7	5	4	3	6	7	1	2	7
TCGA-27-2524	7	1	6	4	9	4	8	3	9	1
TCGA-27-2526	7	1	1	1	7	1	7	1	7	1
TCGA-27-2527	4	6	4	2	7	3	8	8	10	1
TCGA-27-2528	1	1	4	5	7	5	9	3	7	10
TCGA-28-1745	8	4	5	3	9	6	10	7	2	1
TCGA-28-1746	10	2	6	5	7	8	4	3	9	1
TCGA-28-1747	6	7	2	3	8	3	1	3	8	8
TCGA-28-1749	4	2	6	6	1	3	8	4	8	8
TCGA-28-1750	10	2	5	6	8	7	1	4	9	3
TCGA-28-1751	2	1	3	6	8	4	9	7	5	10
TCGA-28-1752	4	5	6	2	8	3	7	1	9	10
TCGA-28-1753	8	10	7	5	4	2	9	6	1	3
TCGA-28-1755	10	7	2	4	9	5	6	8	1	3
TCGA-28-1757	2	1	7	8	10	9	5	4	6	3
TCGA-28-1760	3	1	4	6	8	5	10	9	7	2
TCGA-28-2502	8	3	2	6	1	5	10	3	9	7
TCGA-28-2506	4	3	9	5	7	8	2	1	10	6
TCGA-28-2509	3	3	3	6	9	6	1	8	9	1
TCGA-28-2513	9	3	1	2	7	4	5	6	7	10
TCGA-28-2514	7	1	5	6	8	1	1	1	8	8
TCGA-28-5204	3	1	1	3	3	3	3	3	3	10
TCGA-28-5207	3	2	10	9	8	7	5	4	6	1
TCGA-28-5208	3	9	2	8	5	7	3	6	1	9
TCGA-28-5209	6	5	3	2	1	4	9	7	8	9
TCGA-28-5211	6	3	7	8	4	9	1	1	4	10
TCGA-28-5213	6	7	5	4	2	3	9	1	8	9
TCGA-28-5214	7	8	2	2	8	2	2	2	8	1
TCGA-28-5215	4	4	2	4	2	1	4	4	4	4
TCGA-28-5216	8	2	7	4	9	4	1	4	9	2
TCGA-28-5218	2	2	2	2	1	2	2	2	2	2
TCGA-28-5219	1	1	7	8	9	1	1	1	9	6
TCGA-28-5220	3	3	6	6	1	6	9	3	1	9
TCGA-28-6450	8	9	7	5	1	2	3	4	6	10
TCGA-29-1688	5	7	4	6	10	8	1	1	9	1
TCGA-29-1691	4	10	6	8	1	3	5	7	2	9
TCGA-29-1693	9	6	5	7	3	8	10	4	1	2
TCGA-29-1694	8	8	2	6	4	5	8	7	3	1
TCGA-29-1695	7	8	6	4	9	1	1	4	10	1
TCGA-29-1696	6	1	9	8	2	3	6	4	5	10
TCGA-29-1697	2	6	10	8	3	8	5	7	3	1
TCGA-29-1698	5	1	8	6	9	7	1	3	9	4
TCGA-29-1699	2	8	6	7	10	9	3	4	5	1
TCGA-29-1701	2	5	1	8	9	7	4	6	10	3
TCGA-29-1702	6	2	8	5	9	7	3	4	10	1
TCGA-29-1703	4	6	8	7	10	5	2	2	9	1
TCGA-29-1705	1	2	7	8	10	6	2	4	9	5
TCGA-29-1707	1	4	6	5	9	7	2	2	10	8
TCGA-29-1710	6	1	4	7	10	8	5	3	9	1
TCGA-29-1711	1	8	5	6	9	4	3	7	9	1
TCGA-29-1761	9	1	2	5	4	3	8	6	7	10
TCGA-29-1762	2	6	9	7	10	8	3	4	5	1
TCGA-29-1763	8	4	9	6	5	10	2	3	7	1
TCGA-29-1764	5	1	4	9	10	5	7	2	8	3
TCGA-29-1766	6	4	7	9	3	8	1	2	5	10
TCGA-29-1768	1	4	5	8	9	6	1	7	9	1
TCGA-29-1769	3	1	7	4	2	5	8	9	6	10
TCGA-29-1770	1	5	10	6	9	8	4	2	7	3
TCGA-29-1771	5	2	5	10	3	4	5	5	1	5
TCGA-29-1774	1	1	7	9	8	9	5	6	4	1
TCGA-29-1775	1	5	8	7	10	6	3	2	9	4
TCGA-29-1776	2	8	7	5	9	6	1	4	10	2
TCGA-29-1777	4	10	7	5	9	3	1	2	8	6
TCGA-29-1778	5	3	6	7	9	8	1	4	10	1
TCGA-29-1781	8	10	9	5	4	7	1	6	3	2
TCGA-29-1783	2	6	5	1	3	4	8	9	7	9
TCGA-29-1784	5	6	8	7	9	4	1	3	10	2
TCGA-29-1785	2	8	1	6	10	7	2	2	9	2
TCGA-29-2427	3	5	7	6	9	4	2	1	9	8
TCGA-29-2429	9	2	5	4	7	6	9	1	8	2
TCGA-29-2431	2	7	5	1	4	3	7	7	6	7
TCGA-29-2432	4	1	5	7	8	6	2	2	9	10
TCGA-29-2434	2	1	9	5	6	7	3	4	10	8
TCGA-29-2436	1	1	1	1	1	1	1	1	1	1
TCGA-29-A5NZ	3	5	7	8	9	6	1	3	10	2
TCGA-2A-A8VL	1	3	2	5	6	4	6	6	6	6
TCGA-2A-A8VO	5	8	1	4	6	3	8	2	6	8
TCGA-2A-A8VT	4	1	6	3	9	7	8	1	5	10
TCGA-2A-A8VV	2	2	1	2	2	2	2	2	2	2
TCGA-2A-A8VX	1	6	1	6	1	5	6	6	1	6
TCGA-2A-A8W1	1	1	1	1	1	1	1	1	1	1
TCGA-2A-A8W3	5	6	3	3	6	2	6	6	1	6
TCGA-2A-AAYF	4	4	1	2	4	3	4	4	4	4
TCGA-2A-AAYO	4	4	1	4	1	3	4	4	4	4
TCGA-2A-AAYU	5	5	4	2	5	5	5	5	1	3
TCGA-2E-A9G8	5	1	3	4	8	2	9	6	7	9
TCGA-2F-A9KO	9	3	7	6	1	5	10	8	2	4
TCGA-2F-A9KP	1	2	7	5	9	4	6	3	8	10
TCGA-2F-A9KQ	2	9	1	4	7	3	5	6	7	10
TCGA-2F-A9KR	10	5	6	7	9	4	2	2	8	1
TCGA-2F-A9KT	5	10	8	2	7	6	3	1	4	9
TCGA-2F-A9KW	9	1	7	5	8	10	2	3	4	6
TCGA-2G-AAEW	1	1	1	1	1	1	1	1	1	10
TCGA-2G-AAEX	5	3	2	4	5	1	5	5	9	10
TCGA-2G-AAF1	1	1	1	4	7	4	9	4	7	9
TCGA-2G-AAF4	1	1	1	1	1	1	1	1	9	10
TCGA-2G-AAF6	1	1	1	1	1	1	1	1	1	10
TCGA-2G-AAF8	1	1	1	1	1	1	1	1	1	1
TCGA-2G-AAFE	2	5	4	2	8	6	9	1	10	7
TCGA-2G-AAFG	3	1	3	2	7	3	7	7	6	7
TCGA-2G-AAFH	2	2	1	2	2	2	2	2	2	2
TCGA-2G-AAFI	5	5	5	1	4	3	1	5	5	5
TCGA-2G-AAFJ	3	1	3	3	3	1	9	3	3	9
TCGA-2G-AAFL	2	2	2	2	2	2	2	2	2	1
TCGA-2G-AAFM	5	5	4	5	2	3	5	5	1	5
TCGA-2G-AAFN	2	2	2	2	2	2	2	2	2	1
TCGA-2G-AAFO	1	1	1	1	1	1	1	1	1	1
TCGA-2G-AAFV	4	4	4	4	1	1	4	4	3	4
TCGA-2G-AAFY	1	1	1	1	1	1	1	1	1	1
TCGA-2G-AAFZ	5	5	5	1	1	1	1	5	5	5
TCGA-2G-AAG0	3	2	3	1	3	3	3	3	3	3
TCGA-2G-AAG3	2	2	2	2	2	2	1	2	2	2
TCGA-2G-AAG5	1	1	1	1	1	1	1	1	1	1
TCGA-2G-AAG6	1	7	1	1	1	1	7	1	7	7
TCGA-2G-AAG7	3	5	3	1	5	5	5	1	5	5
TCGA-2G-AAG8	2	2	1	2	2	2	2	2	2	2
TCGA-2G-AAG9	5	9	4	5	2	5	1	5	2	10
TCGA-2G-AAGA	7	7	5	2	5	4	1	2	7	7
TCGA-2G-AAGC	1	6	3	3	6	6	6	5	1	6
TCGA-2G-AAGE	3	7	3	6	3	1	7	1	7	7
TCGA-2G-AAGF	4	1	3	4	4	4	4	1	4	10
TCGA-2G-AAGG	4	4	4	4	3	1	4	4	2	4
TCGA-2G-AAGI	4	7	6	4	9	8	1	1	9	3
TCGA-2G-AAGJ	4	1	1	1	4	4	4	4	4	4
TCGA-2G-AAGK	1	7	1	1	7	1	1	7	1	7
TCGA-2G-AAGM	3	3	1	2	3	3	3	3	3	3
TCGA-2G-AAGN	1	1	1	1	1	1	1	1	1	1
TCGA-2G-AAGO	1	6	1	1	7	1	7	7	1	7
TCGA-2G-AAGP	6	2	3	3	1	5	6	6	6	6
TCGA-2G-AAGS	2	2	2	1	2	2	2	2	2	2
TCGA-2G-AAGT	3	3	1	3	1	3	3	3	3	3
TCGA-2G-AAGV	1	1	1	1	1	1	1	1	1	1
TCGA-2G-AAGW	3	5	5	2	5	3	5	1	5	5
TCGA-2G-AAGX	5	5	5	1	1	1	1	5	5	5
TCGA-2G-AAGY	3	3	3	3	1	1	3	3	3	3
TCGA-2G-AAGZ	9	6	6	3	1	3	6	3	1	9
TCGA-2G-AAH0	1	1	1	1	1	1	1	1	1	1
TCGA-2G-AAH2	5	5	3	1	5	4	2	5	5	5
TCGA-2G-AAH3	1	1	5	1	6	8	9	1	6	9
TCGA-2G-AAH4	1	1	1	1	1	1	1	1	1	1
TCGA-2G-AAH8	2	8	1	8	2	2	2	2	2	10
TCGA-2G-AAHA	1	1	1	1	8	7	6	1	8	10
TCGA-2G-AAHC	1	1	1	1	1	1	1	1	1	1
TCGA-2G-AAHG	6	1	2	2	6	2	6	2	6	6
TCGA-2G-AAHL	1	4	4	3	7	6	7	1	7	7
TCGA-2G-AAHN	1	1	5	5	8	1	8	1	7	8
TCGA-2G-AAHP	4	4	4	1	4	1	4	3	4	4
TCGA-2G-AAHT	1	1	1	1	7	1	7	1	7	7
TCGA-2G-AAKD	2	6	3	3	6	5	6	6	6	1
TCGA-2G-AAKG	2	2	2	2	2	1	2	2	2	2
TCGA-2G-AAKH	8	1	7	4	5	3	6	2	8	8
TCGA-2G-AAKL	1	1	1	1	1	1	1	1	1	1
TCGA-2G-AAKM	2	2	2	2	2	1	2	2	2	2
TCGA-2G-AAL5	1	6	4	1	4	1	6	6	6	6
TCGA-2G-AAL7	3	3	3	1	3	3	3	1	3	3
TCGA-2G-AALP	6	8	2	4	8	4	1	3	7	8
TCGA-2H-A9GF	7	8	5	6	9	3	4	2	1	10
TCGA-2H-A9GH	3	2	9	5	10	6	1	4	8	7
TCGA-2H-A9GI	4	10	2	5	3	7	9	8	6	1
TCGA-2H-A9GJ	3	7	9	6	10	8	2	5	4	1
TCGA-2H-A9GK	10	4	8	6	9	5	7	2	3	1
TCGA-2H-A9GL	9	8	5	4	7	6	1	3	2	10
TCGA-2H-A9GM	5	10	2	3	1	4	5	7	9	8
TCGA-2H-A9GN	6	1	7	4	9	3	2	5	8	10
TCGA-2H-A9GO	7	8	6	3	9	4	2	5	10	1
TCGA-2H-A9GQ	2	3	4	8	10	9	6	5	1	7
TCGA-2H-A9GR	4	9	8	5	2	3	7	1	6	10
TCGA-2J-AAB1	6	6	3	2	8	1	4	5	8	10
TCGA-2J-AAB4	3	3	2	3	9	8	3	3	10	1
TCGA-2J-AAB6	1	1	10	6	8	7	1	9	5	4
TCGA-2J-AAB8	2	6	5	4	10	8	6	3	9	1
TCGA-2J-AAB9	3	3	3	8	9	2	3	7	9	1
TCGA-2J-AABA	7	1	1	1	7	1	1	6	7	7
TCGA-2J-AABE	2	2	2	1	2	2	2	2	2	10
TCGA-2J-AABF	4	2	7	5	9	5	8	3	9	1
TCGA-2J-AABH	3	7	8	6	1	2	3	9	5	10
TCGA-2J-AABI	1	1	9	6	4	6	1	6	4	10
TCGA-2J-AABK	3	2	4	5	6	9	7	7	10	1
TCGA-2J-AABO	6	5	7	10	4	8	2	3	9	1
TCGA-2J-AABP	3	1	10	8	6	9	7	4	5	1
TCGA-2J-AABR	3	2	6	6	9	3	3	6	9	1
TCGA-2J-AABT	1	4	4	4	2	4	8	8	2	10
TCGA-2J-AABV	1	6	6	1	10	1	1	6	5	9
TCGA-2K-A9WE	4	6	3	1	6	2	6	4	6	6
TCGA-2L-AAQA	2	5	6	8	4	1	3	7	9	10
TCGA-2L-AAQE	3	3	6	6	10	9	3	6	2	1
TCGA-2L-AAQI	2	2	8	6	9	7	2	5	10	1
TCGA-2L-AAQJ	7	10	6	2	4	3	7	5	9	1
TCGA-2L-AAQL	5	6	3	7	9	8	4	2	10	1
TCGA-2L-AAQM	5	5	2	2	5	2	1	5	5	5
TCGA-2V-A95S	7	9	5	3	4	6	1	7	2	10
TCGA-2W-A8YY	6	10	4	3	8	9	2	5	7	1
TCGA-2X-A9D5	1	1	1	7	8	1	8	1	6	8
TCGA-2X-A9D6	1	5	1	5	7	1	7	1	7	7
TCGA-2Y-A9GS	3	1	7	8	9	6	3	3	9	1
TCGA-2Y-A9GT	8	8	4	1	6	3	8	5	2	7
TCGA-2Y-A9GU	10	1	2	4	3	7	8	5	9	6
TCGA-2Y-A9GV	2	9	8	4	1	4	10	4	3	7
TCGA-2Y-A9GW	6	10	5	1	3	2	6	8	4	9
TCGA-2Y-A9GX	3	3	3	1	3	1	3	3	3	3
TCGA-2Y-A9GY	9	3	6	4	10	5	1	7	2	8
TCGA-2Y-A9GZ	8	8	3	1	7	2	4	4	6	8
TCGA-2Y-A9H0	1	9	8	6	7	4	5	1	3	10
TCGA-2Y-A9H1	1	7	4	6	3	9	8	5	2	10
TCGA-2Y-A9H2	3	1	4	6	2	5	7	7	7	7
TCGA-2Y-A9H3	8	4	5	6	10	7	1	3	9	2
TCGA-2Y-A9H4	9	1	2	7	3	6	5	8	4	9
TCGA-2Y-A9H5	3	9	4	1	8	5	6	7	2	9
TCGA-2Y-A9H6	1	7	1	5	1	5	8	8	4	8
TCGA-2Y-A9H7	7	9	8	4	5	2	1	3	9	6
TCGA-2Y-A9H8	1	2	7	10	5	9	2	8	5	2
TCGA-2Y-A9H9	9	5	4	6	9	6	3	8	1	2
TCGA-2Y-A9HA	9	7	4	6	1	2	3	8	5	10
TCGA-2Y-A9HB	9	1	5	8	2	3	6	7	10	4
TCGA-2Z-A9J1	9	4	1	5	2	8	6	6	3	9
TCGA-2Z-A9J2	7	1	2	6	5	4	7	7	3	7
TCGA-2Z-A9J3	10	2	4	3	9	7	5	5	8	1
TCGA-2Z-A9J5	1	8	4	7	2	3	9	10	5	6
TCGA-2Z-A9J6	8	2	6	3	9	4	7	5	9	1
TCGA-2Z-A9J7	7	7	6	2	7	2	2	2	7	1
TCGA-2Z-A9J8	1	7	3	1	5	4	7	7	5	7
TCGA-2Z-A9JD	5	7	6	1	3	2	9	8	3	9
TCGA-2Z-A9JE	6	5	3	2	6	1	9	9	4	8
TCGA-2Z-A9JG	10	2	2	7	5	8	9	4	5	1
TCGA-2Z-A9JI	4	4	1	1	4	4	1	4	4	4
TCGA-2Z-A9JJ	3	3	3	3	1	2	7	7	7	7
TCGA-2Z-A9JK	8	1	7	4	6	5	1	1	8	8
TCGA-2Z-A9JL	8	2	2	1	8	6	2	2	8	7
TCGA-2Z-A9JM	6	8	2	4	5	7	8	3	1	8
TCGA-2Z-A9JN	9	1	5	3	5	3	1	5	5	10
TCGA-2Z-A9JO	1	4	5	3	6	1	6	6	6	6
TCGA-2Z-A9JP	6	6	3	1	6	2	6	4	6	5
TCGA-2Z-A9JQ	9	4	8	3	2	1	4	7	4	9
TCGA-2Z-A9JR	7	1	2	5	7	5	3	4	7	7
TCGA-2Z-A9JS	10	2	3	7	4	6	9	8	1	5
TCGA-2Z-A9JT	8	4	5	1	8	1	6	1	10	7
TCGA-30-1714	5	1	7	6	9	8	1	4	10	1
TCGA-30-1718	3	6	5	9	7	8	1	1	10	4
TCGA-30-1853	8	2	3	9	6	7	4	5	10	1
TCGA-30-1855	3	6	4	7	10	9	1	5	8	1
TCGA-30-1856	5	3	7	6	9	8	4	2	10	1
TCGA-30-1857	5	1	6	7	10	8	1	4	9	3
TCGA-30-1862	6	3	8	4	9	7	5	2	10	1
TCGA-30-1891	4	2	6	5	9	7	2	1	9	8
TCGA-31-1950	3	5	7	8	10	6	2	4	9	1
TCGA-31-1953	7	8	6	5	4	2	9	9	1	3
TCGA-31-1959	10	3	2	5	8	4	7	6	8	1
TCGA-32-1970	2	1	6	4	9	8	3	4	10	7
TCGA-32-1976	8	1	5	3	8	6	4	2	7	10
TCGA-32-1977	9	1	5	8	3	7	4	6	10	2
TCGA-32-1979	7	5	6	10	2	9	4	7	2	1
TCGA-32-1980	7	5	5	2	7	2	7	2	1	7
TCGA-32-1982	3	1	6	5	7	4	10	1	9	8
TCGA-32-1986	8	7	5	4	5	1	8	3	2	8
TCGA-32-1991	5	10	9	4	8	2	1	7	3	6
TCGA-32-2491	3	6	8	7	1	4	5	9	1	10
TCGA-32-2494	8	4	5	6	1	6	8	8	1	3
TCGA-32-2495	9	2	7	6	10	5	8	3	4	1
TCGA-32-2615	3	1	1	3	3	3	3	3	3	3
TCGA-32-2616	1	2	6	5	7	4	3	8	10	9
TCGA-32-2632	3	8	2	1	6	5	8	4	7	10
TCGA-32-2634	9	8	3	4	6	2	10	5	6	1
TCGA-32-2638	7	1	2	5	3	5	7	7	4	7
TCGA-32-4208	6	8	6	1	10	1	1	1	9	1
TCGA-32-4209	8	2	3	7	8	4	4	4	1	8
TCGA-32-4210	8	4	4	6	9	7	1	2	9	2
TCGA-32-4211	1	4	6	1	6	1	5	9	8	9
TCGA-32-4213	1	2	6	3	8	5	9	4	7	9
TCGA-32-4719	3	2	1	3	7	3	7	6	7	7
TCGA-32-5222	7	4	3	1	7	1	7	6	7	5
TCGA-33-4532	2	1	4	7	10	8	5	9	6	3
TCGA-33-4533	5	10	7	8	6	4	9	3	1	2
TCGA-33-4538	6	10	7	8	4	9	3	5	1	2
TCGA-33-4547	2	7	3	5	9	6	8	4	10	1
TCGA-33-4566	6	4	8	7	5	2	9	3	1	10
TCGA-33-4582	8	1	7	4	9	6	2	3	10	5
TCGA-33-4583	9	8	7	6	3	4	10	1	5	2
TCGA-33-4586	4	1	2	5	6	10	8	3	7	9
TCGA-33-4587	1	4	3	5	9	10	6	8	7	2
TCGA-33-4589	9	3	8	7	5	4	1	2	6	10
TCGA-33-6737	4	6	8	5	2	3	9	10	7	1
TCGA-33-6738	4	9	8	7	10	6	2	1	5	3
TCGA-33-A4WN	5	6	9	8	4	7	1	2	10	3
TCGA-33-A5GW	10	7	3	6	2	4	9	5	8	1
TCGA-33-AAS8	9	1	6	4	8	3	2	10	5	7
TCGA-33-AASB	9	1	2	3	10	4	6	7	8	5
TCGA-33-AASD	6	7	4	5	1	2	9	8	3	10
TCGA-33-AASI	2	8	6	3	7	4	9	5	10	1
TCGA-33-AASJ	8	9	5	3	2	10	1	6	7	4
TCGA-33-AASL	1	3	2	8	5	7	10	4	6	9
TCGA-34-2596	1	2	5	8	3	4	7	6	9	10
TCGA-34-2600	9	7	5	3	2	4	10	8	6	1
TCGA-34-2604	1	9	4	3	8	2	10	7	6	5
TCGA-34-2605	1	6	8	4	3	5	10	7	2	9
TCGA-34-2608	10	2	8	9	7	5	4	3	6	1
TCGA-34-2609	3	4	6	8	10	7	1	5	9	2
TCGA-34-5231	4	6	8	3	10	7	2	1	9	5
TCGA-34-5232	4	2	5	9	8	7	1	3	6	10
TCGA-34-5234	3	10	9	7	5	4	1	6	8	2
TCGA-34-5236	3	2	5	7	9	8	4	6	10	1
TCGA-34-5239	1	5	7	4	10	6	2	8	9	3
TCGA-34-5240	5	2	8	4	9	6	1	7	10	3
TCGA-34-5241	3	2	8	5	10	4	1	6	9	7
TCGA-34-5927	3	9	7	2	8	4	6	1	10	5
TCGA-34-5928	2	8	7	10	1	4	9	6	3	5
TCGA-34-5929	3	4	8	6	10	7	2	5	9	1
TCGA-34-7107	4	1	5	8	7	3	6	2	9	10
TCGA-34-8454	3	8	5	4	9	2	7	6	10	1
TCGA-34-8455	9	3	6	4	2	7	5	1	8	10
TCGA-34-8456	4	4	3	1	4	1	4	4	4	4
TCGA-34-A5IX	5	4	9	6	8	10	2	3	7	1
TCGA-35-3615	9	1	2	3	6	5	8	4	6	10
TCGA-35-4122	10	5	2	3	4	6	1	7	9	8
TCGA-35-4123	3	2	6	7	9	8	1	4	10	5
TCGA-35-5375	2	8	9	3	10	5	1	6	7	4
TCGA-36-2530	3	1	6	5	8	7	2	4	9	10
TCGA-36-2532	5	2	7	8	3	8	10	5	3	1
TCGA-36-2533	5	1	7	9	10	6	2	2	8	2
TCGA-36-2534	1	8	4	7	9	6	2	3	5	10
TCGA-36-2537	3	8	7	4	9	4	4	1	10	1
TCGA-36-2538	1	3	4	7	9	6	4	8	10	1
TCGA-36-2540	2	2	2	2	2	2	2	2	1	2
TCGA-36-2542	8	4	7	3	9	5	6	2	10	1
TCGA-36-2543	9	8	6	4	10	4	7	1	3	2
TCGA-36-2544	5	1	5	2	9	10	5	8	4	3
TCGA-36-2545	1	9	2	5	3	6	7	4	9	8
TCGA-36-2547	2	10	8	4	3	5	9	7	1	6
TCGA-36-2548	5	2	5	8	3	4	7	10	9	1
TCGA-36-2551	1	1	1	6	9	8	1	6	10	1
TCGA-36-2552	4	3	4	7	9	8	1	4	9	1
TCGA-37-3783	5	9	7	10	3	6	4	8	2	1
TCGA-37-3789	3	2	6	5	10	8	7	4	1	9
TCGA-37-3792	9	6	5	4	8	7	1	2	10	3
TCGA-37-4129	4	4	1	1	4	1	4	4	4	4
TCGA-37-4130	4	9	1	2	6	7	8	3	10	5
TCGA-37-4132	8	2	6	7	10	5	3	4	9	1
TCGA-37-4133	10	4	1	7	3	5	9	6	8	2
TCGA-37-4135	2	6	4	8	3	7	9	10	5	1
TCGA-37-4141	9	7	5	4	6	2	1	8	10	3
TCGA-37-5819	1	10	4	3	9	2	6	7	5	8
TCGA-37-A5EL	6	1	9	8	7	5	4	3	10	2
TCGA-37-A5EM	3	4	8	6	5	7	10	9	2	1
TCGA-37-A5EN	3	4	10	7	6	2	8	5	9	1
TCGA-38-4625	1	3	7	4	8	5	9	2	6	10
TCGA-38-4626	7	2	8	3	9	4	6	1	5	10
TCGA-38-4627	1	1	1	4	7	4	7	4	7	7
TCGA-38-4628	2	5	1	3	7	4	8	8	6	8
TCGA-38-4629	8	1	2	5	7	3	4	6	9	10
TCGA-38-4630	1	5	3	8	2	9	7	4	10	6
TCGA-38-4631	7	4	6	3	8	5	1	2	9	10
TCGA-38-4632	2	10	6	9	7	8	1	3	5	4
TCGA-38-6178	6	8	7	5	9	3	1	1	9	4
TCGA-38-7271	7	1	4	6	2	3	7	7	5	7
TCGA-38-A44F	6	1	1	1	1	1	6	6	6	6
TCGA-39-5011	2	7	6	9	10	8	1	3	5	4
TCGA-39-5016	6	5	2	4	9	7	10	8	1	3
TCGA-39-5019	4	9	8	2	10	6	3	1	7	5
TCGA-39-5021	6	5	7	4	9	3	2	8	10	1
TCGA-39-5022	10	6	7	8	9	4	1	2	5	3
TCGA-39-5024	4	1	5	7	9	8	6	3	10	2
TCGA-39-5027	3	5	6	2	7	1	9	4	8	10
TCGA-39-5028	5	7	6	9	3	4	2	10	1	8
TCGA-39-5029	4	3	8	9	5	6	1	7	10	2
TCGA-39-5030	10	1	2	4	6	3	8	5	7	9
TCGA-39-5031	5	7	9	3	6	4	8	2	10	1
TCGA-39-5034	4	1	3	6	10	7	5	9	2	8
TCGA-39-5035	5	2	6	7	10	8	1	4	9	3
TCGA-39-5036	2	10	8	3	9	5	6	4	7	1
TCGA-39-5037	8	10	3	7	5	9	4	1	5	2
TCGA-39-5039	8	2	5	7	4	6	10	1	3	9
TCGA-39-5040	9	10	7	3	5	4	1	2	6	8
TCGA-3A-A9I5	1	1	1	6	7	1	7	5	7	7
TCGA-3A-A9I7	1	6	8	9	1	1	1	6	1	10
TCGA-3A-A9I9	2	10	5	3	6	7	9	4	8	1
TCGA-3A-A9IB	1	1	6	7	4	7	9	9	4	3
TCGA-3A-A9IC	7	1	1	8	6	9	1	1	5	10
TCGA-3A-A9IH	6	5	7	3	9	2	8	3	10	1
TCGA-3A-A9IJ	2	7	1	4	7	6	2	5	7	7
TCGA-3A-A9IL	1	1	1	1	1	1	1	1	1	1
TCGA-3A-A9IN	6	8	2	6	1	5	2	2	8	8
TCGA-3A-A9IO	8	1	1	4	5	5	8	8	5	1
TCGA-3A-A9IR	6	6	2	2	2	2	6	6	1	6
TCGA-3A-A9IS	1	7	1	3	7	3	7	5	6	7
TCGA-3A-A9IU	2	2	2	2	9	8	2	2	9	1
TCGA-3A-A9IV	9	5	6	7	2	7	9	3	1	4
TCGA-3A-A9IX	4	7	1	2	4	2	7	7	4	10
TCGA-3A-A9IZ	1	5	5	7	9	3	1	8	10	4
TCGA-3A-A9J0	5	2	3	7	10	9	4	6	8	1
TCGA-3B-A9HI	2	10	2	2	2	2	2	2	2	1
TCGA-3B-A9HJ	1	6	1	1	6	1	6	1	6	6
TCGA-3B-A9HL	4	9	6	8	7	5	1	2	2	10
TCGA-3B-A9HO	7	7	3	1	2	3	7	3	3	7
TCGA-3B-A9HP	5	1	4	7	9	8	5	3	9	1
TCGA-3B-A9HQ	1	2	3	6	8	5	9	4	7	9
TCGA-3B-A9HR	7	7	3	4	1	4	7	6	2	7
TCGA-3B-A9HS	1	7	5	3	2	3	8	8	6	8
TCGA-3B-A9HT	1	6	2	4	8	7	5	3	9	10
TCGA-3B-A9HU	1	1	1	7	9	7	1	1	9	1
TCGA-3B-A9HV	7	1	6	4	9	4	2	7	9	3
TCGA-3B-A9HX	1	1	1	1	9	1	1	1	9	1
TCGA-3B-A9HY	5	2	1	8	9	5	2	5	9	2
TCGA-3B-A9HZ	2	4	5	8	10	7	2	1	9	5
TCGA-3B-A9I0	3	3	3	1	3	3	3	1	3	3
TCGA-3B-A9I1	2	5	8	6	10	4	6	2	9	1
TCGA-3B-A9I3	4	1	3	10	7	8	5	9	6	1
TCGA-3C-AAAU	3	3	3	7	9	7	3	2	1	10
TCGA-3C-AALI	4	8	7	10	1	9	2	6	5	3
TCGA-3C-AALJ	7	1	1	5	8	5	1	1	8	8
TCGA-3C-AALK	7	8	3	4	1	5	6	9	2	10
TCGA-3E-AAAY	5	5	2	2	9	2	5	5	9	1
TCGA-3E-AAAZ	7	5	4	3	9	1	2	5	10	8
TCGA-3G-AB0O	1	1	1	1	1	1	1	1	1	1
TCGA-3G-AB0Q	3	3	1	3	2	3	3	3	3	3
TCGA-3G-AB0T	1	1	1	1	1	1	1	1	1	1
TCGA-3G-AB14	1	1	1	1	9	1	1	1	9	1
TCGA-3G-AB19	5	5	5	1	3	3	5	1	5	10
TCGA-3H-AB3K	5	5	3	1	5	3	5	1	5	5
TCGA-3H-AB3L	1	1	6	6	9	6	1	1	10	1
TCGA-3H-AB3M	4	5	2	6	8	6	8	1	3	8
TCGA-3H-AB3O	8	8	2	2	6	2	1	2	6	8
TCGA-3H-AB3S	6	6	6	4	1	6	3	4	1	6
TCGA-3H-AB3T	8	8	8	2	4	3	6	1	4	7
TCGA-3H-AB3U	2	8	1	6	2	2	10	7	2	9
TCGA-3H-AB3X	9	1	6	7	1	5	1	8	1	10
TCGA-3K-AAZ8	6	2	8	5	9	4	3	7	1	10
TCGA-3L-AA1B	2	4	5	8	6	9	1	7	3	10
TCGA-3M-AB46	2	9	4	6	5	3	10	8	7	1
TCGA-3M-AB47	7	5	1	2	6	3	9	4	8	10
TCGA-3P-A9WA	1	7	8	5	10	6	3	4	2	9
TCGA-3Q-A9WF	6	5	4	1	6	1	6	1	6	6
TCGA-3R-A8YX	6	4	1	2	8	3	8	8	4	7
TCGA-3S-A8YW	5	5	1	3	5	3	5	2	5	5
TCGA-3S-AAYX	1	1	1	1	1	1	1	1	1	1
TCGA-3T-AA9L	1	7	1	1	7	1	1	1	7	7
TCGA-3U-A98D	4	4	4	4	2	2	4	4	4	1
TCGA-3U-A98E	4	7	3	8	4	2	10	9	4	1
TCGA-3U-A98F	4	4	1	2	4	4	4	2	4	4
TCGA-3U-A98G	1	1	1	1	1	1	1	1	1	1
TCGA-3U-A98H	3	3	3	2	3	3	3	1	3	10
TCGA-3U-A98I	1	5	5	7	9	1	1	7	9	1
TCGA-3U-A98J	2	6	4	1	6	2	6	4	6	6
TCGA-3X-AAV9	5	7	5	1	7	1	7	3	7	4
TCGA-3X-AAVA	8	9	1	1	5	1	5	1	5	10
TCGA-3X-AAVB	6	2	2	10	8	6	2	2	8	1
TCGA-3X-AAVC	4	1	7	5	8	6	1	10	8	1
TCGA-3X-AAVE	6	6	2	1	3	3	6	3	6	6
TCGA-3Z-A93Z	3	1	2	7	8	6	4	9	5	10
TCGA-41-2571	7	1	6	4	9	4	10	3	8	1
TCGA-41-2572	1	1	7	6	9	8	1	1	1	10
TCGA-41-2573	5	1	7	4	8	3	10	6	9	2
TCGA-41-2575	5	4	7	8	10	1	1	6	9	1
TCGA-41-3392	7	4	6	2	8	3	9	1	4	9
TCGA-41-3393	7	9	2	5	6	4	3	1	8	9
TCGA-41-3915	4	6	5	3	10	8	7	2	9	1
TCGA-41-4097	7	3	6	5	7	1	7	1	7	3
TCGA-41-5651	8	6	5	2	4	3	9	1	7	10
TCGA-41-6646	2	6	6	4	6	5	2	1	9	10
TCGA-42-2582	5	7	8	6	9	4	3	1	10	1
TCGA-42-2587	1	4	9	5	8	6	2	3	10	7
TCGA-42-2588	3	3	3	3	3	1	2	3	3	3
TCGA-42-2589	10	7	8	6	3	9	4	1	5	2
TCGA-42-2590	3	2	8	10	6	7	1	9	3	5
TCGA-42-2591	8	1	6	5	9	4	1	3	10	7
TCGA-42-2593	2	5	7	8	9	6	2	2	9	1
TCGA-43-2576	5	10	4	8	7	6	1	2	3	9
TCGA-43-2578	2	9	6	5	7	8	1	3	4	10
TCGA-43-2581	7	3	4	5	6	2	1	9	10	8
TCGA-43-3394	6	9	8	4	3	7	1	2	5	9
TCGA-43-3920	2	7	6	8	3	9	5	1	10	4
TCGA-43-5668	7	1	6	5	9	4	8	2	10	3
TCGA-43-5670	2	1	4	7	9	6	3	5	9	8
TCGA-43-6143	7	3	8	4	5	6	1	9	10	2
TCGA-43-6647	9	1	3	5	8	6	10	4	7	2
TCGA-43-6770	4	3	7	6	1	8	2	5	10	9
TCGA-43-6771	2	6	8	4	7	5	3	1	9	10
TCGA-43-6773	1	8	7	9	5	1	6	1	10	1
TCGA-43-7656	7	10	4	3	6	5	9	1	2	8
TCGA-43-7657	3	2	6	8	4	7	9	1	4	10
TCGA-43-7658	1	8	3	7	5	6	9	10	4	1
TCGA-43-8115	7	6	9	8	4	5	2	3	1	10
TCGA-43-8116	7	4	3	9	8	5	2	6	10	1
TCGA-43-8118	4	8	6	5	1	7	10	9	3	2
TCGA-43-A474	1	9	6	5	3	7	8	2	4	10
TCGA-43-A475	1	9	7	6	4	5	10	8	3	2
TCGA-43-A56U	2	5	3	6	10	7	8	4	1	9
TCGA-43-A56V	1	5	7	6	9	8	3	4	10	2
TCGA-44-2655	6	9	3	4	7	1	5	2	8	10
TCGA-44-2656	8	4	10	3	5	7	6	2	9	1
TCGA-44-2657	4	2	7	5	10	6	8	3	9	1
TCGA-44-2659	3	8	6	10	2	7	1	4	5	9
TCGA-44-2661	4	1	5	6	2	6	9	8	2	10
TCGA-44-2662	4	2	3	7	6	9	8	10	5	1
TCGA-44-2665	1	8	7	3	5	6	10	1	4	9
TCGA-44-2666	6	3	2	7	3	1	9	8	3	9
TCGA-44-2668	10	8	7	3	2	5	9	4	6	1
TCGA-44-3396	1	5	6	9	2	7	3	4	10	8
TCGA-44-3398	3	1	8	5	9	2	7	6	4	10
TCGA-44-3917	1	7	2	9	8	10	5	4	6	3
TCGA-44-3918	6	4	8	3	9	2	1	7	10	5
TCGA-44-3919	8	8	4	5	1	3	7	2	8	6
TCGA-44-4112	3	7	1	6	2	5	10	4	9	8
TCGA-44-5643	5	3	2	9	4	7	1	8	6	10
TCGA-44-5644	2	10	8	6	7	5	1	3	9	4
TCGA-44-5645	5	3	10	9	1	7	5	8	1	4
TCGA-44-6144	4	1	5	6	8	7	2	9	10	3
TCGA-44-6145	7	9	4	1	8	2	3	5	6	10
TCGA-44-6146	7	8	4	1	4	1	1	10	4	9
TCGA-44-6147	6	3	4	2	8	5	7	8	8	1
TCGA-44-6148	5	4	1	5	5	5	5	3	5	1
TCGA-44-6774	3	8	7	6	9	5	1	4	10	2
TCGA-44-6775	7	8	6	3	4	5	8	2	1	8
TCGA-44-6776	10	1	8	5	9	7	2	3	6	4
TCGA-44-6777	9	8	4	10	1	7	2	6	3	5
TCGA-44-6778	2	9	3	4	5	6	8	10	1	7
TCGA-44-6779	1	6	6	8	9	1	1	1	9	1
TCGA-44-7659	5	6	9	4	2	3	7	10	1	8
TCGA-44-7660	3	1	4	9	6	8	10	2	5	7
TCGA-44-7661	2	1	7	5	9	6	4	3	10	8
TCGA-44-7662	4	6	10	7	2	8	1	5	3	9
TCGA-44-7667	1	4	9	3	7	8	2	6	5	10
TCGA-44-7669	3	1	4	6	8	5	2	7	9	10
TCGA-44-7670	1	8	3	6	9	4	2	5	7	10
TCGA-44-7671	3	2	7	8	5	9	1	4	6	10
TCGA-44-7672	4	2	6	8	3	9	1	5	7	10
TCGA-44-8117	6	1	3	7	8	9	5	2	4	10
TCGA-44-8119	2	1	6	7	3	5	4	9	8	10
TCGA-44-8120	5	6	8	3	7	2	4	9	10	1
TCGA-44-A479	3	7	6	5	10	8	1	2	9	4
TCGA-44-A47A	2	4	3	5	8	6	7	9	1	10
TCGA-44-A47B	3	7	5	2	6	3	7	7	7	1
TCGA-44-A47F	5	2	7	9	3	8	1	6	4	10
TCGA-44-A47G	5	2	1	3	10	8	9	6	4	7
TCGA-44-A4SS	4	8	3	6	10	5	2	7	9	1
TCGA-44-A4SU	3	2	6	7	10	8	4	5	9	1
TCGA-46-3765	6	2	8	7	9	5	4	3	10	1
TCGA-46-3767	3	1	8	7	10	5	3	6	9	1
TCGA-46-3768	1	3	8	9	2	6	5	7	10	4
TCGA-46-3769	1	4	10	6	7	3	2	8	9	5
TCGA-46-6025	8	4	5	9	10	6	1	2	7	3
TCGA-46-6026	3	4	5	8	1	7	6	9	2	10
TCGA-49-4486	2	9	8	6	10	3	1	7	4	5
TCGA-49-4487	7	8	6	4	1	3	10	5	2	9
TCGA-49-4488	4	10	8	3	6	5	1	2	7	9
TCGA-49-4490	5	3	6	7	10	8	1	2	9	4
TCGA-49-4494	3	2	5	7	8	6	9	4	10	1
TCGA-49-4501	9	3	6	2	7	1	3	3	7	10
TCGA-49-4505	9	1	4	6	7	5	3	10	7	2
TCGA-49-4506	4	8	6	5	3	9	1	7	2	10
TCGA-49-4507	2	8	1	5	6	7	4	9	3	10
TCGA-49-4510	3	6	7	10	2	8	3	9	3	1
TCGA-49-4512	1	7	5	2	4	3	7	7	6	7
TCGA-49-4514	3	4	7	8	9	6	2	5	10	1
TCGA-49-6742	10	3	8	6	9	5	2	4	7	1
TCGA-49-6743	1	7	9	8	4	6	3	2	5	10
TCGA-49-6744	7	4	3	8	1	2	6	9	5	10
TCGA-49-6745	2	1	3	7	8	4	10	6	9	5
TCGA-49-6761	10	9	3	2	5	4	8	7	1	6
TCGA-49-6767	9	8	4	7	1	3	2	10	5	6
TCGA-49-AAQV	1	4	7	7	10	6	3	5	9	1
TCGA-49-AAR0	7	5	4	6	10	8	2	3	9	1
TCGA-49-AAR2	7	10	6	8	2	4	3	1	5	9
TCGA-49-AAR3	7	7	9	6	2	4	3	5	1	10
TCGA-49-AAR4	5	6	2	4	8	3	1	7	10	9
TCGA-49-AAR9	4	3	5	6	8	7	10	2	9	1
TCGA-49-AARE	1	7	8	5	10	6	2	4	9	3
TCGA-49-AARN	8	7	5	4	6	2	1	3	10	9
TCGA-49-AARO	9	10	5	4	7	6	8	3	1	2
TCGA-49-AARQ	5	8	4	7	2	9	3	10	6	1
TCGA-49-AARR	4	4	1	1	4	4	4	1	4	4
TCGA-4A-A93W	6	1	2	4	9	5	7	3	8	10
TCGA-4A-A93X	6	10	5	4	8	7	2	9	3	1
TCGA-4A-A93Y	1	1	1	1	1	1	1	1	1	1
TCGA-4B-A93V	5	3	2	6	8	9	4	10	7	1
TCGA-4C-A93U	4	1	2	3	4	7	9	8	4	9
TCGA-4E-A92E	6	1	10	9	7	8	5	3	4	2
TCGA-4G-AAZO	7	1	5	4	8	3	6	2	9	9
TCGA-4G-AAZT	8	3	3	3	1	3	3	8	1	10
TCGA-4H-AAAK	6	6	6	3	5	3	1	2	9	9
TCGA-4J-AA1J	2	10	9	5	6	3	8	4	1	7
TCGA-4K-AA1G	1	1	1	1	7	1	8	1	8	8
TCGA-4K-AA1H	1	1	1	1	1	1	1	1	1	10
TCGA-4K-AA1I	4	1	2	4	3	4	4	4	4	4
TCGA-4K-AAAL	2	2	2	1	2	2	2	2	2	10
TCGA-4L-AA1F	8	1	4	7	8	4	1	1	6	8
TCGA-4N-A93T	2	8	9	6	3	10	1	5	3	7
TCGA-4P-AA8J	6	7	8	5	3	2	1	4	10	9
TCGA-4R-AA8I	6	9	8	5	10	3	1	2	7	4
TCGA-4T-AA8H	7	3	8	9	4	6	5	2	1	10
TCGA-4V-A9QI	1	1	1	1	1	1	1	1	1	1
TCGA-4V-A9QJ	5	1	5	5	10	8	1	1	9	1
TCGA-4V-A9QL	5	5	1	1	1	1	5	5	5	5
TCGA-4V-A9QM	1	5	5	1	5	1	5	1	5	5
TCGA-4V-A9QN	3	3	3	1	3	3	3	1	3	3
TCGA-4V-A9QQ	1	1	9	1	1	1	8	1	1	10
TCGA-4V-A9QR	3	3	1	3	3	3	3	2	3	3
TCGA-4V-A9QS	2	2	2	2	2	2	2	2	1	2
TCGA-4V-A9QT	1	1	1	1	1	1	1	1	1	1
TCGA-4V-A9QU	1	4	4	1	4	1	4	4	4	4
TCGA-4V-A9QW	5	5	3	3	5	2	5	1	5	5
TCGA-4V-A9QX	3	1	3	3	3	3	3	3	3	1
TCGA-4W-AA9R	1	5	7	6	10	8	1	8	3	4
TCGA-4W-AA9S	6	6	4	3	6	5	6	1	6	2
TCGA-4W-AA9T	1	2	4	5	9	6	8	2	10	7
TCGA-4X-A9F9	1	1	1	1	1	1	1	1	1	1
TCGA-4X-A9FA	6	6	5	1	3	2	6	6	3	6
TCGA-4X-A9FB	2	2	2	2	2	2	2	1	2	2
TCGA-4X-A9FC	1	1	1	1	1	1	1	1	1	1
TCGA-4X-A9FD	6	3	6	4	1	5	8	8	1	8
TCGA-4Z-AA7M	1	2	4	5	9	8	10	7	3	6
TCGA-4Z-AA7N	2	2	2	2	2	2	2	2	2	1
TCGA-4Z-AA7O	7	5	8	2	9	6	1	4	3	10
TCGA-4Z-AA7Q	4	2	8	7	9	5	3	6	10	1
TCGA-4Z-AA7R	7	8	6	10	1	9	5	3	2	4
TCGA-4Z-AA7S	6	10	7	4	8	2	1	5	9	3
TCGA-4Z-AA7W	6	10	1	7	3	2	5	9	8	4
TCGA-4Z-AA7Y	6	1	3	7	9	4	5	2	8	10
TCGA-4Z-AA80	3	10	4	8	6	7	2	1	5	9
TCGA-4Z-AA81	7	3	8	9	1	6	2	4	5	10
TCGA-4Z-AA82	9	1	6	4	8	3	9	5	7	2
TCGA-4Z-AA83	9	1	3	5	7	6	2	4	9	8
TCGA-4Z-AA84	4	3	8	7	9	6	2	5	10	1
TCGA-4Z-AA86	1	2	3	4	8	5	6	7	10	9
TCGA-4Z-AA87	8	7	6	4	10	3	2	5	9	1
TCGA-4Z-AA89	9	1	4	8	6	7	3	5	2	10
TCGA-50-5044	9	5	4	2	6	8	3	1	10	7
TCGA-50-5045	7	8	10	5	3	4	2	1	6	9
TCGA-50-5049	7	2	5	3	9	6	4	1	8	10
TCGA-50-5051	3	8	5	9	1	7	4	6	2	10
TCGA-50-5055	3	3	3	3	1	3	3	3	1	3
TCGA-50-5066	3	1	7	2	6	4	8	5	9	10
TCGA-50-5068	6	7	4	2	5	3	8	8	1	8
TCGA-50-5072	8	1	3	5	6	4	9	2	7	10
TCGA-50-5930	7	2	3	4	8	1	9	5	6	10
TCGA-50-5931	8	6	4	3	10	7	1	2	9	5
TCGA-50-5932	5	1	2	3	7	8	9	6	4	10
TCGA-50-5933	4	7	6	2	9	5	1	3	8	10
TCGA-50-5935	2	9	8	6	7	5	3	3	1	10
TCGA-50-5936	6	3	5	1	8	2	7	4	9	10
TCGA-50-5939	6	3	4	7	9	8	2	5	10	1
TCGA-50-5941	1	3	2	10	8	7	4	9	5	6
TCGA-50-5942	2	2	2	8	6	7	1	10	2	9
TCGA-50-5944	3	7	5	6	10	4	1	8	9	1
TCGA-50-5946	4	3	5	8	2	7	6	10	9	1
TCGA-50-6590	1	9	7	5	6	4	8	2	3	10
TCGA-50-6591	1	2	2	2	7	6	8	2	8	8
TCGA-50-6592	5	1	6	8	3	4	2	9	7	10
TCGA-50-6593	4	5	3	7	9	6	2	8	10	1
TCGA-50-6594	6	4	9	7	5	8	1	10	3	2
TCGA-50-6595	1	4	8	7	5	3	9	2	5	10
TCGA-50-6597	5	9	1	5	2	4	5	5	2	9
TCGA-50-6673	1	5	9	8	3	4	1	7	10	6
TCGA-50-7109	2	1	9	8	6	4	5	3	6	10
TCGA-50-8457	9	9	6	2	7	5	1	4	7	3
TCGA-50-8459	3	4	5	8	6	9	1	7	2	10
TCGA-50-8460	8	4	6	5	2	7	8	8	2	1
TCGA-51-4079	1	8	4	3	9	6	2	5	7	10
TCGA-51-4080	10	7	8	3	6	5	9	2	4	1
TCGA-51-4081	1	8	6	2	9	7	4	3	10	5
TCGA-51-6867	5	6	8	9	2	10	3	1	4	7
TCGA-52-7622	4	1	9	6	5	10	7	3	8	2
TCGA-52-7809	8	7	6	5	4	2	9	3	1	10
TCGA-52-7810	4	2	6	8	5	7	1	9	3	10
TCGA-52-7811	6	7	4	8	2	1	3	5	9	10
TCGA-52-7812	4	1	6	8	3	9	5	7	2	10
TCGA-53-7624	7	3	6	5	8	4	1	2	9	10
TCGA-53-7626	9	3	4	5	1	2	10	6	7	8
TCGA-53-7813	10	6	3	4	8	7	2	5	9	1
TCGA-53-A4EZ	3	10	6	9	4	7	2	5	8	1
TCGA-55-1592	3	2	8	9	6	7	4	5	10	1
TCGA-55-1594	7	8	4	3	9	4	2	6	10	1
TCGA-55-1595	3	2	8	10	1	6	9	5	4	7
TCGA-55-1596	5	1	3	6	7	4	2	8	10	9
TCGA-55-5899	6	3	5	7	10	9	1	4	8	2
TCGA-55-6543	8	4	7	4	8	3	8	4	2	1
TCGA-55-6642	10	3	5	6	7	9	8	2	1	3
TCGA-55-6712	6	7	3	4	8	2	9	5	9	1
TCGA-55-6968	5	10	9	3	6	7	4	2	8	1
TCGA-55-6969	3	5	9	7	10	6	1	8	2	4
TCGA-55-6970	2	5	1	4	7	3	8	9	6	10
TCGA-55-6971	9	7	3	2	6	4	9	5	8	1
TCGA-55-6972	1	9	3	4	5	8	2	6	7	10
TCGA-55-6975	9	1	6	10	5	7	3	8	1	4
TCGA-55-6978	1	1	1	1	1	1	1	1	1	1
TCGA-55-6979	7	9	6	5	8	2	3	4	1	10
TCGA-55-6980	4	4	4	4	1	1	4	4	1	4
TCGA-55-6981	1	8	2	5	9	7	6	9	4	3
TCGA-55-6982	9	8	6	10	2	5	4	7	3	1
TCGA-55-6983	1	1	4	8	7	9	1	6	5	10
TCGA-55-6984	1	2	2	2	2	9	2	2	2	10
TCGA-55-6985	8	9	2	3	4	5	1	6	7	10
TCGA-55-6986	5	5	2	2	1	5	5	5	5	4
TCGA-55-6987	8	5	3	4	6	2	10	1	6	9
TCGA-55-7227	4	5	3	6	10	7	1	9	8	1
TCGA-55-7281	4	10	6	7	1	5	2	8	3	9
TCGA-55-7283	2	3	7	9	5	8	4	1	6	10
TCGA-55-7284	1	4	5	9	6	8	1	7	1	10
TCGA-55-7570	5	2	3	6	9	10	4	7	8	1
TCGA-55-7573	6	6	1	3	6	1	4	5	6	6
TCGA-55-7574	9	1	6	7	2	3	5	8	4	10
TCGA-55-7576	1	2	6	4	8	7	5	3	9	10
TCGA-55-7724	4	5	8	6	9	7	2	1	10	3
TCGA-55-7725	3	2	8	5	7	1	6	4	9	10
TCGA-55-7726	1	3	8	4	9	6	5	2	7	10
TCGA-55-7727	3	6	4	9	5	7	8	10	1	2
TCGA-55-7728	6	2	9	7	3	8	1	5	3	10
TCGA-55-7815	5	6	7	9	1	10	3	4	8	2
TCGA-55-7903	4	2	6	3	8	5	9	1	7	9
TCGA-55-7907	9	8	3	7	4	10	6	2	5	1
TCGA-55-7910	5	1	3	9	8	4	7	6	10	2
TCGA-55-7911	5	9	7	8	3	6	2	1	4	10
TCGA-55-7913	5	1	8	2	4	3	10	7	6	9
TCGA-55-7914	10	9	3	5	7	2	4	6	8	1
TCGA-55-7994	1	2	4	8	3	6	7	5	9	10
TCGA-55-7995	1	2	6	8	9	7	4	5	3	10
TCGA-55-8085	8	6	7	5	4	3	9	10	1	2
TCGA-55-8087	1	3	1	3	3	3	3	3	3	3
TCGA-55-8089	7	4	5	6	1	3	9	8	2	10
TCGA-55-8090	4	1	2	5	9	3	7	6	8	10
TCGA-55-8091	7	1	1	1	7	1	1	1	7	7
TCGA-55-8092	2	1	9	8	5	4	7	3	6	10
TCGA-55-8094	5	3	6	7	10	9	2	4	8	1
TCGA-55-8096	4	1	6	5	9	8	3	2	7	10
TCGA-55-8097	2	4	6	5	1	8	3	7	10	9
TCGA-55-8203	3	4	2	5	1	6	8	7	9	10
TCGA-55-8204	4	1	7	5	10	6	9	3	8	2
TCGA-55-8205	2	10	9	6	3	5	7	8	4	1
TCGA-55-8206	1	8	3	2	5	7	8	4	5	8
TCGA-55-8207	4	9	3	5	6	7	2	8	1	10
TCGA-55-8208	4	2	6	7	10	8	3	5	9	1
TCGA-55-8299	9	3	4	7	10	8	6	2	5	1
TCGA-55-8301	6	3	8	7	10	9	5	4	2	1
TCGA-55-8302	3	5	8	6	9	10	2	4	7	1
TCGA-55-8505	4	1	3	1	8	8	4	4	4	10
TCGA-55-8506	3	10	8	5	7	6	2	4	9	1
TCGA-55-8507	6	10	5	9	7	3	1	4	8	2
TCGA-55-8508	6	7	9	5	4	8	2	3	1	10
TCGA-55-8510	8	1	5	6	7	4	2	3	10	9
TCGA-55-8511	9	10	6	8	3	4	2	5	1	7
TCGA-55-8512	2	5	2	2	5	1	5	5	5	5
TCGA-55-8513	1	1	1	1	1	1	1	1	1	1
TCGA-55-8514	2	4	3	7	9	6	8	5	10	1
TCGA-55-8614	4	2	5	7	8	10	9	6	3	1
TCGA-55-8615	4	2	6	5	8	7	3	1	9	10
TCGA-55-8616	10	3	9	7	5	6	4	8	2	1
TCGA-55-8619	6	6	1	3	6	4	5	6	6	1
TCGA-55-8620	5	4	9	6	8	7	3	10	2	1
TCGA-55-8621	9	8	2	5	6	4	3	1	6	10
TCGA-55-A48X	10	9	8	4	6	3	5	2	1	7
TCGA-55-A48Y	3	9	6	8	5	7	1	2	4	10
TCGA-55-A48Z	9	5	7	8	4	6	3	2	10	1
TCGA-55-A490	9	1	7	6	3	2	4	5	8	10
TCGA-55-A491	3	10	6	4	8	5	2	1	9	7
TCGA-55-A492	2	10	1	4	6	5	9	7	8	3
TCGA-55-A493	7	2	5	10	4	8	6	3	9	1
TCGA-55-A494	4	8	6	2	3	7	5	9	1	10
TCGA-55-A4DF	1	5	3	7	9	6	10	4	8	2
TCGA-55-A4DG	10	3	6	7	4	9	5	8	2	1
TCGA-55-A57B	1	8	1	1	9	1	1	1	9	1
TCGA-56-1622	3	1	7	10	5	6	2	9	8	4
TCGA-56-5897	5	8	7	3	9	4	1	6	10	2
TCGA-56-5898	7	9	5	8	6	3	1	4	10	1
TCGA-56-6545	4	10	6	8	2	3	9	5	7	1
TCGA-56-6546	4	1	8	7	10	3	2	5	9	6
TCGA-56-7221	9	5	2	8	10	7	1	4	6	3
TCGA-56-7222	2	4	10	5	9	8	3	6	7	1
TCGA-56-7223	4	1	6	9	3	8	2	7	10	5
TCGA-56-7579	8	6	9	7	1	5	4	3	1	10
TCGA-56-7580	8	5	10	9	4	7	1	3	6	2
TCGA-56-7582	8	6	2	4	9	7	5	3	10	1
TCGA-56-7730	2	5	8	9	1	7	6	10	4	3
TCGA-56-7731	10	3	6	7	4	5	9	2	8	1
TCGA-56-7822	5	3	9	8	1	7	4	10	2	6
TCGA-56-7823	3	10	4	7	5	8	2	6	9	1
TCGA-56-8082	4	1	9	6	3	2	5	7	8	10
TCGA-56-8083	10	1	8	3	4	7	2	5	6	9
TCGA-56-8201	8	4	9	6	10	7	2	3	5	1
TCGA-56-8304	1	3	9	5	8	6	2	7	10	4
TCGA-56-8305	10	9	2	6	5	8	7	4	3	1
TCGA-56-8307	9	1	6	5	7	4	2	8	10	3
TCGA-56-8308	1	8	3	4	10	5	7	2	6	9
TCGA-56-8309	8	3	7	1	9	4	2	6	10	5
TCGA-56-8503	1	4	7	8	5	6	3	9	10	1
TCGA-56-8504	3	2	8	6	9	5	1	7	10	4
TCGA-56-8622	4	1	5	8	9	6	2	7	10	3
TCGA-56-8624	4	9	6	2	7	5	9	1	8	3
TCGA-56-8625	9	1	3	5	4	6	10	8	2	7
TCGA-56-8626	8	10	9	6	3	5	7	4	2	1
TCGA-56-8628	9	8	3	2	6	4	7	1	5	10
TCGA-56-8629	1	6	8	4	10	3	5	9	7	2
TCGA-56-A49D	5	1	9	8	7	6	3	2	4	10
TCGA-56-A4BW	8	1	4	2	9	3	6	5	10	7
TCGA-56-A4BX	3	7	9	8	1	10	4	2	6	5
TCGA-56-A4BY	4	3	7	10	5	8	1	9	6	2
TCGA-56-A4ZJ	8	5	2	4	3	6	8	7	1	8
TCGA-56-A4ZK	3	6	7	8	10	1	4	5	9	2
TCGA-56-A5DR	8	2	7	5	6	3	4	9	1	10
TCGA-56-A5DS	3	8	2	1	6	5	4	7	9	10
TCGA-56-A62T	6	2	7	5	3	4	8	9	1	10
TCGA-57-1586	6	6	1	1	1	1	6	6	1	6
TCGA-57-1992	3	6	9	5	8	4	1	7	2	10
TCGA-57-1993	4	3	9	5	10	8	2	7	6	1
TCGA-57-1994	9	8	2	1	5	4	2	6	7	9
TCGA-58-8386	4	9	5	3	10	6	1	2	8	7
TCGA-58-8387	3	8	5	6	1	4	7	2	9	10
TCGA-58-8388	6	2	7	4	9	5	1	3	10	8
TCGA-58-8390	7	10	3	8	1	6	9	5	4	2
TCGA-58-8391	5	8	7	4	10	6	1	3	9	2
TCGA-58-8392	1	5	8	7	9	6	2	4	10	3
TCGA-58-8393	2	6	7	10	5	8	9	4	3	1
TCGA-58-A46J	9	3	6	7	2	8	4	5	10	1
TCGA-58-A46K	4	1	8	5	10	6	2	7	9	3
TCGA-58-A46L	6	1	9	4	2	8	7	3	5	10
TCGA-58-A46M	1	3	7	4	6	10	5	8	2	9
TCGA-58-A46N	3	1	5	8	6	7	4	9	10	1
TCGA-59-2348	1	1	4	6	9	7	5	8	10	3
TCGA-59-2349	3	2	8	4	7	6	9	5	10	1
TCGA-59-2350	3	7	8	6	9	5	2	1	9	4
TCGA-59-2351	2	4	6	3	8	5	10	7	9	1
TCGA-59-2352	1	4	1	6	9	7	5	8	10	1
TCGA-59-2354	7	3	5	6	4	10	8	8	1	2
TCGA-59-2355	1	8	1	7	9	1	1	1	9	1
TCGA-59-2363	3	10	8	7	6	1	4	2	9	5
TCGA-59-2372	3	8	7	5	9	6	4	1	10	2
TCGA-59-A5PD	1	9	3	7	6	5	8	4	10	2
TCGA-5B-A90C	5	3	6	7	9	7	4	2	9	1
TCGA-5C-A9VG	7	3	8	6	9	5	1	2	4	10
TCGA-5C-A9VH	8	1	6	5	10	7	1	3	4	9
TCGA-5C-AAPD	7	7	4	6	1	10	9	5	2	3
TCGA-5G-A9ZZ	3	3	2	3	3	3	3	3	1	3
TCGA-5K-AAAP	3	3	1	3	1	3	3	3	3	3
TCGA-5L-AAT0	7	4	9	3	5	6	1	2	8	10
TCGA-5L-AAT1	2	10	9	6	3	1	8	4	7	5
TCGA-5M-AAT4	5	4	8	6	10	7	1	2	9	3
TCGA-5M-AAT6	6	2	3	7	9	4	8	5	10	1
TCGA-5M-AATE	4	2	8	5	9	6	1	3	7	10
TCGA-5N-A9KI	8	2	7	5	9	4	3	6	10	1
TCGA-5N-A9KM	8	4	3	1	7	5	10	6	2	9
TCGA-5P-A9JU	4	9	6	1	5	3	9	1	7	8
TCGA-5P-A9JV	8	7	4	5	1	3	8	8	2	6
TCGA-5P-A9JW	9	1	5	7	4	6	3	8	9	2
TCGA-5P-A9JY	9	8	3	6	2	4	9	5	1	7
TCGA-5P-A9JZ	2	7	2	1	5	5	7	7	4	7
TCGA-5P-A9K0	9	6	2	1	5	3	8	7	4	9
TCGA-5P-A9K2	1	6	1	7	5	4	8	8	3	8
TCGA-5P-A9K3	2	8	5	7	10	9	2	4	6	1
TCGA-5P-A9K6	1	1	1	1	7	7	1	1	9	10
TCGA-5P-A9K8	1	1	1	1	1	1	1	1	1	1
TCGA-5P-A9KA	9	7	8	6	3	4	1	5	2	10
TCGA-5P-A9KC	3	10	8	9	7	2	3	6	5	1
TCGA-5P-A9KE	2	9	8	7	1	4	5	5	3	10
TCGA-5P-A9KH	1	5	1	5	3	3	5	5	5	5
TCGA-5R-AA1C	9	5	6	4	8	3	2	1	7	10
TCGA-5R-AA1D	1	7	6	1	7	1	1	5	7	7
TCGA-5R-AAAM	8	2	5	1	8	3	8	6	4	7
TCGA-5S-A9Q8	8	1	3	7	9	5	4	6	10	2
TCGA-5T-A9QA	6	6	3	4	1	5	6	9	1	10
TCGA-5U-AB0D	8	7	6	3	1	2	9	3	5	9
TCGA-5U-AB0E	2	1	2	7	2	7	9	2	2	10
TCGA-5U-AB0F	5	5	5	1	1	1	4	5	5	5
TCGA-5V-A9RR	1	1	1	1	1	1	1	1	1	1
TCGA-5X-AA5U	4	7	2	1	7	2	4	7	4	7
TCGA-60-2695	6	4	7	5	10	8	2	3	9	1
TCGA-60-2697	3	3	3	1	3	1	3	3	3	3
TCGA-60-2698	1	8	4	3	2	5	9	7	6	10
TCGA-60-2703	7	9	8	4	6	3	2	1	10	5
TCGA-60-2704	9	2	6	8	4	7	10	5	1	3
TCGA-60-2706	1	2	4	3	5	6	9	7	8	9
TCGA-60-2707	8	1	5	4	8	6	8	3	7	1
TCGA-60-2708	8	4	1	6	2	3	9	7	5	10
TCGA-60-2709	1	5	10	6	7	4	1	3	8	9
TCGA-60-2710	3	8	4	5	9	2	6	7	1	10
TCGA-60-2711	2	10	3	5	4	6	8	8	7	1
TCGA-60-2712	4	6	4	3	9	2	6	1	6	10
TCGA-60-2713	6	2	1	3	9	4	7	5	8	10
TCGA-60-2714	7	2	5	8	9	6	4	3	10	1
TCGA-60-2715	9	8	3	6	2	6	1	9	4	5
TCGA-60-2716	3	3	3	3	1	3	3	3	1	3
TCGA-60-2719	2	7	10	9	4	3	6	5	8	1
TCGA-60-2720	3	9	5	6	7	8	2	4	10	1
TCGA-60-2721	9	7	3	4	5	2	8	6	10	1
TCGA-60-2722	4	3	2	5	7	6	9	10	8	1
TCGA-60-2723	10	2	3	5	7	8	1	6	9	4
TCGA-60-2724	3	8	6	4	5	2	8	1	7	10
TCGA-60-2725	6	8	5	7	2	3	10	4	1	9
TCGA-60-2726	3	1	6	5	7	4	8	10	2	9
TCGA-61-1722	4	8	7	6	9	5	3	1	10	2
TCGA-61-1725	1	3	5	8	9	10	6	4	7	1
TCGA-61-1727	1	3	6	4	9	8	5	7	10	2
TCGA-61-1728	4	3	5	7	10	8	2	6	9	1
TCGA-61-1730	4	2	9	8	5	6	2	7	10	1
TCGA-61-1733	3	4	7	8	9	6	1	5	9	2
TCGA-61-1734	6	2	1	4	8	5	9	2	7	9
TCGA-61-1736	8	3	7	5	9	6	2	4	10	1
TCGA-61-1737	1	3	8	6	9	5	7	4	10	2
TCGA-61-1738	5	2	2	9	6	9	2	8	6	1
TCGA-61-1740	6	10	7	2	1	3	9	4	5	8
TCGA-61-1741	2	4	5	5	9	5	3	8	9	1
TCGA-61-1895	6	2	7	4	9	3	1	5	8	10
TCGA-61-1899	6	3	8	5	9	7	4	2	10	1
TCGA-61-1900	2	9	4	5	3	7	6	8	1	10
TCGA-61-1901	3	9	6	8	2	7	4	4	1	10
TCGA-61-1903	6	5	2	8	9	7	2	4	9	1
TCGA-61-1904	5	2	8	6	10	7	3	4	9	1
TCGA-61-1906	3	2	5	7	10	8	4	6	9	1
TCGA-61-1907	2	1	8	7	10	6	3	4	9	5
TCGA-61-1910	1	9	2	5	8	3	4	6	7	9
TCGA-61-1911	4	1	5	7	10	9	1	8	6	1
TCGA-61-1913	4	5	2	10	7	3	5	9	7	1
TCGA-61-1914	7	9	4	5	6	10	1	2	8	3
TCGA-61-1915	2	6	7	8	5	4	1	9	10	3
TCGA-61-1919	1	8	3	6	10	5	2	7	9	4
TCGA-61-1995	5	3	6	8	9	7	4	2	10	1
TCGA-61-1998	1	9	10	6	4	3	5	7	8	2
TCGA-61-2000	2	6	9	7	1	8	4	10	3	5
TCGA-61-2002	3	1	7	8	5	8	6	4	10	1
TCGA-61-2003	1	6	2	7	3	4	10	8	5	9
TCGA-61-2008	8	10	5	4	6	7	1	3	9	2
TCGA-61-2009	4	8	10	6	9	3	2	5	7	1
TCGA-61-2012	4	9	7	5	2	3	8	1	6	10
TCGA-61-2016	4	2	4	6	9	7	7	2	9	1
TCGA-61-2018	3	6	7	8	10	5	1	4	9	2
TCGA-61-2087	1	4	7	6	9	7	1	3	10	5
TCGA-61-2088	1	5	1	4	5	3	5	5	5	5
TCGA-61-2092	7	1	6	5	8	9	1	3	10	4
TCGA-61-2094	3	1	8	6	5	7	9	4	10	1
TCGA-61-2095	4	3	5	8	7	10	2	9	6	1
TCGA-61-2096	9	5	4	7	10	6	3	2	8	1
TCGA-61-2101	1	5	5	2	4	3	8	8	8	5
TCGA-61-2102	1	1	6	8	9	7	4	5	10	1
TCGA-61-2104	1	1	8	6	9	6	1	1	9	1
TCGA-61-2109	8	1	6	9	2	7	4	5	2	10
TCGA-61-2110	3	1	8	9	10	4	5	2	6	7
TCGA-61-2111	4	5	7	6	10	3	2	8	9	1
TCGA-61-2113	6	9	8	5	10	4	2	1	7	3
TCGA-61-2612	3	5	4	7	9	8	1	6	10	1
TCGA-61-2613	4	5	3	8	10	6	1	7	9	1
TCGA-61-2614	3	6	2	7	9	7	3	3	9	1
TCGA-62-8394	3	2	8	5	7	4	10	1	6	9
TCGA-62-8395	1	7	8	6	2	4	9	5	3	9
TCGA-62-8397	2	7	2	2	7	5	7	5	1	7
TCGA-62-8398	1	5	8	7	5	4	1	9	1	10
TCGA-62-8399	3	2	6	10	5	7	4	8	9	1
TCGA-62-8402	4	5	6	8	9	7	1	3	10	1
TCGA-62-A46O	2	4	9	7	3	8	1	5	6	10
TCGA-62-A46P	3	7	4	6	5	8	1	2	10	9
TCGA-62-A46R	3	4	6	7	2	10	1	8	5	9
TCGA-62-A46S	7	3	2	1	9	4	6	8	5	10
TCGA-62-A46U	1	1	1	6	9	7	1	1	9	8
TCGA-62-A46V	5	5	3	4	5	5	1	2	5	10
TCGA-62-A46Y	1	8	6	5	10	9	1	6	4	3
TCGA-62-A470	7	6	2	3	1	4	9	8	5	10
TCGA-62-A471	3	4	5	9	8	6	1	2	10	7
TCGA-62-A472	1	1	3	6	4	7	8	8	5	8
TCGA-63-5128	1	10	2	7	4	5	9	3	8	6
TCGA-63-5131	1	2	3	7	10	8	4	6	5	9
TCGA-63-6202	6	7	8	4	10	3	1	2	9	5
TCGA-63-7020	1	8	7	5	2	6	10	3	4	8
TCGA-63-7021	6	3	9	2	8	7	5	10	1	4
TCGA-63-7022	8	6	3	7	5	9	10	4	2	1
TCGA-63-7023	8	3	5	7	1	2	10	6	4	9
TCGA-63-A5M9	1	3	5	7	9	8	3	1	9	6
TCGA-63-A5MB	9	10	8	2	5	4	6	3	7	1
TCGA-63-A5MG	8	5	2	4	7	1	8	3	8	5
TCGA-63-A5MH	10	2	8	6	4	5	7	3	9	1
TCGA-63-A5MI	9	3	6	5	10	2	4	1	8	7
TCGA-63-A5MJ	9	4	2	6	7	5	10	1	3	8
TCGA-63-A5ML	5	1	6	8	2	4	3	7	10	9
TCGA-63-A5MM	10	3	7	8	1	4	5	9	2	6
TCGA-63-A5MN	4	4	3	1	4	2	4	4	4	4
TCGA-63-A5MP	4	6	8	10	9	5	1	1	7	3
TCGA-63-A5MR	6	9	3	4	8	5	10	2	7	1
TCGA-63-A5MS	7	9	2	6	3	5	8	4	1	10
TCGA-63-A5MT	7	6	5	2	9	3	4	8	10	1
TCGA-63-A5MU	5	10	6	9	7	4	2	1	3	8
TCGA-63-A5MV	1	7	9	2	6	3	4	5	10	8
TCGA-63-A5MW	10	1	7	3	5	6	4	2	9	8
TCGA-63-A5MY	4	1	8	3	9	6	2	7	5	10
TCGA-64-1676	4	9	6	5	3	2	7	10	1	8
TCGA-64-1677	1	2	6	10	5	8	7	3	4	9
TCGA-64-1679	8	7	4	3	5	1	10	6	9	2
TCGA-64-1680	7	8	6	4	1	3	8	2	5	8
TCGA-64-1681	2	4	4	7	9	8	3	6	10	1
TCGA-64-5774	9	5	4	7	1	8	10	6	2	3
TCGA-64-5775	2	7	8	5	10	4	9	3	1	6
TCGA-64-5778	8	5	9	2	6	3	10	4	7	1
TCGA-64-5779	4	3	2	6	9	5	10	8	7	1
TCGA-64-5781	5	1	3	4	7	8	9	2	6	10
TCGA-64-5815	6	9	5	2	8	3	4	1	7	10
TCGA-66-2727	5	2	7	8	6	9	3	4	10	1
TCGA-66-2734	4	2	3	5	9	8	7	6	10	1
TCGA-66-2742	6	4	7	5	10	8	2	3	9	1
TCGA-66-2744	7	2	8	6	1	4	10	9	3	5
TCGA-66-2754	3	6	9	5	8	7	4	1	10	2
TCGA-66-2755	2	7	3	6	4	5	9	8	1	10
TCGA-66-2756	1	2	9	8	7	5	6	4	3	10
TCGA-66-2757	4	9	7	5	8	6	1	2	10	3
TCGA-66-2758	3	10	9	6	4	8	7	5	2	1
TCGA-66-2759	5	9	8	3	7	4	2	6	10	1
TCGA-66-2763	10	2	6	7	5	9	1	4	8	3
TCGA-66-2765	7	8	6	4	10	5	2	1	9	2
TCGA-66-2766	2	6	3	9	8	5	10	4	7	1
TCGA-66-2767	9	1	7	3	10	5	2	4	8	6
TCGA-66-2768	2	7	5	4	9	3	8	6	10	1
TCGA-66-2769	9	5	7	4	2	6	10	1	3	8
TCGA-66-2770	9	2	1	4	6	3	9	7	5	8
TCGA-66-2771	1	9	4	8	7	6	3	2	5	10
TCGA-66-2773	4	10	8	3	7	2	9	6	1	5
TCGA-66-2777	2	3	7	4	9	5	10	8	6	1
TCGA-66-2778	4	1	9	8	6	7	1	5	3	10
TCGA-66-2780	2	5	4	9	1	8	3	6	7	10
TCGA-66-2781	7	4	1	5	3	6	7	7	2	7
TCGA-66-2782	7	1	6	8	4	9	3	5	10	2
TCGA-66-2783	9	5	2	7	3	8	10	6	4	1
TCGA-66-2785	10	4	9	6	8	7	5	3	2	1
TCGA-66-2786	4	3	7	9	2	8	6	10	5	1
TCGA-66-2787	8	10	3	4	6	5	2	7	9	1
TCGA-66-2788	3	2	6	9	1	4	5	10	7	8
TCGA-66-2789	4	6	3	5	9	8	2	1	10	7
TCGA-66-2791	2	10	9	8	6	5	1	3	4	7
TCGA-66-2792	8	10	2	5	6	7	9	4	3	1
TCGA-66-2793	1	5	8	4	10	6	7	3	9	2
TCGA-66-2794	9	2	5	7	10	8	3	4	6	1
TCGA-66-2795	4	9	2	8	7	5	6	10	1	3
TCGA-66-2800	6	8	1	3	7	2	9	5	10	4
TCGA-67-3770	10	8	9	3	6	7	4	2	5	1
TCGA-67-3771	3	6	7	9	8	4	2	5	10	1
TCGA-67-3772	2	2	2	1	7	6	9	2	7	9
TCGA-67-3773	10	1	9	4	7	5	2	3	6	8
TCGA-67-3774	1	2	9	8	4	10	2	7	6	5
TCGA-67-4679	3	9	4	2	8	1	5	7	6	10
TCGA-67-6215	7	6	5	8	4	9	10	3	2	1
TCGA-67-6216	7	1	1	1	7	1	1	1	7	7
TCGA-67-6217	7	9	4	3	6	2	10	1	5	8
TCGA-68-7755	4	7	9	6	1	8	3	5	2	10
TCGA-68-7756	4	10	6	8	2	5	9	3	7	1
TCGA-68-7757	3	9	8	7	10	5	4	2	6	1
TCGA-68-8250	3	2	7	4	10	6	9	5	8	1
TCGA-68-8251	10	2	6	5	7	9	1	8	4	3
TCGA-68-A59J	5	3	7	9	10	8	2	6	4	1
TCGA-69-7760	1	7	8	1	10	6	1	1	9	1
TCGA-69-7761	1	7	2	4	7	4	4	3	7	7
TCGA-69-7763	5	2	5	3	7	4	1	9	7	10
TCGA-69-7764	6	6	5	3	1	2	6	4	6	6
TCGA-69-7765	9	10	5	3	7	8	4	6	2	1
TCGA-69-7973	7	9	3	4	8	6	10	2	5	1
TCGA-69-7974	5	2	4	6	9	10	7	8	3	1
TCGA-69-7978	7	2	8	3	4	1	6	5	9	10
TCGA-69-7979	5	9	6	7	3	2	4	1	8	10
TCGA-69-7980	5	7	4	3	8	6	2	1	9	10
TCGA-69-8253	2	8	9	7	5	4	1	6	3	10
TCGA-69-8254	5	7	7	1	6	3	9	2	4	10
TCGA-69-8255	5	9	8	1	3	2	10	6	7	4
TCGA-69-A59K	7	2	3	6	9	4	5	1	8	10
TCGA-6A-AB49	10	8	6	4	2	3	5	7	1	9
TCGA-6D-AA2E	5	5	4	3	2	1	5	5	5	5
TCGA-70-6722	4	2	9	10	8	7	3	6	1	5
TCGA-70-6723	1	4	7	8	3	9	5	6	2	10
TCGA-71-6725	1	2	3	7	4	8	9	4	4	10
TCGA-71-8520	2	1	5	6	8	7	9	4	3	10
TCGA-73-4658	9	2	10	1	8	4	7	3	5	6
TCGA-73-4659	4	6	7	1	9	2	3	5	10	8
TCGA-73-4662	2	7	8	5	10	4	6	3	9	1
TCGA-73-4666	7	9	6	3	5	2	1	4	8	10
TCGA-73-4668	5	2	8	9	3	7	6	10	1	4
TCGA-73-4670	3	5	7	10	9	8	2	1	6	4
TCGA-73-4675	7	1	2	6	4	5	9	8	3	10
TCGA-73-4676	4	2	7	6	10	8	2	5	9	1
TCGA-73-4677	8	10	7	9	2	4	3	5	6	1
TCGA-73-7498	9	5	3	4	1	6	7	8	1	10
TCGA-73-7499	5	9	7	8	6	4	3	10	2	1
TCGA-73-A9RS	8	1	4	3	5	2	10	6	7	9
TCGA-74-6573	1	1	8	6	10	1	1	1	9	7
TCGA-74-6575	7	2	3	9	4	6	8	10	5	1
TCGA-74-6577	4	4	4	2	4	1	4	2	4	10
TCGA-74-6578	4	2	7	9	3	10	4	8	4	1
TCGA-74-6581	5	5	1	4	5	3	5	1	5	5
TCGA-74-6584	5	5	3	1	4	1	5	5	5	5
TCGA-75-5122	2	8	4	6	9	7	1	3	5	10
TCGA-75-5125	6	7	8	10	3	9	2	5	4	1
TCGA-75-5126	6	2	4	7	3	1	10	8	5	9
TCGA-75-5146	9	1	6	7	4	5	3	8	2	10
TCGA-75-5147	8	1	6	4	10	5	1	6	9	1
TCGA-75-6203	1	1	1	1	1	1	1	1	1	1
TCGA-75-6205	2	1	4	6	7	2	7	5	7	7
TCGA-75-6206	3	3	8	10	9	2	3	3	3	1
TCGA-75-6207	4	1	2	4	10	4	4	4	9	3
TCGA-75-6211	8	1	9	6	3	5	7	4	2	10
TCGA-75-6212	7	7	7	2	6	5	2	2	1	7
TCGA-75-6214	6	3	4	10	5	8	9	7	2	1
TCGA-75-7025	8	9	3	5	4	6	7	2	1	9
TCGA-75-7027	3	9	5	2	4	7	1	6	8	10
TCGA-75-7030	1	1	1	1	1	1	1	1	9	10
TCGA-75-7031	5	3	6	4	1	2	9	7	8	10
TCGA-76-4925	1	8	6	7	9	1	1	1	10	5
TCGA-76-4926	5	5	2	4	1	3	8	5	8	8
TCGA-76-4928	7	8	9	6	1	2	4	4	3	10
TCGA-76-4929	1	7	1	1	9	8	1	1	10	1
TCGA-76-4931	1	2	2	2	8	6	10	2	9	7
TCGA-76-4932	1	6	4	3	6	5	6	6	1	6
TCGA-76-4934	5	4	8	6	9	7	3	1	10	1
TCGA-76-4935	5	5	4	2	5	3	1	5	5	5
TCGA-76-6191	9	2	5	6	8	7	10	3	4	1
TCGA-76-6192	10	1	3	5	4	5	9	1	8	7
TCGA-76-6193	4	5	10	8	9	6	3	2	7	1
TCGA-76-6280	3	10	4	8	6	7	5	2	9	1
TCGA-76-6282	2	1	5	6	8	7	9	4	3	9
TCGA-76-6283	6	7	8	9	10	1	1	1	5	1
TCGA-76-6285	4	1	6	7	3	5	8	8	2	8
TCGA-76-6286	2	6	5	3	10	4	6	8	1	9
TCGA-76-6656	9	8	7	6	2	3	4	9	4	1
TCGA-76-6657	4	5	6	2	9	3	10	7	8	1
TCGA-76-6660	5	1	7	6	9	8	4	1	10	1
TCGA-76-6661	3	10	7	4	6	1	5	1	7	9
TCGA-76-6662	4	1	6	1	10	6	4	1	9	8
TCGA-76-6663	8	8	5	4	1	3	10	7	2	6
TCGA-76-6664	8	1	1	7	5	6	8	1	10	1
TCGA-77-6842	2	6	5	3	9	7	1	4	10	8
TCGA-77-6843	3	1	8	9	10	7	6	4	5	2
TCGA-77-6844	6	2	10	5	7	4	9	3	7	1
TCGA-77-6845	3	7	1	4	9	5	8	6	10	2
TCGA-77-7138	5	5	5	2	4	3	5	1	5	5
TCGA-77-7139	7	9	5	4	8	6	2	3	10	1
TCGA-77-7140	4	10	9	2	8	7	5	6	1	3
TCGA-77-7141	9	3	6	5	1	4	10	2	8	7
TCGA-77-7142	7	5	8	6	10	4	1	3	9	2
TCGA-77-7335	4	6	8	5	10	7	1	2	9	3
TCGA-77-7337	9	10	8	6	2	7	3	5	4	1
TCGA-77-7338	10	9	2	4	5	7	8	1	6	3
TCGA-77-7463	4	7	6	9	2	10	3	8	5	1
TCGA-77-7465	2	3	4	7	10	8	1	5	6	9
TCGA-77-8007	4	2	3	6	9	6	5	8	10	1
TCGA-77-8008	7	2	6	9	10	5	4	8	3	1
TCGA-77-8009	1	2	4	6	8	9	7	3	5	10
TCGA-77-8128	2	1	7	6	4	5	10	3	8	9
TCGA-77-8130	5	9	6	8	3	4	1	7	10	2
TCGA-77-8131	1	10	6	4	7	8	8	3	2	5
TCGA-77-8133	2	9	10	6	5	3	4	8	7	1
TCGA-77-8136	5	3	6	7	1	2	10	8	9	4
TCGA-77-8138	8	9	6	4	7	2	5	1	10	3
TCGA-77-8139	6	10	5	2	7	4	9	1	8	3
TCGA-77-8140	8	1	3	6	7	4	5	9	10	2
TCGA-77-8143	2	9	5	8	3	7	10	1	6	4
TCGA-77-8144	10	9	8	2	5	6	7	1	4	3
TCGA-77-8145	2	1	9	7	5	8	4	3	6	10
TCGA-77-8148	3	9	5	6	4	2	7	1	8	10
TCGA-77-8150	2	5	6	4	10	7	2	8	9	1
TCGA-77-8153	8	4	5	6	1	3	10	7	2	9
TCGA-77-8154	8	7	3	2	5	4	6	10	9	1
TCGA-77-8156	3	1	2	10	9	6	7	4	8	5
TCGA-77-A5G1	3	8	1	7	6	4	8	5	2	10
TCGA-77-A5G3	3	9	6	4	8	2	10	5	1	7
TCGA-77-A5G6	4	1	2	3	6	8	5	10	7	9
TCGA-77-A5G7	5	4	1	2	8	7	10	3	9	6
TCGA-77-A5G8	2	9	4	5	1	7	8	6	3	10
TCGA-77-A5GA	1	4	8	9	10	6	5	3	7	2
TCGA-77-A5GB	3	4	2	10	6	9	1	5	6	8
TCGA-77-A5GF	2	9	7	6	10	5	4	3	8	1
TCGA-77-A5GH	2	9	8	6	1	5	10	7	3	4
TCGA-78-7145	1	9	7	6	2	4	5	8	3	10
TCGA-78-7146	10	4	3	8	2	9	7	6	5	1
TCGA-78-7147	3	1	4	8	2	10	9	6	5	7
TCGA-78-7148	6	1	5	7	4	8	3	9	2	10
TCGA-78-7149	7	9	5	3	8	6	4	2	1	10
TCGA-78-7150	4	8	10	7	2	6	1	9	3	5
TCGA-78-7152	3	1	8	6	2	7	9	5	4	10
TCGA-78-7153	9	1	2	6	5	4	7	8	3	10
TCGA-78-7154	3	8	7	6	5	2	1	9	10	4
TCGA-78-7155	9	2	5	4	3	7	6	8	10	1
TCGA-78-7156	9	7	1	2	8	3	10	5	6	4
TCGA-78-7158	1	4	8	6	3	5	2	7	9	10
TCGA-78-7159	3	10	8	6	4	5	1	7	2	9
TCGA-78-7160	1	1	10	7	1	6	1	7	1	9
TCGA-78-7161	1	2	3	5	7	8	10	6	9	4
TCGA-78-7162	3	9	8	1	5	7	1	3	5	10
TCGA-78-7163	2	6	2	4	6	1	6	5	6	6
TCGA-78-7166	8	10	3	4	7	5	2	6	1	9
TCGA-78-7167	5	1	6	9	3	8	2	7	3	10
TCGA-78-7220	2	10	4	5	8	6	7	3	9	1
TCGA-78-7535	1	5	4	2	8	3	10	6	8	7
TCGA-78-7536	8	6	7	5	9	4	1	2	3	10
TCGA-78-7537	7	2	6	8	4	5	3	10	1	9
TCGA-78-7539	7	8	5	6	2	1	3	9	4	10
TCGA-78-7540	2	7	9	6	3	8	1	5	3	10
TCGA-78-7542	4	2	3	6	8	7	1	5	9	10
TCGA-78-7633	1	4	2	5	7	6	9	8	3	10
TCGA-78-8640	9	8	6	4	7	3	1	2	5	10
TCGA-78-8648	4	4	1	2	4	2	4	4	4	4
TCGA-78-8655	3	1	7	8	10	9	2	4	5	6
TCGA-78-8660	10	9	7	8	5	6	1	4	2	3
TCGA-78-8662	4	2	3	6	9	7	5	8	10	1
TCGA-79-5596	6	4	5	8	10	7	2	2	9	1
TCGA-80-5607	1	8	9	5	7	6	3	4	2	10
TCGA-80-5608	9	3	5	8	4	6	1	2	10	7
TCGA-80-5611	9	3	6	7	1	5	4	8	2	10
TCGA-81-5910	7	2	5	4	8	6	8	3	8	1
TCGA-81-5911	6	2	2	5	8	7	10	4	9	1
TCGA-83-5908	3	1	8	6	7	4	1	9	5	10
TCGA-85-6175	7	8	2	6	1	3	8	5	4	8
TCGA-85-6560	5	3	6	9	1	8	4	2	10	7
TCGA-85-6561	5	3	6	8	10	7	1	9	4	2
TCGA-85-6798	2	3	6	9	8	10	5	4	7	1
TCGA-85-7696	1	3	7	9	8	6	1	4	10	5
TCGA-85-7697	8	9	7	1	3	6	2	5	4	10
TCGA-85-7698	1	3	9	7	10	6	5	4	8	2
TCGA-85-7699	1	7	4	5	3	6	10	8	2	9
TCGA-85-7710	3	5	2	4	9	8	7	6	10	1
TCGA-85-7843	7	2	3	6	9	5	8	4	10	1
TCGA-85-7844	9	10	3	4	5	6	2	7	8	1
TCGA-85-7950	7	2	10	8	5	3	1	9	4	6
TCGA-85-8048	1	6	3	7	10	8	5	9	2	4
TCGA-85-8049	5	10	9	7	1	6	2	8	3	4
TCGA-85-8052	1	7	4	5	10	8	1	6	9	1
TCGA-85-8070	2	5	6	7	9	3	1	4	10	8
TCGA-85-8071	4	6	5	7	1	3	8	9	2	10
TCGA-85-8072	4	8	7	9	1	6	3	5	2	10
TCGA-85-8276	6	8	5	4	1	3	7	9	2	10
TCGA-85-8277	6	1	8	7	9	4	2	5	10	3
TCGA-85-8287	7	8	2	3	5	4	1	6	10	9
TCGA-85-8288	7	9	6	4	2	3	10	8	5	1
TCGA-85-8350	2	8	6	4	7	5	1	3	10	9
TCGA-85-8351	3	7	6	9	10	8	5	2	4	1
TCGA-85-8352	8	2	4	10	6	5	8	1	7	3
TCGA-85-8353	8	4	7	6	9	5	1	3	10	2
TCGA-85-8354	2	5	6	7	9	8	4	3	10	1
TCGA-85-8355	7	2	4	3	9	8	1	5	10	6
TCGA-85-8479	9	5	7	4	6	3	1	2	8	10
TCGA-85-8481	6	1	3	9	4	5	2	8	7	10
TCGA-85-8580	2	4	1	3	7	5	9	6	10	8
TCGA-85-8582	4	8	3	7	10	9	2	1	6	5
TCGA-85-8584	5	1	2	7	10	9	8	4	6	3
TCGA-85-8664	5	2	7	6	9	8	1	4	10	3
TCGA-85-8666	4	7	5	8	2	6	10	9	3	1
TCGA-85-A4CL	7	6	8	5	9	3	1	2	4	10
TCGA-85-A4CN	5	8	4	3	9	6	10	2	1	7
TCGA-85-A4JB	4	1	2	7	8	3	5	6	10	9
TCGA-85-A4JC	4	2	7	6	10	8	1	5	9	3
TCGA-85-A4PA	1	1	1	1	1	1	1	1	1	1
TCGA-85-A4QQ	10	4	5	6	9	7	1	3	8	2
TCGA-85-A4QR	4	7	8	6	9	5	2	3	10	1
TCGA-85-A50M	3	4	8	7	9	6	1	5	9	1
TCGA-85-A50Z	10	7	8	5	9	4	1	2	3	6
TCGA-85-A510	7	3	8	9	4	6	1	10	5	1
TCGA-85-A511	4	1	8	6	10	5	2	7	3	9
TCGA-85-A512	9	4	5	2	3	1	10	7	8	6
TCGA-85-A513	2	6	5	3	7	3	7	1	7	7
TCGA-85-A53L	10	2	9	4	7	8	1	6	5	3
TCGA-85-A5B5	3	2	9	8	10	7	5	4	6	1
TCGA-86-6562	6	9	5	3	6	2	4	1	6	9
TCGA-86-6851	3	4	10	7	8	6	1	5	9	2
TCGA-86-7701	1	2	6	10	4	7	5	8	9	3
TCGA-86-7711	8	10	9	5	2	4	6	7	3	1
TCGA-86-7713	8	2	3	5	9	7	6	4	10	1
TCGA-86-7714	6	8	9	5	3	4	1	7	2	10
TCGA-86-7953	7	2	9	3	4	1	4	8	6	10
TCGA-86-7954	2	4	5	7	10	9	1	6	8	3
TCGA-86-7955	10	7	3	9	4	8	6	5	1	2
TCGA-86-8054	2	4	6	1	8	3	10	7	9	5
TCGA-86-8055	2	1	6	2	8	2	7	2	8	10
TCGA-86-8056	9	3	4	6	5	8	2	7	10	1
TCGA-86-8073	8	1	4	10	3	5	6	9	7	2
TCGA-86-8074	1	4	6	7	9	8	5	1	10	1
TCGA-86-8075	2	2	6	6	9	6	5	4	9	1
TCGA-86-8076	2	2	7	8	1	6	9	4	5	10
TCGA-86-8278	7	6	1	4	9	3	5	8	9	2
TCGA-86-8279	4	10	7	6	8	3	1	2	9	5
TCGA-86-8280	2	7	10	9	5	8	2	4	5	1
TCGA-86-8281	1	8	7	6	5	3	4	9	2	10
TCGA-86-8358	1	4	7	6	5	8	9	2	3	10
TCGA-86-8359	10	2	2	4	9	6	7	7	5	1
TCGA-86-8585	7	3	1	6	5	4	10	8	2	9
TCGA-86-8668	1	1	3	3	9	3	7	3	9	8
TCGA-86-8669	1	7	3	5	2	6	8	4	9	10
TCGA-86-8671	4	8	6	1	9	5	1	1	7	10
TCGA-86-8672	1	4	2	5	9	7	6	10	8	3
TCGA-86-8673	2	4	5	6	3	8	1	9	7	10
TCGA-86-8674	4	6	7	3	1	5	10	8	2	9
TCGA-86-A456	5	1	6	4	7	8	2	9	3	10
TCGA-86-A4JF	5	2	3	7	4	8	9	6	1	10
TCGA-86-A4P7	6	10	5	4	1	2	8	7	3	9
TCGA-87-5896	2	8	4	6	2	6	8	8	1	5
TCGA-90-7766	3	8	2	7	5	4	6	1	9	10
TCGA-90-7767	2	5	9	6	10	7	1	2	8	4
TCGA-90-7769	8	10	9	5	7	4	2	1	3	6
TCGA-90-7964	4	2	6	3	10	8	9	7	5	1
TCGA-90-A4ED	3	10	5	7	2	6	9	8	4	1
TCGA-90-A4EE	2	10	8	9	3	7	4	1	5	6
TCGA-90-A59Q	1	2	3	5	9	7	8	6	4	10
TCGA-91-6828	6	3	8	9	5	7	2	1	4	10
TCGA-91-6829	1	6	5	3	8	2	10	7	9	4
TCGA-91-6830	9	10	7	6	5	2	1	4	3	8
TCGA-91-6831	10	8	6	5	7	3	4	2	9	1
TCGA-91-6835	8	2	8	3	7	6	1	5	4	10
TCGA-91-6836	5	1	9	8	6	7	4	3	10	2
TCGA-91-6840	2	1	5	6	9	8	4	7	10	3
TCGA-91-6847	1	4	5	8	9	7	1	3	9	5
TCGA-91-6848	7	9	6	2	4	3	5	8	1	10
TCGA-91-6849	2	1	3	4	5	7	9	8	6	9
TCGA-91-7771	8	1	5	7	4	6	10	3	2	9
TCGA-91-8496	8	6	6	1	4	1	8	1	4	8
TCGA-91-8497	4	4	1	6	8	6	2	3	8	8
TCGA-91-8499	9	6	3	5	10	7	2	4	8	1
TCGA-91-A4BC	2	1	8	6	9	4	5	3	10	7
TCGA-91-A4BD	5	1	5	5	2	2	8	8	2	8
TCGA-92-7340	5	9	4	1	7	3	8	2	6	10
TCGA-92-7341	2	1	8	6	9	7	2	5	10	2
TCGA-92-8063	7	8	4	3	6	1	5	2	9	10
TCGA-92-8064	4	10	5	7	1	3	9	8	2	6
TCGA-92-8065	5	6	4	1	9	2	8	3	7	10
TCGA-93-7347	9	7	8	6	2	4	1	10	5	3
TCGA-93-7348	2	4	3	5	7	6	1	8	9	10
TCGA-93-8067	6	3	5	10	4	7	2	1	8	9
TCGA-93-A4JN	1	3	8	6	7	5	1	8	10	3
TCGA-93-A4JO	4	3	6	7	1	7	5	9	2	10
TCGA-93-A4JP	3	5	7	8	6	9	1	3	10	2
TCGA-93-A4JQ	5	9	4	3	6	2	7	10	1	7
TCGA-94-7033	4	8	7	6	1	3	9	2	5	10
TCGA-94-7557	9	3	1	2	5	5	8	4	7	9
TCGA-94-7943	4	3	2	9	5	8	1	6	10	7
TCGA-94-8035	4	8	3	1	6	2	5	9	10	7
TCGA-94-8490	4	3	6	5	2	8	10	7	9	1
TCGA-94-8491	10	5	9	6	7	8	1	3	4	2
TCGA-94-A4VJ	1	5	2	3	8	4	10	6	9	7
TCGA-94-A5I4	1	5	8	4	7	3	2	10	6	9
TCGA-94-A5I6	7	3	10	8	4	5	9	1	6	2
TCGA-95-7039	3	1	5	9	7	4	6	8	10	2
TCGA-95-7043	3	2	10	4	7	6	9	5	8	1
TCGA-95-7562	2	1	4	9	3	10	7	8	6	5
TCGA-95-7567	6	2	9	7	10	8	1	5	4	3
TCGA-95-7944	5	1	7	6	10	2	3	8	9	4
TCGA-95-7947	9	6	7	8	1	3	10	4	2	5
TCGA-95-7948	1	3	4	2	8	7	6	5	9	10
TCGA-95-8039	7	4	8	9	1	3	4	10	1	4
TCGA-95-8494	1	4	7	8	9	5	3	6	9	2
TCGA-95-A4VK	3	9	4	2	7	1	8	6	10	5
TCGA-95-A4VN	4	2	6	5	10	8	3	7	9	1
TCGA-95-A4VP	9	4	8	3	10	7	1	2	5	6
TCGA-96-7544	2	9	10	5	8	7	4	6	3	1
TCGA-96-7545	1	2	4	8	5	6	3	7	10	9
[truncated: 7,486 more rows]

## Sheet: Supp_table_7_VAF_patient_PCAWG
patient_id	angiogenesis	death	growth	immortality	immune evasion	inflammation	metabolism	metastasis	proliferation	Genome Instability
SP2799	0.349833	0.349833	0.3581	0.3581	0.31552	0.3448	0.41665	0.322325	0.335067	0
SP116686	0.148954	0.17218	0.137592	0.1905	0.137592	0.146212	0.2013	0.167176	0.165645	0
SP80615	0.262552	0.256673	0.262149	0.270355	0.256345	0.263373	0.250273	0.258909	0.25501	0.26796
SP111092	0.479888	0.488224	0.62885	0.575133	0.3659	0.3363	0.416098	0.444327	0.517866	0.6234
SP115501	0.219533	0.225617	0.388325	0.437125	0.2218	0.289475	0.3019	0.319744	0.3363	0
SP19670	0.45885	0.380738	0.371457	0.35218	0.361325	0.451125	0.3492	0.375825	0.35484	0.3922
SP17905	0.164156	0.169121	0.162249	0.166018	0.166241	0.169609	0.160877	0.164023	0.164391	0.162096
SP26709	0	0.3704	0.5	0	0.2121	0	0.38515	0.5	0.38515	0.39105
SP98867	0.4061	0.40745	0.4061	0.3647	0.40285	0.4186	0.44795	0.420729	0.377209	0.3871
SP82532	0.400274	0.370084	0.324866	0.385154	0.372967	0.349516	0.433066	0.378422	0.373896	0.329809
SP34452	0.268367	0.289667	0.2859	0.29625	0.265	0.265	0.28	0.255245	0.250667	0.2128
SP98053	0.4129	0.40803	0.501967	0.54305	0.3111	0.37465	0.4035	0.451678	0.43643	0
SP21400	0.207283	0.20601	0.210051	0.195991	0.214132	0.209098	0.200972	0.202856	0.204147	0.216029
SP124462	0.321235	0.33206	0.315395	0.3571	0.330395	0.364514	0.277943	0.344392	0.339044	0.3462
SP102957	0.248267	0.198983	0.16155	0.2374	0.19135	0.205088	0.2225	0.260567	0.215857	0.18875
SP25518	0.4342	0.463725	0.5	0.5	0.499833	0.50975	0.5	0.5	0.442633	0.5
SP117017	0.3596	0.330467	0.38315	0.38315	0.3291	0.3291	0.3424	0.388767	0.3543	0.302467
SP111173	0.26602	0.23185	0.233883	0.24746	0.194492	0.211133	0.26388	0.2279	0.243258	0.2466
SP111070	0.31165	0.442267	0.3601	0.304025	0.30145	0.30145	0.36554	0.38295	0.361755	0.2323
SP103065	0.261533	0.274117	0.23975	0.1778	0.3415	0.3415	0.33815	0.256717	0.264975	0.4237
SP101795	0.255425	0.231687	0.2552	0.5294	0.166267	0.172	0.305375	0.21373	0.204558	0.4226
SP116375	0.228833	0.2877	0.2743	0.2965	0.20655	0.20655	0.40765	0.237033	0.228833	0.28875
SP82445	0.319757	0.343316	0.331808	0.347606	0.320426	0.328578	0.349404	0.338545	0.342025	0.324241
SP124454	0.351236	0.357637	0.315167	0.2808	0.376605	0.380919	0.371986	0.361233	0.354608	0.35415
SP83312	0.3405	0.346096	0.356725	0.34342	0.321543	0.286627	0.37696	0.342831	0.355004	0.1633
SP124298	0.325165	0.347475	0.328101	0.340964	0.358318	0.32391	0.327154	0.342488	0.340135	0.338821
SP98909	0.53505	0.4764	0.453625	0.471733	0.46154	0.46825	0.448329	0.49915	0.49425	0.43345
SP124431	0.24465	0.238438	0.227239	0.27598	0.274779	0.312194	0.28141	0.25296	0.238818	0.31248
SP124409	0.355255	0.345636	0.365206	0.346471	0.355017	0.364287	0.311731	0.349888	0.361209	0.382233
SP107150	0.2423	0.25715	0.24525	0.24525	0.1905	0.3016	0.1984	0.30308	0.22035	0.33715
SP124439	0.428829	0.446922	0.485262	0.449487	0.485341	0.445825	0.401846	0.452774	0.453729	0.53245
SP124415	0.377402	0.407501	0.405632	0.380522	0.379358	0.369756	0.428438	0.409642	0.408938	0.403555
SP82644	0.366659	0.343659	0.341144	0.3769	0.309385	0.298192	0.3025	0.335606	0.335131	0.303578
SP18946	0.260047	0.27507	0.253428	0.261332	0.29762	0.269243	0.254919	0.269045	0.271611	0.285534
SP58245	0.305467	0.333628	0.411927	0.295843	0.241915	0.26223	0.296833	0.285664	0.305665	0.2839
SP124401	0.475622	0.51741	0.49619	0.460105	0.529196	0.490488	0.450866	0.523289	0.511023	0.4876
SP104056	0.39426	0.390455	0.413423	0.366419	0.37038	0.369946	0.380728	0.385954	0.379727	0.423409
SP101610	0.3274	0.3411	0.3871	0.3871	0	0.2951	0.3871	0.34355	0.34355	0.3871
SP111129	0.2931	0.32905	0.2963	0.2963	0	0	0	0.311875	0.3298	0
SP70226	0.3228	0.22705	0.1774	0.1774	0.3393	0	0.340267	0.298733	0.233639	0
SP83019	0.287638	0.303195	0.338275	0.253379	0.286604	0.26845	0.347858	0.296019	0.301858	0.290625
SP124447	0.481972	0.498292	0.531064	0.49361	0.506844	0.498222	0.475309	0.506272	0.500756	0.50639
SP83146	0.264988	0.266481	0.282337	0.283089	0.258655	0.256597	0.260973	0.268586	0.274047	0.245619
SP124369	0.466894	0.482392	0.474687	0.420563	0.473643	0.437613	0.446804	0.479583	0.49152	0.566629
SP89909	0.1831	0.203407	0.217033	0.222513	0.194144	0.178614	0.212282	0.21448	0.21349	0.218057
SP124364	0.326822	0.298988	0.319894	0.335993	0.28826	0.291268	0.276394	0.301697	0.304651	0.253825
SP57189	0.349719	0.372832	0.377579	0.368538	0.396637	0.380498	0.406746	0.405603	0.380301	0.362
SP124452	0.373389	0.413091	0.396923	0.30755	0.390875	0.366806	0.450795	0.37544	0.39734	0.478645
SP111001	0.336133	0.260401	0.278586	0.3617	0.382983	0.385183	0.32348	0.314069	0.239588	0.4017
SP9930	0.2108	0.242856	0.328067	0.262533	0.1515	0.15694	0.2618	0.231771	0.227593	0.3452
SP96136	0.342875	0.341089	0.3512	0.333992	0.279343	0.327123	0.375981	0.330051	0.344779	0.45894
SP25494	0.0850091	0.0909013	0.0962085	0.0968903	0.0896453	0.0965325	0.0936121	0.0892437	0.0898062	0.121296
SP7692	0.3056	0.224275	0.267537	0.401333	0.344286	0.176671	0.198233	0.278692	0.283358	0.23645
SP125778	0.313063	0.444257	0.419733	0.41644	0.362858	0.36795	0.344733	0.406614	0.348056	0.5285
SP82900	0.501441	0.438418	0.459829	0.478163	0.447452	0.455625	0.458052	0.46223	0.462711	0.373846
SP124377	0.190635	0.203036	0.218715	0.182075	0.202883	0.19295	0.20947	0.204933	0.20325	0.16256
SP28659	0.392217	0.381743	0.40828	0.28325	0.2462	0.2414	0.534233	0.399667	0.352222	0.272167
SP124444	0.49296	0.48494	0.494	0.4865	0.472683	0.479117	0.64984	0.603975	0.553044	0.7555
SP103894	0.464933	0.417918	0.444448	0.458059	0.458871	0.480737	0.37476	0.439377	0.440135	0.45498
SP86425	0.3306	0.4011	0.11	0	0.332425	0.315033	0.4839	0.23806	0.31984	0
SP90503	0.66535	0.57095	0.611833	0.611833	0.4483	0.4483	0.499425	0.48245	0.48245	0.8824
SP98090	0.19765	0.193763	0.2092	0.230325	0.182181	0.172687	0.190533	0.215024	0.202158	0.2568
SP56607	0.21355	0.173225	0.14695	0.164967	0.18592	0.1832	0.17118	0.172877	0.141282	0.2288
SP124428	0.494863	0.443368	0.522843	0.50015	0.481287	0.469723	0.438371	0.477492	0.477567	0.483471
SP57941	0.621962	0.462541	0.479144	0.512878	0.556142	0.520887	0.45965	0.492529	0.463213	0.411825
SP107052	0.1071	0.1701	0.1071	0	0.2524	0.27065	0.1071	0.210571	0.1666	0.1071
SP101740	0.453917	0.379471	0.3897	0.5314	0.294075	0.300867	0.52126	0.329016	0.340447	0.455055
SP97104	0.2035	0.1938	0.292333	0.3058	0.233167	0.2881	0.2804	0.286725	0.24906	0.2113
SP124326	0.423992	0.410248	0.37645	0.50278	0.431822	0.416963	0.477825	0.391196	0.418819	0.399633
SP82417	0.206665	0.193087	0.201072	0.201529	0.216583	0.199953	0.222158	0.198483	0.201201	0.204864
SP31422	0.302333	0.291633	0.3177	0.243386	0.287775	0.2804	0.250143	0.245792	0.294293	0
SP70313	0.18742	0.20005	0.1689	0.23515	0.201125	0.230375	0.196567	0.173822	0.165989	0.2449
SP49124	0.331475	0.285294	0.301045	0.294438	0.32172	0.319225	0.275357	0.280959	0.298714	0.35935
SP124382	0.259966	0.261549	0.260062	0.211162	0.25438	0.255387	0.26146	0.253041	0.251792	0.274775
SP110845	0.116867	0.171175	0.137175	0.06505	0.10322	0.10756	0.13205	0.124808	0.132967	0
SP18121	0.210006	0.196063	0.204984	0.177047	0.203926	0.192329	0.192364	0.197854	0.200449	0.15779
SP107012	0.326546	0.366375	0.338569	0.351729	0.380335	0.35605	0.400969	0.352162	0.350536	0.3417
SP69565	0.338025	0.2689	0.301375	0.28684	0.452133	0.289033	0.45475	0.30265	0.30659	0.300933
SP84743	0.420811	0.362922	0.343314	0.424022	0.304655	0.35614	0.35793	0.315705	0.281708	0.387333
SP16886	0.27318	0.255954	0.267594	0.28198	0.285265	0.278587	0.260379	0.2652	0.263646	0.244624
SP116948	0.4359	0.296767	0.6218	0.325	0.40535	0.5091	0.3232	0.453125	0.444775	0
SP135182	0.343029	0.345364	0.303733	0.35878	0.252086	0.291157	0.373425	0.270033	0.27433	0.3672
SP124399	0.494304	0.472221	0.48367	0.59155	0.429963	0.406774	0.412988	0.434415	0.460701	0.275767
SP118043	0.5015	0.5995	0.7692	0.7692	0.277733	0.27235	0.45385	0.4201	0.4201	0
SP96122	0.197127	0.1828	0.182619	0.20887	0.182462	0.20372	0.200071	0.183143	0.171675	0
SP82461	0.38495	0.367062	0.444328	0.361725	0.464408	0.548543	0.37425	0.477503	0.440937	0.48595
SP59380	0.1515	0.244333	0.2693	0.2693	0.18685	0.1515	0.2693	0.244333	0.2693	0.2
SP59803	0.886	0.4911	0.4492	0.886	0.1256	0.1667	0.3779	0.352	0.444725	0.521
SP83844	0.44384	0.403171	0.379762	0.470729	0.377742	0.44404	0.443688	0.409922	0.410093	0.3926
SP22031	0.272159	0.265583	0.25352	0.249014	0.248895	0.255968	0.260148	0.254651	0.262552	0.257695
SP102547	0.3226	0.725	0.3226	0.3226	0.283	0	0	0.5238	0.5238	0
SP124396	0.555329	0.479636	0.60775	0.546533	0.492525	0.381443	0.3575	0.461036	0.480456	0.6552
SP103866	0.449781	0.488279	0.497445	0.4993	0.488107	0.457522	0.5301	0.483998	0.483294	0.468578
SP70122	0.374833	0.305575	0.351875	0.374833	0.3134	0.3134	0.323975	0.32696	0.329067	0.3111
SP112265	0.2083	0.439	0.2791	0.357333	0.3029	0.2958	0	0.311983	0.317867	0
SP58882	0.43845	0.3886	0.3643	0.300633	0.413033	0.2287	0.489033	0.35832	0.3418	0.5066
SP57586	0.255989	0.220724	0.2151	0.141675	0.208314	0.251287	0.178671	0.198783	0.231789	0.18225
SP110789	0.231333	0.21586	0.166467	0.2576	0.2538	0.2234	0.1885	0.205171	0.241057	0.1321
SP112165	0.52	0.365325	0.3019	0.3019	0.2632	0.2632	0.52	0.365325	0.35892	0.4191
SP111014	0.164467	0.123367	0.15765	0.126075	0.087	0	0.15765	0.11755	0.126057	0.15765
SP107146	0.4765	0.477	0.557375	0.62745	0.632775	0.420933	0.6667	0.554917	0.550171	0.42065
SP110853	0.120867	0.145313	0.1622	0.109367	0.135233	0.126243	0.18156	0.112533	0.138167	0.1449
SP82431	0.351595	0.342038	0.333949	0.312872	0.360942	0.353421	0.33035	0.334964	0.328645	0.3004
SP92364	0.366085	0.374258	0.388205	0.385562	0.362563	0.369646	0.350919	0.355244	0.360499	0.373563
SP102897	0.245762	0.284115	0.270907	0.289625	0.272587	0.277633	0.342738	0.278125	0.289587	0.34795
SP82459	0.23471	0.210676	0.202413	0.2207	0.221595	0.199911	0.231977	0.195629	0.210543	0.222333
SP49379	0.168425	0.180914	0.18005	0.17462	0.222033	0.216325	0.164014	0.17925	0.200108	0.1455
SP1059	0.19225	0.235843	0.281382	0.307425	0.304936	0.28191	0.316508	0.253338	0.257631	0.1616
SP68725	0.79235	0.698767	0.698767	0.79235	0.5116	0.446333	0.65055	0.62825	0.698767	0.7059
SP30185	0.14	0.206833	0.1481	0.14	0.1481	0.1975	0.14	0.1481	0.1481	0.093
SP124425	0.1034	0.106747	0.109823	0.0992	0.107971	0.125112	0.117508	0.102477	0.102623	0.09995
SP99325	0.424304	0.43152	0.424726	0.437425	0.405471	0.409167	0.417182	0.429017	0.433977	0.407278
SP111069	0.285225	0.276122	0.252771	0.226717	0.2435	0.28894	0.253525	0.25259	0.2588	0.2257
SP121837	0.225	0.316767	0.39375	0	0.5625	0.1628	0.225	0.316767	0.39375	0.2125
SP82399	0.42839	0.383621	0.357107	0.37052	0.470457	0.432287	0.450978	0.428565	0.409831	0.382983
SP127634	0.41315	0.35584	0.389211	0.31068	0.401371	0.40817	0.35442	0.394921	0.386284	0
SP57629	0.46646	0.463556	0.51	0.5151	0.283575	0.419225	0.48638	0.462683	0.466058	0.530333
SP96110	0.380475	0.372723	0.326587	0.331167	0.3696	0.34856	0.478812	0.350242	0.376295	0
SP124458	0.517243	0.481314	0.442405	0.4291	0.514434	0.443095	0.508622	0.444812	0.480375	0.4244
SP9816	0.2	0.2454	0.2612	0.20715	0	0.1778	0.2	0.23314	0.2893	0.2102
SP57619	0.265989	0.236382	0.275545	0.360175	0.296055	0.267115	0.288614	0.267628	0.254663	0.244633
SP107369	0.4967	0.5469	0.4688	0.625	0.6213	0.625	0.625	0.5218	0.52178	0
SP124384	0.374862	0.336427	0.383258	0.335433	0.356445	0.381532	0.357498	0.369733	0.342509	0.400864
SP31814	0.311567	0.23956	0.37812	0.35195	0.219575	0.182267	0.25175	0.345925	0.326033	0.4658
SP66687	0.54115	0.807425	0.7661	0.7661	0.613725	0.8919	0.7661	0.70378	0.70378	0.7931
SP83083	0.445733	0.411218	0.40559	0.4954	0.435042	0.456908	0.443086	0.391545	0.387261	0.3447
SP111114	0.426714	0.363085	0.339771	0.415525	0.3204	0.3327	0.4213	0.337346	0.358362	0.3542
SP52667	0.34244	0.391005	0.321523	0.2809	0.3808	0.3583	0.43474	0.341812	0.363787	0.361567
SP135288	0.264562	0.296862	0.227822	0.253133	0.42635	0.385817	0.244283	0.300914	0.257365	0.361475
SP953	0.40261	0.4415	0.36636	0.374	0.429089	0.41773	0.462429	0.424485	0.3769	0.5394
SP57450	0.534467	0.406611	0.423567	0.313487	0.157575	0.425667	0.399933	0.378123	0.386525	0.7959
SP111089	0.3793	0.232333	0.248067	0.3073	0.1316	0.186033	0.3793	0.203286	0.21406	0.232
SP85130	0.51085	0.523833	0.77455	0.89585	0.4629	0.484125	0.622	0.668371	0.5906	0.9455
SP110849	0.260483	0.22849	0.194144	0.21292	0.1944	0.19755	0.23425	0.221315	0.211935	0.20555
SP43532	0.29825	0.403	0	0.403	0.3281	0	0.3333	0.1935	0.3115	0.3265
SP1365	0.663633	0.342329	0.419333	0.463267	0.24585	0.2667	0.4026	0.4859	0.36957	0.8611
SP103045	0	0.2306	0.2222	0	0	0.201367	0.2449	0.1562	0.208333	0
SP77972	0.1897	0.208367	0.123567	0.2029	0.2029	0.1833	0.1774	0.15294	0.14536	0
SP59304	0.34358	0.313996	0.28523	0.4348	0.3128	0.320337	0.323438	0.328454	0.30908	0.243
SP117354	0.34555	0.34555	0.350733	0.3929	0.34555	0.34555	0.3929	0.34555	0.306767	0
SP117919	0.42195	0.324567	0.36345	0.465367	0.28215	0.4137	0.3973	0.354945	0.377891	0.458967
SP124394	0.469556	0.461545	0.501056	0.69105	0.503881	0.60485	0.443345	0.524418	0.534263	0.5128
SP111031	0.466567	0.353335	0.45602	0.6034	0.2942	0.308243	0.391937	0.378727	0.341406	0.518067
SP92460	0.260912	0.27833	0.2823	0.21795	0.23935	0.218237	0.330622	0.287965	0.2759	0.3405
SP71950	0.36565	0.31935	0.38332	0.380375	0.300275	0.2056	0.30864	0.310164	0.348736	0.325
SP1677	0.30692	0.389126	0.44048	0.56636	0.30924	0.3077	0.439223	0.388413	0.394903	0.319667
SP67428	0.664633	0.49512	0.49224	0.4124	0.1615	0.1615	0.683633	0.412733	0.425333	0.8125
SP110865	0.198183	0.143244	0.238529	0.191383	0.178543	0.143863	0.2134	0.176382	0.189885	0.37115
SP82988	0.36185	0.33595	0.340015	0.35366	0.36846	0.393091	0.37127	0.415369	0.36964	0.3512
SP85379	0.5598	0.428475	0.3111	0.4584	0.336167	0.351833	0.301667	0.326533	0.43685	0.7342
SP80657	0.19785	0.2192	0.202813	0.20042	0.21088	0.175767	0.233583	0.2024	0.201364	0.2647
SP17430	0.2547	0.37605	0.36778	0.37676	0.1646	0.2198	0.48965	0.360333	0.351089	0.6
SP125811	0.1693	0.1553	0.1693	0.1693	0.151467	0.145425	0.16925	0.15825	0.162525	0.1786
SP124386	0.485588	0.439611	0.446506	0.430778	0.473511	0.436679	0.526773	0.419433	0.425992	0.3685
SP65376	0.257378	0.261062	0.2273	0.3002	0.247525	0.227283	0.291567	0.251207	0.29091	0.359033
SP112991	0	0.2174	0.3636	0.20775	0.325	0.3198	0	0.3929	0.3636	0
SP84439	0.17986	0.17226	0.169399	0.179273	0.164127	0.167759	0.184447	0.170574	0.171669	0.172712
SP116596	0.5169	0.53578	0.5169	0.5169	0.2338	0	0.5169	0.410917	0.33882	0.8
SP2293	0.29195	0.230223	0.254736	0.27465	0.244425	0.264539	0.248143	0.248787	0.246963	0.26275
SP90245	0.603333	0.39715	0.357443	0.511767	0.4114	0.289239	0.40765	0.406667	0.46109	0.342675
SP22750	0.382	0.36267	0.366811	0.39638	0.2693	0.335125	0.3766	0.405538	0.360638	0
SP116839	0	0	0.1228	0	0.4444	0.4444	0.6087	0.2698	0.1228	0
SP124334	0.152958	0.154169	0.181732	0.175313	0.149915	0.169808	0.154587	0.157449	0.153113	0.08618
SP19295	0.348159	0.348073	0.369508	0.357616	0.356736	0.358625	0.361597	0.350757	0.343091	0.23634
SP11171	0.2	0.18695	0.1625	0.18695	0.2885	0.2733	0.18695	0.20682	0.164975	0.2
SP116273	0	0	0	0	0.193033	0.26	0.2727	0.2209	0.1818	0
SP56168	0.123887	0.130529	0.139282	0.17002	0.13656	0.156167	0.1275	0.139365	0.124969	0.1111
SP30077	0.333657	0.329508	0.33442	0.244083	0.26722	0.27868	0.278	0.282919	0.237235	0.5194
SP124380	0.37297	0.392227	0.402633	0.372967	0.36425	0.367009	0.454974	0.374561	0.374275	0.470633
SP55235	0.203626	0.22498	0.235889	0.193133	0.199708	0.180086	0.25363	0.188897	0.201829	0.3261
SP59938	0.415467	0.47158	0.562675	0.8025	0.44095	0.1961	0.8025	0.458843	0.438971	0.84125
SP135420	0.383433	0.26098	0.320689	0.391617	0.3668	0.30476	0.235025	0.305986	0.321185	0.36995
SP107403	0.232533	0.239933	0.2083	0	0.257367	0.3608	0	0.193933	0.22562	0.2222
SP53810	0.234335	0.221445	0.238077	0.226142	0.207977	0.216812	0.250117	0.228462	0.221473	0.193808
SP116697	0.265911	0.24594	0.251098	0.3145	0.291119	0.266826	0.233596	0.258309	0.247821	0.2116
SP116341	0.2228	0.225217	0.246433	0.250075	0.28885	0.3333	0.25606	0.231033	0.21793	0.3125
SP117887	0.237333	0.2986	0.3699	0.3699	0.2764	0.3101	0.24235	0.234186	0.23502	0
SP107071	0.378333	0.372243	0.3222	0.3781	0.216033	0.323314	0.2589	0.339829	0.3987	0
SP5393	0.4749	0.31872	0.6521	0.3468	0.282233	0.2369	0.3468	0.292271	0.34665	0.5769
SP117932	0.21605	0.19875	0.24525	0.164467	0.158533	0.17206	0.256367	0.213042	0.216236	0.19784
SP124264	0	0.378033	0.37955	0	0	0.352	0.37955	0.3004	0.232	0.5333
SP99189	0	0.1664	0.1429	0.15895	0.175	0.1158	0.1212	0.140511	0.1593	0
SP124319	0.221579	0.220611	0.232789	0.21325	0.210524	0.2083	0.234366	0.229296	0.23214	0.256473
SP82780	0.730775	0.589163	0.6824	0.6951	0.6951	0.564129	0.64355	0.611022	0.648825	0.398583
SP98933	0.2857	0.38795	0.4902	0	0.264525	0.226233	0.12825	0.226233	0.352267	0
SP111113	0.32862	0.251863	0.2617	0.2507	0.320308	0.244038	0.281325	0.289259	0.279662	0.31595
SP98991	0	0.3077	0.45095	0.3409	0.561	0	0.3409	0.3953	0.36624	0.8
SP124333	0.38445	0.39502	0.474783	0.49022	0.38072	0.39615	0.44844	0.379311	0.384744	0.37695
SP115498	0.19745	0.232417	0.2445	0.2235	0.4308	0.3469	0.152375	0.30595	0.293731	0.1667
SP98845	0.437767	0.380095	0.410357	0.4268	0.389656	0.393782	0.464463	0.397204	0.433822	0.44
SP124449	0.55793	0.478707	0.44296	0.402467	0.476479	0.473866	0.471756	0.47963	0.500163	0.616217
SP84790	0.1544	0.163423	0.18115	0.17925	0.103983	0.121044	0.13435	0.153741	0.156383	0.168633
SP112211	0.277325	0.411	0.2781	0.287133	0.4303	0.31365	0.350817	0.4425	0.370362	0.361525
SP125695	0.8439	0.48275	0.5549	0.57932	0.625	0.48555	0.662375	0.48275	0.430843	0.8387
SP58342	0.341069	0.326386	0.334035	0.39529	0.301138	0.301857	0.358743	0.341947	0.323616	0.4306
SP23500	0.207	0.17474	0.181625	0.2447	0.140667	0.147033	0.184675	0.156638	0.167686	0.3294
SP116496	0.27785	0.246613	0.28436	0.267667	0.237886	0.178971	0.26305	0.2276	0.266025	0.266967
SP124197	0.606225	0.4567	0.475286	0.4818	0.52802	0.468614	0.527867	0.47481	0.441581	0.438167
SP124362	0.510414	0.446183	0.445464	0.39982	0.467868	0.467918	0.450874	0.465158	0.458592	0.478338
SP124434	0.420565	0.423766	0.362121	0.440079	0.46325	0.418775	0.47119	0.375709	0.362383	0.307975
SP16934	0.4552	0.4552	0.45543	0.439367	0.382675	0.4147	0.4109	0.451645	0.45543	0
SP107467	0	0	0	0	0.3636	0.3636	0	0.3636	0.3636	0
SP77203	0.28594	0.221143	0.270525	0.27134	0.248386	0.268383	0.31574	0.273662	0.233067	0.4011
SP125693	0.69865	0.55254	0.665767	0.665767	0.4941	0.4941	0.56955	0.46874	0.46874	0.9032
SP96129	0.6429	0.372345	0.4671	0.60305	0.4042	0.3735	0.38706	0.4798	0.434837	0.4233
SP116676	0.175053	0.176733	0.171589	0.20096	0.165917	0.173121	0.181133	0.173276	0.180082	0
SP71456	0.205975	0.197967	0.3115	0.28825	0.239125	0.216567	0.237275	0.229137	0.221078	0.16805
SP33496	0.4443	0.323414	0.322787	0.341057	0.394675	0.38547	0.35485	0.328067	0.341438	0.343933
SP98937	0.11975	0.12415	0.1354	0.11975	0.1786	0.1786	0.0816	0.139367	0.169725	0
SP1132	0.370236	0.367486	0.47462	0.457033	0.3465	0.391822	0.444267	0.444163	0.443917	0.913
SP56566	0.361525	0.41163	0.346225	0.3715	0.14055	0.313925	0.449014	0.29675	0.263988	0.35245
SP99041	0.257233	0.2208	0.2479	0.2269	0.25745	0.222133	0.149733	0.363233	0.257611	0.28
SP105375	0.2072	0.214722	0.223625	0.260325	0.158543	0.153867	0.215967	0.205679	0.189569	0.34745
SP59352	0.416567	0.26835	0.301222	0.2658	0.3091	0.180567	0.260075	0.300444	0.300444	0
SP103261	0.1991	0.203871	0.210967	0.23955	0.2172	0.243067	0.219133	0.239083	0.22975	0
SP103245	0.151567	0.25412	0.247333	0.169433	0.3088	0.3323	0.202667	0.239987	0.258727	0.2615
SP32742	0.202367	0.19895	0.146825	0.174175	0.176067	0.176067	0.145467	0.208492	0.211685	0
SP63796	0.45	0.35985	0.3857	0.5	0	0.2308	0.5	0.3899	0.388171	0.5
SP52779	0.350267	0.335064	0.374836	0.404729	0.45576	0.352875	0.41605	0.349224	0.372715	0
SP82614	0.63229	0.55476	0.5139	0.640025	0.534837	0.612344	0.508243	0.587244	0.59938	0.637175
SP111094	0.334275	0.29534	0.2619	0.3359	0.2104	0.154312	0.575	0.232647	0.247153	0.24855
SP106638	0.44205	0.333956	0.34906	0.3973	0.279	0.279	0.4046	0.353345	0.338981	0
SP56533	0.3165	0.24364	0.236075	0.343	0.2174	0.234783	0.3971	0.26379	0.270271	0.3971
SP33688	0.453729	0.42166	0.4741	0.481	0.419857	0.451219	0.418922	0.384974	0.400081	0.4848
SP83482	0.248221	0.252607	0.214072	0.17206	0.237809	0.237056	0.239079	0.218331	0.2278	0.237958
SP124436	0.169903	0.160628	0.162658	0.161624	0.17401	0.169629	0.165222	0.180348	0.171614	0.14065
SP124412	0.15546	0.150279	0.129456	0.13711	0.173256	0.135864	0.147673	0.144212	0.143858	0.13572
SP84392	0.388574	0.366908	0.36813	0.36355	0.368944	0.356293	0.372726	0.365671	0.369686	0.37107
SP115162	0.617	0.380075	0.2282	0.30615	0	0.1845	0.4151	0.37538	0.51605	0
SP23504	0.294425	0.260043	0.2725	0.3141	0.1739	0.14685	0.3286	0.237089	0.2561	0.3163
SP110866	0.3306	0.29182	0.4032	0.34005	0.3309	0.3454	0.4081	0.2536	0.244586	0.23785
SP30803	0.260854	0.274788	0.303592	0.198633	0.199722	0.231733	0.292978	0.277221	0.279108	0.299325
SP79958	0.2037	0.2496	0	0.2857	0	0	0	0.2857	0.261633	0.42705
SP116355	0.15555	0.141433	0.119143	0.15555	0.14165	0.113767	0.14855	0.116329	0.116329	0.1111
SP124353	0.4231	0.4231	0.0549	0	0.26235	0.266867	0.2544	0.277525	0.2625	0
SP102929	0	0.2625	0.25	0	0.4231	0.39675	0.2105	0.258883	0.2779	0
SP101678	0.3411	0.2467	0.419575	0.35555	0.3	0.2581	0.35555	0.24699	0.237536	0.412733
SP115830	0.3751	0.33978	0.4224	0.3485	0.257245	0.257245	0.31155	0.294998	0.304584	0.1231
SP1144	0.55166	0.402327	0.5106	0.5828	0.5283	0.5283	0.658567	0.494455	0.515982	0.643567
SP76001	0.3319	0.3319	0.330825	0.3319	0.3545	0.3972	0.3319	0.30086	0.3319	0.29925
SP1724	0.87545	0.7179	0.635925	0.52975	0.716075	0.5378	0.57472	0.552863	0.683913	0.8889
SP101523	0.7609	0.687425	0.616425	0.75545	0.31435	0.31435	0.7242	0.586989	0.595714	0.7609
SP107152	0.30145	0.343133	0	0	0.17745	0.23765	0.33795	0.31784	0.36825	0.2688
SP98092	0.496567	0.4582	0.4945	0.42505	0.426433	0.38678	0.5431	0.469622	0.504171	0.559
SP98887	0.73245	0.724	0.740233	0.542525	0.6653	0.64945	0.464537	0.601511	0.56444	0.6391
SP56502	0.494683	0.400624	0.33138	0.43485	0.3931	0.384333	0.384075	0.313804	0.32374	0.427767
SP124418	0.395917	0.3245	0.385009	0.234325	0.45	0.515886	0.34233	0.40671	0.390868	0.341187
SP60001	0.46555	0.311629	0.438411	0.438586	0.18255	0.2122	0.404533	0.387037	0.419238	0.6148
SP111096	0.266825	0.24886	0.210486	0.2429	0.12104	0.093	0.3027	0.201987	0.21007	0.6623
SP56474	0.5551	0.35705	0.35458	0.5801	0.1834	0.1834	0.22596	0.319738	0.3117	0.374925
SP30113	0.321367	0.3723	0.410636	0.390511	0.345413	0.34805	0.3226	0.368378	0.402892	0.3267
SP76915	0.5859	0.339344	0.4428	0.493633	0.34854	0.392075	0.34775	0.344183	0.336486	0.4198
SP88098	0	0	0	0	0.4419	0.44715	0	0.4419	0	0
SP57669	0.375467	0.313924	0.3441	0.283471	0.279925	0.261314	0.39	0.311142	0.337308	0.491967
SP71734	0.47806	0.450467	0.4477	0.4815	0.5273	0.41612	0.53595	0.39515	0.367912	0.4193
SP50827	0.4325	0.504686	0.4849	0.508033	0.4558	0.49257	0.40876	0.467844	0.481108	0.44775
SP5052	0.38585	0.212331	0.346775	0.323167	0.28925	0.209	0.286425	0.24309	0.238485	0.264775
SP124389	0.437956	0.472728	0.504808	0.487175	0.562894	0.511164	0.558755	0.477006	0.483496	0.617833
SP56537	0.5514	0.585257	0.56352	0.644	0.523467	0.550525	0.71886	0.585612	0.481273	0.66015
SP114966	0.20035	0.35012	0.308833	0	0.350075	0.327191	0.359	0.377269	0.36271	0
SP125780	0.6624	0.570775	0.524933	0.524933	0.588	0.588	0.524933	0.570775	0.570775	0.8571
SP13084	0	0.400367	0.60145	0.7639	0	0.5341	0.7639	0.527067	0.56085	0
SP112821	0	0.123	0.1176	0	0.1176	0.15	0	0.123	0.123	0
SP35951	0	0.38145	0.2698	0.2394	0	0	0.45835	0.337033	0.320225	0.2698
SP116377	0.72	0.465125	0.783833	0.72	0.308333	0.34396	0.487867	0.432433	0.59685	0.445433
SP116965	0.213817	0.201462	0.198378	0.3366	0.184957	0.1992	0.267986	0.183073	0.194863	0.2288
SP51824	0.280813	0.2694	0.27844	0.2993	0.332344	0.32806	0.327571	0.289535	0.288557	0.2581
SP117124	0.313	0.313	0.2482	0.2482	0.2593	0.2249	0.313	0.233775	0.2482	0.3667
SP112915	0	0.25578	0.294533	0	0	0.1163	0.3286	0.26242	0.26656	0.2286
SP57735	0.332227	0.276733	0.311567	0.24788	0.325867	0.35972	0.36286	0.30004	0.302368	0.328225
SP5017	0.49702	0.462567	0.6301	0.47396	0.3182	0.3182	0.48755	0.49144	0.49144	0.6604
SP99053	0.17545	0.17545	0.13465	0.1667	0.1842	0.1373	0.1703	0.2094	0.228067	0.20555
SP124971	0.392267	0.445743	0.38654	0.40135	0.483933	0.4234	0.48672	0.38625	0.372878	0.4369
SP49114	0.5077	0.48237	0.447957	0.50558	0.414725	0.418975	0.477967	0.460433	0.440075	0.7241
SP111077	0.334783	0.249789	0.31152	0.296922	0.1682	0.209556	0.267729	0.235657	0.231239	0.3965
SP12186	0.324167	0.280757	0.334967	0.38625	0.19622	0.15015	0.340833	0.29726	0.28135	0.5833
SP117983	0.30995	0.2579	0.2778	0.2778	0.342475	0.2778	0.2778	0.23755	0.23755	0
SP50713	0.423933	0.373933	0.323657	0.37515	0.241933	0.20845	0.56	0.3281	0.34668	0.32145
SP125770	0.231727	0.266186	0.250227	0.214175	0.183664	0.21185	0.317208	0.239566	0.24608	0.246275
SP91730	0.5989	0.44925	0.47996	0.642267	0.344475	0.385333	0.683367	0.384982	0.40846	0.4133
SP101700	0.62265	0.574933	0.6897	0.6897	0.3826	0.358	0.6897	0.5925	0.62265	0.6897
SP96120	0.49312	0.41317	0.349856	0.43994	0.441875	0.30565	0.407175	0.360108	0.36035	0.6829
SP125753	0.66345	0.66345	0.66345	0.589367	0.44085	0.4405	0.4405	0.55916	0.5715	0
SP56553	0.286106	0.220332	0.226303	0.198224	0.239104	0.251586	0.22445	0.239006	0.237137	0.248217
SP101580	0.483833	0.42655	0.39416	0.42575	0	0.5	0.4655	0.449233	0.380175	0.4655
SP103300	0	0.3516	0.34465	0	0	0.4154	0	0.3779	0.300733	0
SP50101	0.3368	0.2937	0.3368	0.42335	0.2069	0.2069	0.3368	0.3512	0.3512	0.4667
SP102597	0.1064	0.251233	0.118575	0.137	0.1173	0.0615	0	0.241225	0.18265	0.229
SP99109	0.7857	0.4401	0.43242	0.702267	0.419167	0.3535	0.6034	0.405786	0.359162	0.7857
SP101690	0.372867	0.282114	0.52085	0.52085	0.1976	0.181775	0.40465	0.3202	0.34106	0.44445
SP80216	0.0959	0	0	0	0.0959	0.0959	0	0.0959	0.17495	0
SP103396	0.0952	0.0996	0.0952	0	0.1304	0	0.0952	0.0996	0.11128	0
SP117291	0.48012	0.55876	0.637	0.637	0.6286	0.46354	0.59106	0.540314	0.4322	0.9545
SP17294	0.474922	0.449227	0.569391	0.612	0.378208	0.382279	0.590017	0.433635	0.437874	0.557667
SP4593	0	0.3781	0	0	0	0	0.28	0.22	0.2681	0
SP98955	0.438825	0.486242	0.353167	0.484267	0.370175	0.374771	0.511017	0.424424	0.415293	0.5271
SP117482	0.20905	0.188229	0.160667	0.20075	0.21895	0.172887	0.1631	0.1827	0.177936	0.16725
SP99269	0.1682	0.2	0.234367	0.2	0.16195	0.16195	0.19375	0.22265	0.234367	0.2
SP111086	0.28762	0.205986	0.22711	0.262825	0.15135	0.16795	0.296914	0.213523	0.220337	0.7273
SP92195	0.64075	0.591733	0.591733	0.591733	0.4815	0.1912	0.591733	0.477929	0.45308	0.5228
SP56541	0.439722	0.355485	0.352925	0.403288	0.31605	0.267775	0.40124	0.327137	0.310088	0.6593
SP112819	0	0.3259	0.1667	0	0.25	0.22175	0	0.287233	0.226433	0.3462
SP102096	0.48125	0.3593	0.48125	0.38055	0.25555	0.291567	0.65	0.42486	0.3274	0.65
SP124367	0.253617	0.22357	0.226343	0.22597	0.244973	0.236278	0.240306	0.235344	0.239033	0.217029
SP109470	0.5106	0.458783	0.33825	0.3833	0.3421	0.4203	0	0.496275	0.45865	0
SP58991	0.289256	0.408344	0.467683	0.388025	0.2851	0.319557	0.293367	0.379138	0.423629	0.403733
SP97269	0.416867	0.4153	0.43695	0.3752	0.398167	0.402087	0.43264	0.413321	0.402925	0
SP101642	0.5008	0.38317	0.34528	0.43492	0.309937	0.33475	0.39954	0.332894	0.35654	0.7308
SP78820	0	0.5714	0.5714	0	0	0	0	0.5714	0.5714	0
SP39349	0.2744	0.368133	0.1874	0	0	0.50995	0.38335	0.348675	0.202675	0
SP1712	0.45515	0.485563	0.49218	0.6179	0.588425	0.45018	0.5601	0.48609	0.47123	0.4643
SP116610	0.41088	0.518105	0.395418	0.5348	0.37415	0.357793	0.663145	0.401287	0.488735	0.875067
SP5820	0.4714	0.29465	0.37995	0	0.2561	0.4714	0.1562	0.4286	0.25285	0.3922
SP111035	0.408475	0.414667	0.426483	0.431667	0.3842	0.377125	0.42035	0.404075	0.422433	0.4458
SP77930	0.1366	0.137325	0.151033	0.151033	0.1177	0.1267	0.239375	0.1627	0.1672	0.1744
SP49334	0.219775	0.2391	0.2229	0.1731	0.2161	0.2161	0.2507	0.26155	0.2367	0
SP107141	0.321	0.31815	0.52835	0.4915	0.4545	0.4545	0.3811	0.36448	0.461125	0
SP110860	0.261575	0.20349	0.4022	0.3102	0.287971	0.287186	0.323367	0.2564	0.237517	0.6364
SP105673	0.1068	0.136025	0.139317	0.1068	0.156433	0.1768	0.1427	0.150791	0.140792	0.0893
SP98953	0.443683	0.429356	0.5158	0.452367	0.46254	0.372917	0.4538	0.43074	0.429909	0.6
SP110851	0.203875	0.204414	0.237833	0.237833	0.2714	0.19644	0.210733	0.167309	0.17646	0.271
SP57933	0.255136	0.234348	0.255224	0.243325	0.254411	0.230243	0.246644	0.231446	0.240961	0.2319
SP103128	0.2917	0.31275	0.34375	0.327533	0	0.2267	0.31275	0.2756	0.2918	0
SP98851	0.4659	0.3282	0.3282	0.4659	0	0	0.48295	0.369825	0.3282	0.4659
SP112261	0	0.67205	0.534867	0.9545	0.3774	0.45535	0	0.64186	0.58974	0.4
SP98883	0.3611	0.19075	0.3351	0.3611	0.4359	0.4259	0	0.3611	0.2796	0.254067
SP1114	0.514475	0.56835	0.620167	0.8036	0	0	0.585	0.519691	0.4849	0.5467
SP82836	0.71905	0.553444	0.545083	0.50858	0.583171	0.55125	0.556844	0.537976	0.486145	0.69195
SP111011	0.27464	0.241791	0.1845	0.29125	0.2414	0.36315	0.2658	0.273756	0.252075	0.204233
SP105018	0.08393	0.103169	0.131179	0.121675	0.1022	0.100612	0.1048	0.107202	0.111426	0.120637
SP2793	0.34602	0.3964	0.4149	0.360933	0.46746	0.2656	0.483867	0.28205	0.4192	0.871
SP112817	0	0.123467	0.11185	0.1456	0	0	0	0.1363	0.1169	0.0865
SP135451	0	0.0876	0	0	0	0.0877	0.0615	0.0969	0.1061	0
SP105159	0.0757667	0.104471	0.09426	0.0964429	0.104143	0.12739	0.08564	0.109943	0.0983786	0.09785
SP125741	0.53125	0.3595	0.486233	0.3839	0.28195	0.288633	0.298157	0.364543	0.3303	0.6667
SP3631	0.229389	0.181107	0.194214	0.2044	0.200817	0.20076	0.2071	0.206418	0.1936	0.29485
SP109301	0.315275	0.329114	0.292775	0.3623	0.281125	0.31465	0.25438	0.285008	0.301985	0.30285
SP116586	0.1613	0.2099	0	0.1111	0.0926	0	0	0.203033	0.177275	0
SP107552	0	0.5926	0.5926	0.5926	0	0	0	0.5926	0.5926	0
SP105253	0.41285	0.36	0.445	0.54	0	0.4918	0.342825	0.42598	0.310543	0.34145
SP98861	0.3868	0.325657	0.3473	0.3823	0.26956	0.292167	0.303286	0.332663	0.3761	0.2479
SP124305	0.398275	0.3265	0.375767	0.27882	0.316014	0.298778	0.31641	0.32952	0.352032	0
SP107037	0	0.584775	0.348633	0.5111	0.5625	0.4	0	0.419	0.424917	0
SP19215	0.294462	0.271702	0.292422	0.295917	0.28109	0.284193	0.269126	0.275254	0.279719	0.289033
SP116612	0.23935	0.28285	0.320455	0.348433	0.2174	0.33405	0.3248	0.351411	0.332638	0.297775
SP94236	0.397183	0.287212	0.355664	0.426157	0.253333	0.2153	0.3079	0.2984	0.303	0.388333
SP116659	0.571208	0.562214	0.6139	0.70836	0.5155	0.576175	0.624467	0.577142	0.5118	0.7304
SP107091	0.5222	0.59615	0.716225	0.3	0.57515	0.48855	0.4048	0.606107	0.569071	0
SP107121	0.2316	0.2664	0.2	0.15	0.2	0.23335	0.13945	0.217933	0.225817	0.324975
SP101558	0.38935	0.3732	0.361433	0.5	0	0.4412	0.38935	0.406633	0.381375	0.5
SP110863	0.1551	0.153583	0.2323	0.1897	0.2414	0.19605	0.139633	0.166443	0.188612	0.1578
SP117309	0.489425	0.450125	0.623475	0.623475	0.484233	0.5334	0.65795	0.63496	0.55284	0
SP112170	0.4633	0.37253	0.28825	0.3422	0.3772	0.319083	0.26965	0.320645	0.337718	0.523367
SP1305	0.369469	0.370703	0.351488	0.374883	0.280221	0.373172	0.339223	0.33349	0.359683	0.5449
SP96882	0	0.46905	0	0	0.551	0	0	0.3871	0.3871	0.0882
SP54745	0.229814	0.279629	0.39215	0.3318	0.264446	0.226375	0.315129	0.268624	0.288235	0.4024
SP116715	0.428556	0.374039	0.310868	0.40222	0.467967	0.418062	0.379991	0.398932	0.298965	0.399467
SP135405	0.423275	0.28158	0.3871	0.505033	0.37452	0.350767	0	0.3811	0.34985	0
SP53548	0.246667	0.2617	0.25715	0.3864	0.233675	0.320625	0.1857	0.31235	0.25996	0.32695
SP101732	0.234	0.231992	0.234733	0.4516	0.1277	0.242133	0.2482	0.1792	0.184883	0.4516
SP107603	0	0.212633	0.3522	0	0.2382	0.09375	0.431933	0.152	0.292333	0
SP81494	0.24105	0.22862	0.236	0.279367	0.199783	0.207171	0.225671	0.226535	0.222876	0.25
SP99081	0.48015	0.38476	0.3734	0.6229	0.5714	0.5714	0.37035	0.4528	0.4528	0
SP111024	0.6271	0.273273	0.339225	0.4091	0.53485	0.359933	0.453625	0.310527	0.3242	0.34385
SP116657	0.4224	0.4581	0.41556	0.4839	0.58638	0.561529	0.50685	0.472345	0.400727	0
SP4265	0.2308	0.262833	0.26925	0.26925	0.3101	0.2582	0.26925	0.260517	0.23722	0.2308
SP12856	0.327258	0.312185	0.317017	0.337367	0.31544	0.325828	0.285844	0.342528	0.336436	0.23265
SP99133	0.3529	0.205167	0.2726	0.18705	0.1818	0.1818	0.29545	0.265075	0.265075	0.4091
SP50125	0.2288	0.181914	0.145667	0.0667	0.284833	0.284833	0.0667	0.2792	0.2044	0.2727
SP99173	0.2963	0.1745	0.251567	0.2944	0.289025	0.236929	0.1716	0.234171	0.245514	0.2368
SP103679	0	0.197867	0.1585	0	0.32365	0	0.2381	0.2083	0	0
SP54363	0.582375	0.395544	0.460483	0.509167	0.419286	0.3571	0.465143	0.500975	0.455394	0.393
SP98885	0.50735	0.494144	0.509933	0.56415	0.4874	0.518	0.27505	0.445245	0.428423	0.275
SP111047	0.221017	0.193753	0.21295	0.22118	0.143117	0.128825	0.236	0.162319	0.183595	0.2035
SP111119	0.39144	0.262579	0.410167	0.340225	0.272967	0.274536	0.27946	0.273894	0.252675	0.24935
SP116379	0.26755	0.22325	0.25385	0.25385	0	0.0893	0.26665	0.2152	0.210118	0.3415
SP50317	0.5533	0.364492	0.370167	0.411433	0.3	0.327375	0.520725	0.333973	0.352731	0.43505
SP78804	0	0	0.19485	0	0	0	0	0.1897	0.187033	0
SP57818	0.318727	0.282367	0.296971	0.289575	0.2841	0.308914	0.3372	0.272325	0.272313	0
SP103706	0.2614	0.2519	0.269	0	0	0.38525	0	0.30144	0.240317	0.2097
SP963	0.37991	0.383043	0.382164	0.357567	0.3667	0.3779	0.51795	0.344256	0.336971	0.42204
SP59245	0.661675	0.521192	0.57062	0.5794	0.450989	0.510925	0.493691	0.527674	0.505453	0.673733
SP122489	0.7407	0.537667	0.646967	0.7413	0	0.5625	0.7407	0.6817	0.52676	0.7407
SP124346	0.54185	0.391709	0.426156	0.43942	0.396725	0.400533	0.420733	0.423075	0.444417	0.31665
SP99007	0.2963	0.2019	0.2199	0.2008	0	0	0.2008	0.2499	0.29205	0.2963
SP116286	0	0	0	0	0.1667	0	0	0	0	0
SP81840	0.4722	0.601633	0.506556	0.549933	0.445017	0.51496	0.5685	0.484047	0.458908	0.8333
SP111043	0.2504	0.1725	0.27738	0.21288	0.13832	0.1693	0.21226	0.191207	0.186847	0.215133
SP30143	0	0.36865	0.7442	0	0	0.5128	0.2566	0.310733	0.6285	0
SP30071	0.1611	0.169386	0.14125	0.14125	0.155725	0.162657	0.182825	0.159475	0.148829	0.10175
SP99121	0.455717	0.39956	0.597433	0.433333	0.6346	0.48865	0	0.460073	0.477655	0
SP102045	0.689425	0.527122	0.60605	0.84855	0.59676	0.629875	0.661667	0.56074	0.461717	0.68925
SP1377	0.389067	0.522637	0.369325	0.39445	0.3393	0.422567	0.58335	0.448564	0.466227	0.3243
SP99181	0.2355	0.23995	0.1786	0	0.33045	0.26125	0.22185	0.191025	0.18855	0
SP50153	0.3681	0.425086	0.321475	0	0.32806	0.325771	0.519367	0.39545	0.378775	0.2563
SP4472	0.508243	0.5133	0.486371	0.467775	0.528333	0.59845	0.41514	0.476714	0.517611	0.4688
SP107047	0.375825	0.342443	0.42805	0.5484	0.392017	0.39235	0.33064	0.384167	0.37381	0.5833
SP111006	0.2903	0.31214	0.365588	0.391567	0.260367	0.3063	0.358927	0.331594	0.332093	0.29565
SP116668	0.377975	0.34173	0.313807	0.350758	0.303792	0.301513	0.344729	0.335334	0.347239	0.45065
SP84491	0.35165	0.337638	0.324025	0.300071	0.196933	0.24228	0.397825	0.314864	0.303928	0.7609
SP68659	0.8824	0.596967	0.69815	0.625667	0.44445	0.3404	0.8817	0.62186	0.643	0.8824
SP102652	0	0.3175	0	0	0.3175	0.18815	0.4167	0.1797	0	0
SP103507	0.248	0.257263	0.22575	0.3077	0.18695	0.21252	0.3077	0.251755	0.256509	0.2561
SP107080	0.340722	0.313138	0.4698	0.495767	0.250829	0.25854	0.493083	0.361209	0.325493	1
SP13036	0.8993	0.382478	0.419657	0.54185	0.3146	0.332925	0.4967	0.329836	0.354258	0.9302
SP59950	0.360575	0.38375	0.509475	0.438967	0.1824	0.230867	0.4326	0.307013	0.297758	0.57585
SP98902	0.4375	0.354712	0.365837	0.3854	0.377525	0.377525	0.3431	0.361764	0.385325	0.34265
SP111066	0.173725	0.311638	0.323478	0.260033	0.270486	0.267056	0.262657	0.2859	0.272406	0.2041
SP59280	0.40845	0.41635	0.40125	0.423743	0.3705	0.3705	0.41495	0.413255	0.4201	0.5161
SP98913	0.3182	0.5276	0.3909	0.4091	0.4091	0.4091	0.5	0.469975	0.486486	0.6
SP98915	0.3077	0.243867	0.21195	0	0	0.2381	0.31035	0.220667	0.2423	0.3636
SP111019	0.0977875	0.0984273	0.12695	0.106167	0.1007	0.1007	0.0986333	0.0970455	0.108121	0.2549
SP41453	0.4576	0.43305	0.4576	0	0	0.4085	0.4142	0.43305	0.37344	0
SP19983	0.389175	0.409911	0.484783	0.530625	0.45252	0.4607	0.4165	0.446942	0.400842	0
SP107640	0.185133	0.184475	0.17274	0.168367	0.195925	0.204167	0.180783	0.160554	0.209844	0
SP112180	0.416483	0.371333	0.4345	0.474067	0.44775	0.5262	0.298925	0.383291	0.373937	0.4444
SP31030	0.313725	0.351528	0.326817	0.358333	0.33467	0.38768	0.2966	0.366954	0.387956	0.283
SP124406	0.474555	0.4651	0.46478	0.491171	0.52396	0.558129	0.471336	0.470012	0.482836	0.35095
SP24815	0.6023	0.5867	0.669875	0.75	0.667625	0.600517	0.571425	0.6477	0.6435	1
SP116645	0.43975	0.392158	0.391429	0.33884	0.450567	0.502367	0.424933	0.422745	0.395091	0.5652
SP112248	0.55265	0.5589	0.495375	0.506817	0.278933	0.3592	0.532633	0.436	0.397783	0.5426
SP117001	0.735233	0.735233	0.615067	0.722033	0.7605	0.4237	0.752333	0.66205	0.697517	0.8333
SP124460	0.412754	0.397366	0.43791	0.391825	0.377246	0.371044	0.372748	0.366892	0.378776	0.37582
SP99029	0	0.1333	0.1833	0	0.1667	0.2188	0	0.1862	0.19975	0
SP99345	0	0	0.0597	0.0597	0	0	0.1091	0.1088	0.1088	0
SP23502	0.238125	0.1922	0.193783	0.26475	0.180636	0.17032	0.243167	0.192927	0.217075	0.212667
SP26499	0.3973	0.303967	0.330133	0.3973	0.3415	0.3282	0.3016	0.30415	0.307725	0
SP125733	0.560725	0.5255	0.5792	0.594375	0.398925	0.398925	0.5521	0.518867	0.54028	0.6531
SP101592	0.39835	0.2658	0.236275	0.2658	0.3113	0.4559	0.25875	0.29	0.307757	0.4634
SP50113	0	0.441325	0.333433	0	0	0.17285	0.40675	0.369757	0.33205	0
SP58668	0.298914	0.322168	0.232723	0.304175	0.27449	0.289433	0.32725	0.267164	0.27215	0.275633
SP124969	0.37994	0.309569	0.356555	0.3324	0.4224	0.381992	0.329411	0.391167	0.333971	0.3793
SP94917	0.295278	0.358684	0.293145	0.342933	0.444617	0.341356	0.31799	0.367067	0.335423	0.28715
SP92659	0.400762	0.400844	0.39792	0.41004	0.39065	0.372321	0.401509	0.39353	0.392312	0.401493
SP17016	0.36276	0.362286	0.30395	0.415467	0.382767	0.3741	0.39526	0.368414	0.349167	0.3333
SP117040	0.28305	0.353275	0.344325	0.2656	0.412333	0.603567	0.30238	0.427067	0.289343	0.3906
SP17329	0.6275	0.6275	0.4247	0.4247	0.6275	0.6275	0.6275	0.417475	0.4247	0
SP111175	0.201833	0.19305	0.183458	0.204611	0.185411	0.182387	0.200071	0.196035	0.198197	0.24364
SP30675	0.45343	0.471123	0.409592	0.394191	0.52033	0.495513	0.43734	0.448592	0.452743	0.45334
SP111002	0.183733	0.190175	0.184925	0.1768	0.19985	0.1821	0.2169	0.2042	0.16595	0.2439
SP82433	0.521407	0.581975	0.35012	0.508	0.52441	0.517258	0.615487	0.507698	0.541247	0.587333
SP96116	0.434725	0.418463	0.573975	0.573975	0.3492	0.345157	0.47156	0.507045	0.526333	0.8462
SP112969	0.21915	0.16195	0.2609	0	0.2609	0.1689	0	0.21915	0.1966	0.1585
SP117908	0.4607	0.422414	0.5094	0.597525	0.8519	0.8519	0.527375	0.422414	0.422038	0.4688
SP71576	0.30475	0.30475	0.30475	0.2514	0.1651	0.1651	0.30475	0.30475	0.30475	0.4444
SP112799	0.16645	0.16645	0	0.1279	0.1944	0	0	0.1944	0.1944	0
SP36498	0.2553	0.235375	0.20225	0	0	0	0	0.232883	0.22217	0.2222
SP83242	0.441833	0.39412	0.491938	0.43254	0.375973	0.35053	0.3898	0.395725	0.428193	0.7792
SP102827	0.346367	0.333475	0.39895	0.3962	0.3864	0.303333	0.31715	0.36395	0.452567	0
SP114987	0.449267	0.42216	0.453333	0.3688	0.3614	0.4079	0.4583	0.45237	0.425208	0.1709
SP83382	0.41515	0.481791	0.451305	0.363856	0.506344	0.383292	0.4333	0.495358	0.467766	0.529288
SP107076	0.43269	0.388664	0.43658	0.40305	0.387764	0.439292	0.377681	0.443283	0.416923	0.349486
SP122476	0.5213	0.4807	0.48055	0.475433	0.451167	0.26425	0.9574	0.345683	0.345683	0.9574
SP124311	0.490912	0.440193	0.378935	0.41434	0.411253	0.404077	0.41138	0.422355	0.437828	0.441167
SP7421	0.33335	0.279458	0.378586	0.33335	0.1154	0.1154	0.342237	0.314822	0.307142	0.7037
SP111098	0.263733	0.2114	0.29518	0.269867	0.1546	0.1556	0.261433	0.240262	0.217022	0.3043
SP107111	0.52125	0.3379	0.7778	0.7778	0.52125	0.5812	0.0566	0.35936	0.42776	0
SP111166	0.369767	0.337564	0.3716	0.3576	0.343033	0.368225	0.402175	0.352161	0.328128	0.433333
SP50611	0.280147	0.280033	0.321054	0.354733	0.32755	0.394105	0.321425	0.29931	0.270779	0.357967
SP111015	0.1876	0.161544	0.19196	0.198233	0.123833	0.1179	0.227533	0.156009	0.157773	0.2413
SP112125	0	0.25	0.15895	0.1875	0.269233	0.236025	0.2647	0.265067	0.201433	0.2449
SP56460	0.3786	0.266283	0.268267	0.3124	0	0.246333	0.30834	0.2559	0.238278	0.5072
SP10084	0.4285	0.35172	0.7647	0.6038	0.17115	0.1395	0.7647	0.460025	0.494925	0.7647
SP110855	0.3289	0.307588	0.25506	0.245183	0.291317	0.286714	0.33276	0.287081	0.2995	0.4667
SP125766	0.13218	0.1493	0.144225	0.14968	0.14375	0.162175	0.1551	0.139408	0.143736	0
SP9251	0.210533	0.20696	0.2118	0.16995	0.2083	0.2083	0.220133	0.185775	0.21135	0.21355
SP56704	0.280236	0.219859	0.24508	0.197313	0.223642	0.213475	0.179925	0.230464	0.230281	0.237
SP124376	0.400236	0.401438	0.43938	0.404375	0.42925	0.38344	0.4782	0.414624	0.419008	0.4163
SP122372	0.4878	0.4878	0	0	0	0	0	0.0811	0	0
SP95126	0.25665	0.20888	0.214508	0.238857	0.183958	0.15759	0.206033	0.197747	0.197788	0.328767
SP53387	0.3934	0.323204	0.26385	0.38	0.264618	0.303417	0.315163	0.307912	0.359168	0.0656
SP125717	0.50875	0.33804	0.3581	0.50875	0.4443	0.3968	0.6321	0.35785	0.35785	0.74975
SP112899	0.2518	0	0	0	0	0	0.3125	0.2518	0.2518	0
SP112192	0.2069	0.228633	0.24444	0.2069	0.2	0.2143	0.198625	0.286675	0.2672	0.36
SP119755	0.509217	0.355058	0.4053	0.453871	0.362657	0.437133	0.5051	0.390906	0.373869	0.4819
SP112201	0.16515	0.1972	0.188225	0.0694	0.124767	0.16	0.0694	0.200457	0.213486	0.15375
SP98889	0	0.3514	0.4915	0.1667	0	0.1667	0.29225	0.376433	0.384	0.3421
SP106677	0.259633	0.32255	0.394275	0.3416	0.2571	0.273	0.3071	0.332686	0.3	0.5185
SP88050	0.5	0.5	0	0	0.5	0.5	0.5	0.5	0.5	0
SP30907	0.395875	0.37384	0.4304	0.54825	0.4021	0.310533	0.421767	0.378771	0.34164	0.551
SP111054	0.213633	0.164608	0.162357	0.20275	0.127983	0.13154	0.170225	0.152539	0.150285	0.213533
SP112779	0.1034	0.141867	0.1034	0.1034	0	0	0.1034	0.10625	0.10625	0.19455
SP112241	0.2333	0.2357	0.2333	0.2333	0.22334	0.1807	0.204833	0.228675	0.224433	0.1936
SP19606	0.4455	0.395521	0.408971	0.378591	0.308538	0.386614	0.494386	0.428096	0.37682	0.7241
SP84056	0.6159	0.4683	0.825	0.2903	0.3962	0.549	0.550067	0.4621	0.49285	0.3333
SP70465	0	0.3865	0.42005	0.6444	0.2424	0.2424	0.6444	0.338467	0.3415	0
SP135411	0.2011	0.172717	0.129717	0.140933	0.1345	0.119067	0.1504	0.1441	0.14607	0
SP57538	0.33996	0.236492	0.288257	0.23365	0.214475	0.168471	0.23365	0.252861	0.266944	0.21705
SP111101	0.39605	0.344011	0.37955	0.381833	0.29924	0.30116	0.4184	0.339529	0.36158	0.5
SP99013	0.587875	0.55178	0.507257	0.441967	0.55515	0.55515	0.6337	0.479475	0.505389	0
SP8891	0.354275	0.31028	0.374767	0.45215	0.2518	0.2518	0.419067	0.308657	0.308657	0.3391
SP5808	0.15255	0.2877	0.37158	0.1589	0	0.1162	0.272325	0.233843	0.2705	0.3556
SP99033	0.2611	0.292243	0.3816	0.2258	0.1625	0.1625	0.345825	0.397333	0.298957	0.4
SP58349	0.476991	0.42229	0.512338	0.466245	0.354329	0.386008	0.502282	0.47435	0.502775	0.5468
SP112310	0.572067	0.50575	0.527633	0.5102	0.557875	0.58144	0.34232	0.548	0.503743	0.5625
SP56644	0.463633	0.447206	0.470789	0.512567	0.556233	0.479517	0.3826	0.43814	0.463152	0.3542
SP101576	0.30455	0.26016	0.2474	0.481433	0.1343	0.16175	0.394467	0.307787	0.297138	0.8
SP81711	0.457325	0.363236	0.452167	0.52555	0.3811	0.304575	0.473167	0.389225	0.415018	0.4588
SP111074	0.28982	0.2761	0.257567	0.190933	0.161333	0.5	0.2232	0.295356	0.270845	0.3568
SP99101	0.6366	0.4667	0	0	0.511333	0	0.7692	0.654933	0.5835	0
SP106998	0.4107	0.41928	0.5	0.5	0.3529	0.274333	0.50925	0.354343	0.39784	0.4643
SP49469	0.5288	0.2835	0.31294	0.5288	0.5066	0.311075	0.1515	0.3125	0.407745	0
SP56079	0.390386	0.305378	0.2886	0.34445	0.232364	0.289271	0.303943	0.304039	0.312317	0.305067
SP37432	0.2	0.2111	0.251833	0	0	0	0.2222	0.2477	0.251833	0.2222
SP99157	0.2569	0.24486	0.2445	0.1971	0.2427	0.190633	0.1333	0.323567	0.247533	0
SP29559	0.504033	0.4503	0.6393	0.5755	0.3643	0	0.544533	0.504033	0.4482	0.8732
SP117085	0.3889	0.3889	0	0	0.3889	0.3889	0	0	0	0
SP103221	0.42195	0.5195	0	0.4286	0	0.4324	0	0.37168	0.38395	0
SP101881	0.3943	0.339183	0.347967	0.48405	0.2982	0.335825	0.7647	0.299942	0.350543	0.51985
SP50139	0.1818	0	0.1818	0.1818	0.1818	0.1818	0	0.19345	0.174933	0
SP125758	0.6042	0.490725	0.6042	0.6042	0.5402	0.4902	0.6042	0.441517	0.6042	0.6857
SP102035	0.3898	0.36675	0.37582	0.4427	0.3654	0.3654	0.45035	0.436829	0.364762	0.41875
SP50165	0.47325	0.3132	0.4408	0.5788	0.417325	0.471625	0.32	0.460017	0.411114	0.25
SP103535	0.2248	0.2848	0.2353	0.1966	0.240125	0.293513	0.318333	0.325109	0.323571	0.4242
SP69898	0.400525	0.363712	0.43715	0.447067	0.234517	0.26802	0.47875	0.294308	0.417522	0.45715
SP121816	0.3492	0.3492	0	0	0.5	0.5	0.7059	0	0.52755	0
SP50151	0.52115	0.433513	0.6875	0.4708	0.3438	0.5198	0.5224	0.42536	0.409514	0.6875
SP99197	0.262433	0.418714	0.448229	0.339467	0.391189	0.55424	0.428	0.454891	0.430232	0.308967
SP59452	0.298075	0.3294	0.303625	0.3288	0.358337	0.301358	0.329586	0.301685	0.314758	0
SP96511	0.274725	0.269225	0.3413	0.450467	0.37876	0.30434	0.21375	0.294762	0.2833	0.29805
SP84922	0.36268	0.267708	0.34256	0.338325	0.184356	0.2366	0.28536	0.283171	0.2995	0.4589
SP30093	0.27175	0.294725	0.2916	0.27175	0.2561	0.2561	0.3218	0.36	0.33672	0.266533
SP31854	0.286483	0.277853	0.265525	0.2837	0.214973	0.209455	0.236144	0.279569	0.296785	0.359667
SP104984	0.33145	0.223575	0.257267	0.2254	0.19872	0.24145	0.17344	0.250286	0.250625	0.2453
SP56821	0.3821	0.360692	0.3873	0.449625	0.276167	0.33908	0.3335	0.336577	0.388218	0.5366
SP59308	0	0.6406	0.6406	0.7812	0	0.41215	0.7812	0.4847	0.535167	0
SP124420	0.452322	0.517563	0.427533	0.523757	0.507169	0.513014	0.474838	0.51011	0.514539	0.4833
SP97681	0.318767	0.320983	0.3281	0.3513	0.31765	0.276725	0.3805	0.275617	0.29006	0.38325
SP125714	0.1142	0.1641	0.143	0.143	0.12705	0.182475	0.18465	0.178437	0.15444	0.1818
SP117113	0.39025	0.388367	0.39025	0.4286	0.4286	0.4286	0.39025	0.402375	0.403775	0
SP49229	0.5104	0.5104	0.5104	0.312	0.5104	0.5104	0.5243	0.257833	0.312	0
SP116469	0.7692	0.60875	0.7692	0	0	0	0	0.7692	0.7692	0
SP116518	0.2143	0.277242	0.2667	0.22	0.2045	0.4745	0.34705	0.379725	0.377658	0.325525
SP116582	0.4559	0.6406	0.4559	0.4559	0.456933	0.509375	0.6765	0.4898	0.42158	0.6765
SP111123	0	0.1675	0.1675	0.2683	0.1495	0.1404	0	0.166525	0.1675	0
SP127632	0.37734	0.387331	0.375945	0.345483	0.38028	0.384257	0.398033	0.383029	0.389955	0.2639
SP50183	0.20136	0.20808	0.26665	0.3333	0.2	0.24345	0.2364	0.2566	0.211986	0.3333
SP117003	0.162525	0.176517	0.178333	0.175467	0.1713	0.19484	0.18615	0.193275	0.178933	0.2002
SP116726	0.26115	0.240286	0.317512	0.255325	0.1788	0.177325	0.29165	0.282992	0.3182	0.375
SP80367	0.5663	0.45562	0.5914	0.607967	0	0.1408	0.37488	0.39225	0.4913	0.7361
SP112228	0.2622	0.2432	0.323367	0.2812	0.3156	0.29865	0.3679	0.313917	0.29394	0.3889
SP112785	0	0.2253	0	0	0	0.087	0	0.087	0	0
SP61343	0.6766	0.449067	0.6766	0.5448	0.45	0.38455	0.9032	0.50235	0.48695	0.9032
SP112935	0	0.21545	0.3333	0	0	0	0.3333	0.3333	0.3333	0
SP101628	0.3353	0.3229	0.274183	0.395467	0.27664	0.2502	0.310967	0.290117	0.264	0.5075
SP82451	0.2544	0.288265	0.281844	0.213414	0.330962	0.326756	0.37363	0.321359	0.314737	0.4706
SP125785	0.54955	0.5463	0.576633	0.54955	0.5464	0.5464	0.576633	0.576633	0.498525	0.617
SP103408	0.1906	0.163486	0.173033	0.2105	0	0.082	0.14015	0.150275	0.1837	0
SP76515	0.336175	0.230244	0.349325	0.332025	0.282	0.223567	0.31084	0.246244	0.280375	0.5
SP116663	0.53215	0.441163	0.4052	0	0.446367	0.275	0.375	0.3334	0.37964	0.3255
SP107406	0.6762	0.41375	0.4574	0.605167	0.4	0.4571	0	0.6456	0.5735	0
SP78851	0.2517	0.20516	0	0	0.3832	0.288625	0	0.238233	0.2201	0
SP89389	0.43255	0.452	0.60025	0.4224	0	0.619	0.60025	0.468667	0.44636	0.7222
SP117376	0.307525	0.29936	0.3134	0.4514	0.30382	0.30552	0.511733	0.266012	0.303211	0.3247
SP116534	0.37525	0.37525	0.42095	0.4848	0	0	0	0.42095	0.42095	0
SP117621	0.4032	0.34295	0.3986	0.2388	0.37495	0.2344	0.1562	0.323178	0.302333	0
SP107556	0.4074	0.5029	0.4681	0	0.46845	0.46845	0.1515	0.4481	0.43775	0
SP101532	0.424033	0.456914	0.362275	0.475	0.383567	0.4534	0.5889	0.36368	0.350818	0.7
SP107786	0.2733	0.197625	0.2262	0.2554	0.135325	0.168333	0.27865	0.199655	0.201333	0.1827
SP102161	0.44085	0.408767	0.6522	0.44085	0.223267	0.2013	0.6522	0.29455	0.373267	0.47725
SP34493	0.2564	0.31	0.2564	0	0.2564	0.3142	0.28825	0.24955	0.2564	0
SP57251	0.671925	0.613397	0.389275	0.431733	0.395567	0.575244	0.540767	0.560183	0.568898	0.583237
SP116256	0	0.20835	0.2821	0	0	0	0.1667	0.26605	0.2744	0
SP54113	0.427205	0.425643	0.469246	0.469427	0.42381	0.453184	0.445508	0.447548	0.460051	0.61134
SP62616	0.58535	0.634567	0.58535	0.592	0.34535	0.270533	0.9688	0.43637	0.397814	0.535433
SP124273	0.224267	0.39804	0.377067	0.1529	0.29865	0.277	0.9286	0.366125	0.365829	0.9841
SP127630	0.484133	0.472214	0.0877	0	0.2814	0.25735	0.5	0.349125	0.368717	0
SP116734	0.464633	0.381075	0	0	0.3333	0.464633	0.5227	0.23185	0.1304	0
SP49541	0.317375	0.305475	0.37295	0.3537	0.333067	0.360175	0.3149	0.31755	0.2973	0
SP98192	0	0.374133	0.72	0	0.24515	0.31355	0.38515	0.38174	0.4606	0
SP6429	0.387267	0.469025	0.483125	0.572733	0.5	0.671433	0.421233	0.513325	0.389171	0.8095
SP98849	0	0.381	0	0	0.3038	0.381	0.23025	0	0	0
SP101716	0.382175	0.300433	0.41539	0.515217	0.2609	0.263675	0.4442	0.317107	0.40415	0.9296
SP78716	1	1	1	1	0.2545	0.1667	1	0.58335	1	1
SP112797	0	0.254833	0.3333	0	0	0.3125	0.2917	0.2733	0.3125	0
SP8831	0.507225	0.502546	0.437786	0.382667	0.34575	0.319767	0.456556	0.44954	0.45795	0.70305
SP116365	0.3317	0.374767	0.3168	0.287283	0.381733	0.287133	0.3593	0.287233	0.334738	0.2895
SP124365	0.496659	0.458013	0.479235	0.426262	0.420331	0.495193	0.5304	0.46974	0.448277	0.577633
SP116361	0.260025	0.234933	0.203925	0.1778	0.24488	0.181133	0.19675	0.209983	0.2217	0.19035
SP116371	0.339867	0.3861	0.31468	0.41795	0.2692	0.2692	0.407667	0.31468	0.31468	0.492533
SP117363	0	0.44275	0	0	0	0.4355	0.4355	0.358	0.383833	0.5625
SP98896	0.5225	0.47345	0.4251	0.437933	0.3234	0.398167	0.4007	0.4368	0.389525	0.6842
SP32958	0.26695	0.257686	0.245233	0.2346	0.23026	0.24615	0.28448	0.234737	0.222244	0.16325
SP90269	0.625	0.579575	0.625	0.625	0.548967	0.66555	0.579575	0.425967	0.425967	0.5439
SP55142	0.300688	0.272763	0.277742	0.2772	0.303597	0.291644	0.245363	0.271921	0.26258	0.352833
SP112205	0.426683	0.478538	0.4946	0.49185	0.418683	0.452225	0.448133	0.452192	0.464533	0
SP103619	0.049	0	0	0	0.1481	0.1481	0	0.049	0.1091	0
SP104530	0.482967	0.505012	0.431014	0.537375	0.402929	0.411372	0.527921	0.482768	0.496167	0.5315
SP110859	0.296725	0.268	0.23165	0.267233	0.265633	0.25895	0.271225	0.250495	0.253985	0.288267
SP135188	0.25	0.15466	0.165167	0.3333	0.1544	0.1667	0.208333	0.15332	0.164586	0.2647
SP106993	0.52725	0.3939	0.45215	0.45215	0.52725	0.4905	0.2609	0.42176	0.404233	0.4022
SP35849	0	0.25	0.71705	0.7674	0	0.4333	0.3684	0.629533	0.629533	0.3611
SP99085	0.405967	0.36128	0.2656	0.32495	0.3258	0.32588	0.339967	0.379557	0.402175	0.4865
SP29940	0.646	0.221087	0.26125	0.2939	0.380667	0.380667	0.3006	0.160255	0.174833	0.3889
SP117165	0.4989	0.34262	0.34882	0.4005	0.3436	0.4289	0.37935	0.399533	0.4005	0.8095
SP118015	0.346625	0.309411	0.411433	0.411433	0.3041	0.3724	0.39785	0.34176	0.316871	0.338267
SP97771	0.39405	0.40096	0.43075	0.3917	0.42156	0.381986	0.4429	0.396889	0.369967	0.454933
SP5559	0.43596	0.291106	0.31315	0.357722	0.332475	0.332475	0.321533	0.321771	0.325871	0.4844
SP116679	0.375	0.33265	0.125	0	0	0	0	0.2903	0.24515	0
SP101604	0.337733	0.35235	0.303133	0.2566	0	0	0.25215	0.345125	0.35235	0.25
SP59288	0.23145	0.3399	0.2609	0	0.2479	0.1522	0.40265	0.22186	0.26515	0.2609
SP90629	0.170471	0.179975	0.184025	0.15998	0.14316	0.166278	0.165525	0.19345	0.193444	0.29385
SP124307	0.284675	0.310574	0.281167	0.2824	0.23865	0.24513	0.304531	0.296061	0.300347	0.308014
SP116353	0.628467	0.60815	0.44155	0.56645	0.58055	0.208675	0.4838	0.369078	0.38965	0.54035
SP117629	0.1612	0.31955	0.2326	0	0.2222	0	0.263625	0.1335	0.23836	0
SP1491	0.5326	0.534843	0.49496	0.4896	0.5473	0.6249	0.556133	0.447944	0.487233	0.5637
SP13072	0.1724	0.35285	0.31445	0	0.3864	0.4565	0.2	0.448633	0.448633	0
SP117878	0.56565	0.533967	0.533967	0.533967	0.4192	0.394867	0.4484	0.4472	0.533967	0.587
SP107384	0.601267	0.319767	0.3684	0	0.40105	0	0	0.602867	0.51626	0.4375
SP87903	0	0.10945	0.0807	0.08	0.1124	0	0.12	0.0715333	0.0715333	0.2396
SP98265	0.413825	0.450017	0.487325	0.4123	0.203625	0.21214	0.488025	0.398189	0.384122	0.519733
SP67609	0.63096	0.67182	0.5798	0.875	0.71944	0.504578	0.47166	0.519314	0.586125	0.919233
SP135194	0	0.0976	0.186	0.1143	0.1413	0.1413	0.2308	0.127333	0.108675	0
SP50109	0.295567	0.29155	0.28834	0.2443	0.38335	0.38335	0.3462	0.25465	0.24558	0.4286
SP50115	0	0	0.17405	0	0.18785	0.212633	0.2286	0.268675	0.256367	0.2381
SP116571	0	0.1739	0	0	0	0	0	0	0	0
SP123972	0.54	0.38245	0.430933	0.3312	0.409233	0.54	0.54	0.31765	0.3802	0.0804
SP124351	0.338125	0.32784	0.2611	0.1622	0.330833	0.3368	0.2537	0.328471	0.351137	0.225433
SP50097	0.411029	0.415858	0.40775	0.435767	0.36555	0.369681	0.6486	0.386742	0.403312	0.746275
SP110803	0.340167	0.340167	0.4348	0.3779	0.2647	0.2647	0.34975	0.30225	0.323675	0.4348
SP30332	0.32447	0.379975	0.402167	0.611375	0.286467	0.413255	0.356883	0.400528	0.416995	0.5729
SP50119	0.39445	0.412125	0.3748	0.0784	0.28486	0.26534	0.223417	0.234183	0.352325	0.3995
SP117425	0.3953	0.25645	0.25928	0.3953	0.2597	0.257275	0.3953	0.253617	0.25279	0.3953
SP117136	0.587	0.587	0.587	0.587	0.587	0.4753	0.587	0.4753	0.587	0.2727
SP99185	0.271167	0.260433	0.29605	0.2605	0.259633	0.22875	0.2432	0.2808	0.244375	0.2433
SP49391	0.3311	0.329575	0.4444	0.4444	0.338	0.1923	0.3847	0.27005	0.355	0.4444
SP55509	0.305294	0.300287	0.297023	0.364167	0.287269	0.290482	0.293867	0.268053	0.281712	0.292617
SP43792	0	0.42055	0.4239	0.26675	0.338533	0.29515	0.2703	0.35036	0.31305	0
SP103742	0.4868	0.362514	0.38985	0	0.3611	0	0.3578	0.333183	0.302886	0.3333
SP99241	0.469575	0.4078	0.3795	0.2075	0.572	0.5078	0.391167	0.458164	0.471622	0.4048
SP117011	0.137717	0.145376	0.158192	0.18074	0.1491	0.160583	0.1477	0.145762	0.136011	0.163111
SP117700	0	0.1277	0	0	0	0	0	0.1277	0.1277	0
SP98855	0	0.448525	0.4	0	0	0.2778	0.5	0.35125	0.4246	0.5
SP7785	0.3548	0.243043	0.2585	0.3833	0.2518	0.2683	0.2219	0.250656	0.27216	0.34405
SP71846	0.613867	0.482983	0.48688	0.71025	0.5524	0.5524	0.6309	0.448057	0.43113	0.7368
SP108017	0.1558	0.1558	0.1558	0.1558	0.1558	0.1558	0.19595	0.1593	0.1593	0
SP98078	0.3462	0.307	0.3209	0.3934	0.1034	0.2576	0.3653	0.320978	0.336744	0.2857
SP103844	0	0.24945	0.2308	0.21125	0.2703	0.2703	0.119	0.2308	0.260767	0.119
SP112795	0	0.256	0.11825	0.3922	0.0698	0.0698	0	0.181	0.226933	0
SP107952	0.2739	0.2213	0.2739	0.2739	0.309433	0.19305	0.2213	0.258675	0.258675	0.2778
SP59320	0.2308	0.2195	0.2547	0.26665	0.2308	0.25825	0.227075	0.22902	0.23744	0.125
SP135455	0.10966	0.136309	0.1622	0.0894	0.15386	0.15794	0.122486	0.137418	0.149952	0.1352
SP77956	0.15	0.183033	0.1604	0.1875	0.138625	0.196	0.157033	0.1822	0.19844	0.19245
SP110770	0.20695	0.203225	0.187775	0.192033	0.218333	0.218333	0.192033	0.187975	0.192033	0.1818
SP69812	0.20388	0.217867	0.20705	0.214967	0.19745	0.192733	0.228	0.219683	0.213975	0.25
SP95406	0.532433	0.5654	0.597767	0.581629	0.486625	0.486625	0.597767	0.597767	0.5654	0.8769
SP97194	0.37175	0.347814	0	0	0.4405	0.4666	0.421633	0.37426	0.38069	0.5593
SP112809	0.1282	0.14475	0.1613	0.1613	0.1928	0.1613	0	0.14475	0.146317	0.2917
SP35412	0.4474	0.2651	0.2104	0	0.33046	0.27324	0.2857	0.2753	0.238271	0.303
SP101515	0.182275	0.182275	0.2021	0.32335	0.122033	0.2083	0.3308	0.1787	0.1787	0.3448
SP111038	0.331717	0.327711	0.309513	0.286333	0.45305	0.4039	0.341667	0.274962	0.26628	0.619
SP117930	0.38855	0.279817	0.37915	0.37915	0	0	0.35435	0.289967	0.299611	0.45705
SP31046	0	0.2703	0.274433	0.2703	0.2432	0.26865	0.2703	0.21315	0.253133	0
SP28335	0.683567	0.5027	0.531	0.67755	0.075	0	0.2558	0.44965	0.59228	0.29425
SP111004	0.2274	0.2512	0.179	0.26825	0	0.15022	0.242975	0.216417	0.192944	0.2535
SP2714	0.423217	0.410467	0.561157	0.36625	0.3143	0.3143	0.304557	0.417381	0.363827	0.5119
SP2781	0.52345	0.52345	0.873	0.8636	0.8636	0.873	0.8636	0.873	0.6431	0
SP127628	0.2429	0.316282	0.3206	0.32035	0.1791	0.18985	0.317769	0.290769	0.341881	0.1083
SP102123	0.60095	0.42944	0.489933	0.60095	0.31635	0.31805	0.511733	0.42944	0.418467	0.875
SP122676	0.31686	0.35885	0.280525	0.3914	0.3158	0	0.285933	0.30344	0.316729	0.4687
SP23451	0.375	0.3038	0.3038	0.3038	0	0	0.32385	0.3038	0.3038	0.375
SP97243	0	0.19335	0.1392	0	0.1392	0.1392	0	0.193975	0.176	0.2647
SP99209	0.1389	0.3705	0.1389	0	0.3158	0.3158	0.28835	0.33564	0.3705	0.1778
SP69705	0.275575	0.286383	0.2395	0.387067	0.25265	0.3835	0.3141	0.32735	0.2733	0.325
SP2154	0.2616	0.404775	0.2611	0.3889	0.4667	0	0.5147	0.26964	0.285117	0
SP99253	0.475267	0.42975	0.326775	0.5353	0.2524	0.253483	0.47205	0.39488	0.398756	0.6316
SP6673	0.66115	0.443485	0.361875	0.6359	0.400744	0.487611	0.432111	0.419861	0.433255	0.434525
SP98853	0.3221	0.315817	0.355367	0.35932	0.2965	0.382975	0.296571	0.360173	0.335762	0
SP112807	0.2395	0.1795	0	0	0.2475	0.3051	0	0.1195	0.137633	0
SP125691	0.356125	0.3334	0.332933	0.32145	0.29165	0.263867	0.2862	0.328467	0.3426	0.3929
SP107119	0.2321	0.310286	0.251725	0.2866	0.225	0.248775	0.23775	0.30685	0.28951	0.2723
SP107136	0.50435	0.49772	0.503175	0.4667	0.37954	0.4885	0.5263	0.514686	0.481462	0.5517
SP112973	0	0.260725	0.230225	0	0	0	0	0.25355	0.25355	0.1094
SP8660	0.5073	0.562333	0.7281	0.7419	0.2162	0.386433	0.7419	0.4779	0.525975	0.7419
SP24135	0.43875	0.44624	0.511317	0.66665	0.4369	0.4432	0.5722	0.562189	0.573475	0.67855
SP50111	0	0.4167	0.3125	0	0.4167	0.357	0	0.284783	0.3125	0.2344
SP102647	0.1625	0.2596	0	0	0.1267	0.5254	0.25	0.298475	0.298475	0
SP85431	0	0	0	0	0.2239	0	0.1829	0.1867	0.14005	0.0769
SP103694	0.3421	0.24605	0	0	0.325	0.325	0.2708	0.217867	0.278433	0.17895
SP135323	0.4228	0.4938	0.4228	0.6667	0	0	0.4938	0.4228	0.4938	0.6667
SP2155	0.3333	0.34944	0.41075	0.3548	0.0682	0.1379	0.32955	0.455375	0.45002	0.3043
SP117800	0.17515	0.191467	0.2188	0.2188	0.1753	0.1753	0.223467	0.266567	0.2591	0
SP43651	0.1928	0.5106	0.5368	0.1212	0	0.9	0.292	0.3716	0.4255	0
SP77131	0.44315	0.378767	0.300525	0.378767	0.2124	0.2124	0.378767	0.300525	0.300525	0.5273
SP125764	0.33515	0.23878	0.30904	0.28025	0.21574	0.24885	0.4203	0.270714	0.216945	0.3065
SP116635	0.41132	0.373833	0.406686	0.357583	0	0.3	0.35935	0.350087	0.361115	0.2941
SP76136	0.643967	0.53115	0.414667	0.72035	0.40288	0.4139	0.673467	0.478557	0.4411	0.61615
SP111078	0.2727	0.143525	0.1281	0	0.19365	0.237233	0.13845	0.14585	0.130667	0
SP116947	0.186	0.19656	0.19085	0.186	0.159633	0.159633	0.1609	0.1791	0.2049	0
SP49551	0.1564	0.222557	0.204656	0.22505	0.1786	0.1495	0.2346	0.20312	0.207829	0.2
SP99137	0.477267	0.50828	0.50935	0.53735	0.458	0.5871	0.5299	0.495123	0.469822	0.40594
SP111017	0.50666	0.37615	0.34585	0.409667	0.415633	0.2462	0.428633	0.399242	0.379531	0.517333
SP124977	0	0.413425	0	0	0.402414	0.375725	0.417667	0.3912	0.387225	0
SP105086	0.223656	0.209965	0.219267	0.20971	0.20667	0.198208	0.2267	0.217472	0.231909	0.338
SP98881	0.347875	0.452925	0.415262	0.30355	0.464612	0.323333	0.4828	0.37543	0.41336	0
SP101584	0.74595	0.558875	0.4836	0.8919	0	0	0.6126	0.552867	0.51065	0.8919
SP76017	0.477833	0.477833	0.477833	0.477833	0.3372	0.4799	0.38615	0.4255	0.376225	0.6296
SP89443	0.7143	0.56925	0.4098	0.56925	0.5	0.3106	0.56925	0.36615	0.3606	0.7143
SP70178	0.431133	0.28248	0.4408	0.4408	0.332167	0.380967	0.4408	0.34075	0.33138	0.2857
SP107607	0.9211	0.4673	0.573325	0.6785	0	0	0.9355	0.534587	0.5462	0
SP98941	0.4222	0.42326	0.3495	0.3772	0.3333	0.38095	0.3333	0.409375	0.39416	0
SP5844	0.63845	0.63845	0.663733	0.663733	0.5227	0.5227	0.639933	0.5829	0.49012	0.7954
SP116752	0.256	0.218775	0.167067	0.2022	0.2947	0.162233	0.256	0.20578	0.256	0.16995
SP112933	0.1471	0.1262	0.1207	0.1391	0	0	0.106	0.1207	0.119425	0.1471
SP99037	0	0.2059	0	0	0	0	0	0.1186	0.1502	0.2059
SP99145	0	0.5152	0.41145	0	0.2902	0.4351	0.5152	0.41145	0.354767	0.5152
SP59360	0.3906	0.33768	0.3221	0.375	0.431233	0.42945	0.3663	0.426912	0.364083	0
SP117369	0.171508	0.15966	0.188467	0.167156	0.168631	0.16905	0.149767	0.155162	0.159116	0.1919
SP107088	0.3846	0.408925	0.3846	0.3846	0.378333	0.393667	0.3846	0.3401	0.365733	0.46155
SP98879	0.310875	0.2523	0.291325	0.269733	0.273383	0.254233	0.244	0.261823	0.283175	0.2735
SP4875	0.44395	0.478986	0.5524	0.5552	0.4302	0.44125	0.477967	0.415083	0.37025	0.74355
SP107123	0.875	0.56411	0.5688	0	0.412583	0.506729	0.64266	0.494867	0.678175	0.3684
SP47990	0.307167	0.2496	0.41175	0.41175	0.2308	0.098	0.337425	0.41175	0.41175	0.41175
SP117323	0.526525	0.46884	0.616567	0.59712	0.8042	0.8042	0.510967	0.501043	0.532767	0.641
SP117656	0.30276	0.2794	0.3301	0.370275	0.29805	0.28844	0.3813	0.277029	0.264094	0.3571
SP112188	0.1918	0.1883	0.0755	0	0.276033	0.196667	0.125	0.12435	0.13805	0
SP106631	0.155929	0.122525	0.143033	0	0.12875	0.134087	0.0919	0.1431	0.130775	0.2069
SP92947	0.6555	0.538567	0.564767	0.564767	0.495333	0.6555	0.6162	0.564767	0.564767	0
SP99165	0.380933	0.41075	0.424667	0.45845	0.2857	0.248433	0.6057	0.370167	0.3853	0.44195
SP121761	0.1915	0.1938	0.1915	0.1915	0.19905	0.198067	0	0.17884	0.1245	0
SP107019	0.4118	0.5423	0.446333	0.441867	0.4473	0.531533	0.525	0.4448	0.46084	0
SP57901	0.2368	0.205131	0.233478	0.198967	0.1849	0.2124	0.1809	0.18985	0.1934	0.217233
SP125722	0.1304	0.1304	0.1304	0.1304	0.1304	0.1304	0.1304	0.18785	0.18785	0
SP116620	0.51024	0.503233	0.46284	0.5129	0.5252	0.49575	0.635925	0.503216	0.466253	0.67236
SP28791	0.5853	0.508467	0.5853	0.540733	0.2	0.2	0.462225	0.540733	0.49425	0.72815
SP98871	0.454333	0.4326	0.495725	0.53865	0.53865	0.550467	0.43815	0.406537	0.426567	0.4746
SP84982	0.44325	0.364993	0.408835	0.45385	0.402938	0.392506	0.344458	0.38907	0.371857	0.3303
SP112178	0.4103	0.3498	0	0.375	0.50095	0.43538	0.329125	0.421186	0.432	0.4333
SP49157	0.423075	0.463789	0.4604	0.4866	0.4674	0.4346	0.50015	0.4239	0.447044	0.4766
SP110816	0.343067	0.38035	0.312767	0.38035	0.2689	0.296	0.38035	0.32966	0.3143	0.4918
SP58326	0.381263	0.400614	0.369591	0.293625	0.385012	0.375223	0.4445	0.347355	0.377275	0.32328
SP98893	0.377267	0.314267	0.5926	0.44445	0.213833	0.25145	0.49365	0.29945	0.37544	0.5926
SP112865	0	0.128933	0.075	0	0	0	0	0.075	0.06875	0
SP6825	0.1667	0.193267	0.189075	0.19605	0.182367	0.13012	0.26325	0.163575	0.20735	0.6968
SP97278	0.3023	0.32425	0.3462	0	0.6818	0	0	0.294167	0.336167	0.2444
SP124403	0.6094	0.44736	0.6552	0.2917	0.430475	0.48325	0.438433	0.556225	0.401971	0
SP124271	0.24265	0.214783	0.1237	0	0.232967	0.14645	0.25	0.2005	0.174033	0.32995
SP111084	0.202314	0.2108	0.1624	0.21456	0.192325	0.18792	0.19305	0.198843	0.175669	0.19945
SP101544	0.409275	0.362525	0.9394	0.9394	0.295767	0.263233	0.4683	0.44778	0.439443	0.66665
SP135299	0.28545	0.212483	0.3872	0.4667	0.2835	0.4976	0.2943	0.317767	0.24045	0.4667
SP117408	0.0649	0.101433	0.0719	0.0688	0.0968	0.1158	0.0921	0.0916333	0.0719	0.1667
SP107361	0.2449	0.1351	0.201425	0.19	0.2075	0	0.1351	0.201225	0.201425	0
SP117650	0.171433	0.185417	0.1966	0.204275	0.1523	0.1833	0.1731	0.185171	0.185417	0.1481
SP1174	0.53075	0.385437	0.44475	0.6	0.395975	0.42795	0.3787	0.373638	0.36632	0.38786
SP23479	0.2905	0.2905	0.2905	0.2	0.2905	0.2	0.261833	0.217467	0.217467	0.1463
SP82103	0.4762	0.529333	0.462483	0.481	0.425	0.4762	0.4412	0.437862	0.4397	0
SP116343	0.36745	0.297533	0.28285	0.7442	0.260025	0.2467	0.5221	0.36371	0.330567	0.7442
SP111058	0.368133	0.278186	0.344473	0.364729	0.319943	0.331571	0.418162	0.34985	0.355189	0.4402
SP107104	0	0.4	0	0	0.2769	0.1538	0	0.237233	0.4	0
SP70756	0.36945	0.325667	0.36945	0.348	0.2846	0.329825	0.325667	0.30642	0.2635	0.4889
SP107359	0.8293	0.5714	0.5714	0.5714	0	0	0.5714	0.70035	0.70035	0
SP68348	0.447217	0.44862	0.53546	0.56212	0.4413	0.46236	0.46844	0.496242	0.501269	0.68535
SP53618	0.39098	0.310786	0.294162	0.3138	0.3382	0.312346	0.3368	0.309855	0.356237	0.259067
SP122590	0.4872	0.438275	0.578567	0	0.382867	0.357	0.8966	0.4919	0.50358	0.8966
SP99001	0.1905	0.2249	0	0	0	0	0.1579	0.2249	0.2055	0
SP124456	0.350083	0.400767	0.30302	0.4177	0.42354	0.4597	0.451517	0.378567	0.356714	0
SP56569	0.3256	0.365344	0.341825	0.25525	0.33892	0.28434	0.4265	0.3196	0.322358	0.2857
SP111099	0.487575	0.3719	0.549	0.6365	0	0.3275	0.396017	0.47001	0.446108	0.6286
SP97747	0.35475	0.392	0.35475	0.3341	0.33028	0.3494	0.1111	0.3494	0.363967	0
SP99089	0.5398	0.509025	0.774367	0.774367	0.505733	0.66155	0.9231	0.66615	0.66615	0
SP116766	0.355975	0.41978	0.2525	0.2763	0.41665	0.41665	0.33335	0.3893	0.394111	0.1667
SP79968	0.2326	0.353	0.322933	0.2903	0.3139	0.3139	0.25045	0.38654	0.346375	0.3882
SP21057	0.2963	0.249933	0.243083	0.24595	0.28325	0.2924	0.2279	0.24396	0.2498	0.2558
SP123840	0	0	0	0	0	0	0	0.0556	0.0556	0
SP105577	0.2837	0.2894	0.2991	0.3125	0.2489	0.26	0.34625	0.332789	0.299043	0.2658
SP30083	0.167933	0.134767	0.158425	0.167933	0.0682	0.0934	0.19925	0.14992	0.18808	0.19925
SP107379	0.42555	0.379217	0.373067	0.4444	0.264167	0.45415	0.39295	0.4814	0.414683	0.4722
SP39248	0.340833	0.298725	0.1795	0	0.2871	0.3219	0.4643	0.271767	0.295333	0
SP23775	0.1955	0.178473	0.36648	0.19694	0.255	0.20328	0.238743	0.2211	0.208121	0.349033
SP1781	0.489744	0.513804	0.550554	0.473214	0.477586	0.578989	0.537087	0.488642	0.534111	0.636888
SP13278	0.0962	0.0962	0.0962	0.095	0	0	0	0.0962	0.0962	0
SP5473	0.8421	0.38004	0.64105	0.8421	0	0	0.8421	0.5024	0.44455	0.6778
SP6223	0.427067	0.517967	0.5467	0.457367	0	0	0.4583	0.4558	0.461343	0.4583
SP116528	0	0.3519	0.68	0	0	0.4662	0.4	0.5	0.6341	0
SP94588	0.480575	0.30995	0.47946	0.69805	0.4155	0.4155	0.545833	0.365463	0.417378	0.8461
SP117189	0.1625	0.2	0.126433	0.2	0.125	0.125	0.2	0.1625	0.112075	0.2
SP112843	0.16205	0.1266	0.1128	0.1546	0.12895	0.1987	0.1128	0.12605	0.122071	0.1165
SP107371	0.8889	0.541133	0.592967	0	0	0.34285	0.9091	0.555163	0.66315	0.9091
SP122361	0	0.5541	0	0.2329	0	0.1034	0.2	0.2152	0.1524	0.2941
SP99161	0.32425	0.311283	0.3344	0.3552	0.3421	0.3421	0.334729	0.36165	0.328043	0.42435
SP49591	0.49105	0.425075	0.486333	0.467325	0.338	0.214933	0.553733	0.3271	0.45372	0.6441
SP72262	0.4057	0.36	0.36	0.4057	0.3333	0.36	0.36	0.23065	0.4057	0.3127
SP58612	0.475975	0.401233	0.44256	0.60395	0.44295	0.392414	0.5086	0.392469	0.347925	0.7879
SP2158	0	0.161567	0.19065	0	0.1729	0.2593	0.19065	0.174233	0.1127	0.2593
SP61453	0.50445	0.5578	0.8372	0.8372	0	0	0.8372	0.50445	0.50445	0.8372
SP89687	0.607675	0.590925	0.51726	0.607675	0.6192	0.5617	0.728367	0.518217	0.52186	0.438733
SP112273	0.5742	0.5742	0.52022	0.651	0.50425	0.5659	0.69326	0.561289	0.48835	0.75
SP56754	0.385188	0.421808	0.507114	0.62726	0.2873	0.327357	0.53575	0.443031	0.427082	0.45515
SP102517	0	0	0	0	0	0	0.45505	0	0	0
SP99069	0.65625	0.471233	0.5688	0.5871	0.5241	0.5241	0.5789	0.5097	0.464413	0.512133
SP116606	0.17965	0.159517	0.182737	0.18945	0.17825	0.178214	0.222867	0.188883	0.191744	0
SP79383	0.249175	0.249175	0.249175	0.249175	0.2815	0.2815	0.249175	0.22076	0.249175	0
SP117661	0.461667	0.452386	0.441075	0.494067	0.384525	0.357133	0.494067	0.408189	0.40651	0.5957
SP116862	0	0.6471	0	0	0	0	0	0.6471	0.6471	0
SP116630	0.6984	0.558583	0.45558	0.619	0.669167	0.669167	0.4686	0.510014	0.562825	0.6984
SP64296	0.3988	0.439213	0.4727	0.3972	0.22785	0.4583	0.38112	0.413013	0.356162	0.55875
SP135270	0.38388	0.3388	0.299817	0.35084	0.2724	0.25188	0.332567	0.314425	0.313877	0.44115
SP112863	0	0.2193	0.1739	0	0.3542	0.1993	0.2647	0.2193	0.1739	0
SP111088	0.6667	0.312138	0.6218	0.4494	0.1269	0.0678	0.4088	0.298286	0.323211	0.4697
SP111045	0.27022	0.240683	0.0639	0	0.306867	0.282167	0.06525	0.164725	0.23633	0.375
SP117509	0.2175	0.252111	0.197082	0.183	0.1745	0.20844	0.2825	0.209635	0.208606	0.312867
SP12049	0.250967	0.256745	0.35468	0.43774	0.2851	0.35128	0.49785	0.346553	0.288967	0.38725
SP90893	0.33132	0.331667	0.382071	0.682167	0	0.6122	0.33885	0.423687	0.404225	0.5218
SP102187	0.443633	0.50684	0.535233	0.41785	0.28355	0.56805	0.7419	0.35082	0.4711	0.7419
SP101528	0.5983	0.483917	0.5983	0.8591	0	0.386767	0.5572	0.485857	0.55348	0.5983
SP115070	0.0645	0.1674	0.0645	0.0645	0.0645	0.0645	0.0645	0.0645	0.0645	0
SP92268	0.39642	0.521917	0.530083	0.43808	0.3968	0.3601	0.572586	0.4478	0.496525	0.663367
SP1003	0.352675	0.375238	0.30575	0.53695	0.5676	0.2924	0.483525	0.304422	0.335165	0.360083
SP117655	0.413575	0.226012	0.36535	0.46602	0.300467	0.341467	0.415875	0.432755	0.366392	0.8
SP50135	0.25	0.33485	0.375	0.25	0.25795	0.3029	0	0.27646	0.338233	0
SP124391	0.4615	0.373325	0.3939	0.4333	0.1935	0.1935	0	0.366275	0.43432	0.1562
SP79282	0.129	0.23115	0.3333	0	0.129	0.129	0.129	0.129	0.23115	0
SP35617	0.208567	0.185229	0.1625	0.1356	0.2509	0.172567	0.127533	0.20104	0.183517	0
SP39298	0.3077	0.33058	0.31175	0.1956	0.359	0	0.34175	0.291	0.30264	0.3182
SP124295	0.1957	0.184	0.18016	0.167233	0.136867	0.08915	0.251825	0.239071	0.22255	0
SP50163	0.2404	0.214333	0.25	0.25	0.248367	0.248367	0.158667	0.2986	0.25295	0.129
SP127638	0.492733	0.526775	0.520325	0.492733	0.3986	0.354575	0.5235	0.394983	0.454475	0.549533
SP112156	0.207	0.192075	0.1797	0.1905	0.251033	0.197267	0.1613	0.2235	0.1765	0.1613
SP117470	0.301933	0.2288	0.232786	0.5417	0.231675	0.20485	0.29375	0.21945	0.214022	0.5417
SP27825	0.701	0.5358	0.60045	0	0.400467	0.3507	0.9377	0.554025	0.5215	0
SP111170	0.332044	0.266612	0.26804	0.313733	0.193625	0.2117	0.3082	0.320842	0.287006	0.291133
SP101548	0.48	0.3815	0.387667	0.48	0.2821	0.2821	0.40665	0.373067	0.37075	0.349467
SP125755	0.471925	0.405917	0.399167	0.4988	0.37615	0.335733	0.647733	0.39085	0.376378	0.9592
SP121783	0.36665	0.293675	0	0.28785	0.355533	0.3333	0.3455	0.1081	0.36665	0
SP78813	0.1795	0.17545	0.1795	0.1795	0	0	0.1795	0.1795	0.17545	0
SP98359	0	0.3152	0.37745	0.6176	0	0	0.350875	0.498233	0.38305	0.234
SP99329	0.11555	0.112	0.1409	0.13095	0.0537	0.087725	0.141333	0.115457	0.12638	0
SP124329	0.0786	0.105858	0.0885375	0.11635	0.1181	0.09318	0.129783	0.107805	0.0990923	0.078675
SP111000	0.24802	0.258217	0.3651	0.284083	0.15735	0.15735	0.27226	0.261319	0.27034	0.263433
SP121865	0	0	0.2778	0	0.2506	0	0.24375	0	0.4089	0
SP29987	0.43908	0.340082	0.3182	0.392333	0.3333	0.317575	0.326725	0.349627	0.296236	0.27965
SP16958	0.405567	0.439169	0.44851	0.470571	0.30318	0.386978	0.335244	0.419278	0.447929	0.4025
SP112913	0.175	0.175	0	0	0.175	0.3318	0	0.1848	0	0
SP5980	0.387867	0.349938	0.32864	0.312975	0.445467	0.454533	0.313771	0.330169	0.330154	0.3816
SP122725	0.899	0.7041	0.626143	0.71295	0.8969	0.8969	0.79925	0.616712	0.616712	0.9032
SP107805	0.398625	0.286933	0.336075	0.398625	0.42235	0.30648	0.312567	0.307131	0.373017	0.3749
SP13421	0.1707	0.3802	0.1707	0	0.2778	0.5897	0.5897	0.400533	0.400533	0
SP99045	0.43435	0.4638	0.43404	0.484	0.429633	0.3465	0.42644	0.4028	0.4659	0.6471
SP99049	0.3676	0.4203	0.37715	0.3277	0	0.3498	0.39705	0.44815	0.428233	0.494033
SP105213	0.2035	0.25765	0.193533	0.30625	0.28158	0.28158	0.2168	0.1979	0.2408	0
SP111008	0.1089	0.19945	0.13004	0.143725	0.2022	0.1519	0.171333	0.144778	0.13668	0.3065
SP50155	0.5352	0.619625	0.8333	0.8333	0.466133	0.511214	0	0.612857	0.6596	0.6
SP23639	0.50245	0.50162	0.4574	0.4906	0.430867	0.4609	0.4906	0.468533	0.469667	0
SP102143	0.393767	0.33445	0.563325	0.55655	0.224967	0.257	0.3406	0.429937	0.363822	0.64575
SP112881	0	0	0	0	0	0	0	0	0.2388	0
SP111146	0	0	0	0	0.3636	0.3636	0	0.3231	0	0
SP4820	0.4118	0.408117	0.4634	0	0.227	0	0	0.413833	0.482117	0.2177
SP49187	0	0.124688	0.0842	0.1692	0.0973	0.113767	0	0.127917	0.12416	0.1373
SP49481	0	0.1862	0	0.1429	0	0	0	0.0714	0	0
SP52284	0.21498	0.22276	0.188778	0.227325	0.253867	0.2029	0.30045	0.186646	0.208021	0.24545
SP57084	0.37635	0.367778	0.372071	0.50088	0.187033	0.31046	0.496	0.461527	0.495136	0.4455
SP21528	0.53055	0.442371	0.54162	0.601675	0.524267	0.544467	0.4743	0.463045	0.459827	0.5
SP102913	0.3228	0.233886	0.355275	0	0	0.4705	0.2422	0.28	0.321218	0
SP43688	0.2941	0.4552	0.35075	0.291833	0.3771	0.34645	0.419	0.25534	0.337637	0
SP101552	0.393833	0.29785	0.228386	0.31586	0.14044	0.242822	0.4561	0.282618	0.266585	0.5789
SP48850	0.9091	0.530633	0.566875	0.9091	0	0	0.565075	0.67075	0.53998	0.9091
SP13594	0	0.3125	0	0	0	0	0	0.3125	0.3125	0
SP1009	0.40385	0.41796	0.42996	0.56	0.48855	0.47315	0.4902	0.456786	0.456267	0
SP125730	0.2523	0.255167	0.2523	0.2523	0.2105	0.2243	0.2523	0.2509	0.2286	0.2941
SP50145	0.3343	0.313767	0.4365	0	0.3123	0.351067	0.265	0.40395	0.436425	0
SP48504	0	0.1842	0.1463	0	0	0	0.4359	0.183333	0.191233	0
SP107386	0	0.4167	0.4167	0.4167	0	0.5778	0.4167	0.485333	0.4167	0
SP112919	0	0.1628	0.16805	0.1628	0	0	0	0.16805	0.16805	0
SP135222	0.2727	0.226586	0.236625	0.24165	0.2727	0.204867	0	0.221413	0.238233	0
SP59448	0.243115	0.253379	0.29074	0.24674	0.27006	0.254775	0.255714	0.236873	0.273627	0.206367
SP50321	0.507575	0.599643	0.4878	0.4258	0.4527	0.457367	0.5452	0.4624	0.535525	0.5857
SP135274	0	0.0732	0	0	0	0	0.0774	0	0	0.0732
SP99129	0.19295	0.214963	0.21842	0	0.1261	0.0816	0.1517	0.211656	0.199187	0
SP105006	0.6369	0.2846	0.5418	0.6369	0.6369	0.560967	0.1186	0.477275	0.436	0.1967
SP57066	0.395	0.38235	0.335708	0.421	0.426783	0.39276	0.3803	0.348143	0.326424	0.6279
SP107084	0.32735	0.389	0.3214	0.2857	0.3214	0.3214	0.32275	0.30696	0.26785	0
SP59444	0.2002	0.2369	0.1862	0.1429	0.29565	0.278933	0.1373	0.277617	0.247533	0
SP98297	0.23525	0.290015	0.224243	0.3171	0.3683	0.294	0.375	0.300033	0.295894	0
SP111168	0.177367	0.2075	0.18535	0.304175	0.190033	0.236275	0.2352	0.2401	0.24266	0.2037
SP102804	0.23675	0.219114	0.2157	0	0.2102	0.2116	0.19266	0.22404	0.231125	0.1984
SP116604	0.5	0.325322	0.266156	0.4667	0.5	0.281033	0.4	0.276457	0.27886	0
SP111117	0.172543	0.156473	0.1583	0.1608	0.147937	0.137942	0.199471	0.163268	0.168153	0.14125
SP107461	0	0	0	0	0.3784	0.3784	0	0.3784	0	0
SP117944	0.255967	0.21388	0.3125	0.3125	0.23155	0.20682	0.244233	0.23974	0.197283	0.2304
SP114986	0.3171	0.43485	0.43485	0.43485	0.3133	0.3133	0.5835	0.4131	0.4131	0
SP124021	0	0.2857	0.2857	0.2857	0	0	0	0.2857	0.2857	0
SP99011	0.2577	0.287743	0.33395	0.3387	0.25648	0.2795	0.3658	0.325044	0.278036	0.3684
SP112907	0	0.18335	0.1404	0.15	0	0.1715	0.1	0.181	0.1625	0
SP112833	0	0.12935	0	0	0.13135	0.145533	0.09925	0.182767	0.166325	0
SP116712	0.16255	0.178267	0.178267	0.1587	0.15315	0.15315	0.178267	0.177857	0.182083	0.1842
SP63356	0.6056	0.5315	0.37385	0.60655	0	0.37915	0.4488	0.335525	0.349917	0.9101
SP59270	0.197783	0.290956	0.267907	0.267907	0.294	0.3997	0.167711	0.325106	0.267907	0
SP112198	0.2667	0.2271	0.2839	0	0.23335	0.2	0.2631	0.2	0.25	0.2804
SP96118	0.0949	0.0938522	0.108018	0.09752	0.0840231	0.0989636	0.077625	0.0993045	0.0936792	0.0816667
SP5279	0.3941	0.3941	0.5882	0.5882	0	0.235033	0.5882	0.3128	0.2958	0.5882
SP97258	0	0.2094	0.1912	0	0.15	0.15	0	0	0	0.148167
SP135389	0.1452	0.18275	0	0	0.1944	0.3099	0	0.170233	0.1462	0
SP116949	0.4562	0.3521	0.362262	0.39458	0.290357	0.320133	0.3249	0.320408	0.333227	0.4463
SP106577	0	0.523375	0.3269	0	0.3835	0.4874	0.2651	0.516	0.5054	0.4185
SP116829	0.1591	0.1591	0.20115	0.1591	0	0	0.1591	0.1591	0.1591	0.1591
SP99193	0.2005	0.1813	0.2266	0.2353	0.1702	0	0.32595	0.211625	0.20334	0
SP102973	0.306833	0.33009	0.3288	0	0.2881	0.35235	0.379217	0.28925	0.31068	0.287633
SP103515	0.231067	0.204383	0.2355	0.238525	0.234875	0.23668	0.23025	0.21507	0.22569	0.26265
SP102733	0	0.2261	0	0	0	0.25395	0	0.23	0.176633	0
SP2766	0.652175	0.597433	0.69445	0.69445	0.362925	0.362925	0.5806	0.430538	0.56715	0.7222
SP59388	0.581067	0.5745	0.767867	0.65118	0.419825	0.34095	0.72875	0.598657	0.581512	0.8918
SP103233	0	0	0.2609	0	0	0	0	0.1644	0.2609	0.2817
SP59460	0	0.3116	0.326183	0.4667	0.3455	0.319043	0.327475	0.329483	0.3371	0
SP6730	0.50915	0.4887	0.50915	0.2754	0.3616	0.2754	0.50915	0.4887	0.485175	0.4478
SP99333	0.2045	0.2828	0.2828	0.2045	0.3689	0.3689	0.293775	0.2828	0.2828	0
SP117712	0.3878	0.270213	0.22375	0.1395	0.216	0.26651	0.2361	0.272083	0.261493	0.1324
SP62110	0.772967	0.71596	0.796067	0.9683	0.3972	0.499633	0.9653	0.685686	0.85406	0.9508
SP99073	0.41635	0.3823	0.44248	0.376	0.328567	0.41635	0.56975	0.401967	0.4222	0.5
SP50147	0.310133	0.247	0.2519	0.35	0.274	0.274	0.1667	0.339575	0.288167	0.4091
SP101540	0.33394	0.300988	0.3531	0.3531	0.25118	0.237575	0.39068	0.295963	0.315386	0.8571
SP98927	0.3636	0.3501	0.4419	0	0.3709	0.3889	0.48075	0.32552	0.375738	0.5417
SP83967	0.0929167	0.103118	0.19325	0.0992	0.095	0.0959667	0.1277	0.115212	0.121355	0
SP48135	0.5	0.471633	0.60715	0	0.5	0.5	0.753	0.46406	0.478725	0.7143
SP111026	0.403667	0.37165	0.354275	0.46675	0.251333	0.33415	0.3226	0.299733	0.296238	0.2898
SP98875	0.3125	0.378175	0.36765	0.38232	0.1563	0.27392	0.4328	0.351871	0.3127	0.7
SP112269	0.487433	0.40724	0.5663	0.64705	0.417017	0.45544	0.38382	0.437431	0.406838	0.58
SP99061	0.46632	0.443638	0.398317	0.32495	0.3718	0.3718	0.391783	0.426887	0.388655	0.4301
SP108059	0.217825	0.2101	0.2736	0.24015	0.2214	0.2214	0.2101	0.240833	0.258683	0.2785
SP89519	0.2587	0.2795	0.238833	0.2174	0.2587	0.2587	0.238833	0.238833	0.238833	0.24955
SP50121	0.1669	0.182933	0.1446	0	0.13655	0.2119	0.1429	0.14735	0.1375	0
SP59456	0.416167	0.4062	0.32455	0.3044	0.477433	0.47845	0.5309	0.388778	0.372933	0.4333
SP124441	0.53575	0.419967	0.4624	0.9655	0	0.3125	0.328517	0.4624	0.32456	0.622
SP116624	0	0	0	0.5405	0	0	0	0.25975	0.2609	0
SP103555	0	0.2459	0	0	0	0	0	0.2459	0.2459	0
SP125725	0.60355	0.4178	0.491033	0.55848	0.4154	0.3654	0.54225	0.537833	0.530167	0.49585
SP125721	0.5789	0.7132	0.4496	0.7132	0.5075	0.2846	0.7132	0.4578	0.4578	0.9189
SP40736	0	0.16	0.16	0	0	0	0	0.23265	0.16	0
SP66159	0.611567	0.386887	0.45365	0.46755	0.3831	0.39036	0.557	0.425267	0.428575	0.4276
SP56730	0.363586	0.398982	0.44607	0.376967	0.3719	0.41335	0.450167	0.4236	0.404665	0.449775
SP98973	0.227929	0.23807	0.229814	0.3226	0.30508	0.302933	0.50735	0.291925	0.333258	0
SP116282	0	0	0	0	0	0.1667	0	0	0	0
SP135488	0.5419	0.482083	0.5419	0.9216	0.4973	0.196733	0.56795	0.3703	0.386417	0.8238
SP112283	0	0.17406	0	0	0	0.1362	0.24	0.1724	0.1923	0.1818
SP107373	0.66895	0.43505	0.4245	0.449	0.49115	0.449	0	0.53006	0.508383	0.7059
SP975	0.3762	0.430957	0.341137	0.392	0.295083	0.31944	0.53385	0.370006	0.389253	0.44095
SP78533	0.15295	0.124825	0.138125	0.15295	0.125	0.10485	0.1302	0.1382	0.124825	0.1809
SP71228	0.34845	0.299333	0.4191	0.4191	0.2655	0.4016	0.270625	0.325067	0.277629	0.4366
SP85287	0.19655	0.222625	0.1186	0.1186	0.234867	0.234867	0	0.1721	0.15936	0
SP23498	0.21615	0.37185	0.1702	0.26535	0.16	0.3768	0.3542	0.338243	0.253771	0.2648
SP28581	0.361133	0.545667	0.74445	0.4889	0	0.4889	0.549367	0.52085	0.49168	0.662967
SP99213	0.3469	0.1732	0.20865	0.3469	0.3469	0.3469	0.192767	0.22475	0.173633	0.0833
SP116616	0.28	0.353967	0.3755	0.4783	0.348067	0.5061	0.4783	0.4357	0.33504	0.2
SP107034	0	0.3571	0	0	0.3571	0.1892	0	0.237433	0.375	0
SP116853	0	0.1042	0	0	0	0	0	0.1009	0.1042	0
SP61703	0.579033	0.527743	0.6444	0.46872	0.37492	0.405067	0.618875	0.401813	0.486057	0.9219
SP49223	0.3881	0.3881	0.1607	0	0	0.3	0.32255	0.3553	0.2744	0
SP21193	0.456433	0.38605	0.418425	0.50222	0.425214	0.3827	0.602633	0.407642	0.392244	0.7451
SP2148	0.361133	0.36218	0.44645	0.2992	0.31208	0.329125	0.5	0.301957	0.267556	0.5
SP70266	0.4	0.471767	0.3525	0.41055	0.4	0.4	0.471767	0.350367	0.411325	0
SP125771	0.5636	0.544	0.7818	0.7818	0.34935	0.2238	0.680325	0.355883	0.69598	0.541
SP112304	0.3929	0.1129	0.3929	0.3929	0.5066	0.3409	0.1129	0.3409	0.3929	0.1429
SP102690	0	0.3538	0.1639	0.36	0	0.3538	0	0.25885	0.25885	0
SP117216	0.43805	0.3699	0.43805	0.43805	0.3659	0.3659	0.4124	0.43805	0.3699	0.3261
SP97775	0.491711	0.44406	0.455389	0.4681	0.477725	0.5366	0.404175	0.4374	0.428373	0.5526
SP69573	0.2833	0.26665	0.3083	0.3087	0.20685	0.20685	0.2833	0.24925	0.288867	0
SP70106	0.33335	0.184775	0.2494	0.251233	0.2308	0.1091	0.249433	0.23588	0.23588	0.14325
SP82435	0.470267	0.4131	0.4859	0.55885	0.456033	0.48242	0.578667	0.436575	0.412	0.489967
SP114903	0.32885	0.28654	0.326717	0.279133	0.3839	0.223925	0.4648	0.348843	0.3477	0.6452
SP50161	0.36955	0.332327	0.456933	0.3956	0.34935	0.354017	0.4068	0.340373	0.32552	0.403267
SP59400	0.295871	0.25076	0.265	0.292133	0.28266	0.28174	0.2339	0.270611	0.2597	0.126
SP111095	0.30595	0.352811	0.309575	0.33635	0.3649	0.60195	0.46775	0.341045	0.283067	0.36255
SP124341	0.223433	0.25858	0.21295	0.3607	0.2263	0.1679	0.3607	0.146325	0.1705	0
SP43696	0.3587	0.418533	0.475433	0.3748	0.335425	0.331125	0.46625	0.392914	0.407414	0.2
SP124359	0.5048	0.4274	0.41455	0	0.2262	0.191	0.407	0.302775	0.3352	0.3273
SP103416	0.4062	0.19695	0.321933	0.1148	0.21595	0.2077	0.2791	0.36165	0.25436	0
SP33544	0.411817	0.3671	0.45286	0.3854	0.298775	0.308333	0.45272	0.397527	0.370718	0.422925
SP103436	0.1803	0.1803	0.1803	0	0	0	0.2598	0.1803	0.1803	0.3091
SP110861	0	0.37405	0.34275	0.4043	0	0	0	0.4199	0.3662	0
SP123852	0.7317	0.4903	0.5492	0	0.2815	0	0.7317	0.5492	0.4759	0.7317
SP3415	0.2901	0.271689	0.289667	0.5909	0.16405	0.2105	0.496967	0.2738	0.253	0.38165
SP106656	0.1429	0.45796	0.288233	0.2083	0.357	0.62985	0.36375	0.3768	0.328062	0.2459
SP102168	0.7368	0.57595	0.57595	0.57595	0.4167	0	0.57595	0.4878	0.4596	0.7368
SP111091	0.125117	0.131582	0.131722	0.139825	0.1411	0.12176	0.135733	0.12005	0.134346	0.1321
SP50169	0.1875	0.36915	0.38648	0.42295	0.331867	0.25	0.2727	0.35267	0.325245	0.3733
SP117538	0.1111	0.227417	0.31355	0	0	0.2903	0.2097	0.2675	0.2618	0.6061
SP106834	0.1167	0.1167	0.1167	0	0	0	0.18765	0.1167	0.09345	0
SP125763	0.65475	0.580433	0.500833	0.383825	0.4762	0.4762	0.65475	0.500833	0.483575	0.8333
SP112895	0	0.2646	0	0	0	0	0	0.2646	0.240733	0
SP4535	0	0	0	0	0	0	0	0.38255	0.38255	0
SP117911	0.278733	0.29398	0.26678	0.36855	0.32595	0.33525	0.36855	0.22854	0.2351	0.4237
SP106718	0.0966	0.16675	0.14	0	0.3229	0.4255	0	0.20975	0.138375	0
SP102989	0.2895	0.2895	0	0	0.2895	0.2059	0	0.1996	0.1838	0.0882
SP118038	0.240267	0.17834	0.12468	0.2381	0.07905	0.0731333	0.147725	0.0952571	0.115017	0.2381
SP116578	0	0	0.1961	0	0	0.1369	0	0.2759	0.1961	0
SP116520	0	0.199533	0.3415	0.17465	0.21245	0.187483	0.199533	0.229517	0.199533	0.3415
SP4557	0.4431	0.396825	0.4431	0.4431	0.5333	0.4282	0.5333	0.32932	0.328733	0
SP2349	0	0.25	0.2273	0.2974	0.39645	0.5429	0.226367	0.415133	0.3598	0
SP135436	0.33376	0.25605	0.24614	0.272175	0.198943	0.21774	0.28816	0.261462	0.247936	0.317975
SP123995	0.7941	0.73575	0.7941	0.7941	0	0	0.7941	0.7941	0.73575	0.7941
SP97249	0.58375	0.555567	0.75	0.75	0	0	0.584167	0.4778	0.5132	0.61945
SP5784	0.4194	0.519033	0.519033	0.4194	0.1053	0.0789	0.40912	0.36404	0.38516	0.519033
SP56827	0.190567	0.182487	0.207311	0.24155	0.155433	0.144557	0.1853	0.178309	0.18327	0.190583
SP52232	0.27604	0.2786	0.292	0.23304	0.2083	0.278667	0.278683	0.262906	0.280725	0.30515
SP135186	0.225233	0.24976	0.24852	0.18745	0.1284	0.1443	0.155167	0.196282	0.218512	0.2368
SP75322	0.2345	0.229583	0.246033	0.258775	0.258475	0.262987	0.2917	0.254715	0.249033	0
SP117710	0.219	0.228975	0.249475	0.24515	0.26964	0.242367	0.238267	0.206	0.20564	0.2663
SP116649	0.236267	0.228382	0.208722	0.184625	0.2432	0.241886	0.242675	0.2242	0.207428	0.2121
SP49175	0	0.0738	0.1396	0	0	0.1	0.3333	0.0958667	0.138575	0
SP124281	0.5469	0.29475	0	0	0.3627	0.5469	0.5469	0.333233	0.3467	0.1654
SP99077	0.1888	0.21115	0.1888	0.18005	0.19985	0.212575	0.2273	0.18005	0.2332	0.1752
SP115111	0	0	0.1333	0	0.6	0.6	0	0.1333	0.172033	0
SP55387	0.1158	0.0970111	0.1158	0.100917	0.0909	0.0941167	0.11925	0.102182	0.115918	0.102
SP85836	0	0.275	0	0.275	0.3092	0	0.4474	0.220933	0.2654	0.12
SP111033	0.419867	0.350318	0.36494	0.398875	0.32066	0.28448	0.43265	0.3293	0.345575	0.506833
SP101662	0.15815	0.200387	0.197025	0.1569	0	0	0.194367	0.223814	0.20495	0.1569
SP10563	0.31305	0.230433	0.3902	0.33795	0.24735	0.24735	0.334075	0.27134	0.312167	0
SP102795	0.25	0.23826	0.27095	0.2544	0.225533	0.1759	0.1202	0.27764	0.227786	0
SP50107	0.58485	0.457683	0.52375	0.5856	0.48074	0.49658	0.6391	0.544763	0.587883	0.60245
SP123998	0	0.44165	0.4875	0	0	0.48265	0.4875	0.4368	0.4368	0.47985
SP116227	0	0.1944	0	0	0	0.1944	0	0	0	0
SP97685	0.459067	0.620975	0.695933	0.86	0.48535	0.3636	0.678467	0.6222	0.585771	0.451867
SP9433	0.459975	0.353212	0.36412	0.42655	0.14595	0.177933	0.4918	0.325633	0.363422	0.4783
SP135484	0	0.376	0.8431	0	0.087	0.087	0.65885	0.52025	0.52025	0.4653
SP125737	0.367483	0.367483	0.367483	0.367483	0.185875	0.185875	0.367483	0.352428	0.348787	0.3896
SP98975	0.29168	0.3038	0.1792	0.303	0.35608	0.30225	0.24505	0.29894	0.2865	0.0882
SP99093	0.224433	0.229125	0.2143	0.22875	0.2327	0.2327	0.2009	0.24704	0.22902	0.2143
SP107007	0.3918	0.33534	0.392767	0.392767	0.3942	0.39685	0.3846	0.347633	0.34055	0.3846
SP107774	0.0702	0.14	0	0.0631	0	0.25235	0	0.23425	0.190767	0
SP60610	0.7442	0.52538	0.75255	0.58265	0.4677	0.4211	0.58265	0.642067	0.642067	0.71655
SP102622	0	0.1552	0.1667	0.1552	0.1784	0.16095	0	0.254067	0.2058	0
SP103715	0.2	0.21765	0.2631	0.213775	0.211667	0.289933	0.21765	0.258343	0.239129	0
SP123988	0.49595	0.4375	0.18915	0.16015	0	0.2292	0.75	0.183125	0.313325	0
SP117043	0	0.3528	0.6481	0.6481	0	0	0.6481	0.6481	0.6481	0
SP118083	0.58105	0.328917	0.44558	0.55375	0.265667	0.3629	0.399475	0.30698	0.390275	0.7917
SP112217	0.30915	0.373	0.36255	0.30956	0.20835	0.370167	0.4049	0.367429	0.363791	0.3611
SP112190	0.39575	0.399511	0.44362	0.34235	0.435433	0.426575	0.452033	0.442417	0.45055	0.5
SP116224	0	0	0.1071	0	0	0	0	0.1071	0.1877	0
SP30493	0.2071	0.206386	0.1619	0.1746	0.17615	0.17615	0.21995	0.183175	0.192362	0
SP106602	0	0	0	0	0	0	0	0	0.4286	0.2909
SP108065	0.373625	0.323475	0.394267	0.323475	0.3838	0.35645	0.3648	0.36472	0.373625	0.4865
SP2147	0.2451	0.32322	0.312183	0.261475	0.273467	0.22046	0.334275	0.251117	0.308892	0.3438
SP69077	0.490967	0.372093	0.46768	0.36626	0.30995	0.336122	0.45522	0.362	0.349167	0.6014
SP6813	0.2693	0.210629	0.20825	0.159667	0.19925	0.20045	0.18115	0.2175	0.20825	0.2259
SP94332	0.54165	0.369837	0.49371	0.4643	0.1786	0.283167	0.54165	0.402171	0.406494	0.6186
SP107356	0.2105	0.18495	0.2188	0	0	0	0	0.2105	0.214533	0
SP116512	0.37835	0.37835	0.2791	0.283667	0.15395	0.2273	0.37835	0.2329	0.2329	0.5294
SP124981	0.3793	0.3033	0.2273	0	0	0.271167	0.2273	0.2069	0	0.2607
SP112245	0.3214	0.278075	0.244375	0.3214	0	0	0.2579	0.2652	0.25104	0.29705
SP57267	0.61982	0.556839	0.493117	0.470157	0.440633	0.4725	0.501325	0.456688	0.464994	0.6932
SP112963	0	0	0	0.325	0.276867	0.2528	0	0.32915	0.279433	0
SP112837	0.4426	0.167833	0.373833	0.4062	0	0	0	0.291375	0.291375	0.0533
SP122560	0.9048	0.61905	0.9048	0.9048	0	0	0.6315	0.61905	0.61905	0.9048
[truncated: 1,357 more rows]

## Sheet: Supp_table_8_rank_patient_PCAWG
patient_id	angiogenesis	death	growth	immortality	immune evasion	inflammation	metabolism	metastasis	proliferation	Genome Instability
[truncated: 2,399 more rows]
