# Supplementary material for: The temporal evolution of cancer hallmarks
Source: Research Square preprint supplement (doi:10.21203/rs.3.rs-5499335/v1), 2024-12-11
Supplement: Supplementary file 2 [file 6e9917cae29fca92108fa961.docx]

**The temporal evolution of cancer hallmarks**

**Supplementary figures**

Supplementary Figure 1. Mean Variant Allele Frequency (VAF) for each cancer hallmark, derived from synonymous mutations only from all primary tumors in the TCGA database.

Supplementary Figure 2. Mean Variant Allele Frequency (VAF) for each cancer hallmark, derived from from all primary tumors in the TCGA database discarding tumors with evidence of aneuploidy (only ploidy 2 individuals).

Supplementary Figure 3. Distribution of the mean VAF of random genes (neutral: red) and genes involved in one of the hallmarks (blue) across nonsynonymous mutations.

Supplementary Figure 4: Hallmark ordering analysis by using median VAF instead of mean VAF.

Supplementary Figure 5: Hallmark ordering of pancancer data across 100 iterations of cancer hallmark gene subsets.

Supplementary Figure 6: Oncoprint plot showing the mutational landscape of genome instability genes.

Supplementary Figure 7: Hallmark ordering of pancancer data without TP53 based on VAF.

Supplementary Figure 8: Hallmark ordering of pancancer data across unique hallmark genes.

Supplementary Figure 9. Metric resulting from the division of VAF by dN/dS for each cancer hallmark from all primary tumors in the TCGA database.

Supplementary figure 10. Mean Variant Allele Frequency (VAF) for each cancer hallmark, using only genes under positive selection from all primary tumors in the TCGA database.

Supplementary figure 11. Volcano plot for dN/dS of nonsense mutations in a) genome instability genes, b) immune evasion genes, and c) inflammation genes.

Supplementary Figure 12: Hierarchical clustering of spearman correlation values of the rank order according to VAF for 32 cancer subtypes. Colours are displayed only when the correlation is significant based on Benjamin Hochberg correction.

Supplementary Figure 13. Relative ordering of cancer hallmarks using Spearman correlation across 32 cancer types, according to dN/dS.

Supplementary Figure 14. Hierarchical clustering of spearman correlation values of the rank order according to VAF for 32 cancer subtypes without TP53. No correlation is significant based on Benjamin Hochberg correction.

Supplementary Figure 15. Relative ordering of cancer hallmarks using Spearman correlation across 32 cancer types, comparing VAF (vertical axis) and dN/dS ranking (horizontal axis).

Supplementary Figure 16: Distribution of hallmark rank per patient from Pancancer data without TP53 based on VAF.

Supplementary Figure 17: Kaplan-Meier curves for 6 clusters predicted using ASCETIC algorithm in all patients from all tumor types.

Supplementary Figure 18: Frequency of ranks for true hallmarks.

Supplementary Figure 19: Frequency of ranks for randomized gene lists from hallmarks (pseudohallmarks).

Supplementary Figure 20: Pancancer hallmark ordering analysis by using VAF on PCAWG data after removing TP53.
